# Supplementary material for: Pan-cancer analysis reveals IGFL2 as a potential target for cancer prognosis and immunotherapy
Source: Sci Rep. 2023 Apr 13;13:6034. doi: 10.1038/s41598-023-27602-7 (PMC10101991; doi:10.1038/s41598-023-27602-7)
Supplement: Supplementary file 1 — Supplementary Information. [file 41598_2023_27602_MOESM1_ESM.xlsx]

## Sheet: Prognosis
OS			DFS
CancerCode	HR(95%CI)	pvalue	CancerCode	HR(95%CI)	pvalue
KIRP	5.50(3.04,9.95)	6e-10	PAAD	1.39(1.09,1.78)	0.006
KIRC	1.75(1.43,2.14)	3e-08	KIRP	3.18(1.20,8.43)	0.02
BLCA	1.12(1.04,1.21)	0.004	PCPG	23.88(0.64,888.13)	0.08
LIHC	1.60(1.13,2.27)	0.007	CHOL	1.69(0.86,3.32)	0.12
MESO	1.18(1.04,1.33)	0.01	LUAD	1.12(0.96,1.31)	0.14
PAAD	1.14(1.02,1.27)	0.02	ESCA	1.17(0.94,1.44)	0.16
SKCM	1.14(1.01,1.29)	0.04	PRAD	1.40(0.81,2.41)	0.21
ACC	1.23(0.93,1.62)	0.13	LIHC	1.32(0.82,2.13)	0.25
PCPG	4.67(0.38,56.63)	0.22	HNSC	1.07(0.89,1.27)	0.47
READ	1.21(0.83,1.74)	0.31	STAD	1.06(0.86,1.31)	0.58
TGCT	1.78(0.42,7.48)	0.42	THCA	1.05(0.87,1.27)	0.59
PRAD	1.54(0.47,5.07)	0.47	TGCT	1.11(0.75,1.64)	0.61
LUSC	1.03(0.94,1.13)	0.48	LGG	1.25(0.51,3.08)	0.63
UCS	1.12(0.81,1.55)	0.5	ACC	1.16(0.52,2.59)	0.72
CESC	1.05(0.91,1.22)	0.52	UCS	1.12(0.54,2.34)	0.77
GBM	1.26(0.62,2.58)	0.52	OV	1.01(0.91,1.12)	0.83
BRCA	1.04(0.91,1.19)	0.56	CESC	1.00(0.78,1.29)	0.98
HNSC	1.02(0.95,1.09)	0.62	DLBC	1.03(0.15,7.12)	0.98
STAD	1.03(0.90,1.17)	0.67	MESO	1.00(0.62,1.62)	0.99
COAD	1.03(0.88,1.21)	0.72	UCEC	0.28(0.07,1.13)	0.06
CHOL	1.05(0.60,1.84)	0.87	COAD	0.73(0.47,1.14)	0.16
UCEC	1.02(0.65,1.59)	0.94	LUSC	0.93(0.78,1.12)	0.46
LGG	0.49(0.25,0.96)	0.04	BRCA	0.94(0.78,1.14)	0.54
SARC	0.90(0.73,1.12)	0.34	KIRC	0.45(0.03,7.19)	0.58
ESCA	0.93(0.78,1.11)	0.42	BLCA	0.95(0.77,1.18)	0.66
KICH	0.19(9.2e-4,37.57)	0.53	READ	0.98(0.41,2.35)	0.96
DLBC	0.76(0.21,2.70)	0.67	SARC	1.00(0.80,1.25)	0.98
LAML	0.74(0.09,6.00)	0.78
OV	0.99(0.91,1.07)	0.79
THYM	0.93(0.39,2.21)	0.88
THCA	0.99(0.77,1.25)	0.91
LUAD	1.00(0.90,1.11)	0.99

## Sheet: TIMER
	B cell	T cell CD4+	T cell CD8+	DC	Macrophage	Neutrophil	B cell P	T cell CD4+ P	T cell CD8+ P	DC P	Macrophage P	Neutrophil P
ACC	0.180918	-0.0585528	0.182438	0.116363	-0.112923	0.0751375	0.352102	0.80547	0.267504	0.528884	0.475402	0.834956
BLCA	-0.208688	0.0763099	0.210535	0.144762	0.161482	0.017726	0.000684835	0.336018	0.000414486	0.0246966	0.00807161	0.960421
BRCA	0.0325285	-0.0760974	0.19306	0.123436	0.252931	0.175794	0.566214	0.0783417	2.58904e-08	0.0008265	4.85553e-14	1.92791e-06
BRCA-Basal	-0.055979	0.168859	0.222022	0.342022	0.126376	-0.00654803	0.69423	0.100191	0.0157845	6.9713e-05	0.194456	0.963648
BRCA-Her2	-0.167124	-0.113166	0.0646545	0.283495	0.205665	0.166874	0.398125	0.57622	0.73378	0.0557015	0.173659	0.409868
BRCA-LumA	0.00230244	-0.111051	0.235018	0.119201	0.310345	0.314351	0.982922	0.0594516	1.42637e-06	0.0276036	2.86906e-11	3.03947e-11
BRCA-LumB	0.0339885	-0.143557	0.0189814	0.0407231	0.201716	0.224522	0.798051	0.160763	0.884508	0.704053	0.0179305	0.0208314
CESC	-0.130412	-0.0582405	-0.0959491	0.0538781	0.00285767	0.0042785	0.130479	0.567394	0.246839	0.577869	0.971957	0.963648
CHOL	0.224387	-0.162819	0.376606	0.471613	0.439575	0.246312	0.446605	0.583238	0.0866873	0.020563	0.0274619	0.399452
COAD	-0.0767347	-0.018746	0.285854	0.347275	0.247539	0.278347	0.454374	0.891371	2.50045e-05	1.44222e-07	0.000233614	6.60003e-05
DLBC	0.104118	0.0586871	-0.150398	-0.19598	0.211848	-0.20773	0.735531	0.860567	0.535297	0.400976	0.301149	0.474273
ESCA	-0.254812	-0.192626	0.0675082	0.217379	0.0172956	0.222296	0.00490987	0.0529397	0.549272	0.0172259	0.882459	0.0269519
GBM	-0.0453007	0.0168884	0.0820385	0.0973733	0.125173	0.225099	0.787555	0.927117	0.525972	0.440097	0.255879	0.0687976
HNSC	0.208923	-0.293651	0.254809	0.192881	0.155886	-0.169912	4.92256e-05	6.41291e-09	2.63962e-07	0.000204952	0.00273769	0.00243119
HNSC-HPV-	0.213621	-0.223929	0.198813	0.148168	0.0918654	-0.122637	0.000223735	0.000203008	0.000520337	0.0155697	0.144436	0.0965371
HNSC-HPV+	0.192084	-0.323776	0.236263	0.183158	0.295581	-0.19973	0.230116	0.0186799	0.0866873	0.200821	0.0176776	0.22622
KICH	0.237243	-0.00389364	0.0915935	0.237312	-0.0267821	0.0623192	0.197889	0.98958	0.641261	0.151196	0.892064	0.9063
KIRC	-0.147438	0.0404738	0.0653644	0.217953	0.132261	0.24811	0.0112609	0.618681	0.319163	5.41788e-05	0.0164718	2.69454e-06
KIRP	0.230162	0.189452	0.291718	0.253085	0.0727727	0.308453	0.00182951	0.0199079	2.87644e-05	0.000399339	0.376306	1.14771e-05
LGG	-0.103134	-0.0693375	0.0327558	-0.144239	-0.102429	-0.112172	0.110548	0.309243	0.641261	0.00904351	0.0687726	0.0965371
LIHC	0.323877	0.170911	0.23677	0.429092	0.282871	0.269428	3.34144e-08	0.0146331	0.0001033	3.93274e-15	1.23592e-06	1.12463e-05
LUAD	-0.0290883	0.0498641	0.128553	0.173446	0.0659062	0.186044	0.736653	0.512264	0.0202396	0.000918892	0.255537	0.000613482
LUSC	-0.0927869	-0.0442342	0.10571	0.196535	0.00455927	0.0872682	0.162572	0.567394	0.0754425	0.000197294	0.951003	0.222669
MESO	-0.0877769	-0.137066	0.0151357	0.0228937	0.0995284	-0.183745	0.666923	0.441558	0.936444	0.891233	0.498576	0.294164
OV	-0.124265	0.013877	0.082091	0.160005	0.100485	0.157795	0.18114	0.919466	0.364242	0.0433658	0.216398	0.0965371
PAAD	0.00278298	-0.135794	0.0804121	0.294558	0.124154	0.266408	0.983151	0.216327	0.475163	0.000813904	0.207232	0.0060202
PCPG	-0.142427	0.0493075	-0.0297925	-0.0664439	0.013676	0.0572708	0.2191	0.758149	0.819297	0.595612	0.910852	0.746472
PRAD	0.110154	0.267281	-0.0967767	0.211752	-0.0556809	0.197328	0.112062	2.43534e-06	0.138702	0.000176212	0.388651	0.000865006
READ	-0.078133	0.0201091	0.0967363	0.31442	0.178665	0.0916083	0.69423	0.930726	0.549272	0.0140214	0.189073	0.717945
SARC	0.231696	0.00136022	0.110554	0.111	-0.101666	0.0373576	0.00241666	0.991	0.204407	0.200134	0.216398	0.865656
SKCM	-0.08678	0.0400368	0.0334711	0.0622793	0.00582035	0.192794	0.213861	0.622351	0.641261	0.345134	0.940432	0.000613482
SKCM-Metastasis	-0.0526421	0.0939301	0.132149	0.150321	0.0334153	0.286645	0.582317	0.218178	0.0503088	0.0217542	0.654067	2.40498e-06
SKCM-Primary	-0.229087	0.0236094	-0.121316	-0.00832997	0.0216339	0.21185	0.0971145	0.916075	0.39046	0.952932	0.891532	0.158785
STAD	-0.0498353	-0.0386842	0.188944	0.210339	0.182681	0.107434	0.58809	0.688916	0.00150029	0.000383929	0.00194721	0.161806
TGCT	-0.0843581	0.193933	-0.244101	0.0591162	0.090713	0.106852	0.571691	0.0842631	0.0146184	0.645278	0.405701	0.477606
THCA	-0.271546	0.0898794	-0.0322152	0.734844	-0.223921	0.502262	4.59659e-08	0.160763	0.641261	2.2009e-81	6.57493e-06	3.57796e-30
THYM	-0.193031	-0.392039	-0.373431	-0.419115	0.186154	-0.204239	0.152939	0.000421245	0.000358797	6.23472e-05	0.109559	0.152342
UCEC	0.123086	0.195991	0.1383	0.429519	0.123105	0.0330761	0.503149	0.200765	0.36541	0.000328053	0.386147	0.96329
UCS	0.077765	-0.109553	0.221557	0.126868	0.138125	0.130777	0.778619	0.669861	0.246839	0.570204	0.457374	0.688434
UVM	-0.123584	-0.000671843	0.117702	-0.0190067	0.0696753	0.0296835	0.542191	0.998543	0.48507	0.921409	0.669903	0.963648

## Sheet: CIBERSORT
	B_cells_naive	B_cells_memory	Plasma_cells	T_cells_CD8	T_cells_CD4_naive	T_cells_CD4_memory_resting	T_cells_CD4_memory_activated	T_cells_follicular_helper	T_cells_regulatory_(Tregs)	T_cells_gamma_delta	NK_cells_resting	NK_cells_activated	Monocytes	Macrophages_M0	Macrophages_M1	Macrophages_M2	Dendritic_cells_resting	Dendritic_cells_activated	Mast_cells_resting	Mast_cells_activated	Eosinophils	Neutrophils	B_cells_naive P	B_cells_memory P	Plasma_cells P	T_cells_CD8 P	T_cells_CD4_naive P	T_cells_CD4_memory_resting P	T_cells_CD4_memory_activated P	T_cells_follicular_helper P	T_cells_regulatory_(Tregs) P	T_cells_gamma_delta P	NK_cells_resting P	NK_cells_activated P	Monocytes P	Macrophages_M0 P	Macrophages_M1 P	Macrophages_M2 P	Dendritic_cells_resting P	Dendritic_cells_activated P	Mast_cells_resting P	Mast_cells_activated P	Eosinophils P	Neutrophils P
GBM	0.141011	0.00496457	-0.0466645	-0.0682793	-0.0450417	0.00326689	0.119361	-0.0808685	0.0211316	0.022167	0.0385529	-0.0986003	0.207952	-0.105471	-0.023915	0.0114937	0.0803887	0.0311101	-0.18129	0.167862	0.118752	0.179026	0.0831273	0.951596	0.568081	0.40325	0.581629	0.968137	0.143011	0.321975	0.796094	0.786336	0.637238	0.22684	0.0101462	0.195937	0.769941	0.888234	0.324864	0.703592	0.0254046	0.0387197	0.145075	0.0273266
LGG	-0.0730057	0.0809944	-0.0354784	0.0120944	0.107351	-0.0453344	-0.0715526	0.0416787	-0.00987259	0.00414881	0.0405004	0.0327195	-0.00213407	0.00921625	0.0143354	-0.0487507	-0.0125546	-0.0564725	-0.0199622	0.0268365	0.0204919	-0.0739336	0.101612	0.0692491	0.426753	0.786502	0.0159088	0.309749	0.108621	0.350424	0.825019	0.925975	0.364223	0.463605	0.961883	0.836482	0.748175	0.274665	0.778587	0.205633	0.654815	0.54778	0.646272	0.0973269
CESC	-0.044359	0.0452611	-0.0854262	-0.150075	-0.0195098	0.0832037	0.0029327	-0.0260723	-0.123686	0.00068794	-0.0975668	-0.105337	-0.052343	0.169774	0.0497135	0.157453	0.114334	-0.0482669	-0.080761	0.0794876	0.080228	-0.0534929	0.450956	0.441794	0.146044	0.0103591	0.740334	0.156865	0.960272	0.657822	0.0349496	0.990677	0.09668	0.0727845	0.373642	0.00367514	0.398155	0.00711977	0.0513672	0.412041	0.169443	0.176292	0.172285	0.363221
LUAD	-0.0610878	0.0806177	-0.129299	-0.0502367	NA	0.11003	0.169952	-0.130404	0.0999847	0.0880702	-0.0124301	-0.105086	-0.047548	0.071232	0.112534	0.100194	0.237151	-0.0801622	0.00538847	0.0433295	-0.0782787	0.0364453	0.172624	0.0716891	0.00377782	0.262193	NA	0.0138297	0.000134245	0.00348797	0.0253691	0.0490444	0.781581	0.0187519	0.288625	0.111648	0.0118007	0.025062	8.03531e-08	0.0733128	0.904333	0.333591	0.0803484	0.416119
COAD	0.0200952	-0.0628362	-0.192663	0.0822076	-0.0755201	-0.0817853	-0.094023	-0.0313541	0.111217	-0.0358326	-0.0839177	0.0348252	-0.0694289	0.0873535	0.156661	0.123147	0.0322908	-0.0369505	0.0812832	-0.0697871	-0.0210249	0.166047	0.736877	0.293005	0.00114794	0.168605	0.206097	0.170811	0.115166	0.600059	0.0621604	0.549006	0.159891	0.560302	0.245181	0.143413	0.00840389	0.0387652	0.589206	0.536602	0.173461	0.242749	0.725185	0.00518272
LAML	0.0256861	0.0374003	0.218444	0.0945741	-0.00332609	0.162422	0.0799082	0.133927	0.236071	-0.0808726	0.190243	0.0555899	-0.180055	-0.0313293	0.144537	-0.0417748	-0.0444558	-0.0493434	-0.0885045	0.188	0.133345	-0.00969299	0.755839	0.650662	0.00744191	0.251268	0.967887	0.0478073	0.332675	0.103448	0.00375041	0.326855	0.0201295	0.500714	0.0279968	0.704469	0.0786311	0.61296	0.590337	0.550104	0.283117	0.0216747	0.10497	0.906603
BRCA	0.0157347	-0.00950014	-0.0727691	-0.0323379	-0.0654332	0.0730166	0.0833578	0.0235648	0.11507	0.0459161	-0.0516952	-0.0238181	-0.0974492	0.0815195	0.0954721	-0.0101492	0.0488121	0.0615581	0.050683	-0.0354502	-0.0788905	0.135786	0.605988	0.755483	0.0169171	0.289008	0.0317794	0.0165456	0.00619653	0.439788	0.000153995	0.132092	0.0899465	0.434885	0.00136492	0.0074367	0.0017086	0.739364	0.109379	0.0434078	0.0964257	0.24507	0.00959665	7.75926e-06
ESCA	-0.255046	-0.0325693	-0.290321	-0.0457465	-0.0230052	-0.175164	0.18269	-0.0530674	-0.251109	-0.0615989	0.143489	-0.0137485	-0.238537	0.310467	0.233772	0.156294	0.222058	-0.0926081	-0.0237499	-0.0276335	0.0209301	-0.119382	0.000530216	0.663377	7.35355e-05	0.54086	0.758539	0.0183476	0.013833	0.478013	0.000650291	0.410071	0.0539734	0.854253	0.00122171	2.10407e-05	0.00153866	0.0356343	0.00266114	0.214994	0.750976	0.71193	0.779735	0.109438
SARC	0.135589	-0.0226262	0.0781901	0.102139	-0.0704311	-0.0595818	0.0923678	0.146892	0.0795994	0.089197	-0.0320814	-0.0847183	-0.218074	0.160636	0.0879013	-0.13094	0.0932715	0.0083396	-0.0934014	0.0851076	-0.114619	0.00546003	0.0294524	0.717567	0.210666	0.101648	0.259659	0.340476	0.138978	0.0182357	0.202532	0.153117	0.607998	0.174905	0.000418185	0.00975299	0.159198	0.0355479	0.135137	0.893952	0.134592	0.172925	0.0660353	0.930452
KIRP	0.26044	-0.134242	0.0366063	0.153799	0.0676273	0.0260003	0.187453	0.0835369	0.168614	-0.0180537	0.00667574	-0.0715029	-0.121938	-0.118594	0.237632	-0.150692	0.153736	0.0494198	-4.99866e-05	-0.000874302	-0.0431101	0.10401	8.40786e-06	0.0234167	0.538241	0.00930878	0.255135	0.662053	0.00147841	0.159568	0.00431061	0.761534	0.910661	0.228843	0.0396678	0.0454614	5.07269e-05	0.0108541	0.00933804	0.405892	0.99933	0.988275	0.468501	0.079614
STAD	-0.138672	-0.117833	-0.120088	0.0992067	0.0812175	-0.150921	0.16391	0.0259088	-0.0207194	0.00619374	0.0425844	0.0576727	-0.0274942	0.0728147	0.271814	0.185967	0.0790508	-0.0814085	-0.169687	0.070329	-0.00103887	0.0844881	0.00622037	0.0202516	0.0179625	0.0508599	0.110204	0.00287964	0.00119457	0.610905	0.684116	0.903208	0.40288	0.257089	0.589246	0.152271	5.34061e-08	0.000230072	0.120058	0.109367	0.000790723	0.166799	0.983726	0.0965478
PRAD	0.17215	0.0514637	-0.124175	-0.0114561	-0.0480938	0.115247	-0.0329021	0.0380718	0.183742	-0.043221	-0.0553167	0.00987682	-0.208756	0.0876546	0.0736305	-0.0496723	0.0889073	0.0486656	-0.160968	-0.0849182	0.0146434	-0.0522723	0.000118513	0.253098	0.00566713	0.799305	0.285551	0.0102834	0.465163	0.397995	3.90986e-05	0.337244	0.219241	0.826498	2.80648e-06	0.0512936	0.101786	0.270016	0.0480441	0.279855	0.000323489	0.0590333	0.745189	0.245707
UCEC	0.308843	-0.383458	-0.0335794	0.282391	-0.0521022	0.0575014	0.240942	0.0867721	-0.0888999	0.0836371	-0.0568555	-0.205543	-0.121813	-0.104032	0.361624	-0.104257	0.0760409	-0.0880912	-0.0871679	-0.0111028	-0.143662	0.0570579	2.73532e-05	1.26883e-07	0.656339	0.000133971	0.489753	0.445827	0.00119618	0.249444	0.237979	0.267024	0.450962	0.0059157	0.105281	0.166993	7.06551e-07	0.16607	0.313058	0.242292	0.247282	0.883061	0.0557325	0.449349
HNSC	-0.156168	-0.114519	-0.150375	-0.274495	0.0892615	0.0799727	-0.161361	-0.21513	-0.152631	-0.0015806	0.0523452	-0.0922973	-0.213605	0.314066	0.0175915	0.159051	0.100785	-0.062225	-0.00281961	0.0624886	0.118146	0.0636491	0.000364981	0.00915618	0.000602645	2.1729e-10	0.0424854	0.0692324	0.000229375	7.90704e-07	0.000496751	0.9714	0.234779	0.0359031	9.49661e-07	2.67947e-13	0.689855	0.000282507	0.0219114	0.157716	0.949005	0.15596	0.00716064	0.148404
KIRC	0.163939	-0.0126957	-0.0271365	0.0098694	-0.00665345	0.0170461	0.142041	0.0629112	0.104033	0.0125004	-0.154456	-0.0509159	-0.255899	0.158861	-0.0190159	0.0744223	0.0610254	-0.0599856	-0.178085	0.103047	0.00318344	0.128705	0.000154493	0.771016	0.53382	0.821007	0.878774	0.695952	0.00106513	0.148853	0.0167874	0.774444	0.00036789	0.24283	2.43448e-09	0.000247349	0.662869	0.08756	0.161442	0.168717	3.86638e-05	0.0178589	0.941825	0.0030492
LUSC	0.0498714	-0.0908483	0.069613	-0.216129	0.0223511	0.230322	-0.0176381	-0.287326	0.0414013	-0.0543611	0.127637	-0.218389	-0.159251	0.253349	-0.0557141	0.0234113	0.00149841	-0.0645909	-0.0530582	0.124178	-0.0691843	0.0759827	0.270051	0.0442099	0.123448	1.33718e-06	0.621259	2.46792e-07	0.696633	8.71084e-11	0.359958	0.229217	0.00461674	1.02933e-06	0.000396486	1.25067e-08	0.217817	0.604801	0.97358	0.15298	0.240587	0.00586445	0.125782	0.0926065
THYM	0.27582	0.0632683	0.165534	-0.04876	-0.458651	0.372969	0.0319687	-0.254662	-0.309364	NA	0.0630868	0.140706	0.0766251	0.169075	0.310671	0.330728	-0.116884	0.181078	0.0278862	0.138676	0.165383	0.0196887	0.00250163	0.496102	0.0732288	0.60004	1.75905e-07	3.19001e-05	0.731102	0.00538719	0.000652485	NA	0.497341	0.12857	0.409534	0.0672093	0.00061716	0.000254313	0.207492	0.0497242	0.764364	0.134233	0.0734956	0.832406
LIHC	0.132027	0.0166585	0.21555	0.0828003	-0.143893	0.00412005	0.0986901	0.138847	0.265082	-0.0433142	-0.205633	-0.0466208	-0.259057	0.19768	0.122598	-0.175809	0.12868	0.0195114	-0.267361	0.015548	-0.0888144	0.121603	0.0118089	0.751764	3.45197e-05	0.115298	0.00602573	0.937647	0.0603262	0.00807038	2.97479e-07	0.41063	7.92763e-05	0.375799	5.60502e-07	0.000150169	0.0194614	0.000767372	0.0141499	0.711014	2.33129e-07	0.767822	0.0910958	0.0204789
THCA	0.189778	0.0326342	0.120077	-0.253049	-0.0820555	0.0837258	0.0662528	-0.0629756	0.306377	0.112388	-0.337514	-0.0483573	-0.166662	0.137461	0.116588	0.0360415	0.532986	0.19869	0.0131823	-0.131825	-0.268147	0.0343212	1.8299e-05	0.465217	0.0070157	8.65847e-09	0.0659394	0.0606007	0.137854	0.158457	2.15859e-12	0.0116583	7.23658e-15	0.279041	0.000173456	0.00200197	0.00886509	0.41991	2.93395e-38	7.12549e-06	0.768052	0.00305537	9.88772e-10	0.442454
MESO	0.0036617	-0.0863439	-0.0127747	-0.000986916	NA	-0.28361	-0.26736	0.139614	-0.0894867	0.215068	-0.0271735	-0.0597426	-0.094482	0.204422	-0.293354	0.0559904	0.054442	-0.110951	-0.00716241	-0.00872469	-0.0148797	0.0851202	0.973468	0.432024	0.907623	0.992848	NA	0.00853129	0.0133739	0.202531	0.415389	0.0480792	0.805014	0.58704	0.389729	0.0605677	0.00643458	0.610779	0.620694	0.312065	0.948128	0.936835	0.892485	0.438602
READ	-0.0321654	-0.105042	-0.155106	0.0217563	-0.143243	-0.201689	-0.0997503	-0.0401446	0.045623	-0.180589	0.147198	-0.168893	-0.125747	0.219446	0.188898	0.162161	0.117309	-0.218386	-0.0789446	0.0545064	-0.132506	0.0181538	0.762138	0.32172	0.142088	0.837809	0.175557	0.05522	0.346832	0.705569	0.667615	0.0867111	0.163812	0.109512	0.234956	0.036619	0.0729347	0.124609	0.268113	0.0375581	0.456976	0.607845	0.21054	0.864384
SKCM	-0.0168397	-0.102419	-0.0306355	0.111716	-0.0788355	-0.00818851	0.00784833	0.0482842	0.134005	-0.0448464	-0.124389	0.0876363	0.0172857	-0.0892775	0.146705	0.0128374	0.164068	0.0324845	0.0329502	-0.0129633	-0.0475497	0.0855455	0.721054	0.0294684	0.515907	0.0175021	0.0941246	0.862171	0.867844	0.305698	0.00431752	0.341459	0.00810874	0.0626598	0.713986	0.0578811	0.00176421	0.785482	0.00046137	0.490887	0.484689	0.78343	0.313122	0.0692143
PAAD	-0.150437	0.133752	-0.136559	-0.301519	0.0434634	-0.149255	-0.0414703	-0.127896	0.199924	-0.0958922	0.0357008	-0.098472	-0.14693	0.422667	0.00689546	0.252694	0.0172974	0.139445	-0.126901	-0.0183604	-0.0286547	0.145562	0.0456463	0.0759267	0.0699212	4.53572e-05	0.565685	0.0473946	0.583655	0.0897984	0.00763139	0.204209	0.637103	0.192242	0.050994	4.61878e-09	0.927422	0.00069056	0.819247	0.0641543	0.0923441	0.808347	0.704983	0.0532159
OV	0.225715	-0.236972	0.126361	0.16702	-0.141672	0.304314	0.152102	-0.176088	0.00904317	-0.0807984	-0.0155281	-0.00384098	-0.110334	-0.0681547	0.286044	0.10538	0.137306	-0.136786	-0.184953	0.161939	-0.133492	0.217661	3.31945e-06	1.01578e-06	0.00988371	0.000625399	0.00378578	2.31107e-10	0.00186416	0.000307452	0.854097	0.0998246	0.752171	0.937744	0.0244184	0.165284	2.82924e-09	0.0316458	0.00502593	0.00519545	0.000148396	0.000916779	0.00639655	7.46799e-06
TGCT	0.0399688	-0.135113	0.100169	-0.12197	-0.105966	0.0236915	-0.0292643	-0.0759576	0.0534319	-0.0355795	-0.190772	-0.0632605	-0.00286199	0.0647064	0.0123556	0.151575	0.0992063	0.030185	0.0349651	0.0326493	NA	-0.141585	0.649094	0.122428	0.253126	0.163557	0.226554	0.787435	0.739063	0.386689	0.542868	0.685464	0.0284434	0.471145	0.974018	0.461048	0.888177	0.0827517	0.257741	0.731163	0.690616	0.710158	NA	0.105364
PCPG	0.0100785	-0.0284103	0.0274882	0.0453393	NA	-0.0130837	0.0596468	0.214252	-0.0896609	NA	0.176893	-0.0671805	-0.112666	-0.0640054	0.08374	-0.120881	0.0436765	-0.135959	0.0163905	-0.0477595	-0.0252049	0.0827854	0.894084	0.707383	0.716467	0.549017	NA	0.862776	0.430329	0.00418898	0.235306	NA	0.018506	0.374298	0.135421	0.397345	0.2678	0.109	0.56378	0.0711701	0.828574	0.527872	0.739129	0.273313
UVM	-0.0415908	0.0481098	0.0495575	0.177923	-0.122999	0.0748181	-0.0312185	0.133231	-0.133773	-0.16624	-0.100057	0.157609	0.0664489	-0.316359	0.130241	0.053357	0.069941	0.154888	-0.125611	0.00301005	-0.111972	0.112556	0.715908	0.673727	0.66449	0.116706	0.280178	0.512263	0.784761	0.241787	0.23986	0.14313	0.380293	0.165375	0.560674	0.004506	0.252608	0.640485	0.540213	0.17289	0.270011	0.978996	0.325872	0.323342
UCS	0.0154205	-0.0323685	0.104204	0.0247881	0.127217	0.107719	0.0363632	0.306439	0.0522889	-0.0482764	-0.234542	0.179783	-0.0660664	-0.0655387	0.299699	-0.181924	0.249759	-0.0324844	-0.102051	-0.00976714	-0.0426	0.131084	0.910189	0.812794	0.444698	0.8561	0.350131	0.429402	0.790187	0.0216175	0.701919	0.723845	0.0818719	0.184885	0.628546	0.631297	0.0248314	0.179623	0.0633949	0.812136	0.454209	0.943045	0.755238	0.335555
BLCA	0.293364	-0.239041	0.0334685	-0.0653364	-0.1116	0.0559948	0.192626	-0.134897	-0.111803	-0.0681945	-0.00789154	-0.0148195	-0.222879	0.297799	0.289151	0.170027	0.029022	-0.28612	0.020312	-0.0365554	-0.175731	0.0793334	1.76013e-09	1.13606e-06	0.501808	0.18945	0.0247054	0.260898	9.57426e-05	0.00655194	0.0244422	0.170768	0.8742	0.766214	5.93822e-06	9.7269e-10	3.0632e-09	0.000589933	0.560314	4.53815e-09	0.683604	0.463171	0.000380458	0.110906
ACC	-0.0156106	0.140468	-0.111326	0.0636148	-0.0475999	0.0067155	0.0220045	0.0942424	0.138894	0.00627729	0.01254	0.116441	-0.0363249	0.0739214	0.0920066	-0.224224	-0.0913365	0.12647	-0.0602529	-0.0610776	0.165385	-0.000230172	0.892809	0.223038	0.335096	0.582563	0.681007	0.953776	0.849346	0.414921	0.228319	0.95679	0.913804	0.313219	0.753795	0.522873	0.426126	0.0499475	0.429517	0.273067	0.602685	0.597721	0.150596	0.998415
KICH	-0.0352434	-0.0386696	-0.266797	-0.0578556	-0.122737	0.0545547	-0.140329	0.105959	0.254012	0.0482719	-0.139052	0.1347	-0.137769	0.294137	0.0953556	-0.124859	0.266663	-0.0972997	0.109619	-0.0456277	0.116535	-0.260969	0.780464	0.759734	0.0316853	0.647111	0.330043	0.666017	0.264876	0.400875	0.041172	0.702571	0.269292	0.284708	0.273775	0.0173942	0.449896	0.321686	0.0317747	0.440667	0.384711	0.718165	0.355247	0.035754
CHOL	-0.108695	0.148351	-0.106652	0.0505954	-0.108619	0.0430918	0.0773359	0.0575475	0.0305196	NA	-0.087153	0.00193125	0.126365	-0.131017	0.154654	0.1187	0.295888	-0.0010157	-0.0154112	0.210249	0.132464	-0.239763	0.528021	0.387872	0.53585	0.769486	0.528312	0.802942	0.653928	0.738851	0.859747	NA	0.613259	0.991081	0.462713	0.446269	0.367796	0.490504	0.0797489	0.995309	0.928916	0.218402	0.441219	0.158998
DLBC	-0.146675	-0.174738	0.131207	0.0148608	NA	-0.102826	0.036668	0.433997	0.423804	0.107393	-0.30681	0.0697607	-0.135192	0.00359247	-0.0591955	0.0899698	-0.140925	0.257299	-0.0907396	0.231117	0.231117	0.0225733	0.330705	0.245447	0.384758	0.921915	NA	0.496497	0.808833	0.00258356	0.00333569	0.477465	0.0380858	0.645028	0.370359	0.981096	0.695962	0.552098	0.350218	0.0843011	0.548687	0.122255	0.122255	0.881628

## Sheet: immune-related genes
	BTLA	CD200	TNFRSF14	NRP1	LAIR1	TNFSF4	CD244	LAG3	ICOS	CD40LG	CTLA4	CD48	CD28	CD200R1	HAVCR2	ADORA2A	CD276	KIR3DL1	CD80	PDCD1	LGALS9	CD160	TNFSF14	IDO2	ICOSLG	TMIGD2	VTCN1	IDO1	PDCD1LG2	HHLA2	TNFSF18	BTNL2	CD70	TNFSF9	TNFRSF8	CD27	TNFRSF25	VSIR	TNFRSF4	CD40	TNFRSF18	TNFSF15	TIGIT	CD274	CD86	CD44	TNFRSF9	BTLA P	CD200 P
ACC	-0.00670276	-0.153371	0.24545	0.217836	0.0715184	0.02061	-0.0090508	0.460642	0.222012	-0.0735947	0.161073	0.0728976	0.00621624	-0.0167609	0.0513257	-0.106545	0.101483	0.146414	0.28207	0.141259	0.00191952	0.255322	0.0583856	0.166893	0.179014	0.132076	-0.0153868	0.357813	0.19941	0.223126	-0.0480201	-0.117421	0.798002	0.456423	0.28671	0.133378	0.205361	-0.0372611	-0.19132	0.142728	0.359374	0.00212549	0.342485	0.265685	0.087977	0.113468	0.118983	0.95325	0.17719
BLCA	0.0326607	0.0529468	-0.160901	0.0444698	0.132521	0.270184	0.0773181	0.146428	0.0837187	-0.00242787	0.117144	0.0788372	0.0624307	0.00355505	0.182397	0.0492016	0.217481	0.0634776	0.0889692	0.098233	-0.103592	-0.0983383	0.0741822	0.00906501	-0.0449359	-0.0432629	0.10712	0.103676	0.266914	-0.0454711	-0.0650476	-0.0845389	0.177444	0.265804	0.163202	0.101062	0.000179691	-0.00202761	0.151462	-0.0840906	0.198546	-0.12934	0.107096	0.153587	0.157053	0.185543	0.183627	0.512192	0.287788
BRCA	0.05615	0.113639	-0.0180387	0.096901	0.149135	0.471919	0.0354502	0.096927	0.138773	0.056779	0.164114	0.116673	0.0876272	0.060529	0.215098	-0.00757824	0.202064	0.0404499	0.197276	0.0814153	0.158942	-0.0872688	0.0707543	0.00285331	-0.00968009	0.0435731	0.0690006	0.129752	0.19855	0.0393481	0.0526304	-0.0236627	0.227395	0.296617	0.0988788	0.112139	0.0180113	0.0652298	0.153976	0.134481	0.00351163	0.0664454	0.137635	0.166212	0.192827	-0.00166178	0.201789	0.0661013	0.000192655
CESC	-0.128738	0.00991066	-0.299179	0.159827	0.00380101	0.149441	-0.144388	-0.0893416	-0.0969452	-0.118042	-0.0888227	-0.114121	-0.0811236	0.00329709	0.00357695	-0.0559849	0.090394	-0.00720234	0.0132425	-0.0856962	-0.262129	-0.196592	-0.0918603	-0.139799	-0.0280586	-0.268353	-0.0853925	-0.150908	0.00666148	-0.0924382	-0.091536	-0.11296	0.271828	0.279905	0.106408	-0.145306	-0.0438068	-0.0625357	-0.10406	-0.0477935	-0.0879037	-0.180558	-0.116567	-0.024308	0.00129957	0.146066	0.0156667	0.0267782	0.865174
CHOL	0.0629372	0.342271	0.0890895	0.222896	0.314333	0.315985	0.117866	0.0401217	0.0656643	0.0401372	0.127965	0.114456	0.107306	0.10708	0.325902	-0.0741143	0.00191475	0.0932203	0.217047	-0.00402801	0.0727677	-0.217187	-0.302283	-0.0455948	-0.0071427	0.0535321	-0.15121	0.128065	0.239487	0.066001	0.606901	-0.0656162	0.292376	0.272297	0.0669637	0.190104	-0.00304375	0.204297	0.103713	0.119348	0.0675837	-0.218259	0.135285	0.143359	0.272354	0.360217	0.21313	0.715367	0.0410201
COAD	0.0282979	0.119517	-0.0206052	0.212459	0.242566	0.181385	0.0939681	0.162674	0.0447591	-0.0836233	0.0997413	0.168076	0.0638521	0.0542545	0.261109	0.00669498	0.247871	0.102384	0.134482	0.116789	-0.0680769	-0.106633	0.150993	0.0576549	-0.035718	-0.0706472	0.0746661	0.0832509	0.219254	-0.063425	0.0622502	0.0354414	0.36642	0.41793	0.167217	0.118694	-0.208589	0.211061	0.105635	0.045409	0.167089	0.0482501	0.132047	0.148304	0.238662	0.0797117	0.174174	0.548011	0.0109006
DLBC	0.183125	0.157434	-0.0633661	-0.0401922	-0.0452609	0.209243	0.0197003	0.205697	0.561247	0.338487	0.511736	0.0509902	0.368616	0.225837	0.129236	0.173754	0.123024	0.191716	0.467079	0.137446	0.041934	0.265394	0.374061	0.182547	0.00569712	0.388351	-0.136282	0.0456993	0.106285	0.0435428	-0.126787	0.237683	-0.112225	-0.215865	0.188269	0.280494	0.346429	0.242033	0.417181	0.204182	0.397867	0.194942	0.25864	-0.00227971	0.550892	-0.129376	-0.00140115	0.217916	0.290577
ESCA	-0.141999	-0.284963	-0.364595	-0.0696692	-0.0303358	-0.0196192	0.114837	0.0987886	-0.00124509	-0.190289	-0.0519951	-0.140919	-0.110286	0.00744989	0.0213115	-0.216507	0.103454	0.030049	0.00420018	-0.0751189	-0.429702	-0.173834	0.120385	-0.101474	-0.110574	-0.167151	-0.0646696	-0.0546503	0.177656	-0.327091	0.00632755	-0.0201607	0.0257869	0.193493	0.0857945	-0.194179	0.294435	-0.0797201	-0.101836	0.0903303	0.185444	-0.436855	-0.0385982	0.151078	0.103798	0.390852	0.0392899	0.0809695	0.000373231
GBM	-0.0642928	-0.136083	0.12056	0.15614	0.139285	0.162267	0.107718	-0.082618	-0.008894	-0.0218405	-0.0409148	0.0725879	-0.026298	0.0773539	0.124112	-0.193264	0.0779461	0.0192575	0.0651577	0.0293691	0.0399848	-0.0342256	0.0881703	-0.0648483	-0.0474262	-0.038195	-0.204289	0.012282	0.30067	-0.0288426	0.0374335	-0.114268	0.223581	0.249229	-0.00880049	-0.0224662	-0.00488843	0.120812	-0.125684	0.0856888	0.0760342	0.085154	-0.077672	0.317537	0.167097	0.250521	0.176524	0.443925	0.103878
HNSC	-0.212205	-0.203989	-0.291946	0.0487233	-0.161145	-0.0686163	-0.092075	-0.210525	-0.131018	-0.211604	-0.159264	-0.214485	-0.181566	-0.226209	-0.156558	-0.285621	0.0931022	-0.145176	-0.0746835	-0.255557	-0.340715	-0.184713	0.0435718	-0.158456	-0.200135	-0.226928	-0.105107	-0.180154	0.0811522	-0.0928158	-0.0971205	-0.0803157	0.0196983	0.203937	-0.0257749	-0.257119	-0.0271156	-0.13166	-0.195441	-0.266535	-0.149808	-0.302505	-0.224011	-0.0491262	-0.0972505	0.175089	-0.173745	1.9008e-06	4.75803e-06
KICH	-0.0985326	0.108065	0.0824076	-0.260117	0.0264915	-0.0838383	0.00652573	0.0376784	0.127391	0.116021	0.025721	-0.0181562	-0.030575	0.030547	0.117807	-0.112261	0.265834	0.0133233	0.0909248	0.0743057	-0.00623934	-0.0670084	0.0632874	0.0200831	-0.163325	0.112245	-0.0346302	-0.072495	-0.0675537	0.0812837	0.102237	-0.0839016	-0.0574287	-0.0567999	0.0239885	0.0353017	-0.175807	-0.155594	-0.0201384	0.0902249	0.174332	0.192231	0.040694	-0.0898998	0.0587175	0.299253	-0.0563752	0.434871	0.391525
KIRC	0.124657	0.00940631	-0.11445	0.020271	0.143556	0.246599	0.0195727	0.148937	0.0984345	0.107	0.1364	0.0239653	0.14128	0.0803544	-0.0922348	-0.0963712	0.261637	-0.117084	0.174717	0.0971182	0.134546	0.0285389	0.0622734	0.0772548	0.07371	0.127475	-0.0852249	-0.0106119	0.123674	-0.132232	0.121888	0.00312758	0.208348	0.179171	0.0998368	0.128874	0.0614258	-0.0254113	0.0179857	0.0266131	0.241579	0.00362367	0.128256	0.0250397	0.0768663	0.368285	0.0910415	0.00419193	0.829594
KIRP	0.348416	-0.027198	-0.191915	0.158198	0.164111	0.303703	0.151863	0.253823	0.274827	0.209841	0.293291	0.139628	0.110629	0.204782	-0.100085	0.140674	0.0699504	0.00993313	0.22274	0.280846	0.135765	0.208715	0.096665	0.0863869	0.0702817	0.210928	-0.0952981	0.224433	0.384708	-0.198645	0.136296	0.0333652	0.172362	0.191446	0.378415	0.264194	0.0784682	0.121508	0.33444	0.0977982	0.27061	0.0989693	0.340569	0.0901531	0.163082	0.311359	0.265995	1.2954e-09	0.64635
LGG	-0.0213923	-0.0635977	-0.0413619	0.0605075	-0.114497	-0.0626869	-0.070251	0.00766025	-0.0805217	-0.0545213	-0.0667006	-0.0637214	-0.0732005	-0.0645793	-0.14445	-0.0160076	-0.0272284	-0.0445437	-0.0649507	-0.0872007	-0.10868	-0.091045	-0.0336159	-0.015483	-0.011784	-0.0631659	0.0532095	-0.0711458	-0.1193	-0.0429858	-0.0403131	-0.0675874	-0.0519277	0.0104957	-0.0834864	0.00718937	-0.0716298	-0.123295	0.0482802	-0.118701	-0.0266382	-0.0683864	-0.039229	-0.0767871	-0.13856	-0.0597623	0.0173986	0.633217	0.155617
LIHC	0.154907	0.174679	0.124015	0.283689	0.235061	0.0538111	0.114777	0.11556	0.199337	0.122892	0.180669	0.178401	0.0916914	0.17752	0.234943	-0.12997	0.234612	0.0732592	0.163289	0.130851	0.314583	0.0602905	0.0464176	-0.0648164	0.113611	0.0811604	0.278875	0.184521	0.116188	0.405641	0.324147	0.0549027	0.168908	0.256551	0.247183	0.173296	0.114649	0.252908	0.13757	0.0491231	0.175793	0.282513	0.17531	0.134881	0.231751	0.323528	0.100005	0.00284878	0.000751585
LUAD	0.160982	0.286634	0.0751813	0.102892	0.18991	0.468148	0.100479	0.100566	0.269733	0.0961774	0.217253	0.216991	0.260668	0.204519	0.282181	0.0598471	0.206931	-0.0484491	0.294447	0.155011	0.149092	-0.0656361	-0.101941	0.0178861	0.0344887	0.110243	0.0608246	0.146388	0.262354	0.0528111	0.238073	0.0224365	0.260315	0.178042	0.162166	0.176597	0.015808	0.116433	0.203182	0.258652	0.187582	-0.0649471	0.186413	0.153961	0.275745	0.251686	0.316439	0.000261843	4.22049e-11
LUSC	0.0711187	0.0966075	0.039304	0.230178	0.21242	0.395295	0.111431	0.0359035	0.18751	0.0685069	0.146789	0.18109	0.18981	0.027426	0.239085	-0.00145783	0.119464	0.0122292	0.221478	0.0362939	-0.045537	-0.0506269	0.120046	-0.0275152	0.0731934	0.0576963	0.024042	0.0341048	0.163234	0.0316162	-0.00412814	-0.144927	0.00416571	-0.0611	0.0993871	0.197787	-0.148886	0.224188	0.104145	0.138257	0.0480958	-0.0836704	0.101595	-0.0399756	0.246662	0.173713	0.161405	0.113673	0.0314638
MESO	-0.0664314	0.088603	-0.327465	-0.0693154	-0.107431	0.12096	0.0959916	-0.215753	-0.152384	-0.200011	-0.0849619	-0.126354	-0.127616	-0.0851615	-0.0608608	-0.163522	0.44795	-0.0900052	-0.0620468	-0.127054	-0.245269	-0.0070149	0.0300237	-0.170653	0.020354	-0.141395	0.0250653	-0.172738	-0.105031	-0.121	-0.185062	0.316068	0.317822	0.368278	0.156908	-0.120733	-0.0035241	-0.191746	-0.134557	0.0337332	-0.133109	-0.291183	-0.0969334	-0.123653	-0.0888925	0.122924	0.226901	0.555699	0.431527
OV	-0.0720138	-0.0983167	0.0323007	0.323295	0.455185	0.515546	0.336853	0.125811	0.362316	0.275333	0.3451	0.439291	0.351461	0.210487	0.474716	0.156436	0.194515	0.13715	0.379955	0.184657	0.0920815	-0.043343	0.0979504	0.0777458	-0.019302	0.211088	0.073325	0.0964282	0.50606	-0.102026	0.183089	-0.160073	0.222977	0.266251	0.256957	0.285647	-0.148346	0.187816	0.300754	0.183803	0.126704	0.00921918	0.330367	0.176276	0.433605	0.325579	0.407717	0.176409	0.0646379
PAAD	-0.0782968	-0.0711722	0.177638	0.0826769	0.236241	0.654876	-0.131088	-0.0298019	0.0186872	-0.0816682	0.0952755	-0.0212113	-0.037229	-0.0815868	0.343752	-0.149602	0.530385	-0.00785392	0.351622	-0.0313821	0.286223	-0.313236	0.0190453	-0.076659	-0.0398852	-0.0139005	0.034081	-0.0128988	0.266273	0.169212	0.0601867	-0.03172	0.458178	0.422474	0.130014	-0.0033051	0.16162	0.0572544	0.273162	0.240144	0.3221	-0.0400944	0.0246804	0.110098	0.30188	0.250679	0.205208	0.300257	0.346515
PCPG	0.0606347	-0.0772982	-0.190064	0.150222	-0.00180827	-0.0366094	-0.0175121	-0.0585312	0.0170953	0.0328567	0.0997995	0.0733913	-0.0111231	-0.084644	-0.017596	-0.0430495	0.218165	-0.012182	0.0830022	0.0346628	0.0346888	0.014603	0.0826673	0.0660753	-0.120529	-0.0366062	-0.119421	0.0773536	0.107908	-0.161551	0.0324085	-0.00628005	0.0972932	0.0410224	0.183588	0.102345	-0.285302	0.138167	0.0328261	-0.16451	0.058366	-0.0581027	0.130765	0.103734	0.0222724	-0.0997993	0.089409	0.425389	0.309271
PRAD	0.183717	0.132953	-0.00868829	0.114432	0.222212	0.175932	0.0952754	0.0727211	0.198954	0.204445	0.196605	0.184371	0.111421	0.143397	0.247684	0.060813	0.0916663	0.205583	0.366712	0.140076	0.177861	0.0518246	0.115313	0.10055	-0.0100433	0.0898638	-0.0262754	0.137562	0.212764	0.00829727	0.126234	-0.0123291	0.539047	0.142319	0.178484	0.15915	0.103226	0.0753231	0.138387	0.0903602	0.0539264	0.0120241	0.177567	0.12372	0.218933	0.00913364	0.209288	5.05026e-05	0.00348604
READ	0.0671062	0.255995	-0.0239641	0.36369	0.380903	0.329143	0.148796	0.250555	0.189685	-0.0294978	0.155301	0.269388	0.136078	0.185153	0.460616	0.0559721	0.285708	0.128447	0.241427	0.291119	0.0114765	-0.0780615	0.204695	-0.0831474	0.134397	0.031514	0.204976	0.244192	0.388276	-0.186664	0.120174	0.0899522	0.38536	0.377886	0.124596	0.123653	-0.149072	0.096581	0.138619	0.195887	0.140574	-0.0147365	0.211952	0.337325	0.380879	0.10836	0.316937	0.394702	0.000972711
SARC	0.0709244	0.000629721	-0.116958	0.0320501	-0.00491655	0.0770658	-0.0271068	-0.0185425	0.0715978	0.0139768	0.0886548	0.029784	-0.00334315	-0.0398948	0.0293569	-0.0714199	0.119613	-0.0437873	-0.0361839	0.0403198	0.00729276	-0.1153	0.0387909	0.00505989	0.0414737	-0.0108461	-0.0893848	-0.110658	-0.0471165	-0.0605827	0.0162778	-0.0311256	0.0458483	0.0350515	0.0979869	0.0352655	0.100567	-0.0283499	0.0353905	-0.0437942	0.0949566	0.0629501	0.0438097	-0.0530747	0.0120525	-0.0830773	0.143321	0.256328	0.991969
SKCM	0.0324402	0.136246	-0.183258	0.0693745	-0.0230823	-0.0221159	0.0545701	-0.00406981	0.125934	0.196046	0.0150657	-0.0103928	-0.061801	-0.00429777	-0.0139593	-0.0788924	-0.0232195	0.183083	-0.0575714	0.0354531	0.0583761	-0.0830521	0.0751737	0.0956354	0.194358	0.138241	0.372567	0.00283297	-0.0269095	-0.0421079	0.0968117	-0.0705133	0.0721647	0.171667	0.099599	0.0539885	0.390236	0.477101	0.0456519	0.0172751	0.347519	-0.0706603	0.0409836	-0.00840627	-0.0180716	-0.116702	0.0174508	0.744954	0.169978
STAD	-0.0408818	0.0384948	0.000818846	0.099337	0.146334	0.232673	0.11651	0.177377	0.0400768	-0.040797	0.0844166	0.060337	-0.0357041	0.000656556	0.202947	-0.0424199	0.0389354	0.146207	0.11927	0.0338047	-0.00253865	0.0492113	0.0616099	-0.00670792	-0.120457	0.0859263	-0.133772	0.288709	0.178693	-0.0590364	0.0214083	-0.0144983	0.232927	0.310085	0.0691202	-0.0179182	-0.0949763	-0.130771	0.110966	0.0897856	0.114692	-0.073561	0.0540878	0.212887	0.203749	0.0418316	0.140631	0.431143	0.45855
TGCT	-0.119792	-0.0464333	0.0110568	0.0547902	-0.0712345	-0.111862	-0.0774132	-0.10646	-0.118108	-0.055905	-0.0644897	-0.00760586	-0.106623	-0.0673582	-0.0886351	-0.20224	0.0138564	-0.0681183	-0.0936121	-0.0675805	-0.00476944	-0.0729789	-0.106946	-0.0871292	-0.0634724	-0.0470339	0.281373	-0.00516131	-0.036281	0.0436572	-0.111561	0.013468	-0.0999938	-0.104885	-0.100655	-0.0572242	-0.0608687	0.0891559	-0.00186453	-0.0170162	0.0615591	0.0223813	-0.0918633	-0.0724737	-0.0606407	0.143112	-0.0673712	0.145621	0.573898
THCA	0.224865	0.174497	0.0758742	0.115345	0.358639	0.457987	0.190103	0.237233	0.363818	0.247402	0.412244	0.305884	0.342252	0.343502	0.438996	0.0332952	0.614615	0.0389146	0.450907	0.170782	0.486048	0.0431148	0.360988	0.00389402	0.153687	0.178686	0.428962	0.166373	0.345477	0.0242378	0.430764	0.0256438	0.509934	0.471483	0.364973	-0.0708295	0.328962	0.0652885	0.21443	0.364334	0.574209	0.224432	0.338644	0.316824	0.481863	0.102548	0.360547	4.07526e-07	9.2147e-05
THYM	0.0963212	-0.208946	-0.142345	0.133171	-0.335828	-0.155302	-0.306077	0.131524	-0.220937	-0.0316533	0.221475	-0.198056	-0.176698	0.0170108	0.0304797	-0.167778	0.295164	-0.0534955	0.210354	-0.244204	-0.147301	0.0680043	-0.00676196	0.0577378	0.238472	-0.334535	0.193764	0.0615574	0.23777	0.0433561	0.206443	0.183962	0.0855196	0.196529	0.0822274	-0.151648	0.175853	0.0917401	0.0908788	0.0701983	0.15548	0.270056	0.213685	0.209566	0.0902506	0.145553	0.151047	0.297377	0.0225779
UCEC	0.194369	-0.0399028	0.0278536	-0.0207713	0.181542	0.177878	0.203965	0.252183	0.193644	0.0654413	0.21299	0.176614	0.115237	0.0911737	0.195396	0.188715	0.0799018	0.104819	0.151087	0.241683	0.0174005	0.0309823	-0.0126923	0.033551	0.0317143	0.0919947	-0.127335	0.11404	0.252567	-0.119921	0.0584101	-0.0220187	0.122819	0.111375	0.311067	0.20732	-0.0225164	0.169024	0.121742	0.143961	0.0641792	-0.0309554	0.209408	0.231144	0.17361	0.205119	0.183797	5.70551e-06	0.356065
UCS	0.449662	0.17457	0.327653	0.0668988	0.340803	0.489527	0.399286	0.210279	0.389576	0.410821	0.315399	0.263703	0.220853	0.040259	0.333637	0.142207	0.062001	0.103826	0.225238	0.314777	0.224799	0.16334	0.751491	0.83933	0.677615	0.121316	0.150335	0.506775	0.356103	0.147118	0.0958135	-0.0375472	-0.000853406	0.00778634	0.164851	0.421619	0.128377	0.242643	0.120471	0.182969	0.0506851	0.334556	0.43827	0.274675	0.243468	-0.00176348	0.308822	0.000507509	0.198163
UVM	0.721481	0.0748469	0.100461	0.446734	0.387303	0.582932	0.419881	0.376185	0.487963	0.524317	0.362485	0.422042	0.426572	0.573885	0.421023	0.375217	-0.0221799	0.463546	0.491709	0.477927	0.260453	0.842527	0.584405	0.42239	0.401543	0.219787	0.0195517	0.33135	0.487613	0	0.37658	0.271743	0.194619	0.209859	0.35455	0.44186	0.380837	0.472653	0.199029	0.176501	0.397771	0.601913	0.48309	0.34865	0.461862	-0.030266	0.453721	1.34299e-13	0.517668
[truncated: 45 more columns]

## Sheet: ESTIMATEScore
Immu	StromalScoreR	StromalScoreP	ImmuneScoreR	ImmuneScoreP	ESTIMATEScoreR	ESTIMATEScoreP
GBM	0.13378	0.135323	0.125473	0.161534	0.138847	0.121013
LGG	-0.168763	0.00032833	-0.135515	0.00401737	-0.150663	0.00136535
CESC	0.304268	1.53705e-07	0.0250194	0.673515	0.16752	0.00450118
LUAD	0.384814	5.92842e-19	0.247302	2.39545e-08	0.335585	1.60615e-14
COAD	0.392193	1.27818e-11	0.35044	2.0055e-09	0.39511	8.73375e-12
LAML	-0.0388529	0.874522	-0.0132453	0.957081	-0.0874191	0.721942
BRCA	0.438183	9.95567e-51	0.235123	1.02071e-14	0.366333	7.49179e-35
ESCA	0.236636	0.00161677	0.0416662	0.584049	0.151975	0.0446735
STES	0.174631	3.70203e-05	0.08415	0.0481432	0.133081	0.00172699
SARC	0.277704	4.88359e-05	0.12679	0.0680103	0.192593	0.00531953
KIRP	0.17905	0.0155867	0.165992	0.0251244	0.18801	0.0110338
STAD	0.198269	0.000106426	0.152715	0.00295107	0.186655	0.000268198
PRAD	0.15581	0.00408567	0.211407	8.97976e-05	0.206614	0.000130327
UCEC	0.366472	6.74676e-06	0.370012	5.40661e-06	0.414719	2.61022e-07
HNSC	0.188553	1.68472e-05	-0.145346	0.000950528	0.00638515	0.885176
KIRC	0.22042	5.11498e-06	0.122245	0.0121686	0.188677	0.000100159
LUSC	0.459733	6.06627e-27	0.212392	2.14945e-06	0.341948	7.37156e-15
THYM	-0.00325773	0.972071	-0.267086	0.00345875	-0.193729	0.0355542
LIHC	0.237676	0.00123466	0.319533	1.09828e-05	0.307965	2.34414e-05
THCA	0.508872	3.40878e-32	0.441809	8.79935e-24	0.499274	7.13701e-31
MESO	0.153666	0.160287	-0.163633	0.134553	-0.0603289	0.583369
READ	0.479809	1.49154e-06	0.303202	0.00348369	0.441679	1.17225e-05
SKCM	0.197631	0.000109789	0.121503	0.0181165	0.15883	0.00195187
PAAD	0.281635	0.000166723	0.0972604	0.201696	0.1957	0.00965568
OV	0.756205	1.68299e-75	0.481326	1.20642e-24	0.660647	1.23055e-51
TGCT	0.191749	0.0276261	-0.0278736	0.751047	0.0688137	0.433028
PCPG	-0.0156555	0.852773	0.0564475	0.503098	0.017557	0.835131
UVM	0.611119	0.000551203	0.494781	0.00743555	0.544011	0.00276731
UCS	0.330797	0.0425033	0.361128	0.0259105	0.361894	0.0255736
BLCA	0.423414	9.58407e-17	0.18139	0.000627407	0.320861	7.17587e-10
ACC	-0.128736	0.32277	-0.128974	0.321868	-0.126275	0.332183
KICH	-0.0428033	0.790455	-0.158171	0.323299	-0.136025	0.396437
CHOL	0.502216	0.00247353	0.37842	0.0273273	0.460034	0.0061917
DLBC	0.0113866	0.946672	0.0735381	0.665343	0.0770964	0.65016

## Sheet: TMB
CancerType	cor	pValue	sig
ACC	0.123535	0.27807
BLCA	0.01517	0.76085
BRCA	0.0277971	0.387893
CESC	-0.0258212	0.667043
CHOL	-0.320366	0.0567922
COAD	0.191735	0.000133703	***
DLBC	-0.406954	0.0137697	*
ESCA	-0.125588	0.12441
GBM	0.0319545	0.710872
HNSC	-0.128726	0.00443731	**
KICH	0.0958455	0.44756
KIRC	-0.0351869	0.524777
KIRP	-0.10124	0.0926328
LGG	-0.0756189	0.094184
LIHC	-0.084365	0.111043
LUAD	-0.0985607	0.0275429	*
LUSC	-0.15289	0.000748318	***
MESO	-0.0157191	0.894251
OV	0.100356	0.106424
PAAD	0.073328	0.370901
PCPG	0.120288	0.113874
PRAD	0.0272303	0.556791
READ	-0.01786	0.840783
SARC	-0.162794	0.0128391	*
SKCM	-0.17106	0.0840529
STAD	0.0285655	0.585938
TGCT	0.00827415	0.921594
THCA	-0.0605567	0.186728
THYM	0.309567	0.000682888	***
UCEC	0.217718	5.35731e-07	***
UCS	-0.131388	0.334429
UVM	-0.253364	0.0261948	*

## Sheet: MSI
CancerType	cor	pValue	sig
ACC	-0.0287032	0.801733
BLCA	0.0460251	0.355557
BRCA	0.0123592	0.693108
CESC	-0.0651797	0.265269
CHOL	-0.316088	0.060829
COAD	0.199311	3.64986e-05	***
DLBC	0.0599208	0.689087
ESCA	-0.0696444	0.395478
GBM	0.129044	0.128627
HNSC	-0.0117311	0.795411
KICH	-0.0639752	0.612649
KIRC	-0.186681	0.000629053	***
KIRP	-0.0733942	0.21755
LGG	0.0505348	0.26081
LIHC	-0.0370974	0.47803
LUAD	-0.0577969	0.193411
LUSC	-0.176815	8.60343e-05	***
MESO	0.102303	0.375971
OV	-0.0836975	0.177642
PAAD	-0.0237879	0.75468
PCPG	-0.0655942	0.388445
PRAD	0.0335611	0.462739
READ	0.0903135	0.273353
SARC	-0.0158154	0.802719
SKCM	-0.173373	0.0798841
STAD	0.0575264	0.268419
TGCT	-0.0542461	0.511139
THCA	0.0554797	0.222138
THYM	0.0175639	0.850269
UCEC	0.12869	0.002916	**
UCS	-0.144709	0.287286
UVM	-0.0808968	0.4843

## Sheet: GSEA KEGG
ID	Description	setSize	enrichmentScore	NES	pvalue	p.adjust	qvalues	rank	leading_edge	core_enrichment	cancer
KEGG_CYTOSOLIC_DNA_SENSING_PATHWAY	KEGG_CYTOSOLIC_DNA_SENSING_PATHWAY	54	0.625341	1.54026	0.0333333	1	1	253	tags=9%, list=1%, signal=9%	IFNA16/IFNA10/IFNA4/IFNA8/IFNA1	ACC
KEGG_RIG_I_LIKE_RECEPTOR_SIGNALING_PATHWAY	KEGG_RIG_I_LIKE_RECEPTOR_SIGNALING_PATHWAY	70	0.609544	1.50157	0.0357143	1	1	253	tags=9%, list=1%, signal=8%	IFNA16/IFNA10/IFNA4/IFNA8/IFNK/IFNA1	ACC
KEGG_OLFACTORY_TRANSDUCTION	KEGG_OLFACTORY_TRANSDUCTION	359	0.433247	1.32416	0.0363636	1	1	933	tags=25%, list=5%, signal=24%	OR52K1/OR6C65/OR7G2/OR4A47/OR2A5/OR56A5/OR4N5/OR4D10/OR2Z1/OR4K1/OR10V1/OR7D4/OR4B1/OR4C3/OR14A16/OR2G3/OR2M7/OR7G1/OR2T12/OR1L6/OR51M1/OR4F6/OR56A3/OR52J3/OR8B8/OR52E2/OR13C8/OR6C75/OR10H5/OR51A2/OR4F4/OR2T2/OR4M1/OR5M9/OR8H3/OR5D18/OR4E2/OR4A5/OR14J1/OR4F17/OR5T2/OR4C13/OR4K17/OR56A4/OR6F1/OR11H6/OR10T2/OR2A1/OR8G5/OR2M4/OR13C9/OR2AT4/OR52I1/OR1L8/OR10J3/OR13C3/OR51B4/OR6K3/OR51A7/OR52B2/OR2A2/…	ACC
KEGG_SYSTEMIC_LUPUS_ERYTHEMATOSUS	KEGG_SYSTEMIC_LUPUS_ERYTHEMATOSUS	54	0.719293	1.85512	0.0169492	0.131429	0.11203	4674	tags=78%, list=24%, signal=59%	C4B/C7/C4A/CTSG/C6/IL10/IFNG/FCGR1A/CD80/GRIN2A/CD28/FCGR2B/HLA-DOB/GRIN2B/ACTN3/CD40LG/FCGR2A/FCGR3A/C1S/CD86/HLA-DQA1/TNF/C1R/HLA-DMB/C1QB/C1QC/C3/HLA-DQB1/C1QA/C2/ACTN1/HLA-DPA1/HLA-DQA2/HLA-DOA/ELANE/HLA-DPB1/C9/HLA-DRB5/ACTN2/C8G/HLA-DRB1/HLA-DRA	BLCA
KEGG_CELL_ADHESION_MOLECULES_CAMS	KEGG_CELL_ADHESION_MOLECULES_CAMS	131	0.643719	1.83814	0.016129	0.131429	0.11203	4831	tags=60%, list=25%, signal=46%	CNTN1/NRXN2/CDH2/NEGR1/CD22/L1CAM/CADM3/NCAM1/CLDN6/CLDN17/PDCD1LG2/CLDN2/VCAN/CNTNAP2/ICAM3/NCAM2/CLDN14/CD80/CLDN9/CD226/PDCD1/ICOS/CD28/CTLA4/HLA-DOB/SPN/CD6/CD40LG/NRCAM/VCAM1/PTPRC/CD86/ITGB2/NFASC/JAM3/SIGLEC1/HLA-DQA1/ITGAM/SELPLG/SELP/JAM2/CD2/ITGAL/SELE/CD8A/ITGA4/CD274/CLDN11/CDH15/SELL/MAG/NLGN1/ICAM1/HLA-DMB/CNTNAP1/CD8B/NRXN1/HLA-DQB1/HLA-DPA1/HLA-DQA2/HLA-DOA/SDC2/HLA-DPB1/CD4/CNTN2…	BLCA
KEGG_CHEMOKINE_SIGNALING_PATHWAY	KEGG_CHEMOKINE_SIGNALING_PATHWAY	187	0.599142	1.79191	0.0178571	0.131429	0.11203	3882	tags=37%, list=20%, signal=30%	ADCY8/GRK1/CXCR5/CCL1/GNG4/CCL7/CCL19/CCL26/CCL21/CCR6/CCR2/CCL11/CCR8/CXCL13/GNG8/ITK/CCR4/CCL25/CCL18/CXCL9/CXCL12/CCR5/CXCR3/DOCK2/NCF1/ADCY7/CCL8/CCL13/CXCL11/CCL24/PIK3R5/CCL2/RASGRP2/CCL4L2/CCR7/CCL23/HCK/PIK3CG/CCL4/AKT3/CCL3/CCR3/GNGT2/CXCR6/PIK3CD/XCR1/CCL3L3/GNB4/CXCL10/GNG2/CCL27/CXCL14/CCR1/CCL5/PRKCB/WAS/CXCL5/GRK5/CXCL2/PPBP/ELMO1/ADCY9/ADCY5/GNG7/CCL22/CCR10/JAK3/CXCR4/GNB3	BLCA
KEGG_MELANOMA	KEGG_MELANOMA	71	0.683199	1.79106	0.016129	0.131429	0.11203	2852	tags=38%, list=15%, signal=33%	FGF3/FGF16/FGF19/FGF7/FGF18/FGF5/FGF14/FGF10/IGF1/FGF20/FGF1/FGF6/FGF21/FGFR1/FGF8/FGF9/PDGFC/FGF22/PDGFRB/PIK3R5/PDGFRA/PIK3CG/AKT3/PIK3CD/CDKN2A/FGF2/CDK6	BLCA
KEGG_VIRAL_MYOCARDITIS	KEGG_VIRAL_MYOCARDITIS	68	0.678873	1.75552	0.0166667	0.131429	0.11203	4674	tags=56%, list=24%, signal=43%	MYH4/MYH13/MYH8/SGCD/SGCA/MYH1/MYH11/MYH15/CD80/LAMA2/CD28/MYH3/HLA-DOB/CD40LG/DMD/CD86/ITGB2/HLA-DQA1/ITGAL/PRF1/MYH2/ICAM1/HLA-DMB/CAV1/FYN/HLA-DQB1/SGCG/HLA-DPA1/MYH10/HLA-DQA2/HLA-DOA/HLA-DPB1/MYH7B/SGCB/HLA-DRB5/ABL2/HLA-DRB1/HLA-DRA	BLCA
KEGG_GRAFT_VERSUS_HOST_DISEASE	KEGG_GRAFT_VERSUS_HOST_DISEASE	37	0.740896	1.73458	0.0169492	0.131429	0.11203	4674	tags=78%, list=24%, signal=60%	KIR3DL1/KIR2DL1/KIR3DL2/KIR2DL3/IFNG/CD80/IL6/CD28/HLA-DOB/GZMB/FASLG/CD86/HLA-DQA1/PRF1/IL2/TNF/KLRD1/HLA-DMB/FAS/HLA-DQB1/HLA-DPA1/HLA-DQA2/HLA-DOA/HLA-DPB1/IL1B/IL1A/HLA-DRB5/HLA-DRB1/HLA-DRA	BLCA
KEGG_CYTOKINE_CYTOKINE_RECEPTOR_INTERACTION	KEGG_CYTOKINE_CYTOKINE_RECEPTOR_INTERACTION	263	0.559362	1.71144	0.016129	0.131429	0.11203	4296	tags=54%, list=22%, signal=43%	IFNA10/IL9/CXCR5/IL22RA2/IL25/IL21/CCL1/CCL7/IL12B/TNFRSF13B/CCL19/CCL26/TNFSF4/CCL21/INHBA/CCR6/TNFRSF17/CCR2/CCL11/CCR8/TNFRSF9/CXCL13/IL21R/LTA/FLT3/IFNL2/IFNA13/TGFB3/TNFRSF8/TNFSF8/TNFRSF19/IL12RB2/CD70/TPO/IL10/IL7R/CCR4/IFNG/TGFB2/CCL25/IFNL3/CCL18/CXCL9/CSF2/CXCL12/CCR5/CXCR3/IL6/EDAR/CCL8/IFNK/PDGFC/IL1R2/IFNA21/CD27/CNTFR/FASLG/CCL13/CXCL11/IL12RB1/TNFSF14/CD40LG/NGFR/CCL24/PDGFRB/OSM/I…	BLCA
KEGG_FOCAL_ADHESION	KEGG_FOCAL_ADHESION	199	0.566763	1.70058	0.0175439	0.131429	0.11203	4605	tags=40%, list=23%, signal=31%	MYL7/PRKCG/COL11A1/MYL2/COMP/COL6A6/FLNC/ITGA11/TNN/CAV3/THBS4/MYLK/IGF1/TNC/LAMA1/COL5A1/THBS2/TNXB/ITGB3/COL6A3/RASGRF1/LAMA2/PDGFC/COL5A3/VTN/FN1/COL5A2/ACTN3/PARVG/PDGFRB/PIK3R5/TNR/COL1A2/PDGFRA/COL3A1/ITGA7/PIK3CG/COL1A1/AKT3/LAMA3/IBSP/PIK3CD/COL6A2/ITGA4/ITGA5/COL4A4/CCND2/COL6A1/MYL9/THBS1/ITGA1/LAMA4/PRKCB/CAV1/FYN/SPP1/FLNA/LAMC2/PARVB/ILK/BIRC3/HGF/CAV2/ACTN1/COL2A1/PDGFB/MYL10/VEGFC/…	BLCA
KEGG_ALLOGRAFT_REJECTION	KEGG_ALLOGRAFT_REJECTION	35	0.702775	1.68869	0.0163934	0.131429	0.11203	4674	tags=69%, list=24%, signal=52%	IL12B/IL10/IFNG/CD80/CD28/HLA-DOB/GZMB/FASLG/CD40LG/CD86/HLA-DQA1/PRF1/IL2/TNF/HLA-DMB/FAS/HLA-DQB1/HLA-DPA1/HLA-DQA2/HLA-DOA/HLA-DPB1/HLA-DRB5/HLA-DRB1/HLA-DRA	BLCA
KEGG_ECM_RECEPTOR_INTERACTION	KEGG_ECM_RECEPTOR_INTERACTION	84	0.614557	1.68256	0.0153846	0.131429	0.11203	4828	tags=62%, list=25%, signal=47%	COL11A1/COMP/COL6A6/ITGA11/TNN/GP5/THBS4/TNC/LAMA1/COL5A1/THBS2/TNXB/ITGB3/COL6A3/LAMA2/COL5A3/VTN/FN1/COL5A2/TNR/COL1A2/COL3A1/ITGA7/GP1BA/COL1A1/SV2B/LAMA3/IBSP/COL6A2/ITGA4/ITGA5/COL4A4/COL6A1/THBS1/ITGA1/LAMA4/SPP1/GP6/LAMC2/COL2A1/SDC2/HSPG2/ITGB7/CD44/COL4A2/ITGB8/ITGB5/COL4A1/ITGAV/CD36/SDC3/ITGA9	BLCA
KEGG_LEISHMANIA_INFECTION	KEGG_LEISHMANIA_INFECTION	69	0.626508	1.64254	0.016129	0.131429	0.11203	4955	tags=54%, list=25%, signal=40%	IL12B/TGFB3/IL10/IFNG/TGFB2/FCGR1A/NCF1/HLA-DOB/NCF2/FCGR2A/FCGR3A/ITGB2/HLA-DQA1/ITGAM/CR1/ITGA4/TNF/PRKCB/HLA-DMB/C3/HLA-DQB1/MAPK12/HLA-DPA1/HLA-DQA2/HLA-DOA/HLA-DPB1/IL1B/MAPK11/NCF4/IL1A/HLA-DRB5/HLA-DRB1/HLA-DRA/PTGS2/JAK2/FCGR3B/STAT1	BLCA
KEGG_INTESTINAL_IMMUNE_NETWORK_FOR_IGA_PRODUCTION	KEGG_INTESTINAL_IMMUNE_NETWORK_FOR_IGA_PRODUCTION	46	0.656743	1.63903	0.0163934	0.131429	0.11203	4714	tags=72%, list=24%, signal=55%	AICDA/TNFRSF13B/TNFRSF17/IL10/CCL25/CD80/CXCL12/ICOS/IL6/CD28/HLA-DOB/CD40LG/CD86/TNFSF13B/HLA-DQA1/IL2/ITGA4/CCL27/TNFRSF13C/HLA-DMB/HLA-DQB1/HLA-DPA1/HLA-DQA2/HLA-DOA/CCR10/CXCR4/HLA-DPB1/IL15RA/ITGB7/HLA-DRB5/HLA-DRB1/HLA-DRA/MAP3K14	BLCA
KEGG_HEMATOPOIETIC_CELL_LINEAGE	KEGG_HEMATOPOIETIC_CELL_LINEAGE	85	0.592922	1.61047	0.015873	0.131429	0.11203	4721	tags=69%, list=24%, signal=53%	CR2/MS4A1/THPO/CD22/FCER2/CD19/GP5/FLT3/TPO/IL7R/FCGR1A/CSF2/ITGB3/CD5/IL6/CD38/IL1R2/CD3G/CD1E/CD37/CD1B/IL11/ANPEP/IL2RA/CD1A/CSF2RA/CSF1R/ITGAM/GP1BA/CD3E/CD2/CD33/IL5RA/CD8A/CR1/CD7/ITGA4/TNF/ITGA5/ITGA1/CD1C/CD3D/CD14/CD8B/CSF3/KITLG/IL1R1/CSF1/CD1D/IL1B/CD4/CD44/MME/IL1A/HLA-DRB5/HLA-DRB1/HLA-DRA/CD36/EPO	BLCA
KEGG_LEUKOCYTE_TRANSENDOTHELIAL_MIGRATION	KEGG_LEUKOCYTE_TRANSENDOTHELIAL_MIGRATION	116	0.568806	1.6002	0.016129	0.131429	0.11203	4050	tags=35%, list=21%, signal=28%	MYL7/NOX3/PRKCG/MYL2/CLDN6/CLDN17/MMP9/ITK/CLDN2/RHOH/CLDN14/CLDN9/CXCL12/NCF1/NCF2/ACTN3/CYBB/VCAM1/PIK3R5/ITGB2/THY1/JAM3/ITGAM/PIK3CG/JAM2/ITGAL/PIK3CD/ITGA4/CLDN11/MYL9/MMP2/PRKCB/ICAM1/MAPK12/ACTN1/CXCR4/MSN/MYL10/MAPK11/NCF4/VAV1	BLCA
KEGG_REGULATION_OF_ACTIN_CYTOSKELETON	KEGG_REGULATION_OF_ACTIN_CYTOSKELETON	212	0.52281	1.58577	0.0172414	0.131429	0.11203	5031	tags=38%, list=26%, signal=29%	FGF3/MYL7/FGF16/CHRM2/FGF19/MYL2/FGF7/FGF18/ITGA11/FGF5/FGF14/FGF10/MYLK/FGF20/FGF1/FGF6/FGF21/FGFR1/ITGB3/FGF8/FGF9/PDGFC/NCKAP1L/FGF22/FN1/ACTN3/ITGAX/MOS/PDGFRB/PIK3R5/ITGB2/PDGFRA/ITGAM/ITGA7/PIK3CG/ITGAL/PIK3CD/IQGAP2/ITGA4/FGF2/ITGA5/CFL2/MYL9/ITGA1/MRAS/ARHGEF4/CHRM3/WAS/CD14/F2R/INS/DIAPH3/ACTN1/MYH10/PDGFB/MSN/MYL10/VAV1/BDKRB1/ITGB7/FGFR2/PIP4K2A/GSN/ITGB8/BAIAP2/ITGB5/TIAM2/GNA12/EGFR/…	BLCA
KEGG_TYPE_I_DIABETES_MELLITUS	KEGG_TYPE_I_DIABETES_MELLITUS	41	0.665141	1.58361	0.0169492	0.131429	0.11203	4674	tags=68%, list=24%, signal=52%	IL12B/PTPRN/LTA/IFNG/CD80/CD28/HLA-DOB/GZMB/FASLG/CD86/HLA-DQA1/PRF1/IL2/TNF/HLA-DMB/FAS/INS/HLA-DQB1/HLA-DPA1/HLA-DQA2/HLA-DOA/GAD2/HLA-DPB1/IL1B/IL1A/HLA-DRB5/HLA-DRB1/HLA-DRA	BLCA
KEGG_DILATED_CARDIOMYOPATHY	KEGG_DILATED_CARDIOMYOPATHY	90	0.5716	1.56737	0.0163934	0.131429	0.11203	3550	tags=42%, list=18%, signal=35%	ADCY8/ACTC1/SGCD/PLN/MYL2/SGCA/DES/ITGA11/IGF1/MYL3/CACNG4/TGFB3/CACNG1/TGFB2/ITGB3/CACNA1C/CACNA2D1/ADCY7/LAMA2/CACNG3/DMD/CACNG6/ITGA7/SLC8A1/RYR2/TPM1/ITGA4/TNF/ITGA5/ITGA1/CACNG8/TNNT2/TPM2/MYBPC3/CACNB2/ADCY9/SGCG/ADCY5	BLCA
KEGG_PATHWAYS_IN_CANCER	KEGG_PATHWAYS_IN_CANCER	325	0.504609	1.56682	0.0144928	0.131429	0.11203	4220	tags=28%, list=22%, signal=23%	FGF3/FGF16/PRKCG/FGF19/GLI2/FGF7/WNT2/GLI1/WNT9B/FGF18/RUNX1T1/WNT7A/FGF5/FGF14/FGF10/IGF1/FGF20/FGF1/FGF6/FLT3/MMP9/LAMA1/TGFB3/FGF21/FGFR1/TGFB2/IL6/FGF8/FGF9/LAMA2/FGF22/CDKN2B/WNT11/FN1/LEF1/FASLG/NTRK1/FZD8/PDGFRB/PIK3R5/HHIP/AXIN2/CSF2RA/PDGFRA/RET/CSF1R/PIK3CG/AKT3/LAMA3/PIK3CD/SPI1/CDKN2A/BMP4/FGF2/TCF7L1/COL4A4/CDK6/MMP2/LAMA4/WNT5B/RARB/PRKCB/TCF7/GLI3/FZD10/KLK3/WNT2B/FAS/WNT6/MITF/LAM…	BLCA
KEGG_TIGHT_JUNCTION	KEGG_TIGHT_JUNCTION	131	0.545936	1.55892	0.016129	0.131429	0.11203	3993	tags=26%, list=20%, signal=21%	MYL7/PRKCG/MYH4/MYH13/MYH8/MYL2/MYH1/PPP2R2C/CLDN6/MYH11/CLDN17/MYH15/CLDN2/CLDN14/CLDN9/MYH3/ACTN3/PRKCQ/JAM3/JAM2/AKT3/CLDN11/MYH2/MYL9/MAP3K20/MRAS/PRKCB/EPB41L3/AMOTL1/ACTN1/MYH10/MYL10/MYH7B/EPB41L2	BLCA
KEGG_BASAL_CELL_CARCINOMA	KEGG_BASAL_CELL_CARCINOMA	55	0.587987	1.52425	0.0166667	0.131429	0.11203	4320	tags=53%, list=22%, signal=41%	GLI2/WNT2/GLI1/WNT9B/WNT7A/WNT11/LEF1/FZD8/HHIP/AXIN2/BMP4/TCF7L1/WNT5B/TCF7/GLI3/FZD10/WNT2B/WNT6/PTCH2/FZD1/WNT4/FZD9/FZD7/SMO/WNT9A/WNT3/WNT3A/FZD2/WNT10B	BLCA
KEGG_HYPERTROPHIC_CARDIOMYOPATHY_HCM	KEGG_HYPERTROPHIC_CARDIOMYOPATHY_HCM	83	0.547314	1.49187	0.0151515	0.131429	0.11203	3208	tags=40%, list=16%, signal=33%	ACTC1/SGCD/MYL2/SGCA/DES/ITGA11/IGF1/MYL3/CACNG4/TGFB3/CACNG1/TGFB2/ITGB3/CACNA1C/IL6/CACNA2D1/LAMA2/CACNG3/DMD/CACNG6/ITGA7/SLC8A1/RYR2/TPM1/ITGA4/TNF/ITGA5/ITGA1/CACNG8/TNNT2/TPM2/MYBPC3/CACNB2	BLCA
KEGG_MELANOGENESIS	KEGG_MELANOGENESIS	101	0.524006	1.47739	0.015873	0.131429	0.11203	4320	tags=38%, list=22%, signal=29%	ADCY8/PRKCG/CAMK2A/WNT2/WNT9B/GNAO1/WNT7A/ADCY7/WNT11/LEF1/FZD8/TYRP1/CREB3L1/EDN1/TCF7L1/WNT5B/PRKCB/TCF7/CALML5/FZD10/WNT2B/POMC/WNT6/MITF/ADCY9/FZD1/ADCY5/KITLG/ASIP/WNT4/FZD9/FZD7/WNT9A/WNT3/WNT3A/FZD2/CALML3/WNT10B	BLCA
KEGG_NOD_LIKE_RECEPTOR_SIGNALING_PATHWAY	KEGG_NOD_LIKE_RECEPTOR_SIGNALING_PATHWAY	62	0.563267	1.46582	0.0166667	0.131429	0.11203	4051	tags=32%, list=21%, signal=26%	CCL7/CCL11/CASP5/NOD2/CARD18/IL6/CCL8/MEFV/CCL13/CCL2/NLRP3/TNF/CCL5/PSTPIP1/CXCL2/MAPK12/BIRC3/IL1B/MAPK11/TNFAIP3	BLCA
KEGG_GLIOMA	KEGG_GLIOMA	65	0.553676	1.46421	0.015873	0.131429	0.11203	4624	tags=28%, list=24%, signal=21%	PRKCG/CAMK2A/IGF1/PDGFRB/PIK3R5/PDGFRA/PIK3CG/AKT3/PIK3CD/CDKN2A/CDK6/PRKCB/CALML5/PDGFB/SHC4/CALML3/EGFR/TGFA	BLCA
KEGG_MAPK_SIGNALING_PATHWAY	KEGG_MAPK_SIGNALING_PATHWAY	267	0.469911	1.44362	0.016129	0.131429	0.11203	4566	tags=31%, list=23%, signal=24%	FGF3/FGF16/PRKCG/CACNA1E/PLA2G2E/FGF19/PLA2G2D/PLA2G5/FGF7/FLNC/FGF18/FGF5/FGF14/FGF10/FGF20/FGF1/FGF6/NGF/CACNG4/TGFB3/CACNG1/FGF21/FGFR1/TGFB2/CACNA1C/RASGRF1/CACNA2D1/FGF8/FGF9/PLA2G4E/IL1R2/FGF22/CACNG3/FASLG/PTPN7/PTPN5/MOS/NTRK1/PDGFRB/CACNG6/RASGRP2/PDGFRA/RASGRF2/AKT3/CACNA1H/FGF2/TNF/RASGRP4/MAP3K20/CACNG8/MAP4K1/MRAS/RASGRP1/PRKCB/PLA2G2A/CD14/CACNB2/FAS/FLNA/NTRK2/MAPK12/NFATC2/DUSP8/I…	BLCA
KEGG_METABOLISM_OF_XENOBIOTICS_BY_CYTOCHROME_P450	KEGG_METABOLISM_OF_XENOBIOTICS_BY_CYTOCHROME_P450	68	-0.561636	-1.55147	0.0238095	0.162257	0.138309	2296	tags=35%, list=12%, signal=31%	AKR1C4/AKR1C3/CYP2C18/ADH4/UGT2B15/AKR1C2/ADH1C/UGT1A9/CYP2C19/ADH6/UGT1A8/GSTA1/GSTA2/ADH1A/CYP2C8/UGT1A1/CYP3A5/CYP2C9/GSTA5/UGT2B10/CYP3A43/UGT2A1/UGT2B28/UGT2B11	BLCA
KEGG_PORPHYRIN_AND_CHLOROPHYLL_METABOLISM	KEGG_PORPHYRIN_AND_CHLOROPHYLL_METABOLISM	40	-0.637512	-1.52829	0.0238095	0.162257	0.138309	1898	tags=28%, list=10%, signal=25%	UGT2B15/UGT1A9/ALAS2/FTMT/UGT1A8/CP/UGT1A1/UGT2B10/UGT2A1/UGT2B28/UGT2B11	BLCA
KEGG_RETINOL_METABOLISM	KEGG_RETINOL_METABOLISM	64	-0.540949	-1.44706	0.025641	0.168498	0.143628	2136	tags=38%, list=11%, signal=34%	CYP2C18/ADH4/UGT2B15/ADH1C/CYP26A1/UGT1A9/CYP2C19/ADH6/UGT1A8/ADH1A/CYP2C8/CYP4A11/CYP4A22/UGT1A1/LRAT/CYP3A5/RDH8/CYP2C9/UGT2B10/CYP26C1/CYP3A43/UGT2A1/UGT2B28/UGT2B11	BLCA
KEGG_OLFACTORY_TRANSDUCTION	KEGG_OLFACTORY_TRANSDUCTION	359	-0.64823	-2.16501	0.03125	0.185859	0.158426	1291	tags=44%, list=7%, signal=42%	OR4D5/OR10Q1/OR2B11/OR7A17/OR56B4/OR10K2/OR52I1/OR1E2/OR2J3/OR1J4/OR12D3/OR1A2/OR4F5/OR13H1/OR4Q3/OR1L8/PRKACG/OR52K2/OR52E4/OR2M3/CNGA4/OR2G2/OR2K2/OR10H5/OR10G3/OR13A1/OR6C6/OR2H1/OR10A2/OR10AD1/OR2AK2/OR2J2/OR5T1/OR5A1/OR56A5/OR2G3/OR13C5/OR5AK2/OR11H6/OR1L3/OR8B12/OR13D1/OR51I1/OR1S2/OR2T33/OR9I1/OR11A1/OR2H2/OR6C68/OR52B2/OR3A1/OR52B6/OR9A4/OR10H2/OR13G1/OR2T1/OR3A3/OR10H1/OR9A2/OR7G3/OR5M11…	BLCA
KEGG_ASTHMA	KEGG_ASTHMA	28	0.651163	1.47583	0.0307692	0.185859	0.158426	4674	tags=75%, list=24%, signal=57%	IL9/CCL11/IL10/HLA-DOB/CD40LG/RNASE3/MS4A2/HLA-DQA1/TNF/FCER1G/FCER1A/HLA-DMB/HLA-DQB1/IL13/HLA-DPA1/HLA-DQA2/HLA-DOA/HLA-DPB1/HLA-DRB5/HLA-DRB1/HLA-DRA	BLCA
KEGG_FC_GAMMA_R_MEDIATED_PHAGOCYTOSIS	KEGG_FC_GAMMA_R_MEDIATED_PHAGOCYTOSIS	95	0.506155	1.39944	0.0333333	0.185859	0.158426	3016	tags=21%, list=15%, signal=18%	PRKCG/AMPH/FCGR1A/SPHK1/DOCK2/NCF1/FCGR2B/PLA2G4E/FCGR2A/FCGR3A/PTPRC/PIK3R5/DNM1/HCK/PIK3CG/AKT3/PIK3CD/CFL2/PRKCB/WAS	BLCA
KEGG_T_CELL_RECEPTOR_SIGNALING_PATHWAY	KEGG_T_CELL_RECEPTOR_SIGNALING_PATHWAY	108	0.499267	1.39305	0.0327869	0.185859	0.158426	4076	tags=33%, list=21%, signal=27%	ITK/IL10/IFNG/CSF2/PDCD1/ICOS/GRAP2/CD28/CTLA4/CD3G/CD247/CD40LG/PTPRC/PRKCQ/PIK3R5/ZAP70/PIK3CG/CD3E/AKT3/PIK3CD/CD8A/IL2/TNF/LCP2/NFATC1/RASGRP1/CD3D/FYN/CD8B/MAPK12/LCK/NFATC2/CD4/MAPK11/VAV1/NFATC4	BLCA
KEGG_HEDGEHOG_SIGNALING_PATHWAY	KEGG_HEDGEHOG_SIGNALING_PATHWAY	56	0.525769	1.36964	0.0322581	0.185859	0.158426	4320	tags=48%, list=22%, signal=38%	GLI2/GAS1/WNT2/GLI1/WNT9B/WNT7A/DHH/BMP6/WNT11/RAB23/HHIP/ZIC2/BMP4/BMP8A/WNT5B/GLI3/WNT2B/WNT6/LRP2/PTCH2/CSNK1A1L/WNT4/SMO/WNT9A/WNT3/WNT3A/WNT10B	BLCA
KEGG_ARRHYTHMOGENIC_RIGHT_VENTRICULAR_CARDIOMYOPATHY_ARVC	KEGG_ARRHYTHMOGENIC_RIGHT_VENTRICULAR_CARDIOMYOPATHY_ARVC	74	0.542137	1.4186	0.047619	0.25034	0.213391	4828	tags=54%, list=25%, signal=41%	SGCD/SGCA/DES/CDH2/ITGA11/CACNG4/CACNG1/ITGB3/CACNA1C/CACNA2D1/LAMA2/CACNG3/LEF1/ACTN3/DMD/CACNG6/DSC2/ITGA7/SLC8A1/RYR2/ITGA4/TCF7L1/ITGA5/ITGA1/CACNG8/TCF7/CACNB2/SGCG/ACTN1/DSP/CACNA2D3/ITGB7/SGCB/ITGB8/ITGB5/CACNA1S/ACTN2/ITGAV/CACNA2D2/ITGA9	BLCA
KEGG_TGF_BETA_SIGNALING_PATHWAY	KEGG_TGF_BETA_SIGNALING_PATHWAY	85	0.512225	1.39129	0.047619	0.25034	0.213391	4273	tags=33%, list=22%, signal=26%	LEFTY2/COMP/NOG/INHBA/CHRD/THBS4/DCN/TGFB3/THBS2/IFNG/TGFB2/BMP6/CDKN2B/BMP4/TNF/BMP8A/THBS1/NODAL/INHBE/AMH/LTBP1/GDF6/PITX2/FST/INHBC/TGFBR1/SMAD7/AMHR2	BLCA
KEGG_CYTOKINE_CYTOKINE_RECEPTOR_INTERACTION	KEGG_CYTOKINE_CYTOKINE_RECEPTOR_INTERACTION	263	0.664309	1.93237	0.0114943	0.15082	0.130285	3500	tags=57%, list=18%, signal=47%	CCL27/IFNA13/IFNA6/IFNA16/IL21/GH2/IFNA2/CCL15/IFNG/IL5RA/IL22/CCR8/EPO/IL21R/TNFRSF9/TNFSF4/CXCR5/IL26/CCL11/LTA/IFNA1/IFNK/IL12B/CCL7/CD70/CSF2/IL2/IL3/IL11/TNFRSF13B/IL9R/CCR4/CXCL11/TNFSF9/IFNA17/FASLG/CCL13/IL2RA/CCR3/CXCR6/TNFRSF17/INHBA/CXCR3/IL10/TNFSF18/CCL25/CCL26/TNFRSF8/BMP7/TNFSF14/CCR6/XCL2/CCL22/IL18RAP/XCR1/GH1/XCL1/CCR2/CD40LG/IFNB1/IL1A/CCL17/IL12RB1/CCL8/CCL24/OSM/CXCL13/IL13/C…	BRCA
KEGG_JAK_STAT_SIGNALING_PATHWAY	KEGG_JAK_STAT_SIGNALING_PATHWAY	155	0.650962	1.78006	0.012987	0.15082	0.130285	2841	tags=37%, list=14%, signal=32%	IFNA13/IFNA6/IFNA16/IL21/CSH1/GH2/IFNA2/IFNG/IL5RA/IL22/EPO/IL21R/IL26/IFNA1/IFNK/IL12B/CSF2/IL2/IL3/IL11/IL9R/IFNA17/IL2RA/IL10/STAT4/GH1/IFNB1/IL12RB1/PIK3CG/OSM/IL13/IFNA7/IFNL1/IL20RB/IFNL3/SOCS1/CRLF2/IL7R/IL7/IFNL2/JAK3/IL2RG/IL2RB/CCND2/IL15/PIK3R5/IL23R/IL12A/CSF2RB/IL24/IL10RA/AKT3/IFNE/IL9/PIK3CD/LIF/IL15RA/CSF2RA	BRCA
KEGG_OLFACTORY_TRANSDUCTION	KEGG_OLFACTORY_TRANSDUCTION	359	0.583276	1.75205	0.0107527	0.15082	0.130285	1644	tags=38%, list=8%, signal=36%	OR5B17/OR4B1/OR8H3/OR52A5/OR7G2/OR4S2/OR10T2/OR10G9/OR4F4/OR4A5/OR5M3/OR13C8/OR6C6/OR10Z1/OR4D5/OR4M1/OR5A2/OR8J3/OR5M8/OR10R2/OR10G7/OR10G4/OR5I1/OR1S2/OR4C15/OR13C4/OR4K17/OR5T1/OR4F6/CLCA1/OR7D4/OR4C11/OR4Q3/OR10K1/OR10G8/OR2AT4/OR6Y1/OR51A7/OR4K1/OR8I2/OR6C74/OR11H1/OR7G3/OR4L1/OR4A47/OR4D6/OR6C75/OR5AN1/OR9I1/OR4D11/OR5B12/OR51A4/OR10G3/OR2M2/OR10A2/OR4D9/OR10A4/OR51L1/OR6S1/OR6N2/OR6K3/OR2M…	BRCA
KEGG_GRAFT_VERSUS_HOST_DISEASE	KEGG_GRAFT_VERSUS_HOST_DISEASE	37	0.771425	1.74036	0.0153846	0.15082	0.130285	3934	tags=86%, list=20%, signal=69%	KIR3DL2/KIR2DL3/KIR3DL1/IFNG/CD80/IL2/KLRD1/KLRC1/FASLG/GZMB/CD28/IL1A/PRF1/CD86/HLA-DOB/FAS/HLA-DQA2/HLA-DMB/HLA-DOA/HLA-DQA1/HLA-DQB1/HLA-G/IL1B/HLA-DMA/HLA-F/HLA-DRB5/HLA-DPA1/HLA-DPB1/KIR2DL1/HLA-DRB1/TNF/HLA-DRA	BRCA
KEGG_INTESTINAL_IMMUNE_NETWORK_FOR_IGA_PRODUCTION	KEGG_INTESTINAL_IMMUNE_NETWORK_FOR_IGA_PRODUCTION	46	0.752196	1.74015	0.0149254	0.15082	0.130285	3934	tags=78%, list=20%, signal=63%	CCL27/AICDA/ICOS/CD80/IL2/TNFRSF13B/TNFRSF17/IL10/CCL25/CD40LG/CD28/ITGB7/CD86/HLA-DOB/IL15/TNFSF13B/HLA-DQA2/ITGA4/HLA-DMB/HLA-DOA/HLA-DQA1/TNFRSF13C/CD40/CXCL12/IL15RA/HLA-DQB1/CCR10/HLA-DMA/CCR9/HLA-DRB5/HLA-DPA1/TGFB1/HLA-DPB1/PIGR/HLA-DRB1/HLA-DRA	BRCA
KEGG_PENTOSE_AND_GLUCURONATE_INTERCONVERSIONS	KEGG_PENTOSE_AND_GLUCURONATE_INTERCONVERSIONS	28	0.798103	1.73803	0.015873	0.15082	0.130285	697	tags=36%, list=4%, signal=34%	UGT1A5/UGT1A3/UGT1A1/UGT1A6/UGT1A7/UGT1A10/UGT2A3/UGT1A9/UGT1A4/UGT1A8	BRCA
KEGG_NATURAL_KILLER_CELL_MEDIATED_CYTOTOXICITY	KEGG_NATURAL_KILLER_CELL_MEDIATED_CYTOTOXICITY	131	0.642637	1.71475	0.0131579	0.15082	0.130285	4000	tags=49%, list=20%, signal=39%	IFNA13/IFNA6/IFNA16/IFNA2/KIR3DL2/KIR2DL3/KIR3DL1/IFNG/IFNA1/FCGR3B/NCR1/CSF2/KIR2DL4/NCR3/KLRD1/KLRC1/IFNA17/SH2D1A/FASLG/GZMB/PRKCB/PPP3R2/CD244/IFNB1/PIK3CG/ZAP70/CD247/IFNA7/PRF1/LCK/CHP2/KLRK1/ULBP2/CD48/FAS/PIK3R5/LCP2/SH2D1B/HCST/VAV1/ITGAL/KLRC2/PIK3CD/FCGR3A/ITGB2/FYN/HLA-G/RAET1E/ICAM1/IFNA5/IFNA8/RAC2/FCER1G/KLRC3/MICB/NFATC2/TYROBP/KIR2DL1/PRKCA/TNF/TNFSF10/SYK/RAET1G/LAT	BRCA
KEGG_PRIMARY_IMMUNODEFICIENCY	KEGG_PRIMARY_IMMUNODEFICIENCY	35	0.788768	1.71275	0.0163934	0.15082	0.130285	2916	tags=71%, list=15%, signal=61%	AICDA/RAG2/CD19/ICOS/TNFRSF13B/IGLL1/CD40LG/CD79A/ZAP70/CD8B/CD3D/LCK/CD3E/CIITA/IL7R/JAK3/IL2RG/BTK/PTPRC/CD8A/TNFRSF13C/ADA/CD40/CD4/AIRE	BRCA
KEGG_HEMATOPOIETIC_CELL_LINEAGE	KEGG_HEMATOPOIETIC_CELL_LINEAGE	85	0.685557	1.71255	0.0153846	0.15082	0.130285	3443	tags=59%, list=18%, signal=49%	IL5RA/FCER2/EPO/CD19/CD1A/CR2/CSF2/CD1B/IL3/IL11/MS4A1/IL9R/IL2RA/CD3G/CR1/CD38/CD1E/GP5/CD5/IL1A/FCGR1A/CD7/CD8B/CD3D/IL1R2/CD3E/IL7R/CD2/IL7/MME/CD1C/CD33/CD8A/FLT3LG/CD37/DNTT/ITGA4/THPO/GP1BA/ITGAM/IL1R1/CSF2RA/CD4/ITGA5/IL1B/CD55/ITGA1/FLT3/HLA-DRB5/IL4R	BRCA
KEGG_STEROID_HORMONE_BIOSYNTHESIS	KEGG_STEROID_HORMONE_BIOSYNTHESIS	55	0.730833	1.70442	0.0147059	0.15082	0.130285	2045	tags=44%, list=10%, signal=39%	UGT1A5/UGT1A3/UGT1A1/UGT1A6/UGT1A7/UGT1A10/UGT2A3/UGT1A9/CYP11B1/SULT1E1/UGT1A4/UGT1A8/CYP11B2/SRD5A2/HSD3B1/CYP11A1/HSD17B6/UGT2B10/CYP21A2/UGT2B28/AKR1D1/UGT2B11/HSD11B1/AKR1C2	BRCA
KEGG_ASCORBATE_AND_ALDARATE_METABOLISM	KEGG_ASCORBATE_AND_ALDARATE_METABOLISM	25	0.801007	1.68811	0.016129	0.15082	0.130285	697	tags=40%, list=4%, signal=39%	UGT1A5/UGT1A3/UGT1A1/UGT1A6/UGT1A7/UGT1A10/UGT2A3/UGT1A9/UGT1A4/UGT1A8	BRCA
KEGG_ANTIGEN_PROCESSING_AND_PRESENTATION	KEGG_ANTIGEN_PROCESSING_AND_PRESENTATION	80	0.680826	1.68786	0.0151515	0.15082	0.130285	4029	tags=57%, list=21%, signal=46%	IFNA13/KIR3DL3/IFNA6/IFNA16/IFNA2/KIR3DL2/KIR2DL3/KIR3DL1/LTA/IFNA1/KIR2DL4/KLRD1/KLRC1/IFNA17/CD8B/IFNA7/CIITA/HLA-DOB/CD8A/IFI30/HLA-DQA2/KLRC4/HLA-DMB/HLA-DOA/HLA-DQA1/KLRC2/HLA-DQB1/HLA-G/CD4/HLA-DMA/IFNA5/IFNA8/HLA-F/HLA-DRB5/CTSS/HLA-DPA1/KLRC3/HLA-DPB1/KIR2DL1/TAP2/HLA-DRB1/TAP1/HLA-DRA/CD74/CTSL/LGMN	BRCA
KEGG_T_CELL_RECEPTOR_SIGNALING_PATHWAY	KEGG_T_CELL_RECEPTOR_SIGNALING_PATHWAY	108	0.64068	1.66537	0.0138889	0.15082	0.130285	2912	tags=30%, list=15%, signal=25%	IFNG/ICOS/CTLA4/CSF2/IL2/ITK/PDCD1/CD3G/IL10/PPP3R2/GRAP2/CD40LG/CD28/PIK3CG/ZAP70/PRKCQ/CD247/CD8B/CARD11/CD3D/LCK/CD3E/CHP2/PTPRC/CD8A/PIK3R5/LCP2/AKT3/VAV1/PIK3CD/FYN/CD4	BRCA
KEGG_PORPHYRIN_AND_CHLOROPHYLL_METABOLISM	KEGG_PORPHYRIN_AND_CHLOROPHYLL_METABOLISM	40	0.732488	1.65416	0.0151515	0.15082	0.130285	697	tags=25%, list=4%, signal=24%	UGT1A5/UGT1A3/UGT1A1/UGT1A6/UGT1A7/UGT1A10/UGT2A3/UGT1A9/UGT1A4/UGT1A8	BRCA
KEGG_ALLOGRAFT_REJECTION	KEGG_ALLOGRAFT_REJECTION	35	0.759383	1.64894	0.0163934	0.15082	0.130285	3934	tags=83%, list=20%, signal=66%	IFNG/IL12B/CD80/IL2/FASLG/GZMB/IL10/CD40LG/CD28/PRF1/CD86/HLA-DOB/FAS/HLA-DQA2/IL12A/HLA-DMB/HLA-DOA/HLA-DQA1/CD40/HLA-DQB1/HLA-G/HLA-DMA/HLA-F/HLA-DRB5/HLA-DPA1/HLA-DPB1/HLA-DRB1/TNF/HLA-DRA	BRCA
KEGG_TYPE_I_DIABETES_MELLITUS	KEGG_TYPE_I_DIABETES_MELLITUS	41	0.722143	1.64155	0.0147059	0.15082	0.130285	3934	tags=76%, list=20%, signal=61%	INS/PTPRN/IFNG/LTA/IL12B/CD80/IL2/FASLG/GZMB/CD28/IL1A/PRF1/CD86/HLA-DOB/FAS/HLA-DQA2/IL12A/HLA-DMB/HLA-DOA/HLA-DQA1/HLA-DQB1/HLA-G/IL1B/HLA-DMA/HLA-F/HLA-DRB5/HLA-DPA1/HLA-DPB1/HLA-DRB1/TNF/HLA-DRA	BRCA
KEGG_LEISHMANIA_INFECTION	KEGG_LEISHMANIA_INFECTION	69	0.691573	1.6278	0.015625	0.15082	0.130285	4021	tags=57%, list=20%, signal=45%	IFNG/FCGR3B/IL12B/CR1/IL10/PRKCB/NCF1/IL1A/FCGR1A/NCF2/HLA-DOB/TGFB2/HLA-DQA2/ITGA4/ITGAM/IL12A/HLA-DMB/HLA-DOA/HLA-DQA1/NCF4/FCGR3A/ITGB2/TLR4/HLA-DQB1/IL1B/HLA-DMA/FCGR2A/TGFB3/HLA-DRB5/HLA-DPA1/TGFB1/C3/TLR2/HLA-DPB1/HLA-DRB1/STAT1/TNF/HLA-DRA/FOS	BRCA
KEGG_TOLL_LIKE_RECEPTOR_SIGNALING_PATHWAY	KEGG_TOLL_LIKE_RECEPTOR_SIGNALING_PATHWAY	102	0.634151	1.62306	0.0142857	0.15082	0.130285	3275	tags=37%, list=17%, signal=31%	IFNA13/IFNA6/IFNA16/IFNA2/IFNA1/IL12B/CD80/CXCL11/IFNA17/LBP/TLR8/IFNB1/PIK3CG/CXCL9/IFNA7/TICAM2/CD86/TLR7/CCL4/CTSK/CXCL10/PIK3R5/CCL3/IL12A/CXCL8/LY96/TLR3/AKT3/CCL5/PIK3CD/CD40/TLR1/TLR4/IL1B/SPP1/TLR6/IFNA5/IFNA8	BRCA
KEGG_CHEMOKINE_SIGNALING_PATHWAY	KEGG_CHEMOKINE_SIGNALING_PATHWAY	187	0.554078	1.55449	0.0125	0.15082	0.130285	3365	tags=36%, list=17%, signal=30%	CCL27/CCL15/CCR8/CXCR5/CCL11/CCL7/GNG8/CCR4/CXCL11/ITK/CCL13/CCR3/CXCR6/CXCR3/CCL25/CCL26/PRKCB/CCR6/XCL2/CCL22/XCR1/NCF1/XCL1/CCR2/CCL17/CCL8/PIK3CG/CCL24/CXCL13/CXCL9/CCR5/ADCY7/DOCK2/CCR7/JAK3/GNGT2/CCL4/CXCR1/RASGRP2/CXCL10/PIK3R5/CXCL14/CCR1/CCL3/CXCR2/CCL4L2/FGR/CCL18/GNG2/CXCL8/CCL2/CCL1/AKT3/VAV1/CCL5/HCK/PF4/PIK3CD/WAS/CXCL12/PLCB2/CCR10/CCR9/CCL3L3/ADCY2/CCL19/RAC2	BRCA
KEGG_METABOLISM_OF_XENOBIOTICS_BY_CYTOCHROME_P450	KEGG_METABOLISM_OF_XENOBIOTICS_BY_CYTOCHROME_P450	68	0.642892	1.51509	0.015625	0.15082	0.130285	2045	tags=29%, list=10%, signal=26%	UGT1A5/UGT1A3/UGT1A1/UGT1A6/UGT1A7/ADH7/UGT1A10/CYP2C19/UGT2A3/UGT1A9/UGT1A4/UGT1A8/ALDH3A1/UGT2B10/UGT2B28/GSTM5/UGT2B11/GSTA5/GSTA3/AKR1C2	BRCA
KEGG_B_CELL_RECEPTOR_SIGNALING_PATHWAY	KEGG_B_CELL_RECEPTOR_SIGNALING_PATHWAY	75	0.654206	1.59747	0.030303	0.198276	0.171279	4735	tags=43%, list=24%, signal=32%	CD19/CR2/PRKCB/PPP3R2/PIK3CG/CD79A/CARD11/LILRB3/CD72/CHP2/FCGR2B/BTK/PIK3R5/PIK3AP1/AKT3/VAV1/CD79B/PIK3CD/INPP5D/DAPP1/RAC2/NFATC2/LYN/IFITM1/SYK/FOS/BLNK/NFATC4/RASGRP3/CD22/PPP3CC/NFKBIE	BRCA
KEGG_AUTOIMMUNE_THYROID_DISEASE	KEGG_AUTOIMMUNE_THYROID_DISEASE	50	0.678203	1.57533	0.0298507	0.198276	0.171279	3433	tags=68%, list=17%, signal=56%	IFNA13/IFNA6/IFNA16/IFNA2/IFNA1/CTLA4/CD80/IL2/IFNA17/FASLG/GZMB/IL10/TG/CD40LG/CD28/TSHR/IFNA7/PRF1/CD86/HLA-DOB/FAS/HLA-DQA2/HLA-DMB/HLA-DOA/HLA-DQA1/CD40/HLA-DQB1/HLA-G/HLA-DMA/IFNA5/IFNA8/HLA-F/HLA-DRB5/HLA-DPA1	BRCA
KEGG_STARCH_AND_SUCROSE_METABOLISM	KEGG_STARCH_AND_SUCROSE_METABOLISM	50	0.670701	1.5579	0.0298507	0.198276	0.171279	1781	tags=30%, list=9%, signal=27%	UGT1A5/UGT1A3/UGT1A1/UGT1A6/UGT1A7/UGT1A10/UGT2A3/UGT1A9/UGT1A4/AMY1C/UGT1A8/UGT2B10/HK3/UGT2B28/UGT2B11	BRCA
KEGG_NITROGEN_METABOLISM	KEGG_NITROGEN_METABOLISM	23	-0.657955	-1.50915	0.0277778	0.198276	0.171279	3002	tags=52%, list=15%, signal=44%	CPS1/AMT/CA7/CA4/CA13/CA8/CA14/GLUD2/GLS2/CA3/CA1/CA6	BRCA
KEGG_NOD_LIKE_RECEPTOR_SIGNALING_PATHWAY	KEGG_NOD_LIKE_RECEPTOR_SIGNALING_PATHWAY	62	0.650768	1.50505	0.03125	0.198276	0.171279	4322	tags=44%, list=22%, signal=34%	CCL11/CCL7/CCL13/CASP5/CARD18/PSTPIP1/CCL8/PYDC1/CXCL8/CCL2/NLRP3/CCL5/IL18/CASP1/NOD2/MEFV/BIRC3/IL1B/NLRC4/CARD6/TNFAIP3/NLRP1/TNF/PYCARD/NAIP/MAPK11/CXCL1	BRCA
KEGG_SYSTEMIC_LUPUS_ERYTHEMATOSUS	KEGG_SYSTEMIC_LUPUS_ERYTHEMATOSUS	54	0.642949	1.49011	0.0298507	0.198276	0.171279	4380	tags=72%, list=22%, signal=56%	IFNG/C8B/FCGR3B/CD80/IL10/CD40LG/CD28/FCGR1A/CD86/FCGR2B/C2/HLA-DOB/C4B/C1S/C4A/HLA-DQA2/HLA-DMB/HLA-DOA/HLA-DQA1/C1R/CD40/FCGR3A/HLA-DQB1/HLA-DMA/FCGR2A/HLA-DRB5/HLA-DPA1/C3/ACTN2/C9/HLA-DPB1/HLA-DRB1/TNF/HLA-DRA/C1QB/TRIM21/C1QA/C1QC/ACTN1	BRCA
KEGG_DRUG_METABOLISM_CYTOCHROME_P450	KEGG_DRUG_METABOLISM_CYTOCHROME_P450	70	0.611893	1.45495	0.0307692	0.198276	0.171279	2019	tags=30%, list=10%, signal=27%	UGT1A5/UGT1A3/UGT1A1/UGT1A6/UGT1A7/ADH7/UGT1A10/CYP2C19/UGT2A3/UGT1A9/UGT1A4/UGT1A8/ALDH3A1/FMO3/UGT2B10/UGT2B28/GSTM5/UGT2B11/FMO1/GSTA5/GSTA3	BRCA
KEGG_VIRAL_MYOCARDITIS	KEGG_VIRAL_MYOCARDITIS	68	0.607583	1.43188	0.03125	0.198276	0.171279	3934	tags=49%, list=20%, signal=39%	MYH13/MYH4/MYH6/CD80/MYH8/MYH1/SGCD/CD40LG/CD28/PRF1/CD86/HLA-DOB/HLA-DQA2/HLA-DMB/LAMA2/HLA-DOA/HLA-DQA1/ITGAL/CD40/ITGB2/FYN/HLA-DQB1/HLA-G/ICAM1/HLA-DMA/CD55/HLA-F/RAC2/HLA-DRB5/HLA-DPA1/HLA-DPB1/HLA-DRB1/HLA-DRA	BRCA
KEGG_CELL_ADHESION_MOLECULES_CAMS	KEGG_CELL_ADHESION_MOLECULES_CAMS	131	0.523148	1.39591	0.0263158	0.198276	0.171279	3648	tags=46%, list=19%, signal=38%	CLDN17/CNTN1/ICOS/CLDN14/CTLA4/CD80/CDH2/PDCD1/ICAM3/CD226/PDCD1LG2/CD274/NEGR1/CD40LG/CD28/CD6/SPN/CD8B/NECTIN3/VCAN/CD2/ITGB7/CD86/CLDN18/CLDN1/HLA-DOB/PTPRC/CD8A/ITGA8/VCAM1/HLA-DQA2/ITGA4/ITGAM/HLA-DMB/SELL/HLA-DOA/SIGLEC1/HLA-DQA1/SELPLG/JAM3/ITGAL/CNTNAP1/CD40/CADM1/ITGB2/HLA-DQB1/HLA-G/L1CAM/CD4/SDC1/ICAM1/HLA-DMA/HLA-F/CD99/SELE/HLA-DRB5/HLA-DPA1/SDC2/CNTNAP2/HLA-DPB1	BRCA
KEGG_DRUG_METABOLISM_OTHER_ENZYMES	KEGG_DRUG_METABOLISM_OTHER_ENZYMES	51	0.641825	1.49693	0.0441176	0.265768	0.229582	1781	tags=29%, list=9%, signal=27%	UGT1A5/UGT1A3/UGT1A1/UGT1A6/UGT1A7/UGT1A10/UGT2A3/UGT1A9/UGT1A4/UGT1A8/UGT2B10/CES5A/UGT2B28/CES1/UGT2B11	BRCA
KEGG_CYTOSOLIC_DNA_SENSING_PATHWAY	KEGG_CYTOSOLIC_DNA_SENSING_PATHWAY	54	0.624942	1.44837	0.0447761	0.265768	0.229582	3275	tags=35%, list=17%, signal=29%	IFNA13/IFNA6/IFNA16/IFNA2/IFNA1/AIM2/ZBP1/IFNA17/IFNB1/IFNA7/CCL4/CXCL10/CCL4L2/CCL5/IL18/CASP1/IL1B/IFNA5/IFNA8	BRCA
KEGG_RETINOL_METABOLISM	KEGG_RETINOL_METABOLISM	64	0.634159	1.47104	0.046875	0.269531	0.232833	697	tags=23%, list=4%, signal=23%	UGT1A5/UGT1A3/UGT1A1/UGT1A6/UGT1A7/ADH7/UGT1A10/RDH8/CYP2C19/UGT2A3/CYP26C1/UGT1A9/UGT1A4/CYP26A1/UGT1A8	BRCA
KEGG_REGULATION_OF_AUTOPHAGY	KEGG_REGULATION_OF_AUTOPHAGY	35	0.686262	1.49016	0.0491803	0.274218	0.236881	1013	tags=23%, list=5%, signal=22%	IFNA13/IFNA6/IFNA16/IFNA2/INS/IFNG/IFNA1/IFNA17	BRCA
KEGG_MATURITY_ONSET_DIABETES_OF_THE_YOUNG	KEGG_MATURITY_ONSET_DIABETES_OF_THE_YOUNG	25	-0.827935	-1.7955	0.02	0.69697	0.689793	1782	tags=68%, list=9%, signal=62%	MNX1/PDX1/HNF4A/PAX6/BHLHA15/ONECUT1/NKX6-1/NEUROG3/HNF4G/IAPP/FOXA2/HNF1A/HNF1B/SLC2A2/INS/NEUROD1/PAX4	CESC
KEGG_HEMATOPOIETIC_CELL_LINEAGE	KEGG_HEMATOPOIETIC_CELL_LINEAGE	85	0.668401	1.74477	0.0181818	0.69697	0.689793	3860	tags=59%, list=20%, signal=47%	DNTT/FCER2/CD1B/THPO/IL11/CD1E/CD36/GP9/CSF2/CD1C/GYPA/CD22/CD33/CD1A/ITGB3/IL7R/MS4A1/IL1A/IL9R/FCGR1A/IL2RA/FLT3/CD19/ITGA4/IL1R2/IL6/CSF1R/ITGA5/CD1D/IL1B/CSF3/CD5/ITGA1/CD4/ITGAM/CD37/CR2/CD3G/IL1R1/IL5/ITGA2/CD2/CD3D/EPO/CD14/CSF1/CD34/CSF2RA/CD8A/CD3E	CESC
KEGG_VIRAL_MYOCARDITIS	KEGG_VIRAL_MYOCARDITIS	68	0.661784	1.72946	0.0185185	0.69697	0.689793	4371	tags=46%, list=22%, signal=36%	MYH2/MYH1/MYH4/MYH8/MYH13/SGCA/CD80/CD28/MYH6/SGCD/DMD/MYH11/CD40LG/CD86/FYN/SGCG/CAV1/ITGB2/LAMA2/CD40/ITGAL/CCND1/ICAM1/HLA-DQA1/HLA-DOA/MYH7B/HLA-DQA2/MYH10/ABL2/HLA-DOB/RAC2	CESC
KEGG_OLFACTORY_TRANSDUCTION	KEGG_OLFACTORY_TRANSDUCTION	359	0.574417	1.69299	0.0147059	0.69697	0.689793	1005	tags=36%, list=5%, signal=35%	OR7G1/OR9I1/OR10A7/OR4F17/OR1S2/OR2S2/OR2T34/OR51G2/OR10H3/OR2T27/OR4C12/OR5M9/OR4S2/OR6Y1/OR4F6/OR8H1/OR4K13/OR2M7/OR5D16/OR4C13/OR5M8/OR5M10/OR10AG1/OR5T3/OR4C11/OR9G4/OR4A5/OR2T2/OR5M3/OR2T29/OR4A16/OR5I1/OR5D18/OR5B3/OR8B4/OR14C36/OR5A2/OR4C46/OR6C3/OR2T4/OR8H2/OR52A1/OR8D1/OR6C70/OR6N2/OR6C74/OR4D11/OR4D10/OR9G1/OR2T6/OR9K2/OR2F2/OR5B12/OR51M1/OR10Z1/OR6K6/OR51B6/OR5T1/OR52N5/OR56A4/OR2G3/OR…	CESC
KEGG_GRAFT_VERSUS_HOST_DISEASE	KEGG_GRAFT_VERSUS_HOST_DISEASE	37	0.686285	1.69111	0.0350877	0.69697	0.689793	5159	tags=70%, list=26%, signal=52%	IL2/KIR2DL3/KIR3DL1/KIR2DL1/CD80/CD28/IL1A/CD86/KIR3DL2/IL6/IL1B/IFNG/HLA-DQA1/HLA-DOA/GZMB/HLA-DQA2/TNF/HLA-DOB/HLA-DQB1/HLA-DPB1/KLRD1/HLA-G/PRF1/HLA-DPA1/HLA-F/HLA-DRB5	CESC
KEGG_TASTE_TRANSDUCTION	KEGG_TASTE_TRANSDUCTION	51	-0.689582	-1.67581	0.0416667	0.69697	0.689793	2601	tags=45%, list=13%, signal=39%	TAS2R60/TAS2R10/TAS2R8/TAS2R7/TAS2R50/TAS2R4/TAS2R5/TAS2R38/TAS2R42/CACNA1B/TAS2R43/GNG13/TAS2R9/TAS2R40/ASIC2/TAS1R1/TAS1R2/TRPM5/GNAT3/TAS2R3/ADCY8/PRKACG/TAS2R16	CESC
KEGG_STARCH_AND_SUCROSE_METABOLISM	KEGG_STARCH_AND_SUCROSE_METABOLISM	50	-0.660653	-1.63269	0.0408163	0.69697	0.689793	1465	tags=30%, list=7%, signal=28%	AMY2B/UGT2A1/UGT2A3/AMY1A/UGT1A4/UGT2B28/UGT2B7/ENPP3/MGAM/UGT2B15/G6PC2/AMY1C/UGT1A10/AMY1B/SI	CESC
KEGG_ECM_RECEPTOR_INTERACTION	KEGG_ECM_RECEPTOR_INTERACTION	84	0.606889	1.56623	0.037037	0.69697	0.689793	4063	tags=57%, list=21%, signal=46%	COL11A1/ITGA11/COMP/VTN/TNN/CD36/GP9/IBSP/FN1/ITGB3/GP6/THBS2/COL5A3/COL5A1/THBS1/THBS4/COL4A6/LAMA4/COL6A3/COL5A2/TNR/ITGA4/ITGA5/SDC2/COL1A2/COL6A2/LAMA3/ITGA1/LAMA2/TNC/COL3A1/LAMA1/COL6A6/COL1A1/SPP1/COL6A1/ITGB5/SV2A/LAMC2/ITGA2/ITGB7/VWF/LAMC3/COL4A2/ITGB6/SV2B/COL4A1/ITGA7	CESC
KEGG_NON_HOMOLOGOUS_END_JOINING	KEGG_NON_HOMOLOGOUS_END_JOINING	13	0.771328	1.49242	0.0408163	0.69697	0.689793	224	tags=8%, list=1%, signal=8%	DNTT	CESC
KEGG_FOCAL_ADHESION	KEGG_FOCAL_ADHESION	199	0.52029	1.47457	0.0166667	0.69697	0.689793	4433	tags=41%, list=23%, signal=32%	COL11A1/MYL2/MYL7/ITGA11/COMP/SHC3/VTN/SHC4/TNN/IBSP/FN1/MYLK/VEGFC/ITGB3/THBS2/COL5A3/COL5A1/THBS1/THBS4/FLNC/COL4A6/PRKCB/LAMA4/COL6A3/COL5A2/TNR/PAK3/PDGFRA/ITGA4/MYLPF/ITGA5/PIK3R5/FYN/MYL9/COL1A2/COL6A2/PDGFRB/LAMA3/CAV1/ITGA1/LAMA2/TNC/RASGRF1/COL3A1/AKT3/LAMA1/PIK3CG/COL6A6/COL1A1/SPP1/COL6A1/CCND1/PARVG/FLT4/PDGFB/ITGB5/PIK3CD/LAMC2/ITGA2/ITGB7/CAV2/VWF/LAMC3/COL4A2/ITGB6/FLT1/COL4A1/ITGA…	CESC
KEGG_CYTOKINE_CYTOKINE_RECEPTOR_INTERACTION	KEGG_CYTOKINE_CYTOKINE_RECEPTOR_INTERACTION	263	0.45827	1.33819	0.030303	0.69697	0.689793	3754	tags=47%, list=19%, signal=39%	IFNA16/IFNA10/IFNA13/CCL27/IFNK/TNFRSF8/IL2/IL9/CD70/INHBA/IL22RA2/TNFSF4/CCR3/IL11/CCL14/IL22/CSF2/CCR8/CCR4/XCR1/IFNA21/CCL11/CCL21/CXCR5/AMHR2/EDA2R/CXCL12/CCL1/TNFSF9/VEGFC/CCR6/TNFRSF13B/IL7R/CCL22/IFNL2/TNFRSF9/CCL17/IL23R/CCR7/IL10/IL12B/IL1A/IL9R/CCL19/CCL13/CCL26/CCL18/IL2RA/CX3CR1/GH1/IFNA2/FLT3/TNFSF11/LTA/IL21R/PPBP/PDGFRA/CD40LG/CCL3L3/IFNA6/PF4/CSF2RB/CRLF2/IL26/TGFB2/CCL3/TNFRSF4/I…	CESC
KEGG_CHEMOKINE_SIGNALING_PATHWAY	KEGG_CHEMOKINE_SIGNALING_PATHWAY	187	0.595122	1.52961	0.015625	0.71875	0.71875	3158	tags=35%, list=16%, signal=29%	PRKACG/CCR9/CXCR5/CCL7/CCL13/CCR4/CXCL13/PIK3CG/XCR1/CCR8/ITK/CXCR6/CCR6/CCR7/CCL11/PRKCB/DOCK2/CXCR3/NCF1/TIAM1/CCR2/CCR5/CCL18/GNB3/CCL19/CXCL11/PIK3R5/CCL22/CCL17/CCL23/GNGT1/JAK2/CCL4/CCR1/GNGT2/ADCY7/CCL4L2/VAV1/CCL26/CCL21/PIK3CD/CXCL9/XCL1/GNG2/CX3CR1/CXCL14/XCL2/FGR/GNB4/PLCB2/CCL3/JAK3/RASGRP2/GNG8/CCL28/CCL14/CXCL10/CCL8/HCK/WAS/GRK3/GRK7/ADCY8/AKT3/CCL5	CHOL
KEGG_CYTOKINE_CYTOKINE_RECEPTOR_INTERACTION	KEGG_CYTOKINE_CYTOKINE_RECEPTOR_INTERACTION	263	0.556784	1.51793	0.0144928	0.71875	0.71875	2866	tags=42%, list=15%, signal=36%	IFNA2/IFNA17/IFNA6/CCR9/IFNA1/GDF5/IFNE/IL9/GH1/TNFRSF13B/IFNB1/CXCR5/IL26/IFNG/TNFRSF9/CD70/CCL7/IL21/CCL13/TPO/TNFRSF17/CCR4/CXCL13/IL25/FASLG/TNF/IL21R/TNFSF8/XCR1/CCR8/CD40LG/CXCR6/CCR6/IFNL1/IL2RA/IL12B/CCR7/CCL11/IFNL2/IL7R/IL24/TNFSF18/CD27/CSF2RB/CXCR3/CSF2/IL12A/LTA/IL12RB1/CCR2/IL2RB/IL9R/CCR5/CCL18/IL10/CCL19/CXCL11/IL22RA2/IL5RA/IL20/IL2RG/CCL22/INHBA/CCL17/CCL23/IL2/EGF/LIFR/IL18RAP/…	CHOL
KEGG_CELL_ADHESION_MOLECULES_CAMS	KEGG_CELL_ADHESION_MOLECULES_CAMS	131	0.613058	1.4898	0.0151515	0.71875	0.71875	3896	tags=47%, list=20%, signal=38%	CLDN17/CDH3/CDH4/L1CAM/MAG/PDCD1LG2/ICOS/NCAM2/NRXN1/CADM3/CD28/CD40LG/ICAM3/NLGN4X/CD80/CD6/VCAM1/NEGR1/CD8B/CLDN8/ITGB7/PTPRC/SPN/NRXN3/CTLA4/ITGA4/MADCAM1/CD226/PDCD1/CD86/SELP/CD8A/HLA-DQA2/SIGLEC1/VCAN/CNTN1/CD2/CD274/HLA-DQA1/JAM2/ITGAL/ITGB2/HLA-DOB/CLDN11/ITGA9/HLA-DOA/SELPLG/CD4/JAM3/NFASC/NRCAM/ICOSLG/NRXN2/CLDN18/HLA-DPA1/ITGAM/ICAM2/CDH2/CNTNAP1/SELE/SELL/HLA-DQB1	CHOL
KEGG_NATURAL_KILLER_CELL_MEDIATED_CYTOTOXICITY	KEGG_NATURAL_KILLER_CELL_MEDIATED_CYTOTOXICITY	131	0.60921	1.48044	0.0151515	0.71875	0.71875	2304	tags=33%, list=12%, signal=29%	IFNA2/IFNA17/IFNA6/IFNA1/IFNB1/KLRC3/IFNG/PPP3R2/SH2D1A/CD244/NCR3/KLRC2/FASLG/TNF/KLRK1/PIK3CG/NCR1/PRKCB/KIR3DL2/CSF2/KLRC1/KIR2DL3/LCK/KIR3DL1/PIK3R5/KIR2DL4/KLRD1/ZAP70/SH2D1B/CD48/KIR2DL1/IFNA5/CD247/RAET1L/VAV1/PIK3CD/ULBP2/PRF1/NCR2/RAET1E/ITGAL/ITGB2/LCP2	CHOL
KEGG_PRIMARY_IMMUNODEFICIENCY	KEGG_PRIMARY_IMMUNODEFICIENCY	35	0.772429	1.55246	0.0454545	0.921646	0.921646	3155	tags=63%, list=16%, signal=53%	AIRE/TNFRSF13B/CD19/ICOS/CD40LG/IL7R/CD79A/CD8B/RAG2/PTPRC/LCK/BTK/IL2RG/ZAP70/CD3E/CD8A/CIITA/IGLL1/TNFRSF13C/JAK3/CD3D/CD4	CHOL
KEGG_OLFACTORY_TRANSDUCTION	KEGG_OLFACTORY_TRANSDUCTION	359	0.519858	1.44959	0.0273973	0.921646	0.921646	695	tags=17%, list=4%, signal=17%	OR1N2/OR1D2/OR56A3/OR8A1/OR56A5/OR2M4/OR1E1/OR2T2/OR9A4/OR6C70/OR52E6/OR1K1/OR52E4/OR2A12/OR11H6/OR10T2/OR56A4/OR51I2/OR10A2/OR6B1/OR7D4/OR52N5/OR52A5/OR52J3/OR4K1/OR52I2/OR2L2/OR5M10/PRKACG/OR4C12/OR9G1/OR6F1/OR13C9/OR7A17/OR10J1/OR10P1/OR51V1/OR51S1/OR52E2/OR13C3/OR5B3/OR6C68/OR6B2/OR4N2/CALML5/OR3A2/OR7C1/OR3A3/OR56B1/OR10G2/OR51B4/OR8G5/OR52N2/OR52N4/OR5M11/OR10A3/OR1Q1/OR10J3/OR13A1/OR2C3/OR…	CHOL
KEGG_HEDGEHOG_SIGNALING_PATHWAY	KEGG_HEDGEHOG_SIGNALING_PATHWAY	56	0.681781	1.4424	0.0428571	0.921646	0.921646	3815	tags=48%, list=19%, signal=39%	PRKACG/WNT7A/WNT1/WNT2/HHIP/WNT10B/CSNK1A1L/GAS1/WNT6/WNT16/GLI3/WNT2B/WNT8A/GLI1/BMP7/PTCH2/GLI2/RAB23/BMP6/DHH/PTCH1/WNT4/WNT10A/BMP8A/WNT5B/WNT7B/WNT5A	CHOL
KEGG_ANTIGEN_PROCESSING_AND_PRESENTATION	KEGG_ANTIGEN_PROCESSING_AND_PRESENTATION	80	0.624461	1.39485	0.0447761	0.921646	0.921646	2281	tags=29%, list=12%, signal=26%	IFNA2/IFNA17/IFNA6/IFNA1/KLRC4/KLRC3/KLRC2/KIR3DL2/LTA/KLRC1/KIR2DL3/CD8B/KIR3DL1/KIR2DL4/KIR3DL3/KLRD1/KIR2DL1/CD8A/IFNA5/HLA-DQA2/CIITA/HLA-DQA1/HLA-DOB	CHOL
KEGG_OLFACTORY_TRANSDUCTION	KEGG_OLFACTORY_TRANSDUCTION	359	0.709564	1.48404	0.00990099	1	1	1226	tags=45%, list=6%, signal=43%	OR2M4/OR5A2/OR4D9/OR2M7/OR2T34/OR6K2/OR6C4/OR4D10/OR4C46/OR51A2/OR14C36/OR6K6/OR5AP2/OR4M1/OR6N1/OR5J2/OR4B1/OR51S1/OR4A15/OR4K14/OR4F17/OR2Z1/OR10H3/OR10A7/OR8J1/OR51V1/OR2T1/OR5K1/OR4A16/OR4L1/OR2M2/OR10AG1/OR52M1/OR51A4/OR5T1/OR10J1/OR10K1/OR51F2/OR1S2/OR52E4/OR5M9/OR2T27/OR4Q3/OR2T6/OR10A3/OR10K2/OR14J1/OR4A5/OR6N2/OR8B12/OR2T5/OR7G3/OR11H1/OR4K15/OR6C6/OR2F2/OR4K2/OR7G2/OR4K17/OR5P2/OR5AK2/O…	COAD
KEGG_GLUTATHIONE_METABOLISM	KEGG_GLUTATHIONE_METABOLISM	48	0.740837	1.43775	0.0217391	1	1	408	tags=6%, list=2%, signal=6%	GSTA5/GPX5/GPX6	COAD
KEGG_CARDIAC_MUSCLE_CONTRACTION	KEGG_CARDIAC_MUSCLE_CONTRACTION	73	0.677948	1.36561	0.0309278	1	1	4454	tags=38%, list=23%, signal=30%	CACNG3/CACNG5/CACNG2/ATP1B4/COX6A2/CACNG7/COX8C/MYH6/ATP1A4/CACNA1S/MYL2/ACTC1/ATP1A2/MYH7/CACNG1/CACNG6/CACNA2D1/ATP1B2/CACNA2D3/ATP1A3/FXYD2/COX7A1/MYL3/SLC8A1/CACNA1C/COX4I2/CACNG8/CACNB4	COAD
KEGG_GRAFT_VERSUS_HOST_DISEASE	KEGG_GRAFT_VERSUS_HOST_DISEASE	37	0.698662	1.34554	0.0430108	1	1	5590	tags=81%, list=28%, signal=58%	KIR3DL1/KIR2DL3/KLRD1/KIR3DL2/KLRC1/KIR2DL1/CD86/CD80/IL2/CD28/IL1A/FASLG/HLA-DQA1/HLA-DOA/FAS/HLA-DMB/HLA-DQA2/IFNG/HLA-DPB1/HLA-DPA1/IL6/PRF1/HLA-DQB1/HLA-DOB/IL1B/TNF/HLA-DMA/HLA-DRB5/HLA-DRA/HLA-DRB1	COAD
KEGG_ASTHMA	KEGG_ASTHMA	28	0.705067	1.32406	0.0454545	1	1	5665	tags=93%, list=29%, signal=66%	IL13/MS4A2/FCER1A/IL10/PRG2/RNASE3/IL3/HLA-DQA1/HLA-DOA/HLA-DMB/HLA-DQA2/FCER1G/HLA-DPB1/HLA-DPA1/HLA-DQB1/HLA-DOB/TNF/IL9/HLA-DMA/HLA-DRB5/HLA-DRA/IL5/HLA-DRB1/CD40/IL4/CCL11	COAD
KEGG_NEUROACTIVE_LIGAND_RECEPTOR_INTERACTION	KEGG_NEUROACTIVE_LIGAND_RECEPTOR_INTERACTION	271	0.624306	1.29824	0.019802	1	1	3806	tags=48%, list=19%, signal=40%	HTR1A/CSH1/HTR1E/CHRNA4/HTR5A/GH2/GPR50/NPBWR2/CHRNA2/GABRG2/HRH3/SSTR4/AGTR2/ADRB3/CRHR1/LEP/DRD3/ADCYAP1R1/GABRA5/MC5R/MC2R/GRM5/TAAR1/GRIN2A/CGA/GLRA3/GALR1/FSHR/TAAR8/GHSR/HTR2B/LHCGR/CHRM2/MC4R/GABRG1/PRL/GLP1R/GRIA2/AGTR1/MAS1/MCHR1/TACR1/CHRNA3/SSTR3/GRIA1/CTSG/GH1/TAAR2/ADRA1A/PTGDR/CNR1/AVPR1B/CHRM4/CALCR/CHRNB4/PTH1R/CHRNB3/GLRB/GABRA6/P2RX2/GRIA3/GRIK5/RXFP1/CHRNB2/HTR6/NPBWR1/NMBR/HTR…	COAD
KEGG_OLFACTORY_TRANSDUCTION	KEGG_OLFACTORY_TRANSDUCTION	359	0.857716	1.61897	0.00990099	0.947917	0.947917	1800	tags=62%, list=9%, signal=58%	OR2T4/OR6C75/OR2G2/OR4D2/OR10G4/OR51I2/OR51L1/OR10H5/OR2G3/OR1A1/OR10G7/OR4A5/OR6B3/OR2T6/OR5M10/OR2M3/OR5AS1/OR6B1/OR8H3/OR2A12/OR10G9/OR8H1/OR52K1/OR5T1/OR2M2/OR13C3/OR4S2/OR52N1/OR4S1/OR5AP2/OR4C12/OR4Q3/OR4C11/OR8J1/OR5AC2/OR5J2/OR4N5/OR2L3/OR2L2/OR5D16/OR6C68/OR5T2/OR8K5/OR10C1/OR10J5/OR6C76/OR2F2/OR4K13/OR1A2/OR14C36/OR6C70/OR12D3/OR5F1/OR5P2/OR7D4/OR6C1/OR2T12/OR2T27/OR6K6/OR52A5/OR10AG1/O…	DLBC
KEGG_PORPHYRIN_AND_CHLOROPHYLL_METABOLISM	KEGG_PORPHYRIN_AND_CHLOROPHYLL_METABOLISM	40	0.805697	1.42849	0.0107527	0.947917	0.947917	1208	tags=28%, list=6%, signal=26%	UGT2B10/UGT1A5/UGT1A3/UGT2B28/UGT1A1/UGT2B11/UGT1A9/UGT2B4/UGT2A1/UGT1A7/FTMT	DLBC
KEGG_PENTOSE_AND_GLUCURONATE_INTERCONVERSIONS	KEGG_PENTOSE_AND_GLUCURONATE_INTERCONVERSIONS	28	0.805857	1.42483	0.0227273	0.947917	0.947917	1034	tags=36%, list=5%, signal=34%	UGT2B10/UGT1A5/UGT1A3/UGT2B28/UGT1A1/UGT2B11/UGT1A9/UGT2B4/UGT2A1/UGT1A7	DLBC
KEGG_DRUG_METABOLISM_OTHER_ENZYMES	KEGG_DRUG_METABOLISM_OTHER_ENZYMES	51	0.767525	1.39453	0.0206186	0.947917	0.947917	1158	tags=27%, list=6%, signal=26%	UGT2B10/UGT1A5/UGT1A3/UGT2B28/UGT1A1/CYP2A6/UGT2B11/UGT1A9/UGT2B4/CYP2A7/CYP3A4/UGT2A1/UGT1A7/NAT2	DLBC
KEGG_STARCH_AND_SUCROSE_METABOLISM	KEGG_STARCH_AND_SUCROSE_METABOLISM	50	0.734657	1.32749	0.03125	0.947917	0.947917	1052	tags=24%, list=5%, signal=23%	UGT2B10/UGT1A5/UGT1A3/UGT2B28/UGT1A1/UGT2B11/UGT1A9/UGT2B4/UGT2A1/SI/UGT1A7/G6PC2	DLBC
KEGG_NEUROACTIVE_LIGAND_RECEPTOR_INTERACTION	KEGG_NEUROACTIVE_LIGAND_RECEPTOR_INTERACTION	271	0.63552	1.19601	0.029703	0.947917	0.947917	3510	tags=42%, list=18%, signal=35%	MC3R/HTR2C/SSTR5/GABRG2/NPBWR1/MC2R/AGTR2/FSHB/OPRK1/TAAR2/HCRTR2/MC4R/GABRA6/PLG/OPRM1/PRLHR/HTR5A/CHRM2/NTSR2/GRM5/GHRHR/MC5R/GABRA1/GABRG3/RXFP2/DRD5/GABRG1/NMBR/CHRNB3/GALR1/HRH4/GLP1R/GRIK4/HTR6/NPY2R/F2/GABRR1/TACR3/SSTR4/MTNR1B/MLNR/CHRNA4/CRHR1/GRM3/GCGR/CSH1/GRIA1/ADRB3/GRM1/NPY1R/CHRNA6/TAAR6/NPY5R/GRIA2/CHRNA2/HTR1A/GRID2/GRIN2A/GABRB1/GRIK2/CHRM4/CHRM3/DRD3/HTR4/GABRD/ADCYAP1R1/HTR1E/…	DLBC
KEGG_ASCORBATE_AND_ALDARATE_METABOLISM	KEGG_ASCORBATE_AND_ALDARATE_METABOLISM	25	0.812513	1.41413	0.0465116	1	1	1034	tags=40%, list=5%, signal=38%	UGT2B10/UGT1A5/UGT1A3/UGT2B28/UGT1A1/UGT2B11/UGT1A9/UGT2B4/UGT2A1/UGT1A7	DLBC
KEGG_OLFACTORY_TRANSDUCTION	KEGG_OLFACTORY_TRANSDUCTION	359	0.829592	2.55398	0.011236	0.353846	0.32996	1554	tags=63%, list=8%, signal=59%	OR5M1/OR51A2/OR10G4/OR4A15/OR5L2/OR4S2/OR4F6/OR10G9/OR10Z1/OR2M5/OR4B1/OR14C36/OR13C4/OR4F15/OR8H3/OR4C15/OR2T6/OR2L13/OR7C2/OR2T12/OR9G1/OR8I2/OR4C13/OR5T1/OR5F1/OR2T2/OR2L2/OR8J1/OR8U1/OR4C46/OR10S1/OR5M9/OR5D14/OR11H1/OR2L3/OR3A3/OR1D5/OR6N1/OR5I1/OR6X1/OR5AS1/OR9G4/OR4M1/OR5V1/OR10H4/OR2AK2/OR4N2/OR7G3/OR52K1/OR51L1/OR2M2/OR6C4/OR6Q1/OR13F1/OR7A10/OR52J3/OR4C12/OR2M7/OR13C9/OR52E4/OR4D9/OR4D1…	ESCA
KEGG_MATURITY_ONSET_DIABETES_OF_THE_YOUNG	KEGG_MATURITY_ONSET_DIABETES_OF_THE_YOUNG	25	-0.825463	-2.01555	0.025641	0.353846	0.32996	1013	tags=72%, list=5%, signal=68%	HHEX/BHLHA15/MNX1/NR5A2/NKX2-2/INS/HNF4G/FOXA2/SLC2A2/FOXA3/NEUROG3/ONECUT1/HNF4A/HNF1A/HNF1B/PDX1/PAX4/NEUROD1	ESCA
KEGG_METABOLISM_OF_XENOBIOTICS_BY_CYTOCHROME_P450	KEGG_METABOLISM_OF_XENOBIOTICS_BY_CYTOCHROME_P450	68	-0.674393	-1.99892	0.03125	0.353846	0.32996	1508	tags=43%, list=8%, signal=40%	CYP2C18/ALDH3B1/GSTA1/GSTA2/ADH1B/UGT2B28/UGT1A10/ADH1A/UGT1A9/CYP2C8/CYP3A7/UGT2B17/CYP2E1/UGT2B11/CYP2C9/ADH6/AKR1C4/CYP3A5/ADH4/CYP2C19/UGT2A1/UGT1A8/CYP2B6/UGT2B7/CYP3A4/ADH1C/UGT2A3/UGT1A1/UGT2B15	ESCA
KEGG_DRUG_METABOLISM_CYTOCHROME_P450	KEGG_DRUG_METABOLISM_CYTOCHROME_P450	70	-0.672389	-1.98545	0.0333333	0.353846	0.32996	2139	tags=50%, list=11%, signal=45%	UGT2B4/AOX1/CYP2A7/FMO3/CYP2C18/ALDH3B1/GSTA1/GSTA2/ADH1B/UGT2B28/UGT1A10/ADH1A/UGT1A9/CYP2C8/CYP2A6/CYP3A7/UGT2B17/CYP2E1/UGT2B11/CYP2C9/ADH6/FMO5/CYP2A13/CYP3A5/ADH4/CYP2C19/UGT2A1/UGT1A8/CYP2B6/UGT2B7/CYP3A4/ADH1C/UGT2A3/UGT1A1/UGT2B15	ESCA
KEGG_PORPHYRIN_AND_CHLOROPHYLL_METABOLISM	KEGG_PORPHYRIN_AND_CHLOROPHYLL_METABOLISM	40	-0.683724	-1.82247	0.0277778	0.353846	0.32996	1065	tags=32%, list=5%, signal=31%	ALAS2/UGT2B28/UGT1A10/UGT1A9/CP/UGT2B17/UGT2B11/UGT2A1/UGT1A8/UGT2B7/UGT2A3/UGT1A1/UGT2B15	ESCA
KEGG_COMPLEMENT_AND_COAGULATION_CASCADES	KEGG_COMPLEMENT_AND_COAGULATION_CASCADES	69	-0.606712	-1.79055	0.03125	0.353846	0.32996	3455	tags=49%, list=18%, signal=41%	C4B/MASP2/C8G/CD55/SERPINC1/CFI/VWF/CPB2/C2/KNG1/CR1/C7/SERPIND1/TFPI/PROC/SERPINA1/MASP1/F2/CR2/KLKB1/F10/CFB/FGG/C6/FGB/FGA/F7/F5/SERPINA5/C8B/C4BPB/C4BPA/F11/C8A	ESCA
KEGG_RETINOL_METABOLISM	KEGG_RETINOL_METABOLISM	64	-0.615916	-1.7675	0.0322581	0.353846	0.32996	1508	tags=50%, list=8%, signal=46%	CYP2C18/ALDH1A1/RDH5/ALDH1A2/ADH1B/UGT2B28/BCO1/UGT1A10/ADH1A/UGT1A9/CYP2C8/CYP4A11/CYP2A6/CYP3A7/UGT2B17/RDH8/UGT2B11/CYP2C9/ADH6/CYP2A13/CYP3A5/ADH4/CYP2C19/UGT2A1/UGT1A8/CYP2B6/UGT2B7/CYP3A4/ADH1C/UGT2A3/UGT1A1/UGT2B15	ESCA
KEGG_ASCORBATE_AND_ALDARATE_METABOLISM	KEGG_ASCORBATE_AND_ALDARATE_METABOLISM	25	-0.719309	-1.75635	0.025641	0.353846	0.32996	1006	tags=44%, list=5%, signal=42%	UGT2B28/UGT1A10/UGT1A9/UGT2B17/UGT2B11/UGT2A1/UGT1A8/UGT2B7/UGT2A3/UGT1A1/UGT2B15	ESCA
KEGG_DRUG_METABOLISM_OTHER_ENZYMES	KEGG_DRUG_METABOLISM_OTHER_ENZYMES	51	-0.629746	-1.74415	0.037037	0.353846	0.32996	1495	tags=37%, list=8%, signal=35%	NAT1/UPB1/UGT2B28/UGT1A10/UGT1A9/CYP2A6/CYP3A7/UGT2B17/UGT2B11/CYP2A13/CYP3A5/NAT2/UGT2A1/UGT1A8/UGT2B7/CYP3A4/UGT2A3/UGT1A1/UGT2B15	ESCA
KEGG_NITROGEN_METABOLISM	KEGG_NITROGEN_METABOLISM	23	-0.727324	-1.73659	0.027027	0.353846	0.32996	2367	tags=48%, list=12%, signal=42%	AMT/HAL/CTH/CA7/CA14/CA13/CPS1/CA3/CA4/CA1/CA8	ESCA
KEGG_PENTOSE_AND_GLUCURONATE_INTERCONVERSIONS	KEGG_PENTOSE_AND_GLUCURONATE_INTERCONVERSIONS	28	-0.699683	-1.69483	0.0285714	0.353846	0.32996	1006	tags=50%, list=5%, signal=48%	CRYL1/XYLB/UGT2B4/UGT2B28/UGT1A10/UGT1A9/UGT2B17/UGT2B11/UGT2A1/UGT1A8/UGT2B7/UGT2A3/UGT1A1/UGT2B15	ESCA
KEGG_VASOPRESSIN_REGULATED_WATER_REABSORPTION	KEGG_VASOPRESSIN_REGULATED_WATER_REABSORPTION	44	-0.601363	-1.60555	0.0322581	0.353846	0.32996	2563	tags=18%, list=13%, signal=16%	CREB3L4/ADCY6/AQP4/CREB3L1/AVPR2/PRKACG/CREB3L3/AQP2	ESCA
KEGG_STARCH_AND_SUCROSE_METABOLISM	KEGG_STARCH_AND_SUCROSE_METABOLISM	50	-0.57916	-1.59209	0.0357143	0.353846	0.32996	1361	tags=34%, list=7%, signal=32%	AMY2B/G6PC2/ENPP1/UGT2B28/UGT1A10/UGT1A9/TREH/UGT2B17/UGT2B11/MGAM/UGT2A1/UGT1A8/UGT2B7/SI/UGT2A3/UGT1A1/UGT2B15	ESCA
KEGG_CYTOSOLIC_DNA_SENSING_PATHWAY	KEGG_CYTOSOLIC_DNA_SENSING_PATHWAY	54	0.620771	1.58342	0.0131579	0.353846	0.32996	2507	tags=24%, list=13%, signal=21%	IFNA17/IFNA10/IFNA4/IFNA1/IFNA7/IFNA8/IFNB1/AIM2/IFNA16/IFNA14/POLR3G/IFNA6/CXCL10	ESCA
KEGG_PEROXISOME	KEGG_PEROXISOME	78	-0.526544	-1.57425	0.0333333	0.353846	0.32996	5242	tags=50%, list=27%, signal=37%	ACSL4/DDO/ECH1/ECI2/HACL1/AMACR/ACOT8/PEX7/PXMP2/ACAA1/HMGCL/SCP2/IDH1/CAT/ABCD1/PEX11G/ABCD4/DECR2/ACOX2/ACOX1/PHYH/ABCD3/EPHX2/ABCD2/PEX1/MLYCD/NUDT12/PEX11A/ACSL6/PECR/PIPOX/MPV17L/FAR2/ACSL5/SLC27A2/HAO2/BAAT/NOS2/AGXT	ESCA
KEGG_STEROID_HORMONE_BIOSYNTHESIS	KEGG_STEROID_HORMONE_BIOSYNTHESIS	55	-0.560526	-1.53497	0.0384615	0.353846	0.32996	2572	tags=49%, list=13%, signal=43%	CYP3A43/CYP7A1/SRD5A2/UGT2B4/HSD11B2/SULT1E1/HSD17B3/STS/CYP21A2/UGT2B28/UGT1A10/UGT1A9/CYP3A7/UGT2B17/HSD17B2/UGT2B11/AKR1C4/CYP3A5/UGT2A1/CYP17A1/UGT1A8/UGT2B7/CYP3A4/HSD3B2/UGT2A3/UGT1A1/UGT2B15	ESCA
KEGG_PPAR_SIGNALING_PATHWAY	KEGG_PPAR_SIGNALING_PATHWAY	69	-0.515827	-1.52232	0.03125	0.353846	0.32996	1981	tags=32%, list=10%, signal=29%	FABP6/CYP27A1/NR1H3/SLC27A5/ACSL6/CYP7A1/GK/PLIN1/CYP4A22/ACSL5/APOA5/SLC27A2/CYP4A11/PPARG/APOA1/APOC3/APOA2/HMGCS2/AQP7/FABP2/FABP1/PCK1	ESCA
KEGG_ABC_TRANSPORTERS	KEGG_ABC_TRANSPORTERS	44	-0.562837	-1.5027	0.0322581	0.353846	0.32996	1877	tags=30%, list=10%, signal=27%	ABCA9/ABCA10/ABCB1/ABCC3/ABCG2/ABCB4/ABCA8/ABCC6/ABCC2/ABCC8/CFTR/ABCG5/ABCG8	ESCA
KEGG_RIG_I_LIKE_RECEPTOR_SIGNALING_PATHWAY	KEGG_RIG_I_LIKE_RECEPTOR_SIGNALING_PATHWAY	70	0.558955	1.47758	0.0277778	0.353846	0.32996	2507	tags=21%, list=13%, signal=19%	IFNA17/IFNA10/IFNA4/IFNA1/IFNA7/IFNA8/IFNB1/IFNA16/IFNE/MAPK12/IFNA14/IFNK/MAPK11/IFNA6/CXCL10	ESCA
KEGG_FATTY_ACID_METABOLISM	KEGG_FATTY_ACID_METABOLISM	42	-0.557164	-1.45626	0.0285714	0.353846	0.32996	3304	tags=31%, list=17%, signal=26%	ACADS/ACADSB/ACSL6/ALDH2/ACAA2/CYP4A22/ACSL5/ADH1B/ADH1A/CYP4A11/ADH6/ADH4/ADH1C	ESCA
KEGG_REGULATION_OF_AUTOPHAGY	KEGG_REGULATION_OF_AUTOPHAGY	35	0.634485	1.50863	0.0434783	0.380952	0.355236	2457	tags=29%, list=13%, signal=25%	IFNA17/IFNA10/IFNA4/IFNA1/IFNA7/IFNA8/IFNA16/IFNA14/IFNG/IFNA6	ESCA
KEGG_OLFACTORY_TRANSDUCTION	KEGG_OLFACTORY_TRANSDUCTION	359	-0.677752	-1.76995	0.00990099	0.321053	0.321053	2395	tags=54%, list=12%, signal=48%	OR5F1/OR2B6/OR56A4/OR8H3/OR10G7/OR2B11/OR1J2/OR10G2/OR52H1/OR2T12/OR1A2/OR5AU1/OR13F1/OR51F2/OR2D2/OR10H2/OR5T2/OR13C2/OR10A2/OR6T1/CNGA4/OR52N4/OR4N2/OR11L1/OR2C1/OR2T34/OR1E1/OR3A3/OR52I1/OR51A7/CALML6/OR11A1/OR7G2/OR11H1/OR4K5/OR2H1/OR6C3/OR2C3/OR9K2/OR2A4/OR51I2/OR6C75/OR4K15/OR52J3/OR52N5/OR4Q3/OR1J1/OR6S1/OR6C65/OR2A42/OR4F15/OR6B2/OR6K6/OR10A4/PRKACG/OR10T2/OR13C8/OR52N1/OR2B3/OR51D1/OR6N2…	HNSC
KEGG_DRUG_METABOLISM_CYTOCHROME_P450	KEGG_DRUG_METABOLISM_CYTOCHROME_P450	70	-0.682396	-1.65672	0.0103093	0.321053	0.321053	4391	tags=57%, list=22%, signal=45%	UGT1A1/FMO2/ADH7/ALDH3A1/GSTM4/ADH4/UGT2B7/UGT2B15/CYP3A5/MGST1/CYP2C8/CYP3A7/GSTM2/UGT1A3/CYP2C9/CYP3A43/UGT1A6/CYP2D6/UGT1A7/FMO3/CYP1A2/ADH6/UGT1A9/ADH1A/CYP2C19/GSTA1/GSTA5/CYP2A7/CYP2B6/UGT1A5/ADH1C/CYP2E1/UGT2B11/UGT1A4/CYP2A6/UGT1A8/GSTA2/CYP2A13/UGT2A1/UGT2B28	HNSC
KEGG_METABOLISM_OF_XENOBIOTICS_BY_CYTOCHROME_P450	KEGG_METABOLISM_OF_XENOBIOTICS_BY_CYTOCHROME_P450	68	-0.671194	-1.61903	0.0104167	0.321053	0.321053	4391	tags=53%, list=22%, signal=41%	UGT1A1/ADH7/ALDH3A1/GSTM4/ADH4/UGT2B7/UGT2B15/CYP3A5/MGST1/CYP2C8/CYP3A7/GSTM2/UGT1A3/CYP2C9/CYP1A1/CYP3A43/UGT1A6/UGT1A7/CYP1A2/ADH6/UGT1A9/ADH1A/CYP2C19/GSTA1/GSTA5/CYP2B6/UGT1A5/ADH1C/CYP2E1/UGT2B11/UGT1A4/UGT1A8/CYP2F1/GSTA2/UGT2A1/UGT2B28	HNSC
KEGG_STARCH_AND_SUCROSE_METABOLISM	KEGG_STARCH_AND_SUCROSE_METABOLISM	50	-0.664024	-1.53709	0.0105263	0.321053	0.321053	2013	tags=30%, list=10%, signal=27%	UGT1A6/UGT1A7/ENPP3/TREH/UGT1A9/G6PC2/AMY2B/UGT1A5/UGT2B11/UGT1A4/UGT1A8/GCK/UGT2A1/UGT2B28/AMY1C	HNSC
KEGG_RETINOL_METABOLISM	KEGG_RETINOL_METABOLISM	64	-0.602183	-1.42689	0.0104167	0.321053	0.321053	4391	tags=56%, list=22%, signal=44%	UGT1A1/ADH7/ADH4/UGT2B7/UGT2B15/CYP3A5/CYP2C8/CYP3A7/ALDH1A1/CYP26A1/BCO1/UGT1A3/CYP2C9/CYP1A1/CYP3A43/UGT1A6/UGT1A7/CYP1A2/ADH6/AWAT2/UGT1A9/ADH1A/CYP2C19/CYP26C1/CYP2A7/CYP2B6/UGT1A5/ADH1C/UGT2B11/UGT1A4/CYP2A6/UGT1A8/CYP4A22/CYP2A13/UGT2A1/UGT2B28	HNSC
KEGG_NEUROACTIVE_LIGAND_RECEPTOR_INTERACTION	KEGG_NEUROACTIVE_LIGAND_RECEPTOR_INTERACTION	271	-0.502926	-1.28805	0.00990099	0.321053	0.321053	3460	tags=35%, list=18%, signal=30%	GLRA1/TRPV1/MC5R/P2RY10/PTGER1/NMUR2/PRL/P2RY8/CCKAR/GPR156/TACR1/NPFFR2/GCGR/NMBR/TAAR5/HTR5A/CGA/HCRTR1/GABRQ/GH1/SSTR3/CHRNA3/ADRB1/MLNR/TACR3/PLG/GRIN3A/CHRNA4/NTSR2/CCKBR/GRIK4/HRH4/TACR2/LHCGR/HTR6/PTH2R/GRIN2B/GRIA2/CNR1/GABRA6/CNR2/ADORA2A/CHRNA6/GALR3/SCTR/HTR1A/ADRB3/GLRA2/NMUR1/AVPR1B/PRLHR/SSTR2/MC2R/GABRP/CRHR2/CHRM1/HTR1E/GABRG2/VIPR2/SSTR5/P2RX2/PRSS2/ADRA2B/CRHR1/GRID2/HTR4/GABRB2…	HNSC
KEGG_ASCORBATE_AND_ALDARATE_METABOLISM	KEGG_ASCORBATE_AND_ALDARATE_METABOLISM	25	-0.703889	-1.50425	0.0344828	0.901478	0.901478	2502	tags=44%, list=13%, signal=38%	UGT1A3/UGT1A6/UGT1A7/UGT1A9/UGT1A5/UGT2B11/UGT1A4/MIOX/UGT1A8/UGT2A1/UGT2B28	HNSC
KEGG_ANTIGEN_PROCESSING_AND_PRESENTATION	KEGG_ANTIGEN_PROCESSING_AND_PRESENTATION	80	-0.543418	-1.30208	0.0425532	0.973404	0.973404	3266	tags=25%, list=17%, signal=21%	CIITA/KLRC1/CD8A/KIR2DL1/KLRD1/CD8B/LTA/IFNA13/IFNA21/KIR2DL4/KLRC2/IFNA16/KLRC4/KIR3DL1/IFNA7/KIR3DL3/KLRC3/KIR3DL2/KIR2DL3/IFNA4	HNSC
KEGG_PORPHYRIN_AND_CHLOROPHYLL_METABOLISM	KEGG_PORPHYRIN_AND_CHLOROPHYLL_METABOLISM	40	-0.769795	-1.69466	0.0333333	0.681481	0.670565	410	tags=30%, list=2%, signal=29%	UGT2B7/UGT1A3/ALAS2/UGT1A6/UGT1A8/UGT1A4/UGT1A7/UGT2B10/UGT2B15/UGT1A1/UGT1A10/FTMT	KICH
KEGG_AUTOIMMUNE_THYROID_DISEASE	KEGG_AUTOIMMUNE_THYROID_DISEASE	50	0.762459	1.58999	0.0140845	0.681481	0.670565	2078	tags=32%, list=11%, signal=29%	IFNA7/IFNA13/IFNA10/IFNA14/IFNA21/IFNA2/IL10/IFNA1/CGA/TSHB/IL5/IFNA5/CD28/FASLG/TPO/CD40LG	KICH
KEGG_CYTOSOLIC_DNA_SENSING_PATHWAY	KEGG_CYTOSOLIC_DNA_SENSING_PATHWAY	54	0.745039	1.5657	0.0142857	0.681481	0.670565	1493	tags=17%, list=8%, signal=15%	IFNA7/IFNA13/IFNA10/IFNA14/IFNA21/IFNA2/IL6/IFNA1/ZBP1	KICH
KEGG_RIG_I_LIKE_RECEPTOR_SIGNALING_PATHWAY	KEGG_RIG_I_LIKE_RECEPTOR_SIGNALING_PATHWAY	70	0.732002	1.56531	0.028169	0.681481	0.670565	1895	tags=17%, list=10%, signal=16%	IFNA7/IFNA13/IFNA10/IFNA14/IFNA21/IFNA2/IFNK/IFNW1/IFNA1/CXCL8/IL12A/IFNA5	KICH
KEGG_ANTIGEN_PROCESSING_AND_PRESENTATION	KEGG_ANTIGEN_PROCESSING_AND_PRESENTATION	80	0.720168	1.5591	0.0294118	0.681481	0.670565	2241	tags=18%, list=11%, signal=16%	IFNA7/IFNA13/IFNA10/IFNA14/IFNA21/KLRC2/IFNA2/KIR2DL1/IFNA1/LTA/KLRC4/IFNA5/KIR2DL4/KLRD1	KICH
KEGG_PARKINSONS_DISEASE	KEGG_PARKINSONS_DISEASE	100	0.696092	1.55794	0.0142857	0.681481	0.670565	1510	tags=6%, list=8%, signal=6%	COX7B2/TH/SLC18A1/COX6B2/COX6A2/SNCAIP	KICH
KEGG_REGULATION_OF_AUTOPHAGY	KEGG_REGULATION_OF_AUTOPHAGY	35	0.815335	1.55455	0.0153846	0.681481	0.670565	1407	tags=29%, list=7%, signal=27%	IFNA7/IFNA13/IFNA10/IFNA14/BECN2/IFNA21/INS/IFNA2/IFNA1/IFNG	KICH
KEGG_PENTOSE_AND_GLUCURONATE_INTERCONVERSIONS	KEGG_PENTOSE_AND_GLUCURONATE_INTERCONVERSIONS	28	-0.717843	-1.48037	0.0285714	0.681481	0.670565	410	tags=39%, list=2%, signal=39%	UGT2B17/UGT2B7/UGT1A3/UGT1A6/UGT1A8/UGT1A4/UGT1A7/UGT2B10/UGT2B15/UGT1A1/UGT1A10	KICH
KEGG_ARGININE_AND_PROLINE_METABOLISM	KEGG_ARGININE_AND_PROLINE_METABOLISM	54	-0.603572	-1.41969	0.03125	0.681481	0.670565	2754	tags=24%, list=14%, signal=21%	AGMAT/GAMT/NOS3/GLUD2/CKM/AZIN2/CPS1/OTC/NOS2/NOS1/AOC1/MAOB/PRODH	KICH
KEGG_TOLL_LIKE_RECEPTOR_SIGNALING_PATHWAY	KEGG_TOLL_LIKE_RECEPTOR_SIGNALING_PATHWAY	102	0.629602	1.41586	0.0434783	0.713178	0.701754	2663	tags=17%, list=14%, signal=14%	IFNA7/IFNA13/IFNA10/IFNA14/IFNA21/LBP/IFNA2/IL6/IFNA1/CXCL8/IL12A/IFNA5/CTSK/IL1B/CXCL11/TLR8/CCL3	KICH
KEGG_OLFACTORY_TRANSDUCTION	KEGG_OLFACTORY_TRANSDUCTION	359	0.53577	1.3433	0.043956	0.713178	0.701754	1209	tags=30%, list=6%, signal=28%	OR1E1/OR56A3/OR8G5/OR1E2/OR2Z1/OR2T6/OR52N5/OR6X1/OR6B1/OR52K2/OR10A2/OR5B3/OR5AP2/OR10V1/OR4D11/OR7A10/OR51I2/OR2T27/OR4C13/OR8H1/OR5A1/OR7D4/OR6S1/OR8G1/OR51B6/OR4F3/OR10A7/OR13F1/OR2T3/OR2T2/OR2B3/OR6C68/OR4F5/OR5H2/OR10K2/OR52M1/OR1S2/OR5M1/OR10A4/OR4S1/OR6B3/OR6C1/OR14J1/OR5T1/OR56A1/OR9G4/OR13C3/OR3A3/OR6A2/OR52N2/OR1L4/OR51S1/CAMK2A/OR52I2/OR2D2/OR51I1/OR9Q1/CLCA4/GUCA1C/OR51B4/OR6V1/OR10H…	KICH
KEGG_CYTOKINE_CYTOKINE_RECEPTOR_INTERACTION	KEGG_CYTOKINE_CYTOKINE_RECEPTOR_INTERACTION	263	0.526668	1.31307	0.0465116	0.713178	0.701754	3462	tags=41%, list=18%, signal=35%	IFNA7/IFNA13/IFNA10/CCL27/IFNA14/LEP/IL25/IL23R/CXCL5/IFNA21/CCL1/IL22RA2/CSF2/PRL/CCL7/IL21/CCL13/IL13/IL19/IL22RA1/TNFRSF13B/GH1/CCL26/EDAR/CXCR5/IFNA2/IFNK/IL6/CCL17/BMP7/TNFRSF17/IL10/IL20/IFNW1/IL9R/IFNA1/IL22/IL26/IFNG/CCL18/TNFSF14/CCL22/IL11/IL20RA/CXCL8/IL21R/IFNL1/CXCL3/CCL23/CCL24/IL12A/LTA/OSM/IL5/TNFRSF18/IL24/IFNA5/IL5RA/CNTFR/IL18R1/FASLG/AMH/CXCR3/TPO/CCR7/CD40LG/CCR4/CXCL13/CXCL2…	KICH
KEGG_NON_HOMOLOGOUS_END_JOINING	KEGG_NON_HOMOLOGOUS_END_JOINING	13	-0.774211	-1.80492	0.0434783	0.861277	0.861277	1154	tags=15%, list=6%, signal=14%	NHEJ1/DNTT	KIRC
KEGG_OLFACTORY_TRANSDUCTION	KEGG_OLFACTORY_TRANSDUCTION	359	0.719129	1.571	0.00990099	0.861277	0.861277	2068	tags=52%, list=11%, signal=48%	OR2M2/OR1A2/OR51A4/OR7C2/OR2M3/OR4C6/OR4D5/OR8H1/OR10R2/OR2Z1/OR4M1/OR10G9/OR2G3/OR5M11/OR10H3/OR14C36/OR1D2/OR2F2/OR10Z1/OR8K1/OR4K13/OR52A1/OR5H2/OR5T3/OR52E6/OR4C15/OR10G3/OR51V1/OR8B12/OR5J2/OR10H1/OR56A3/CNGA3/OR7D4/OR4C12/OR56A5/OR14J1/OR5F1/OR5M3/OR2M7/OR51F2/GUCA1A/OR7G1/OR4C13/OR5AP2/OR5AC2/OR1I1/OR9G1/OR8J1/OR1E2/OR4Q3/OR2Y1/OR9G4/OR4D10/OR1K1/OR10H2/OR4N2/OR13A1/OR52E4/OR51D1/OR4F17/OR…	KIRC
KEGG_TERPENOID_BACKBONE_BIOSYNTHESIS	KEGG_TERPENOID_BACKBONE_BIOSYNTHESIS	15	-0.644239	-1.51499	0.047619	0.861277	0.861277	4714	tags=60%, list=24%, signal=46%	MVD/PMVK/DHDDS/HMGCR/IDI1/HMGCS1/PDSS2/ACAT1/HMGCS2	KIRC
KEGG_TASTE_TRANSDUCTION	KEGG_TASTE_TRANSDUCTION	51	0.68887	1.43951	0.0333333	0.861277	0.861277	4465	tags=55%, list=23%, signal=43%	CACNA1B/TAS2R39/PRKACG/TAS1R2/GRM4/GNB3/SCNN1G/ASIC2/TAS2R16/SCNN1B/TAS2R60/TAS1R3/TAS2R42/GNAT3/TAS2R40/TAS2R7/TAS1R1/TAS2R9/TAS2R20/ADCY8/TAS2R8/TAS2R19/KCNB1/CACNA1A/TAS2R31/TAS2R10/PLCB2/ITPR3	KIRC
KEGG_MATURITY_ONSET_DIABETES_OF_THE_YOUNG	KEGG_MATURITY_ONSET_DIABETES_OF_THE_YOUNG	25	0.74562	1.39659	0.0465116	0.861277	0.861277	1658	tags=40%, list=8%, signal=37%	IAPP/NEUROD1/INS/ONECUT1/GCK/PAX4/MNX1/NKX2-2/NEUROG3/FOXA2	KIRC
KEGG_CYTOKINE_CYTOKINE_RECEPTOR_INTERACTION	KEGG_CYTOKINE_CYTOKINE_RECEPTOR_INTERACTION	263	0.579132	1.27025	0.00990099	0.861277	0.861277	4798	tags=49%, list=24%, signal=38%	GH2/CSF2/IL22RA2/IL11/CCL7/IFNL2/IL21/IL6/IL22/IFNL3/LEP/CCL11/IL20RB/CCL13/CRLF2/CSF3/IL17A/IFNA13/CXCL5/CXCR5/IL2RA/CCL25/IL1R2/CXCL3/GDF5/IFNB1/CCL26/IFNL1/IFNE/CXCL13/AMH/CCR8/INHBE/IL4/TNFRSF13B/CXCL8/IL9R/OSM/TNFRSF18/TNFRSF13C/CCL1/AMHR2/PDGFRA/TNFRSF17/IFNA4/IFNA6/IL2/LIF/TNFSF14/CCR6/IL10/PF4/TNFRSF11A/CCL19/IL1A/CCL18/IL23R/CXCL1/CCR9/CCL21/CCL24/INHBA/IFNG/TPO/IL13/EPO/CCR3/IL26/TNFRSF…	KIRC
KEGG_OLFACTORY_TRANSDUCTION	KEGG_OLFACTORY_TRANSDUCTION	359	0.796653	1.55701	0.00990099	0.891089	0.891089	1922	tags=60%, list=10%, signal=55%	OR10G9/OR5M9/OR2M3/OR6C75/OR6C76/OR5H2/OR6C4/OR10Z1/OR2J2/OR10G4/OR4C13/OR4A15/OR4P4/OR4C11/OR5T2/OR2T27/OR8H2/OR5L2/OR5D16/OR5M10/OR8G1/OR6Q1/OR14C36/OR6B3/OR8K1/OR11H1/OR9G1/OR10G3/OR4K15/OR5F1/OR4C46/OR2M4/OR6M1/OR56A3/OR6X1/OR4D9/OR51D1/OR4M1/OR1D2/OR5AS1/OR4C15/OR4D5/OR10J1/OR51V1/OR52M1/OR5J2/OR5B17/OR2F2/OR52A1/OR4D2/OR4K5/OR10J5/OR52E6/OR1A2/CLCA4/GUCA1A/OR4N2/OR12D3/OR6N2/CLCA2/OR6K6/OR1…	KIRP
KEGG_CYTOKINE_CYTOKINE_RECEPTOR_INTERACTION	KEGG_CYTOKINE_CYTOKINE_RECEPTOR_INTERACTION	263	0.605542	1.17476	0.00990099	0.891089	0.891089	4071	tags=43%, list=21%, signal=34%	IFNL2/GH2/IL22RA2/IFNA14/CXCL13/CCL1/IFNA4/IFNG/IL3/CCR8/IL22/CXCR5/IFNA17/IFNB1/IL9R/IFNA21/IFNL3/TNFRSF13C/CRLF2/IL2/IL21R/CCR3/INHBA/AMHR2/IFNA6/IL12B/PDGFRA/GH1/IL13/IL12A/TNFRSF13B/CCR4/CCL19/CXCL11/PRL/CCL25/LTA/XCR1/FASLG/IL23R/IL26/IL20RB/XCL1/TNFSF11/TNFRSF9/IFNA2/IFNA5/TNFRSF17/IL25/IL11/IL20/CSF2/CCL21/IL6/IL21/IL2RA/CXCL9/CCR7/IL1A/TPO/IFNA13/IFNA7/IL2RB/IL17A/CXCR3/CCR6/CXCR2/TGFB2/C…	KIRP
KEGG_PROTEASOME	KEGG_PROTEASOME	44	0.729855	1.33209	0.030303	1	1	2204	tags=7%, list=11%, signal=6%	IFNG/PSMA8/PSMB11	KIRP
KEGG_AUTOIMMUNE_THYROID_DISEASE	KEGG_AUTOIMMUNE_THYROID_DISEASE	50	0.689742	1.28143	0.04	1	1	3826	tags=46%, list=20%, signal=37%	IFNA14/IFNA4/IFNA17/IFNA21/IL2/IFNA6/CTLA4/CGA/TSHR/FASLG/IFNA2/IFNA5/CD80/GZMB/TPO/IFNA13/IFNA7/HLA-DOB/CD40LG/IFNA16/CD28/TSHB/PRF1	KIRP
KEGG_JAK_STAT_SIGNALING_PATHWAY	KEGG_JAK_STAT_SIGNALING_PATHWAY	155	0.624754	1.18531	0.049505	1	1	3576	tags=33%, list=18%, signal=27%	CSH1/IFNL2/GH2/IL22RA2/IFNA14/IFNA4/IFNG/IL3/IL22/IFNA17/IFNB1/IL9R/IFNA21/IFNL3/CRLF2/IL2/IL21R/IFNA6/IL12B/GH1/IL13/IL12A/IL13RA2/PRL/IL23R/IL26/IL20RB/IFNA2/IFNA5/IL11/IL20/CSF2/PIK3CG/IL6/IL21/IL2RA/TPO/IFNA13/IFNA7/IL2RB/IFNW1/IL19/IFNL1/IL9/LEP/CSF2RB/IL24/IFNA16/IL7R/STAT4/IL12RB1	KIRP
KEGG_NEUROACTIVE_LIGAND_RECEPTOR_INTERACTION	KEGG_NEUROACTIVE_LIGAND_RECEPTOR_INTERACTION	271	0.580685	1.12611	0.029703	1	1	4547	tags=56%, list=23%, signal=44%	CSH1/MC2R/GH2/LPAR3/TAAR2/HTR5A/CHRM2/GABRA3/TACR3/NPY4R/DRD1/MC3R/GRM7/GABRG2/RXFP2/ADRB3/P2RX2/GHSR/TRHR/CNR2/HTR2C/FSHB/GABRA1/GABRR1/PRLHR/NMUR2/DRD3/TAAR5/GLRA1/BRS3/GABRA5/MC4R/CHRND/GLRA3/AVPR2/P2RX6/HTR1A/GABRA2/GPR50/GRIK2/HTR1F/ADRB1/MAS1/ADRA1D/P2RY10/NPBWR1/P2RX3/GH1/GLP1R/CGA/GLP2R/TSHR/GABRE/PRSS3/PRL/GRM2/MTNR1B/ADCYAP1R1/OPRM1/NPFFR1/PRSS2/CHRNA5/GRIK4/GRM4/HTR2B/GALR3/PTGFR/P2RX5…	KIRP
KEGG_LEISHMANIA_INFECTION	KEGG_LEISHMANIA_INFECTION	69	-0.679255	-1.5158	0.0273973	1	1	4172	tags=58%, list=21%, signal=46%	FOS/HLA-DRB1/NCF4/HLA-DRA/HLA-DRB5/CYBA/HLA-DOB/TGFB1/FCGR1A/HLA-DPB1/HLA-DMA/ITGA4/MAPK13/ITGB2/HLA-DPA1/PTGS2/C3/NCF2/MYD88/PTPN6/TLR4/FCGR3B/ITGAM/HLA-DMB/HLA-DQB1/FCGR3A/TLR2/TNF/FCGR2A/HLA-DOA/HLA-DQA1/CR1/NCF1/IL1B/TGFB2/HLA-DQA2/IL1A/IFNG/IL10/IL12B	LGG
KEGG_MELANOMA	KEGG_MELANOMA	71	-0.679411	-1.5037	0.0277778	1	1	2151	tags=24%, list=11%, signal=21%	PIK3CD/PIK3R5/MET/EGF/IGF1/FGF4/CDH1/FGF20/PDGFD/PIK3CG/HGF/FGF10/FGF21/FGF7/FGF16/FGF19/FGF3	LGG
KEGG_RIBOSOME	KEGG_RIBOSOME	87	0.569721	1.45422	0.0322581	1	1	7221	tags=89%, list=37%, signal=56%	RPS4Y1/RPL22L1/RPL36A/RPL7/RPL17/RPS29/RPL39/RPS24/RPS3/RPL21/RPL36/RPL38/RPL37/RPL31/RPS13/RPSA/RPS25/RPL37A/RPS15A/RPL3L/RPL26/RPL18A/RPL6/RPL10/RPS6/RPL10A/RPL29/RPS4X/RPS3A/RPL34/RPL32/RPL36AL/RPS23/RPL14/RPL3/RPL4/RPS27A/RPL7A/RPS20/RPL23/RPL13/RPLP2/RPS28/RPL15/RPL24/RPL30/RPS12/RPL12/RPL23A/RPL27A/RPS10/FAU/RPS9/RSL24D1/RPL8/RPL9/RPS21/RPS15/RPS5/RPS18/RPLP0/RPS26/RPL41/RPS17/RPL27/RPL26L1…	LGG
KEGG_PRIMARY_IMMUNODEFICIENCY	KEGG_PRIMARY_IMMUNODEFICIENCY	35	0.755234	1.60616	0.0104167	0.160526	0.154201	2752	tags=60%, list=14%, signal=52%	AICDA/TNFRSF13B/ICOS/CD19/CD79A/TNFRSF13C/IGLL1/CD8B/JAK3/CD8A/AIRE/ZAP70/LCK/BTK/IL7R/PTPRC/CD3E/CD3D/IL2RG/CD40LG/CIITA	LIHC
KEGG_GRAFT_VERSUS_HOST_DISEASE	KEGG_GRAFT_VERSUS_HOST_DISEASE	37	0.683402	1.44978	0.0105263	0.160526	0.154201	4168	tags=62%, list=21%, signal=49%	IFNG/IL2/TNF/CD80/FASLG/KLRC1/KIR3DL2/IL1A/IL6/KIR2DL3/IL1B/GZMB/HLA-DOB/KIR3DL1/CD86/KLRD1/KIR2DL1/HLA-DOA/CD28/HLA-DQA2/HLA-DQA1/PRF1/HLA-DMB	LIHC
KEGG_T_CELL_RECEPTOR_SIGNALING_PATHWAY	KEGG_T_CELL_RECEPTOR_SIGNALING_PATHWAY	108	0.612902	1.41158	0.01	0.160526	0.154201	3383	tags=32%, list=17%, signal=27%	PAK5/IFNG/PPP3R2/ICOS/IL2/CTLA4/IL4/PDCD1/TNF/CD8B/CD3G/RASGRP1/PAK6/PRKCQ/ITK/PIK3CG/CSF2/CARD11/IL10/CD8A/ZAP70/LAT/LCK/PIK3R5/VAV1/PIK3CD/PTPRC/CD3E/CD3D/CD40LG/CD247/LCP2/MAPK13/CD28/VAV3	LIHC
KEGG_HEMATOPOIETIC_CELL_LINEAGE	KEGG_HEMATOPOIETIC_CELL_LINEAGE	85	0.607863	1.37336	0.0102041	0.160526	0.154201	3816	tags=49%, list=19%, signal=40%	CR2/CD1A/IL11/MS4A1/CD19/CD1B/IL4/IL9R/TNF/CR1/FCGR1A/CD8B/CD3G/IL2RA/CSF3R/CSF2/IL1A/CD38/CD22/CD8A/CD5/CD1E/FLT3/IL6/FCER2/ITGA3/ITGA4/IL1B/IL7R/CD3E/CD3D/CD2/CD37/CD33/GP1BA/ITGAM/CD7/CD1C/EPO/ITGA2/CSF2RA/DNTT	LIHC
KEGG_CYTOKINE_CYTOKINE_RECEPTOR_INTERACTION	KEGG_CYTOKINE_CYTOKINE_RECEPTOR_INTERACTION	263	0.579665	1.37077	0.00990099	0.160526	0.154201	4337	tags=49%, list=22%, signal=38%	IFNA17/IFNA13/IFNA16/IFNE/IL21/IL22RA2/CCL7/CXCR5/IFNL2/IFNA21/IFNA6/TNFRSF17/IFNB1/IFNG/IL11/IFNA1/CCR8/TNFRSF13B/IL21R/IL9/IFNA14/IFNW1/IL22/IL2/BMPR1B/CXCL5/IFNL3/IL4/TNFRSF13C/XCR1/CCL1/LTA/CCL22/TNFRSF8/CD70/IL9R/TNF/CXCL3/PRL/IL2RA/IL12B/CD27/CCL11/FASLG/CSF3R/LIF/CXCL14/IL20RA/CCL26/CSF2/IL1A/OSM/CCR4/CXCR3/CXCL6/CCR5/IL10/IFNL1/IL19/CCR7/IL12A/CXCL13/CCR6/TNFSF15/TNFRSF18/TNFSF18/CXCR6/IL…	LIHC
KEGG_NATURAL_KILLER_CELL_MEDIATED_CYTOTOXICITY	KEGG_NATURAL_KILLER_CELL_MEDIATED_CYTOTOXICITY	131	0.580325	1.33999	0.00990099	0.160526	0.154201	3203	tags=35%, list=16%, signal=30%	IFNA17/IFNA13/IFNA16/RAET1L/IFNA21/IFNA6/PRKCG/IFNB1/IFNG/KLRC3/NCR2/IFNA1/IFNA14/PPP3R2/KLRC2/KLRK1/KIR2DL4/TNF/FASLG/KLRC1/KIR3DL2/PIK3CG/SH2D1A/CSF2/FCGR3B/ZAP70/PRKCB/KIR2DL3/LAT/LCK/CD244/PIK3R5/GZMB/VAV1/PIK3CD/KIR3DL1/ULBP3/CD48/SYK/KLRD1/CD247/KIR2DL1/LCP2/NCR3/NCR1/RAC2	LIHC
KEGG_JAK_STAT_SIGNALING_PATHWAY	KEGG_JAK_STAT_SIGNALING_PATHWAY	155	0.577242	1.33792	0.00990099	0.160526	0.154201	2382	tags=30%, list=12%, signal=26%	IFNA17/IFNA13/IFNA16/IFNE/IL21/IL22RA2/IFNL2/IFNA21/IFNA6/IFNB1/IFNG/IL11/IFNA1/IL21R/IL9/IFNA14/IFNW1/IL22/IL2/IFNL3/IL4/CSH1/IL9R/PRL/IL2RA/IL12B/CSF3R/LIF/PIK3CG/IL20RA/CSF2/OSM/IL10/IFNL1/JAK3/IL19/IL12A/IL12RB1/IL6/CSF2RB/IL26/IL13/IL7R/PIK3R5/IL24/PIK3CD	LIHC
KEGG_LONG_TERM_DEPRESSION	KEGG_LONG_TERM_DEPRESSION	68	0.599446	1.32602	0.0103093	0.160526	0.154201	3041	tags=29%, list=15%, signal=25%	CRHR1/CRH/PRKCG/PLA2G2D/PLA2G2E/PRKG2/GRID2/ITPR3/GRIA2/GRM5/PLA2G4E/PRKCB/RYR1/PLA2G10/PLA2G4A/PPP1R17/IGF1R/GRIA1/PLCB2/GRM1	LIHC
KEGG_NEUROACTIVE_LIGAND_RECEPTOR_INTERACTION	KEGG_NEUROACTIVE_LIGAND_RECEPTOR_INTERACTION	271	0.54957	1.30292	0.00990099	0.160526	0.154201	4496	tags=48%, list=23%, signal=38%	TAAR9/CRHR1/GABRA4/MC2R/TAAR8/GABRA5/TAAR6/MC5R/NMUR2/NPY4R/GRIA4/BRS3/SSTR3/HCRTR2/MC3R/TACR3/GABRP/NPFFR1/TSHB/AVPR1B/GABRA6/MCHR2/HTR1F/GRID2/CHRNA7/CHRNA1/FPR2/CHRNA6/GLRA2/CSH1/FSHB/GRIA2/P2RY10/TAAR5/MC4R/PRL/DRD2/GRM6/GABRR1/GRIN3B/MAS1/GABRB1/SCTR/HTR5A/GRIN2A/CHRNA9/CNR2/CALCR/FPR1/TAAR2/TSHR/P2RX5/GRM5/OPRM1/UTS2R/GIPR/DRD3/MTNR1B/GLP2R/OXTR/GLP1R/HTR6/GABRG3/PTAFR/GLRA3/CHRNA5/GABBR1/P…	LIHC
KEGG_CHEMOKINE_SIGNALING_PATHWAY	KEGG_CHEMOKINE_SIGNALING_PATHWAY	187	0.558642	1.29751	0.00990099	0.160526	0.154201	4817	tags=40%, list=25%, signal=31%	CCL7/CXCR5/CCR8/CXCL5/GNG8/XCR1/CCL1/CCL22/CXCL3/CCL11/NCF1/ITK/CXCL14/GNB3/PIK3CG/CCL26/CCR4/CXCR3/CXCL6/CCR5/GNG13/JAK3/CCR7/CXCL13/CCR6/DOCK2/CXCR6/PRKCB/CCR2/CXCR2/CXCL1/CCL19/CXCR1/PIK3R5/ADCY7/VAV1/PIK3CD/CXCL8/PLCB2/GNGT2/CCR10/FGR/XCL1/CCR9/CCL18/CCL13/RAC2/GNB4/HCK/PRKX/CXCL9/CCL4/VAV3/CCL4L2/XCL2/CCL21/CCR1/ADCY5/PF4V1/CXCL11/GNG2/GNGT1/PF4/CX3CR1/GRK7/CCL8/CCL20/CCL5/CCL2/WAS/TIAM2/CCL…	LIHC
KEGG_OLFACTORY_TRANSDUCTION	KEGG_OLFACTORY_TRANSDUCTION	359	0.542041	1.29227	0.00990099	0.160526	0.154201	1728	tags=35%, list=9%, signal=33%	OR5M10/OR6C76/OR2AK2/OR8K1/OR13C8/OR6C74/OR4A5/OR2T29/OR7D4/OR8H1/OR13C4/OR4F5/OR1A2/OR1L1/OR6X1/OR4M2/OR9K2/OR5P2/OR11H1/OR8H3/OR4P4/OR5AU1/OR52A1/OR10Z1/OR4F3/OR1D2/OR5D16/OR9G4/OR4C6/OR5T3/OR2T27/OR1D5/OR51V1/OR5J2/OR4C46/OR6B3/OR2A5/OR4E2/OR51D1/OR11A1/OR12D3/OR2H2/OR6K3/OR6S1/OR4K1/OR56A4/OR3A2/OR2J3/OR2T10/OR10H1/OR2B3/OR5T2/OR5V1/CLCA1/OR10G3/OR13C2/OR51I2/OR51B4/OR52E2/OR14J1/OR1L3/OR2M4/…	LIHC
KEGG_CELL_ADHESION_MOLECULES_CAMS	KEGG_CELL_ADHESION_MOLECULES_CAMS	131	0.553115	1.27716	0.00990099	0.160526	0.154201	4168	tags=37%, list=21%, signal=29%	NLGN1/CDH3/ITGB8/L1CAM/ICOS/NRXN1/CADM3/CTLA4/PDCD1/CLDN6/CD8B/CD80/CLDN17/ICAM3/CLDN18/CD22/CD6/SPN/CD8A/VCAN/ITGA4/NEGR1/PTPRC/HLA-DOB/CD226/CLDN11/CD2/CLDN4/CD86/CD40LG/PDCD1LG2/CLDN10/NLGN3/HLA-DOA/ITGAM/CNTNAP1/CD28/SELL/NCAM2/SELPLG/CD274/HLA-DQA2/SIGLEC1/HLA-DQA1/ITGB2/NCAM1/ITGA8/HLA-DMB	LIHC
KEGG_TYPE_I_DIABETES_MELLITUS	KEGG_TYPE_I_DIABETES_MELLITUS	41	0.650666	1.37315	0.0210526	0.296356	0.284679	4168	tags=51%, list=21%, signal=40%	IFNG/IL2/LTA/TNF/CD80/GAD1/IL12B/FASLG/IL1A/PTPRN/IL12A/IL1B/GZMB/HLA-DOB/CD86/HLA-DOA/CD28/HLA-DQA2/HLA-DQA1/PRF1/HLA-DMB	LIHC
KEGG_ALLOGRAFT_REJECTION	KEGG_ALLOGRAFT_REJECTION	35	0.651048	1.38459	0.03125	0.408482	0.392387	4168	tags=54%, list=21%, signal=43%	IFNG/IL2/IL4/TNF/CD80/IL12B/FASLG/IL10/IL12A/GZMB/HLA-DOB/CD86/CD40LG/HLA-DOA/CD28/HLA-DQA2/HLA-DQA1/PRF1/HLA-DMB	LIHC
KEGG_REGULATION_OF_AUTOPHAGY	KEGG_REGULATION_OF_AUTOPHAGY	35	0.644161	1.36994	0.0416667	0.481579	0.462604	949	tags=26%, list=5%, signal=25%	IFNA17/IFNA13/IFNA16/IFNA21/IFNA6/IFNG/IFNA1/IFNA14/BECN2	LIHC
KEGG_PROTEASOME	KEGG_PROTEASOME	44	0.634261	1.33945	0.0425532	0.481579	0.462604	458	tags=5%, list=2%, signal=4%	PSMA8/IFNG	LIHC
KEGG_CYTOKINE_CYTOKINE_RECEPTOR_INTERACTION	KEGG_CYTOKINE_CYTOKINE_RECEPTOR_INTERACTION	263	0.603414	1.83143	0.0294118	0.673993	0.659341	3800	tags=56%, list=19%, signal=46%	IFNA17/IFNA16/IFNA6/CCL1/CCL7/IL9/IL22RA2/IFNK/TNFSF4/GDF5/CCL26/IL13/CCL27/CD70/IFNA14/TNFSF18/TNFRSF9/CXCL6/IL21/CRLF2/CCR8/CCL11/CXCL14/TNFRSF11B/IL11/PPBP/CSF2/CCL24/IL2/INHBA/IL21R/CCL25/CCR4/IL2RA/CCR6/CCL17/TNF/IL1A/IFNW1/IFNG/IL9R/CCL8/TNFRSF8/CCR9/GH1/TNFRSF17/CXCL11/IFNL1/LTA/IL26/IL1B/CCL20/CXCR5/IL17A/OSM/IFNA10/CCL13/TGFB3/IL10/CXCL8/TNFSF8/PRLR/CCR2/IL23A/TNFRSF18/FLT3/IFNL3/IL12RB1…	LUAD
KEGG_PRIMARY_IMMUNODEFICIENCY	KEGG_PRIMARY_IMMUNODEFICIENCY	35	0.734589	1.76913	0.0192308	0.673993	0.659341	3563	tags=69%, list=18%, signal=56%	IGLL1/ICOS/RAG2/AIRE/CD19/AICDA/BTK/CD79A/IL7R/CD3D/TNFRSF13B/LCK/CD8B/PTPRC/TNFRSF13C/ADA/CD40/ZAP70/CD8A/CD40LG/CD3E/JAK3/CD4/IL2RG	LUAD
KEGG_CHEMOKINE_SIGNALING_PATHWAY	KEGG_CHEMOKINE_SIGNALING_PATHWAY	187	0.583574	1.73436	0.0277778	0.673993	0.659341	3800	tags=42%, list=19%, signal=34%	CCL1/CCL7/CCL26/CCL27/CXCL6/CCR8/CCL11/CXCL14/PPBP/CCL24/CCL25/CCR4/GNG8/CCR6/CCL17/CCL8/CCR9/CXCL11/CCL20/CXCR5/CCL13/CXCL8/CCR2/PIK3CG/SHC4/ITK/NCF1/CCL22/GNB3/CXCL10/CCR7/CXCR6/CCL4L2/CXCR3/CCR5/PF4V1/CCL3L3/CCL4/CCL3/CXCL9/ADCY5/DOCK2/HCK/CCR1/GNG2/VAV3/CCL2/CXCL13/CXCL12/TIAM2/CCL23/RAP1B/CXCL1/CX3CL1/GNGT2/PRKCB/GRK1/CCL19/WAS/CXCL5/TIAM1/PIK3R5/JAK3/XCL2/VAV1/RAC2/FGR/PIK3CD/JAK2/AKT3/CCL2…	LUAD
KEGG_INTESTINAL_IMMUNE_NETWORK_FOR_IGA_PRODUCTION	KEGG_INTESTINAL_IMMUNE_NETWORK_FOR_IGA_PRODUCTION	46	0.700026	1.67375	0.0212766	0.673993	0.659341	3923	tags=65%, list=20%, signal=52%	CCL27/CD80/IL2/ICOS/CCL25/CD28/CCR9/TNFRSF17/IL10/ITGB7/AICDA/CD86/ITGA4/IL15/TNFSF13B/TNFRSF13B/CXCL12/TNFRSF13C/ICOSLG/CD40/HLA-DOB/CD40LG/IL6/IL15RA/HLA-DQA1/HLA-DQA2/HLA-DMB/TGFB1/CXCR4/HLA-DOA	LUAD
KEGG_FOLATE_BIOSYNTHESIS	KEGG_FOLATE_BIOSYNTHESIS	10	-0.852443	-1.66495	0.0363636	0.673993	0.659341	786	tags=30%, list=4%, signal=29%	ALPL/ALPP/ALPI	LUAD
KEGG_HEMATOPOIETIC_CELL_LINEAGE	KEGG_HEMATOPOIETIC_CELL_LINEAGE	85	0.586705	1.55306	0.0212766	0.673993	0.659341	4195	tags=60%, list=21%, signal=47%	GYPA/DNTT/ITGB3/IL11/CSF2/CD1B/IL2RA/CD1A/TNF/IL1A/IL9R/IL1B/CD3G/FCER2/CD33/FCGR1A/FLT3/CD1E/CD19/CD1C/ITGAM/IL7/ITGA2/ITGA4/IL7R/CD3D/CR1/CSF2RA/MS4A1/CD8B/CD1D/IL1R2/CD5/FLT3LG/CD7/CD2/CSF1R/CSF1/CD8A/CD3E/IL6/CD37/ITGA5/CD4/MME/CD14/CD44/IL1R1/ITGA2B/ITGA1/IL3RA	LUAD
KEGG_LEISHMANIA_INFECTION	KEGG_LEISHMANIA_INFECTION	69	0.61458	1.49181	0.025	0.673993	0.659341	5674	tags=64%, list=29%, signal=45%	TNF/IL1A/IFNG/IL1B/TGFB3/IL10/FCGR1A/PTGS2/NCF1/ITGAM/ITGA4/TLR4/CR1/FCGR2A/NCF4/FCGR3A/PRKCB/HLA-DOB/NCF2/ITGB2/HLA-DQA1/HLA-DQA2/HLA-DMB/TGFB2/JAK2/TGFB1/FCGR3B/HLA-DOA/MAPK12/HLA-DQB1/HLA-DPA1/MAPK11/STAT1/HLA-DRA/MARCKSL1/IRAK4/HLA-DPB1/IFNGR2/TLR2/HLA-DRB5/IFNGR1/MYD88/IL4/HLA-DRB1	LUAD
KEGG_MELANOMA	KEGG_MELANOMA	71	0.582447	1.46191	0.0238095	0.673993	0.659341	3772	tags=34%, list=19%, signal=27%	FGF3/FGF16/FGF23/FGF20/FGF6/FGF1/FGF8/IGF1/FGF19/FGF7/PIK3CG/PDGFRA/PDGFC/FGF18/PDGFD/FGF2/FGFR1/FGF11/MITF/PIK3R5/PIK3CD/CDK6/AKT3/PDGFRB	LUAD
KEGG_RIG_I_LIKE_RECEPTOR_SIGNALING_PATHWAY	KEGG_RIG_I_LIKE_RECEPTOR_SIGNALING_PATHWAY	70	0.565606	1.41358	0.047619	0.673993	0.659341	1414	tags=13%, list=7%, signal=12%	IFNA17/IFNA16/IFNA6/IFNK/IFNA14/TNF/IFNW1/IFNA10/CXCL8	LUAD
KEGG_NATURAL_KILLER_CELL_MEDIATED_CYTOTOXICITY	KEGG_NATURAL_KILLER_CELL_MEDIATED_CYTOTOXICITY	131	0.503939	1.40694	0.047619	0.673993	0.659341	4297	tags=44%, list=22%, signal=34%	IFNA17/IFNA16/IFNA6/RAET1L/IFNA14/PRKCG/CSF2/TNF/IFNG/SH2D1A/ULBP2/IFNA10/PIK3CG/NCR3/SHC4/KLRC1/GZMB/FAS/KLRD1/LCK/LCP2/ULBP3/FASLG/VAV3/CD247/CD48/HLA-G/ULBP1/KLRK1/MICB/FYN/FCGR3A/ZAP70/HCST/PRKCB/ITGB2/PIK3R5/CD244/LAT/FCER1G/IFNAR2/VAV1/RAC2/KLRC3/PIK3CD/PRF1/TNFSF10/NCR1/TYROBP/FCGR3B/NFATC2/ITGAL/ICAM1/KIR2DL4/SHC2/BID/PLCG2	LUAD
KEGG_TOLL_LIKE_RECEPTOR_SIGNALING_PATHWAY	KEGG_TOLL_LIKE_RECEPTOR_SIGNALING_PATHWAY	102	0.506739	1.38679	0.0444444	0.673993	0.659341	2209	tags=21%, list=11%, signal=18%	IFNA17/IFNA16/IFNA6/IFNA14/CD80/TNF/CXCL11/TICAM2/IL1B/IFNA10/CXCL8/PIK3CG/CTSK/TLR8/SPP1/CD86/CXCL10/CCL4/CCL3/TLR4/CXCL9	LUAD
KEGG_NEUROACTIVE_LIGAND_RECEPTOR_INTERACTION	KEGG_NEUROACTIVE_LIGAND_RECEPTOR_INTERACTION	271	-0.490884	-1.37708	0.0422535	0.673993	0.659341	1973	tags=27%, list=10%, signal=24%	CNR1/THRB/SSTR4/HTR2C/DRD2/GRIK1/VIPR1/TAAR6/ADRA1D/HTR5A/ADRB1/GLRA1/NMUR1/CHRNB2/CCKBR/NPFFR2/NPY2R/CHRNA5/GRIK3/TRPV1/SSTR1/CHRNA7/PRLHR/ADCYAP1R1/NPY5R/LEP/GABRB3/RXFP1/LHCGR/BRS3/CHRNA3/MTNR1B/GABRG3/GRM4/GALR3/GH2/VIPR2/AGTR2/F2/OPRM1/PLG/MCHR2/CHRNA4/CHRNA2/NPBWR2/CHRM3/GRID2/GABRG1/GRIN2B/GRIA1/CHRM2/CHRM1/GABRR1/GALR1/ADRA1A/GRM7/HRH3/GABRG2/CCKAR/CGA/TRHR/TACR3/TAAR1/GABRA1/NTSR2/GLRA2/…	LUAD
KEGG_PATHWAYS_IN_CANCER	KEGG_PATHWAYS_IN_CANCER	325	0.429701	1.30819	0.0322581	0.673993	0.659341	4326	tags=28%, list=22%, signal=22%	FGF3/FGF16/WNT8A/FGF23/FGF20/FGF6/WNT16/WNT7A/GLI1/FGF1/PRKCG/MMP1/FGF8/WNT2/WNT10A/IGF1/LEF1/FGF19/FGF7/BMP4/EGLN3/TGFB3/MMP9/CXCL8/KLK3/PIK3CG/NTRK1/FLT3/PTGS2/PDGFRA/TGFA/FZD2/ITGA2/PGF/GLI3/WNT5A/FAS/WNT5B/RUNX1T1/CSF2RA/FASLG/FGF18/FZD1/FLT3LG/MMP2/RARB/FGF2/CSF1R/LAMA4/ITGAV/FN1/GLI2/WNT10B/CCNE1/PRKCB/FZD7/FGFR1/FGF11/LAMC2/IL6/MITF/PIK3R5/SMO/SPI1/VEGFC/CCNE2/TRAF1/SLC2A1/BIRC5/RAC2/RAD51…	LUAD
KEGG_OLFACTORY_TRANSDUCTION	KEGG_OLFACTORY_TRANSDUCTION	359	0.839719	2.23564	0.0102041	0.238961	0.214627	1000	tags=54%, list=5%, signal=52%	OR2G3/OR8K1/OR4K13/OR10Z1/OR8J1/OR5F1/OR5L2/OR5AS1/OR4C13/OR8J3/OR2T27/OR51A2/OR6C6/OR52A1/OR6K2/OR4K5/OR4B1/OR5AC2/OR4S1/OR2M5/OR4K15/OR8B8/OR2M7/OR7G1/OR10R2/OR8H3/OR5A1/OR4M2/OR10K2/OR4C46/OR12D3/OR4K2/OR51D1/OR2M2/OR11L1/OR4C15/OR2Z1/OR6Y1/OR51V1/OR5A2/OR10A7/OR4D11/OR51A4/OR8I2/OR1S2/OR5D16/OR10G8/OR51L1/OR11G2/OR4F3/OR9Q2/OR5M9/OR10G3/OR8U1/OR2F2/OR1D2/OR5I1/OR8H1/OR4L1/OR5B3/OR9G1/OR4K14/O…	LUSC
KEGG_CYTOSOLIC_DNA_SENSING_PATHWAY	KEGG_CYTOSOLIC_DNA_SENSING_PATHWAY	54	0.819019	1.84484	0.0125	0.238961	0.214627	934	tags=20%, list=5%, signal=19%	IFNA16/IFNA6/IFNA14/IFNA17/IFNA13/IFNA4/IFNA10/IFNA7/IFNA21/IFNA1/IFNA8	LUSC
KEGG_RIG_I_LIKE_RECEPTOR_SIGNALING_PATHWAY	KEGG_RIG_I_LIKE_RECEPTOR_SIGNALING_PATHWAY	70	0.786595	1.76989	0.0128205	0.238961	0.214627	1580	tags=20%, list=8%, signal=18%	IFNA16/IFNA6/IFNA14/IFNA17/IFNA13/IFNA4/IFNA10/IFNA7/IFNA21/IFNA1/IFNA8/TNF/IFNW1/IFNE	LUSC
KEGG_REGULATION_OF_AUTOPHAGY	KEGG_REGULATION_OF_AUTOPHAGY	35	0.872108	1.76433	0.0142857	0.238961	0.214627	934	tags=31%, list=5%, signal=30%	IFNA16/IFNA6/IFNA14/IFNA17/IFNA13/IFNA4/IFNA10/IFNA7/IFNA21/IFNA1/IFNA8	LUSC
KEGG_ANTIGEN_PROCESSING_AND_PRESENTATION	KEGG_ANTIGEN_PROCESSING_AND_PRESENTATION	80	0.745792	1.73598	0.0119048	0.238961	0.214627	1098	tags=16%, list=6%, signal=15%	IFNA16/IFNA6/IFNA14/IFNA17/IFNA13/IFNA4/IFNA10/IFNA7/KIR3DL3/IFNA21/IFNA1/IFNA8/KIR2DL3	LUSC
KEGG_TOLL_LIKE_RECEPTOR_SIGNALING_PATHWAY	KEGG_TOLL_LIKE_RECEPTOR_SIGNALING_PATHWAY	102	0.710724	1.72281	0.0116279	0.238961	0.214627	2019	tags=21%, list=10%, signal=19%	IFNA16/IFNA6/IFNA14/IFNA17/IFNA13/IFNA4/IFNA10/IFNA7/IFNA21/IFNA1/IFNA8/TNF/TICAM2/TLR7/CD80/CXCL11/CTSK/PIK3CG/TLR8/TLR4/IL1B	LUSC
KEGG_NATURAL_KILLER_CELL_MEDIATED_CYTOTOXICITY	KEGG_NATURAL_KILLER_CELL_MEDIATED_CYTOTOXICITY	131	0.688786	1.71251	0.0114943	0.238961	0.214627	4178	tags=48%, list=21%, signal=38%	IFNA16/IFNA6/IFNA14/IFNA17/IFNA13/IFNA4/IFNA10/IFNA7/CSF2/IFNA21/IFNA1/IFNA8/KIR2DL3/TNF/FCGR3B/TNFRSF10D/PIK3CG/KIR2DL1/ULBP2/SHC4/KIR3DL1/RAET1L/RAET1G/PIK3R5/CD244/IFNA2/LCP2/SH2D1B/CD48/FCGR3A/HCST/ITGB2/ULBP3/SH2D1A/NFATC2/KIR3DL2/ICAM1/HLA-G/ITGAL/TYROBP/RAC2/FCER1G/IFNB1/PRKCB/ICAM2/NCR2/CD247/LCK/KLRD1/FASLG/SHC3/TNFRSF10C/NCR3/FAS/PRKCA/PRF1/KLRC1/GZMB/IFNAR2/PPP3R2/NCR1/NFATC4/PIK3CD	LUSC
KEGG_CYTOKINE_CYTOKINE_RECEPTOR_INTERACTION	KEGG_CYTOKINE_CYTOKINE_RECEPTOR_INTERACTION	263	0.648082	1.71174	0.0105263	0.238961	0.214627	3866	tags=56%, list=20%, signal=45%	IFNA16/IFNA6/IFNA14/IFNA17/IFNA13/IFNA4/IFNA10/IFNA7/IL3/GH2/IL22/IL11/CSF2/PPBP/INHBA/IFNA21/TNFSF4/IFNA1/IFNA8/CCL7/TNFRSF17/CCL11/IL26/CXCR1/IL5RA/CCR8/TNFSF11/TNF/CCL13/CCR4/PF4V1/TGFB3/CCR2/EDA2R/CCL3L3/IL22RA2/IFNW1/IL10/IL1A/CCL1/OSM/IL7R/PDGFRA/IFNE/XCR1/IL12RB2/TGFB2/HGF/TNFRSF10D/CXCL11/CXCL5/IL21/CCL23/TNFRSF9/IL9R/CXCL6/TNFRSF19/TNFSF14/CCL4L2/IL21R/PDGFC/CCL22/IL1B/TNFSF8/PDGFRB/CCR6…	LUSC
KEGG_JAK_STAT_SIGNALING_PATHWAY	KEGG_JAK_STAT_SIGNALING_PATHWAY	155	0.664747	1.68808	0.011236	0.238961	0.214627	3389	tags=36%, list=17%, signal=30%	IFNA16/CSH1/IFNA6/IFNA14/IFNA17/IFNA13/IFNA4/IFNA10/IFNA7/IL3/GH2/IL22/IL11/CSF2/IFNA21/IFNA1/IFNA8/IL26/IL5RA/IL22RA2/IFNW1/IL10/OSM/IL7R/IFNE/IL12RB2/IL21/PIK3CG/IL9R/IL21R/LIF/GH1/IL2RA/STAT4/IL10RA/PIK3R5/IFNA2/PRLR/CSF3R/IL12RB1/IL2/IL24/TSLP/IFNL1/CSF2RB/CSF2RA/CCND2/SOCS2/IL23R/IL2RB/AKT3/CSF3/IL6/CISH/IL2RG/IL7	LUSC
KEGG_AUTOIMMUNE_THYROID_DISEASE	KEGG_AUTOIMMUNE_THYROID_DISEASE	50	0.742408	1.65327	0.0133333	0.238961	0.214627	3126	tags=52%, list=16%, signal=44%	IFNA16/IFNA6/IFNA14/IFNA17/IFNA13/IFNA4/IFNA10/IFNA7/IFNA21/IFNA1/IFNA8/TSHB/CD80/IL10/CD28/TSHR/TG/CTLA4/IFNA2/IL2/CD86/HLA-DQA2/HLA-DMB/CD40LG/HLA-DQA1/HLA-DOA	LUSC
KEGG_HEMATOPOIETIC_CELL_LINEAGE	KEGG_HEMATOPOIETIC_CELL_LINEAGE	85	0.650416	1.53864	0.0116279	0.238961	0.214627	4525	tags=71%, list=23%, signal=55%	IL3/GYPA/IL11/CSF2/IL5RA/TNF/ITGB3/CD1B/CD1A/IL1A/CD1E/IL7R/ITGA1/FCGR1A/GP5/IL9R/CD1C/ITGA4/CD33/IL1B/CR1/ITGAM/IL2RA/ANPEP/CD19/ITGA5/CSF1R/CSF3R/FLT3/CSF2RA/IL1R1/MME/CD1D/CD5/CD4/MS4A1/CD2/CD14/CSF3/CD3G/IL6/CD38/CD37/CD3E/IL7/CD3D/CD7/CSF1/CD34/IL1R2/ITGA2/HLA-DRB5/IL4R/ITGA3/CD8A/HLA-DRB1/CD22/HLA-DRA/CD59/KITLG	LUSC
KEGG_METABOLISM_OF_XENOBIOTICS_BY_CYTOCHROME_P450	KEGG_METABOLISM_OF_XENOBIOTICS_BY_CYTOCHROME_P450	68	-0.654369	-2.10727	0.0434783	0.32	0.287414	2812	tags=49%, list=14%, signal=42%	CYP2C8/CYP3A5/UGT1A6/CYP3A7/CYP2C19/GSTM4/UGT1A8/AKR1C1/GSTM2/ADH1A/CYP2F1/GSTA1/UGT1A5/UGT1A10/UGT1A1/UGT1A3/UGT1A4/UGT2B15/ADH6/GSTA3/ADH1C/GSTA5/GSTA2/UGT2A1/UGT2B7/UGT2B4/UGT1A9/UGT2B28/ADH4/AKR1C4/UGT2A3/CYP2B6/UGT2B10	LUSC
KEGG_DRUG_METABOLISM_CYTOCHROME_P450	KEGG_DRUG_METABOLISM_CYTOCHROME_P450	70	-0.640781	-2.07822	0.0416667	0.32	0.287414	2812	tags=47%, list=14%, signal=41%	CYP2C8/CYP3A5/UGT1A6/CYP3A7/CYP2C19/GSTM4/UGT1A8/GSTM2/ADH1A/CYP2D6/GSTA1/UGT1A5/UGT1A10/UGT1A1/UGT1A3/CYP2A6/CYP2A13/UGT1A4/UGT2B15/ADH6/GSTA3/ADH1C/GSTA5/GSTA2/UGT2A1/UGT2B7/UGT2B4/UGT1A9/UGT2B28/ADH4/UGT2A3/CYP2B6/UGT2B10	LUSC
KEGG_PENTOSE_AND_GLUCURONATE_INTERCONVERSIONS	KEGG_PENTOSE_AND_GLUCURONATE_INTERCONVERSIONS	28	-0.786236	-2.06887	0.0322581	0.32	0.287414	1316	tags=50%, list=7%, signal=47%	XYLB/UGT1A5/UGT1A10/UGT1A1/UGT1A3/UGT1A4/UGT2B15/UGT2A1/UGT2B7/UGT2B4/UGT1A9/UGT2B28/UGT2A3/UGT2B10	LUSC
KEGG_PORPHYRIN_AND_CHLOROPHYLL_METABOLISM	KEGG_PORPHYRIN_AND_CHLOROPHYLL_METABOLISM	40	-0.753633	-2.04996	0.0357143	0.32	0.287414	1316	tags=35%, list=7%, signal=33%	UGT1A5/UGT1A10/UGT1A1/UGT1A3/UGT1A4/UGT2B15/FTMT/UGT2A1/UGT2B7/UGT2B4/UGT1A9/UGT2B28/UGT2A3/UGT2B10	LUSC
KEGG_ASCORBATE_AND_ALDARATE_METABOLISM	KEGG_ASCORBATE_AND_ALDARATE_METABOLISM	25	-0.809642	-2.02453	0.03125	0.32	0.287414	1487	tags=56%, list=8%, signal=52%	MIOX/UGT1A5/UGT1A10/UGT1A1/UGT1A3/UGT1A4/UGT2B15/UGT2A1/UGT2B7/UGT2B4/UGT1A9/UGT2B28/UGT2A3/UGT2B10	LUSC
KEGG_MATURITY_ONSET_DIABETES_OF_THE_YOUNG	KEGG_MATURITY_ONSET_DIABETES_OF_THE_YOUNG	25	-0.761738	-1.90474	0.03125	0.32	0.287414	1049	tags=44%, list=5%, signal=42%	PAX6/NKX2-2/MNX1/PDX1/NEUROG3/HNF4A/HNF1A/ONECUT1/SLC2A2/PAX4/NEUROD1	LUSC
KEGG_DRUG_METABOLISM_OTHER_ENZYMES	KEGG_DRUG_METABOLISM_OTHER_ENZYMES	51	-0.606664	-1.71401	0.0416667	0.32	0.287414	1316	tags=31%, list=7%, signal=29%	UGT1A5/UGT1A10/UGT1A1/UGT1A3/CYP2A6/UPB1/CYP2A13/UGT1A4/UGT2B15/UGT2A1/UGT2B7/UGT2B4/UGT1A9/UGT2B28/UGT2A3/UGT2B10	LUSC
KEGG_STARCH_AND_SUCROSE_METABOLISM	KEGG_STARCH_AND_SUCROSE_METABOLISM	50	-0.584638	-1.66294	0.037037	0.32	0.287414	1460	tags=32%, list=7%, signal=30%	AMY2B/UGT1A5/UGT1A10/UGT1A1/UGT1A3/UGT1A4/UGT2B15/UGT2A1/UGT2B7/UGT2B4/GYS2/UGT1A9/UGT2B28/UGT2A3/SI/UGT2B10	LUSC
KEGG_PPAR_SIGNALING_PATHWAY	KEGG_PPAR_SIGNALING_PATHWAY	69	-0.49935	-1.6381	0.0434783	0.32	0.287414	1494	tags=20%, list=8%, signal=19%	CPT1B/SLC27A2/AQP7/ACSL6/PLIN1/FABP1/CYP4A22/APOA1/APOA2/FABP2/APOA5/HMGCS2/APOC3/PCK1	LUSC
KEGG_FOLATE_BIOSYNTHESIS	KEGG_FOLATE_BIOSYNTHESIS	10	-0.76877	-1.63372	0.0425532	0.32	0.287414	34	tags=20%, list=0%, signal=20%	ALPP/ALPI	LUSC
KEGG_DORSO_VENTRAL_AXIS_FORMATION	KEGG_DORSO_VENTRAL_AXIS_FORMATION	24	-0.634254	-1.59144	0.0294118	0.32	0.287414	2615	tags=21%, list=13%, signal=18%	FMN2/PIWIL2/SPIRE2/PIWIL1/PIWIL3	LUSC
KEGG_HOMOLOGOUS_RECOMBINATION	KEGG_HOMOLOGOUS_RECOMBINATION	28	-0.584086	-1.53694	0.0322581	0.32	0.287414	7163	tags=79%, list=37%, signal=50%	RPA3/SSBP1/POLD1/RPA1/TOP3A/RAD50/SEM1/RAD51/TOP3B/MRE11/RPA4/POLD3/XRCC3/RAD51C/RAD54B/RAD52/RAD54L/RAD51D/BLM/XRCC2/BRCA2/EME1	LUSC
KEGG_GRAFT_VERSUS_HOST_DISEASE	KEGG_GRAFT_VERSUS_HOST_DISEASE	37	0.727759	1.51198	0.0410959	0.32	0.287414	4828	tags=89%, list=25%, signal=67%	KIR2DL3/TNF/CD80/IL1A/KIR2DL1/CD28/IL1B/KIR3DL1/IL2/CD86/HLA-DQA2/HLA-DMB/HLA-DQA1/HLA-DOA/IL6/KIR3DL2/HLA-G/HLA-DOB/HLA-DQB1/HLA-DPA1/KLRD1/FASLG/FAS/PRF1/KLRC1/GZMB/HLA-DPB1/HLA-DRB5/HLA-DMA/HLA-DRB1/HLA-DRA/IFNG/HLA-F	LUSC
KEGG_FOCAL_ADHESION	KEGG_FOCAL_ADHESION	199	0.52819	1.35727	0.0337079	0.32	0.287414	4849	tags=46%, list=25%, signal=35%	COL11A1/ITGA11/COMP/MYL7/MYL2/TNN/MYL10/COL5A3/ITGB3/THBS2/COL5A1/PDGFRA/IGF1/LAMA4/HGF/LAMA2/COL6A3/ITGA1/COL5A2/PIK3CG/MYLK/ITGA4/SHC4/PDGFC/IBSP/PDGFRB/ITGA9/PAK5/FLNC/TNC/FN1/COL1A2/ITGB6/COL1A1/PIK3R5/LAMA3/LAMC2/COL3A1/ITGA5/PGF/THBS1/MYL9/PDGFB/RASGRF1/COL6A2/ILK/COL6A1/ITGB7/PDGFA/MYLK3/ITGA8/CCND2/VEGFC/PARVG/CAV1/ACTN3/TLN2/AKT3/RAC2/LAMA1/COL6A6/PRKCB/ACTN1/FLT1/SHC3/CAV2/ITGA2/ITGAV/P…	LUSC
KEGG_RETINOL_METABOLISM	KEGG_RETINOL_METABOLISM	64	-0.594375	-1.90777	0.0454545	0.321678	0.288922	2862	tags=47%, list=15%, signal=40%	RDH5/CYP2C8/CYP3A5/ALDH1A1/UGT1A6/CYP3A7/CYP2C19/UGT1A8/ADH1A/UGT1A5/UGT1A10/BCO1/UGT1A1/UGT1A3/CYP2A6/CYP2A13/UGT1A4/UGT2B15/ADH6/ADH1C/CYP4A22/UGT2A1/UGT2B7/UGT2B4/UGT1A9/UGT2B28/ADH4/UGT2A3/CYP2B6/UGT2B10	LUSC
KEGG_TERPENOID_BACKBONE_BIOSYNTHESIS	KEGG_TERPENOID_BACKBONE_BIOSYNTHESIS	15	-0.666033	-1.4727	0.0487805	0.33243	0.298578	1588	tags=20%, list=8%, signal=18%	PDSS1/IDI2/HMGCS2	LUSC
KEGG_RIG_I_LIKE_RECEPTOR_SIGNALING_PATHWAY	KEGG_RIG_I_LIKE_RECEPTOR_SIGNALING_PATHWAY	70	-0.842975	-1.78832	0.0147059	0.365079	0.359231	835	tags=16%, list=4%, signal=15%	IFNA13/IFNA1/IFNA8/IFNA21/IFNA14/IFNW1/IFNA17/IFNA16/IFNA10/IFNA2/IFNA4	MESO
KEGG_REGULATION_OF_AUTOPHAGY	KEGG_REGULATION_OF_AUTOPHAGY	35	-0.924887	-1.7647	0.015625	0.365079	0.359231	835	tags=31%, list=4%, signal=30%	IFNA13/IFNA1/INS/IFNA8/IFNA21/IFNA14/IFNA17/IFNA16/IFNA10/IFNA2/IFNA4	MESO
KEGG_TOLL_LIKE_RECEPTOR_SIGNALING_PATHWAY	KEGG_TOLL_LIKE_RECEPTOR_SIGNALING_PATHWAY	102	-0.755995	-1.71153	0.0136986	0.365079	0.359231	835	tags=10%, list=4%, signal=9%	IFNA13/IFNA1/IFNA8/IFNA21/IFNA14/IFNA17/IFNA16/IFNA10/IFNA2/IFNA4	MESO
KEGG_ANTIGEN_PROCESSING_AND_PRESENTATION	KEGG_ANTIGEN_PROCESSING_AND_PRESENTATION	80	-0.780012	-1.69029	0.0142857	0.365079	0.359231	2118	tags=24%, list=11%, signal=21%	KIR3DL1/KLRC1/KLRC3/KIR2DL1/KLRD1/KIR2DL4/KIR3DL2/KLRC4/KIR3DL3/IFNA13/IFNA1/IFNA8/IFNA21/IFNA14/IFNA17/IFNA16/IFNA10/IFNA2/IFNA4	MESO
KEGG_CYTOSOLIC_DNA_SENSING_PATHWAY	KEGG_CYTOSOLIC_DNA_SENSING_PATHWAY	54	-0.852458	-1.68154	0.015873	0.365079	0.359231	835	tags=22%, list=4%, signal=21%	IFNB1/ZBP1/IFNA13/IFNA1/IFNA8/IFNA21/IFNA14/IFNA17/IFNA16/IFNA10/IFNA2/IFNA4	MESO
KEGG_AUTOIMMUNE_THYROID_DISEASE	KEGG_AUTOIMMUNE_THYROID_DISEASE	50	-0.814584	-1.61617	0.0151515	0.365079	0.359231	2034	tags=34%, list=10%, signal=31%	PRF1/GZMB/CD40LG/CGA/FASLG/IL5/IL4/IFNA13/IFNA1/IFNA8/IFNA21/IFNA14/IFNA17/IFNA16/IFNA10/IFNA2/IFNA4	MESO
KEGG_NATURAL_KILLER_CELL_MEDIATED_CYTOTOXICITY	KEGG_NATURAL_KILLER_CELL_MEDIATED_CYTOTOXICITY	131	-0.679994	-1.55961	0.0149254	0.365079	0.359231	3308	tags=31%, list=17%, signal=26%	HLA-G/PIK3R5/SH2D1A/TNFSF10/KLRC2/ICAM2/LAT/LCK/PRKCG/TNF/PLCG2/ITGAL/PIK3CG/SHC3/TNFRSF10C/CD247/ZAP70/PPP3R2/SH2D1B/KIR3DL1/KLRC1/PRF1/KLRK1/KLRC3/GZMB/KIR2DL1/KLRD1/KIR2DL4/FASLG/KIR3DL2/IFNB1/IFNA13/IFNA1/IFNA8/IFNA21/IFNA14/IFNA17/IFNA16/IFNA10/IFNA2/IFNA4	MESO
KEGG_JAK_STAT_SIGNALING_PATHWAY	KEGG_JAK_STAT_SIGNALING_PATHWAY	155	-0.650229	-1.54149	0.0138889	0.365079	0.359231	2588	tags=26%, list=13%, signal=23%	IL2RB/IL12B/LEPR/IL21/IL7R/IL3/IL12RB1/IL12A/IFNL2/STAT4/SPRY3/IL12RB2/CSF2RB/IL6R/IL20/IFNK/CBLC/IL19/GH1/CRLF2/IL5/IFNB1/CSF3/LEP/IL4/TSLP/PRLR/IFNA13/IL13/IFNA1/IFNA8/IFNA21/IFNA14/IL23R/CSH1/IFNW1/IFNA17/IFNA16/IFNA10/IFNA2/IFNA4	MESO
KEGG_TERPENOID_BACKBONE_BIOSYNTHESIS	KEGG_TERPENOID_BACKBONE_BIOSYNTHESIS	15	-0.894957	-1.60103	0.030303	0.619529	0.609605	300	tags=20%, list=2%, signal=20%	ACAT2/HMGCS2/IDI2	MESO
KEGG_OLFACTORY_TRANSDUCTION	KEGG_OLFACTORY_TRANSDUCTION	359	-0.505457	-1.28993	0.0361446	0.66506	0.654407	1026	tags=25%, list=5%, signal=24%	OR1L4/OR7A17/OR52N2/OR2C3/OR51G2/OR10H5/OR2A2/OR4F6/OR9A2/OR7E24/OR7C1/OR2M3/OR6B2/OR52E4/OR2A14/OR52E2/OR51B4/OR4C6/OR2A25/OR5AK2/OR2H1/OR2S2/OR2B2/OR14C36/OR52B6/OR6K2/CNGA3/OR2T4/OR7C2/OR6K6/OR1C1/OR1L3/OR10J3/OR1N1/OR2Z1/OR10H1/OR1L1/OR13C4/OR5M1/OR4A47/OR1N2/OR6Q1/OR8B4/OR5T1/OR6C75/OR1D5/OR6C74/OR4M1/OR2A4/OR6V1/OR2AG1/OR4K14/OR5B17/OR7D4/OR2T1/OR52N5/OR4D6/OR6N2/OR4D11/OR4C3/OR4F5/OR12D3/O…	MESO
KEGG_CYTOKINE_CYTOKINE_RECEPTOR_INTERACTION	KEGG_CYTOKINE_CYTOKINE_RECEPTOR_INTERACTION	263	-0.544177	-1.33841	0.04	0.669091	0.658373	2825	tags=32%, list=14%, signal=27%	CXCL9/PPBP/TNFRSF10C/FLT3LG/CXCL3/CD27/CCR4/CCL22/CXCR3/IL2RB/CXCL10/IL12B/CXCR2/FLT4/CCL14/LEPR/IL21/IL7R/IL3/CCL20/IL12RB1/IL12A/IFNL2/CCR7/KIT/CCR2/CCL8/TNFRSF13C/CCR8/IL12RB2/CSF2RB/IL6R/PF4/CX3CL1/CCR3/IL20/CCL23/CCL17/IL17B/CD40LG/IL1R2/IFNK/IL18RAP/CCL7/IL19/FASLG/CXCR6/GH1/TNFSF15/CRLF2/CXCL1/IL5/IFNB1/CXCL5/CXCL6/CXCL11/CSF3/LEP/IL4/VEGFD/PF4V1/CCR9/XCR1/TSLP/PRLR/TNFRSF17/IFNA13/IL13/TN…	MESO
KEGG_COMPLEMENT_AND_COAGULATION_CASCADES	KEGG_COMPLEMENT_AND_COAGULATION_CASCADES	69	-0.660645	-1.39969	0.0441176	0.676471	0.665635	2192	tags=26%, list=11%, signal=23%	F2/CR2/MBL2/FGG/CR1/F10/C6/KNG1/F13B/F11/MASP1/FGA/PLG/C8A/CPB2/C8B/FGB/F9	MESO
KEGG_LEISHMANIA_INFECTION	KEGG_LEISHMANIA_INFECTION	69	0.711694	2.10578	0.0357143	0.249322	0.212523	4043	tags=65%, list=21%, signal=52%	IFNG/FCGR3B/IL10/ITGA4/IL12B/TLR4/ITGAM/FCGR1A/FCGR2A/TGFB3/NCF1/NCF2/PRKCB/TLR2/IL1B/PTGS2/FCGR3A/ITGB2/NCF4/TNF/HLA-DQA1/IL1A/MAPK11/HLA-DQA2/TGFB1/HLA-DQB1/HLA-DRB5/CR1/HLA-DPA1/HLA-DPB1/MAPK12/JAK2/HLA-DOA/IL12A/C3/ITGB1/IFNGR1/HLA-DRA/HLA-DRB1/FOS/HLA-DMA/HLA-DMB/NFKB1/MAPK1/IRAK4	OV
KEGG_NOD_LIKE_RECEPTOR_SIGNALING_PATHWAY	KEGG_NOD_LIKE_RECEPTOR_SIGNALING_PATHWAY	62	0.706727	2.00085	0.0344828	0.249322	0.212523	4037	tags=55%, list=21%, signal=44%	CCL11/IL6/CCL13/CASP5/CCL7/NLRP3/CCL8/IL1B/MEFV/CCL5/TNF/NLRC4/PSTPIP1/CXCL1/CXCL8/NAIP/CCL2/MAPK11/CXCL2/TNFAIP3/CASP1/NOD2/CARD6/MAPK12/PYCARD/IL18/CARD9/BIRC3/MAPK9/RIPK2/CARD8/NFKB1/MAPK1/IKBKG	OV
KEGG_GRAFT_VERSUS_HOST_DISEASE	KEGG_GRAFT_VERSUS_HOST_DISEASE	37	0.789971	1.93834	0.027027	0.249322	0.212523	2988	tags=73%, list=15%, signal=62%	KIR2DL3/KIR2DL1/CD80/IL6/IFNG/KIR3DL2/KIR3DL1/CD28/FASLG/CD86/PRF1/GZMB/KLRC1/IL2/KLRD1/IL1B/TNF/HLA-DQA1/IL1A/HLA-DQA2/HLA-DQB1/FAS/HLA-DRB5/HLA-DPA1/HLA-DPB1/HLA-F/HLA-DOA	OV
KEGG_HEMATOPOIETIC_CELL_LINEAGE	KEGG_HEMATOPOIETIC_CELL_LINEAGE	85	0.650314	1.93143	0.0434783	0.249322	0.212523	2859	tags=64%, list=15%, signal=55%	IL7R/CD1A/CD1B/MS4A1/CD1E/CD36/IL9R/FCER2/CD1C/IL6/IL2RA/CSF2/CD3G/CD3D/ITGA4/CD2/CD3E/CD5/CD33/ITGAM/FCGR1A/CD8A/CSF2RA/ITGB3/ITGA5/THPO/CSF3R/MME/IL1B/CD37/IL3/ITGA1/CD7/TNF/CSF1R/IL4R/IL1A/IL7/CD8B/CD38/ANPEP/DNTT/IL11/FLT3LG/CD44/CD14/CD1D/CD4/HLA-DRB5/CR1/CD34/TFRC/ITGA2/KIT	OV
KEGG_T_CELL_RECEPTOR_SIGNALING_PATHWAY	KEGG_T_CELL_RECEPTOR_SIGNALING_PATHWAY	108	0.633087	1.89063	0.04	0.249322	0.212523	2381	tags=29%, list=12%, signal=25%	ITK/ICOS/CTLA4/IFNG/CSF2/IL10/GRAP2/CD3G/CD3D/CD40LG/PIK3CG/PTPRC/CD3E/CD28/CD247/PIK3R5/ZAP70/CD8A/LCP2/IL2/AKT3/LCK/PDCD1/TNF/MAPK11/CD8B/VAV1/PIK3CD/NFATC1/CD4/PPP3CC	OV
KEGG_PORPHYRIN_AND_CHLOROPHYLL_METABOLISM	KEGG_PORPHYRIN_AND_CHLOROPHYLL_METABOLISM	40	-0.792323	-1.80062	0.0151515	0.249322	0.212523	1203	tags=28%, list=6%, signal=26%	UGT1A6/UGT2B11/FTMT/UGT1A8/UGT1A10/UGT2B28/UGT1A7/UGT1A9/UGT1A1/UGT2A3/UGT1A5	OV
KEGG_PRIMARY_IMMUNODEFICIENCY	KEGG_PRIMARY_IMMUNODEFICIENCY	35	0.745995	1.7959	0.027027	0.249322	0.212523	1457	tags=46%, list=7%, signal=42%	IL7R/TNFRSF13B/ICOS/IGLL1/CD79A/CD3D/CD40LG/PTPRC/BTK/CD3E/ZAP70/CD8A/RAG2/AICDA/IL2RG/LCK	OV
KEGG_ECM_RECEPTOR_INTERACTION	KEGG_ECM_RECEPTOR_INTERACTION	84	0.596486	1.78835	0.0416667	0.249322	0.212523	2582	tags=43%, list=13%, signal=37%	COL11A1/TNN/COL6A6/ITGA11/THBS2/COMP/COL5A3/CD36/COL5A2/COL5A1/IBSP/ITGA4/FN1/COL6A3/TNC/LAMA4/ITGB3/ITGA5/THBS1/ITGA8/COL3A1/ITGB6/ITGA1/COL1A1/COL1A2/SV2B/SDC1/COL6A2/COL6A1/VTN/LAMB1/CD44/COL4A1/SPP1/ITGB7/ITGA9	OV
KEGG_TYPE_I_DIABETES_MELLITUS	KEGG_TYPE_I_DIABETES_MELLITUS	41	0.697269	1.76503	0.027027	0.249322	0.212523	3018	tags=59%, list=15%, signal=50%	CD80/IFNG/PTPRN/IL12B/CD28/FASLG/LTA/CD86/PRF1/GZMB/IL2/IL1B/TNF/HLA-DQA1/IL1A/HLA-DQA2/HLA-DQB1/FAS/HLA-DRB5/HLA-DPA1/HLA-DPB1/HLA-F/HLA-DOA/IL12A	OV
KEGG_CELL_ADHESION_MOLECULES_CAMS	KEGG_CELL_ADHESION_MOLECULES_CAMS	131	0.566846	1.73318	0.037037	0.249322	0.212523	3468	tags=56%, list=18%, signal=46%	NCAM2/SELE/VCAN/VCAM1/ICOS/CTLA4/NEGR1/PDCD1LG2/CD80/ICAM3/SELP/CD40LG/ITGA4/CD2/PTPRC/CNTN1/CD28/SPN/ITGAM/CD8A/CD86/CADM3/ITGAL/ITGA8/SELL/CD226/PDCD1/JAM2/ITGB2/SIGLEC1/CLDN11/SELPLG/HLA-DQA1/CLDN14/PECAM1/JAM3/SDC1/ICAM1/CD8B/CD274/HLA-DQA2/HLA-DQB1/CD6/CDH5/CLDN16/CD4/NFASC/CLDN17/CLDN5/CDH15/ITGB7/ITGA9/HLA-DRB5/HLA-DPA1/CD34/ESAM/MADCAM1/HLA-DPB1/CNTNAP2/HLA-F/HLA-DOA/CNTNAP1/ICAM2/CD40/IT…	OV
KEGG_PENTOSE_AND_GLUCURONATE_INTERCONVERSIONS	KEGG_PENTOSE_AND_GLUCURONATE_INTERCONVERSIONS	28	-0.826356	-1.71406	0.0322581	0.249322	0.212523	1203	tags=36%, list=6%, signal=34%	UGT1A6/UGT2B11/UGT1A8/UGT1A10/UGT2B28/UGT1A7/UGT1A9/UGT1A1/UGT2A3/UGT1A5	OV
KEGG_STARCH_AND_SUCROSE_METABOLISM	KEGG_STARCH_AND_SUCROSE_METABOLISM	50	-0.736359	-1.71148	0.0273973	0.249322	0.212523	2429	tags=40%, list=12%, signal=35%	UGT2B15/UGT1A3/MGAM/AMY1A/G6PC2/GCK/UGT1A6/ENPP3/AMY2A/UGT2B11/AMY1C/UGT1A8/UGT1A10/UGT2B28/UGT1A7/UGT1A9/SI/UGT1A1/UGT2A3/UGT1A5	OV
KEGG_B_CELL_RECEPTOR_SIGNALING_PATHWAY	KEGG_B_CELL_RECEPTOR_SIGNALING_PATHWAY	75	0.585804	1.69866	0.047619	0.249322	0.212523	4037	tags=43%, list=21%, signal=34%	CD79A/PIK3CG/LILRB3/BTK/FCGR2B/PIK3R5/AKT3/PRKCB/CD79B/INPP5D/RASGRP3/PIK3AP1/RAC2/VAV1/CD72/PIK3CD/NFATC1/PPP3CC/LYN/DAPP1/CARD11/BLNK/PPP3CA/PLCG2/MALT1/FOS/VAV3/NFATC4/NFKB1/CD19/MAPK1/IKBKG	OV
KEGG_ALLOGRAFT_REJECTION	KEGG_ALLOGRAFT_REJECTION	35	0.688639	1.65782	0.027027	0.249322	0.212523	3110	tags=66%, list=16%, signal=55%	CD80/IFNG/IL10/CD40LG/IL12B/CD28/FASLG/CD86/PRF1/GZMB/IL2/TNF/HLA-DQA1/HLA-DQA2/HLA-DQB1/FAS/HLA-DRB5/HLA-DPA1/HLA-DPB1/HLA-F/HLA-DOA/IL12A/CD40	OV
KEGG_ASCORBATE_AND_ALDARATE_METABOLISM	KEGG_ASCORBATE_AND_ALDARATE_METABOLISM	25	-0.814732	-1.64796	0.031746	0.249322	0.212523	1203	tags=40%, list=6%, signal=38%	UGT1A6/UGT2B11/UGT1A8/UGT1A10/UGT2B28/UGT1A7/UGT1A9/UGT1A1/UGT2A3/UGT1A5	OV
KEGG_MATURITY_ONSET_DIABETES_OF_THE_YOUNG	KEGG_MATURITY_ONSET_DIABETES_OF_THE_YOUNG	25	-0.812016	-1.64247	0.031746	0.249322	0.212523	1536	tags=48%, list=8%, signal=44%	GCK/FOXA2/NKX2-2/HNF1B/MNX1/NEUROG3/NEUROD1/HNF4A/PDX1/HNF1A/ONECUT1/PAX4	OV
KEGG_INTESTINAL_IMMUNE_NETWORK_FOR_IGA_PRODUCTION	KEGG_INTESTINAL_IMMUNE_NETWORK_FOR_IGA_PRODUCTION	46	0.593372	1.59268	0.0277778	0.249322	0.212523	3110	tags=59%, list=16%, signal=50%	TNFRSF13B/ICOS/TNFRSF17/CD80/IL6/CXCL12/IL10/CD40LG/ITGA4/CD28/CD86/IL2/TNFSF13B/AICDA/HLA-DQA1/IL15/HLA-DQA2/TGFB1/HLA-DQB1/ITGB7/HLA-DRB5/HLA-DPA1/IL15RA/MADCAM1/HLA-DPB1/HLA-DOA/CD40	OV
KEGG_LYSOSOME	KEGG_LYSOSOME	121	0.526906	1.58898	0.04	0.249322	0.212523	5308	tags=49%, list=27%, signal=36%	CTSK/CTSG/ATP6V0D2/CTSE/DNASE2B/CD68/ARSB/SLC11A1/CTSW/LAPTM5/CTSS/AP4E1/CTSO/ACP5/GNPTAB/CTSL/LIPA/GM2A/CTSH/HEXB/NPC1/SMPD1/AP1B1/GALNS/CTSZ/CLTCL1/MANBA/CTSC/LGMN/IGF2R/ARSA/NAGA/CTSB/PLA2G15/CTSA/TPP1/ATP6V0D1/LAMP3/IDS/GAA/ATP6V0A2/GNS/ATP6V0A4/SCARB2/LAPTM4B/AP3S1/AGA/CTSD/GALC/PSAP/MCOLN1/NAGLU/ATP6AP1/ABCB9/GLA/ENTPD4/NPC2/CLTC/AP1S2	OV
KEGG_METABOLISM_OF_XENOBIOTICS_BY_CYTOCHROME_P450	KEGG_METABOLISM_OF_XENOBIOTICS_BY_CYTOCHROME_P450	68	-0.648136	-1.55107	0.0273973	0.249322	0.212523	3302	tags=50%, list=17%, signal=42%	UGT2B17/CYP3A4/GSTM2/GSTA5/AKR1C3/CYP2E1/CYP1A2/CYP3A5/CYP1A1/UGT2B15/AKR1C1/ADH1A/UGT1A3/CYP2C19/ALDH3A1/ADH7/GSTA1/CYP2C8/UGT1A6/GSTA2/AKR1C4/UGT2B11/ADH6/UGT1A8/UGT1A10/UGT2B28/UGT1A7/CYP2C18/UGT1A9/GSTA3/CYP2B6/UGT1A1/UGT2A3/UGT1A5	OV
KEGG_EPITHELIAL_CELL_SIGNALING_IN_HELICOBACTER_PYLORI_INFECTION	KEGG_EPITHELIAL_CELL_SIGNALING_IN_HELICOBACTER_PYLORI_INFECTION	68	0.522526	1.54403	0.0344828	0.249322	0.212523	4745	tags=40%, list=24%, signal=30%	ATP6V1G3/ATP6V0D2/JAM2/CCL5/JAM3/CXCL1/CXCL8/CXCR2/MAPK11/HBEGF/CXCR1/PTPRZ1/MAPK12/LYN/ATP6V1B2/ATP6V1C1/PLCG2/MAPK9/NFKB1/IKBKG/ATP6V0D1/CASP3/ADAM10/ADAM17/ATP6V0A2/NFKBIA/ATP6V0A4	OV
KEGG_OLFACTORY_TRANSDUCTION	KEGG_OLFACTORY_TRANSDUCTION	359	-0.530033	-1.52716	0.010989	0.249322	0.212523	1651	tags=39%, list=8%, signal=36%	OR56B4/OR2S2/OR51I1/OR11L1/OR4D1/OR2C1/OR52N2/OR1N2/OR9A4/OR2F2/OR6B1/OR10H5/OR10G7/OR5M11/OR52B6/OR6S1/OR2AK2/OR2L2/OR52E4/OR2A4/OR8B12/OR8G1/OR13G1/OR4A47/OR51I2/OR3A3/OR2L3/OR10H3/OR13F1/OR56A5/OR2T29/OR2D3/OR5B12/OR52M1/OR6C76/OR8U1/OR1Q1/OR6B2/OR8D1/OR56A1/OR10S1/OR8J3/OR11H6/OR10A4/OR7E24/OR6C6/OR2T8/OR10J5/OR2L13/OR51G2/OR1J1/OR2T5/OR5B17/OR51M1/OR2T4/OR7G3/OR8D4/PRKACG/OR56B1/OR2AG1/OR2M4…	OV
KEGG_DRUG_METABOLISM_OTHER_ENZYMES	KEGG_DRUG_METABOLISM_OTHER_ENZYMES	51	-0.650385	-1.52319	0.0405405	0.249322	0.212523	2429	tags=39%, list=12%, signal=34%	CYP3A43/NAT2/UGT2B10/UGT2B17/CYP3A4/CYP3A5/UGT2B15/UGT1A3/CES5A/UPP2/UGT1A6/UGT2B11/UGT1A8/UGT1A10/UGT2B28/UGT1A7/UGT1A9/UGT1A1/UGT2A3/UGT1A5	OV
KEGG_GLIOMA	KEGG_GLIOMA	65	0.530452	1.51795	0.0357143	0.249322	0.212523	3573	tags=26%, list=18%, signal=21%	CALML5/PIK3CG/CAMK2A/PDGFRA/IGF1/PIK3R5/PDGFRB/AKT3/PRKCB/CALML3/PIK3CD/CDKN1A/PDGFB/PRKCA/SHC2/CAMK2D/PLCG2	OV
KEGG_APOPTOSIS	KEGG_APOPTOSIS	87	0.487242	1.47694	0.037037	0.249322	0.212523	4897	tags=43%, list=25%, signal=32%	CSF2RB/PIK3CG/IRAK3/FASLG/PIK3R5/AKT3/IL1B/IL3/TNF/IL1A/PIK3CD/NTRK1/FAS/TNFRSF10D/PPP3CC/IRAK2/IL1RAP/PRKACB/BIRC3/PPP3CA/TNFSF10/IL1R1/BID/NFKB1/IKBKG/IRAK4/CASP7/BAX/TNFRSF10C/CASP3/PRKX/IL3RA/NFKBIA/MYD88/PIK3CA/IRAK1/APAF1	OV
KEGG_CARDIAC_MUSCLE_CONTRACTION	KEGG_CARDIAC_MUSCLE_CONTRACTION	73	-0.585952	-1.46179	0.0240964	0.249322	0.212523	3023	tags=25%, list=15%, signal=21%	CACNG7/CACNG5/CACNA2D2/TNNT2/COX6A2/COX6B2/CACNA1F/FXYD2/ATP1B2/CACNG2/ATP1A2/ATP1A4/CACNG3/CACNG6/CACNA1S/ATP1B4/MYH7/MYH6	OV
KEGG_FC_EPSILON_RI_SIGNALING_PATHWAY	KEGG_FC_EPSILON_RI_SIGNALING_PATHWAY	79	0.494592	1.4439	0.0454545	0.249322	0.212523	3107	tags=32%, list=16%, signal=27%	MS4A2/PLA2G2D/FCER1A/CSF2/PLA2G2A/PIK3CG/BTK/PIK3R5/LCP2/PLA2G5/AKT3/PRKCB/INPP5D/IL3/TNF/MAPK11/RAC2/VAV1/PIK3CD/FCER1G/MAPK12/IL13/PRKCA/PLA2G3/LYN	OV
KEGG_FC_GAMMA_R_MEDIATED_PHAGOCYTOSIS	KEGG_FC_GAMMA_R_MEDIATED_PHAGOCYTOSIS	95	0.472022	1.43647	0.0384615	0.249322	0.212523	3277	tags=27%, list=17%, signal=23%	SPHK1/PIK3CG/DOCK2/PTPRC/FCGR2B/FCGR1A/PIK3R5/FCGR2A/HCK/NCF1/AKT3/PRKCB/FCGR3A/INPP5D/WAS/RAC2/VAV1/PIK3CD/AMPH/PLPP1/DNM1/MARCKS/PRKCA/LYN/LIMK2/PLD1	OV
KEGG_VASCULAR_SMOOTH_MUSCLE_CONTRACTION	KEGG_VASCULAR_SMOOTH_MUSCLE_CONTRACTION	112	0.47046	1.43027	0.037037	0.249322	0.212523	3325	tags=35%, list=17%, signal=29%	ACTG2/AGTR1/PRKG1/PTGIR/PLA2G2D/ADRA1A/CALML5/AVPR1A/CYP4A11/PLA2G2A/EDNRA/KCNMB1/CACNA1C/CYP4A22/MYH11/ACTA2/PLA2G5/ADORA2A/PRKCB/RAMP3/ADRA1B/CALML3/CALCRL/ADCY7/MYLK/CALD1/AVPR1B/ADCY4/PLCB2/PPP1R12B/GUCY1A2/RAMP1/ADCY9/PRKCA/PLA2G3/ADRA1D/PRKACB/PRKCH/PLA2G2F	OV
KEGG_RETINOL_METABOLISM	KEGG_RETINOL_METABOLISM	64	-0.601133	-1.42947	0.0410959	0.249322	0.212523	2429	tags=45%, list=12%, signal=40%	UGT2B17/CYP3A4/LRAT/CYP1A2/CYP3A5/CYP1A1/UGT2B15/RDH12/ADH1A/UGT1A3/BCO1/CYP2C19/ADH7/CYP2C8/RDH8/UGT1A6/UGT2B11/ADH6/UGT1A8/UGT1A10/UGT2B28/UGT1A7/RPE65/CYP2C18/UGT1A9/CYP2B6/UGT1A1/UGT2A3/UGT1A5	OV
KEGG_BLADDER_CANCER	KEGG_BLADDER_CANCER	42	0.55724	1.42064	0.027027	0.249322	0.212523	2637	tags=21%, list=13%, signal=19%	MMP1/MMP9/THBS1/MMP2/CXCL8/TYMP/PGF/VEGFC/CDKN1A	OV
KEGG_PANCREATIC_CANCER	KEGG_PANCREATIC_CANCER	70	0.475952	1.41714	0.0357143	0.249322	0.212523	4799	tags=36%, list=24%, signal=27%	PIK3CG/PIK3R5/TGFB3/AKT3/ARHGEF6/RAC2/TGFB1/PIK3CD/PGF/VEGFC/TGFBR2/PLD1/TGFBR1/MAPK9/NFKB1/RB1/MAPK1/IKBKG/CDKN2A/SMAD2/STAT3/RALB/TGFB2/PIK3CA/RAD51	OV
KEGG_DRUG_METABOLISM_CYTOCHROME_P450	KEGG_DRUG_METABOLISM_CYTOCHROME_P450	70	-0.586281	-1.40706	0.0405405	0.249322	0.212523	3302	tags=50%, list=17%, signal=42%	FMO5/CYP3A43/UGT2B10/UGT2B17/MAOA/CYP3A4/GSTM2/GSTA5/MAOB/CYP2E1/CYP1A2/CYP3A5/UGT2B15/ADH1A/UGT1A3/CYP2C19/ALDH3A1/ADH7/GSTA1/CYP2C8/UGT1A6/GSTA2/UGT2B11/ADH6/UGT1A8/UGT1A10/UGT2B28/UGT1A7/CYP2C18/UGT1A9/GSTA3/CYP2B6/UGT1A1/UGT2A3/UGT1A5	OV
KEGG_NATURAL_KILLER_CELL_MEDIATED_CYTOTOXICITY	KEGG_NATURAL_KILLER_CELL_MEDIATED_CYTOTOXICITY	131	0.456377	1.39541	0.037037	0.249322	0.212523	2443	tags=35%, list=12%, signal=31%	KIR2DL3/SH2D1A/KIR2DL1/IFNG/CSF2/FCGR3B/KLRK1/KIR3DL2/PIK3CG/CD244/KIR3DL1/CD247/FASLG/CD48/PIK3R5/ZAP70/ULBP2/ITGAL/LCP2/PRF1/GZMB/KLRC1/PRKCB/KLRD1/NCR3/LCK/RAET1L/FCGR3A/ITGB2/IFNA1/NCR1/IFNA8/TNF/KLRC3/SH2D1B/ICAM1/RAC2/VAV1/PIK3CD/NFATC1/FAS/TNFRSF10D/PPP3CC/KLRC2/KIR2DL4/FCER1G	OV
KEGG_TGF_BETA_SIGNALING_PATHWAY	KEGG_TGF_BETA_SIGNALING_PATHWAY	85	0.467113	1.38733	0.0434783	0.249322	0.212523	2237	tags=20%, list=11%, signal=18%	INHBA/GDF6/THBS2/COMP/PITX2/IFNG/DCN/BMP4/THBS1/BMP2/CHRD/TGFB3/ACVRL1/TNF/TGFB1/FST/CDKN2B	OV
KEGG_JAK_STAT_SIGNALING_PATHWAY	KEGG_JAK_STAT_SIGNALING_PATHWAY	155	0.448823	1.35427	0.047619	0.249322	0.212523	2154	tags=29%, list=11%, signal=26%	IL7R/IL26/IL21R/CRLF2/LEP/IFNK/IL9R/IL6/IL21/IFNG/IL2RA/CSF2/CSF2RB/IL22RA2/PRL/IL10/PIK3CG/OSM/IL12B/PIK3R5/IL20/IL22/CSF2RA/IL2RB/IL10RA/STAT4/IL12RB1/IL24/IL2/IL2RG/AKT3/CSF3R/GHR/LIF/IL3/IFNA1/IFNA8/CSH1/IL4R/IL7/IL15/IFNL1/PIK3CD/OSMR/IL11	OV
KEGG_TASTE_TRANSDUCTION	KEGG_TASTE_TRANSDUCTION	51	-0.680859	-1.47697	0.0449438	1	1	2859	tags=47%, list=15%, signal=40%	TAS2R46/SCNN1G/TAS2R7/TAS2R50/TAS2R40/TAS2R9/TAS2R10/GNAT3/TAS1R1/GNG3/GNG13/TAS2R16/SCNN1B/TAS2R1/TRPM5/CACNA1A/ASIC2/GRM4/TAS1R2/TAS2R8/PRKACG/KCNB1/CACNA1B/ADCY8	PAAD
KEGG_LONG_TERM_POTENTIATION	KEGG_LONG_TERM_POTENTIATION	70	-0.6557	-1.47567	0.021978	1	1	1570	tags=17%, list=8%, signal=16%	PPP1R1A/RPS6KA6/ADCY1/GRIN2C/CAMK2B/GRIN1/GRIA2/CALML3/GRM1/PRKACG/GRIA1/ADCY8	PAAD
KEGG_NEUROACTIVE_LIGAND_RECEPTOR_INTERACTION	KEGG_NEUROACTIVE_LIGAND_RECEPTOR_INTERACTION	271	-0.606296	-1.44077	0.010101	1	1	3295	tags=49%, list=17%, signal=41%	CYSLTR1/GRIN3A/ADORA2A/GRM6/TRPV1/GHSR/CHRNB4/GABRA2/PRL/NMBR/CHRNA7/NPBWR2/P2RY10/CHRNA3/CALCR/CHRM5/GCGR/GRIK4/GHR/CHRNA9/SSTR5/P2RX1/AVPR2/DRD5/ADRA1D/CTSG/P2RY4/TAAR5/GLP2R/CRHR1/HTR2A/HCRTR1/NPY5R/GH1/GRIK2/DRD3/CRHR2/P2RY14/MC4R/SSTR1/GLP1R/LHCGR/NTSR2/PTH2R/VIPR1/NMUR1/GH2/GRIK3/P2RX5/PTGFR/ADRB1/TAAR9/GABRG1/ADCYAP1R1/GRPR/TSHB/CHRM4/TSHR/P2RX2/CHRM3/GRIA3/GHRHR/GRIA4/ADRA1A/BRS3/GALR3/GR…	PAAD
KEGG_CARDIAC_MUSCLE_CONTRACTION	KEGG_CARDIAC_MUSCLE_CONTRACTION	73	-0.634476	-1.42748	0.0340909	1	1	2677	tags=30%, list=14%, signal=26%	CACNA1D/CACNB4/SLC8A1/FXYD2/CACNG3/CACNA2D3/ATP1B2/COX8C/CACNG1/RYR2/CACNA1S/CACNA2D2/ACTC1/CACNG5/CACNB2/ATP1A2/ATP1A3/MYH7/COX6A2/CACNG7/MYH6/CACNG2	PAAD
KEGG_STARCH_AND_SUCROSE_METABOLISM	KEGG_STARCH_AND_SUCROSE_METABOLISM	50	-0.654232	-1.42274	0.0444444	1	1	2756	tags=42%, list=14%, signal=36%	UGT2B15/TREH/G6PC2/PYGM/AMY2B/AMY2A/UGT2A1/UGT1A4/GYS2/UGT1A5/GCK/MGAM/ENPP3/UGT2B11/SI/UGT2B17/UGT2B4/UGT2B10/AMY1B/AMY1C/AMY1A	PAAD
KEGG_AMYOTROPHIC_LATERAL_SCLEROSIS_ALS	KEGG_AMYOTROPHIC_LATERAL_SCLEROSIS_ALS	53	-0.651829	-1.40966	0.0444444	1	1	1711	tags=17%, list=9%, signal=16%	NOS1/NEFL/NEFM/GRIN2C/PRPH/GRIN1/SLC1A2/GRIA2/GRIA1	PAAD
KEGG_CALCIUM_SIGNALING_PATHWAY	KEGG_CALCIUM_SIGNALING_PATHWAY	177	-0.569844	-1.33209	0.0315789	1	1	3669	tags=35%, list=19%, signal=29%	GNA14/ADRB3/MYLK2/ADCY2/MYLK3/AGTR1/PLCD4/ATP2A3/CACNA1C/CYSLTR1/ADORA2A/CHRNA7/CACNA1D/CHRM5/PRKCG/PRKCB/P2RX1/CACNA1G/SLC8A1/DRD5/ADRA1D/HTR2A/LHCGR/P2RX5/PTGFR/ADRB1/GRPR/PDE1C/P2RX2/NOS1/CHRM3/RYR2/CACNA1S/RYR3/ADRA1A/CACNA1A/ERBB4/ADCY1/TACR2/CACNA1I/GRIN2C/CAMK2B/HTR4/P2RX6/ATP2B3/TACR1/SLC8A2/CCKBR/CHRM1/AVPR1B/GRIN1/SLC8A3/CALML3/GRM1/PRKACG/CACNA1B/CCKAR/ATP2B2/TACR3/CHRM2/ADCY8/HTR5A	PAAD
KEGG_MATURITY_ONSET_DIABETES_OF_THE_YOUNG	KEGG_MATURITY_ONSET_DIABETES_OF_THE_YOUNG	25	-0.845536	-1.6297	0.0181818	1	1	1362	tags=48%, list=7%, signal=45%	HNF4G/ONECUT1/HNF1B/NKX2-2/MAFA/FOXA3/NEUROD1/IAPP/HNF4A/HNF1A/FOXA2/PDX1	PCPG
KEGG_OLFACTORY_TRANSDUCTION	KEGG_OLFACTORY_TRANSDUCTION	359	-0.490986	-1.33412	0.0289855	1	1	782	tags=27%, list=4%, signal=27%	OR51A7/OR13F1/OR7A10/OR8D4/OR9A4/OR6B3/OR5AN1/OR56A3/OR52K2/OR1L4/OR6M1/OR10G3/OR10H2/OR2T12/OR51E2/OR10J3/OR6S1/PDC/OR2A4/OR11G2/OR13A1/OR2AG1/CNGA3/OR56B1/OR1G1/OR4M1/OR13H1/OR9K2/OR6B2/OR51M1/CLCA4/OR14I1/OR4F6/OR6C75/OR13C9/OR5P2/OR7E24/OR10H1/OR4K14/OR4D2/OR52D1/OR2Z1/OR6F1/OR2J2/OR6V1/OR8A1/OR1I1/OR10Q1/OR4C11/OR1N2/OR4C15/OR8G5/OR52A1/OR9Q2/OR5T2/OR10G8/OR52K1/OR5D16/OR6C4/OR52E2/OR2T1/OR4…	PCPG
KEGG_PRIMARY_IMMUNODEFICIENCY	KEGG_PRIMARY_IMMUNODEFICIENCY	35	0.775992	1.47627	0.0224719	0.516854	0.514488	3026	tags=66%, list=15%, signal=56%	AICDA/TNFRSF13B/CD19/IGLL1/ICOS/TNFRSF13C/AIRE/CD40LG/CD79A/ZAP70/JAK3/PTPRC/IL7R/BTK/CD8B/RAG1/CD3E/CD3D/CIITA/RAG2/LCK/IL2RG/CD8A	PRAD
KEGG_OLFACTORY_TRANSDUCTION	KEGG_OLFACTORY_TRANSDUCTION	359	0.663409	1.41253	0.00990099	0.516854	0.514488	1886	tags=45%, list=10%, signal=42%	OR5T3/OR4A5/OR8K5/OR4A16/OR11H1/OR8B4/OR4F3/OR6Q1/OR5D18/OR5L2/OR5T2/OR8H1/OR8J1/OR2AG1/OR10G8/OR1E2/OR4D11/OR5B17/OR4K17/OR2M7/OR10T2/OR4S2/OR10AG1/OR5T1/OR4C15/OR4D5/OR4F4/OR5A2/OR6C68/OR5I1/OR8U1/OR12D3/OR1S2/OR5A1/OR10J3/OR7G1/OR6C70/OR52B2/OR13C8/OR10J1/OR9I1/OR9G1/OR13C4/OR8B12/OR4D10/OR8K1/OR10K2/OR2S2/OR5AU1/OR6N2/OR6K2/OR4F17/OR6B3/OR5AS1/OR5M8/OR4A47/OR4D6/OR1D2/OR9Q1/OR4C6/OR5B21/OR7D4…	PRAD
KEGG_REGULATION_OF_AUTOPHAGY	KEGG_REGULATION_OF_AUTOPHAGY	35	0.720688	1.37106	0.0224719	0.516854	0.514488	2201	tags=29%, list=11%, signal=25%	IFNA4/INS/IFNA10/IFNG/IFNA16/IFNA7/IFNA14/IFNA13/IFNA6/BECN2	PRAD
KEGG_HEMATOPOIETIC_CELL_LINEAGE	KEGG_HEMATOPOIETIC_CELL_LINEAGE	85	0.665149	1.35677	0.0210526	0.516854	0.514488	4145	tags=49%, list=21%, signal=39%	CR2/FCER2/MS4A1/CD19/CSF2/CD1B/CD3G/CD22/CR1/FLT3/CD1A/GYPA/ITGA4/GP5/CD5/IL2RA/CD1E/IL9R/GP1BA/DNTT/IL7R/CD1C/ITGA2B/CD8B/IL1R2/TNF/IL1A/CD3E/CD3D/CD2/CD37/GP9/CD8A/CSF2RA/CD7/CD1D/IL4/CD4/ITGAM/FCGR1A/IL5/IL7	PRAD
KEGG_INTESTINAL_IMMUNE_NETWORK_FOR_IGA_PRODUCTION	KEGG_INTESTINAL_IMMUNE_NETWORK_FOR_IGA_PRODUCTION	46	0.687452	1.34915	0.0217391	0.516854	0.514488	4366	tags=61%, list=22%, signal=47%	AICDA/TNFRSF13B/CCL27/TNFRSF17/ICOS/TNFRSF13C/CD80/CD40LG/ITGB7/HLA-DOB/IL2/ITGA4/CD28/TNFSF13B/CCR9/CD86/IL4/HLA-DQA2/IL15/HLA-DMB/IL10/CCL28/IL5/HLA-DQA1/CXCR4/ICOSLG/HLA-DOA/CCR10	PRAD
KEGG_NATURAL_KILLER_CELL_MEDIATED_CYTOTOXICITY	KEGG_NATURAL_KILLER_CELL_MEDIATED_CYTOTOXICITY	131	0.645199	1.3467	0.020202	0.516854	0.514488	4513	tags=47%, list=23%, signal=37%	IFNA4/KIR2DL1/IFNA10/KIR2DL3/CSF2/NCR1/KLRC2/PRKCG/NCR3/IFNG/KLRC3/IFNA16/IFNA7/SH2D1B/IFNA14/ULBP2/FASLG/PIK3CG/IFNA13/ZAP70/CD247/KIR3DL1/ULBP1/KLRK1/IFNA6/RAET1L/IFNB1/ITGAL/KIR2DL4/RAET1E/NCR2/KLRD1/MICB/VAV1/LAT/TNF/PLCG2/CD48/IFNA5/PRKCB/PIK3CD/LCK/SH2D1A/KLRC1/CD244/VAV3/LCP2/RAC2/PRF1/PIK3R5/GZMB/FYN/IFNA1/SHC4/ULBP3/FCGR3A/SYK/RAET1G/NFAT5/NFATC2/ITGB2/PRKCA	PRAD
KEGG_CYTOKINE_CYTOKINE_RECEPTOR_INTERACTION	KEGG_CYTOKINE_CYTOKINE_RECEPTOR_INTERACTION	263	0.620224	1.31572	0.00990099	0.516854	0.514488	4433	tags=47%, list=23%, signal=37%	IFNA4/CXCR5/IL21/TNFRSF13B/IFNL2/TNFSF11/CCL27/IFNA10/IL12B/CD70/CCR6/CCL15/LTA/CSF2/CCR8/TNFRSF9/TNFRSF17/TNFRSF13C/IL17A/IL22RA2/IL21R/CXCL13/PPBP/IL26/CCR4/IFNG/IFNA16/IFNA7/CD40LG/CCR3/XCR1/IFNA14/CCR7/FLT3/IL12RB2/FASLG/IFNL3/IL2/IL22/IFNA13/XCL2/IFNL1/TNFSF8/AMH/IL2RA/IL22RA1/INHBA/CD27/IL23R/CXCR3/IFNA6/CNTF/IL12RB1/CCL24/IL19/BMP2/TNFSF14/CCL13/IL24/XCL1/LTB/IFNB1/TNFRSF8/IL9R/PRLR/CCL20/…	PRAD
KEGG_NEUROACTIVE_LIGAND_RECEPTOR_INTERACTION	KEGG_NEUROACTIVE_LIGAND_RECEPTOR_INTERACTION	271	0.594851	1.25929	0.019802	0.516854	0.514488	3985	tags=44%, list=20%, signal=36%	MCHR2/GABRG1/GLRA3/GHSR/GABRA6/HCRTR2/MC4R/NPBWR2/CNR2/DRD3/MC2R/GRIA4/TAAR9/MTNR1B/BRS3/SSTR3/AVPR1B/PRSS2/GLRA1/CHRM2/GABRA1/CHRNA9/GABRA3/CHRNB2/GRM8/HTR1E/MC3R/CHRNA6/GRIN3B/P2RY10/HTR1A/GPR83/PRSS1/TSHR/TRHR/CGA/TACR3/HTR2A/HTR1F/GABRA2/GABRB1/GABBR2/GLP2R/NTSR2/CCKAR/P2RX3/OPRM1/HTR1D/DRD2/GLRA2/CHRNB4/HTR4/NPFFR1/NTSR1/GABRA4/CYSLTR2/GRM7/PRSS3/CHRNA4/SSTR4/PTGDR/CHRNB3/HTR6/PRLR/GABRB2/PT…	PRAD
KEGG_TYPE_I_DIABETES_MELLITUS	KEGG_TYPE_I_DIABETES_MELLITUS	41	0.696674	1.33959	0.0333333	0.681481	0.678363	4296	tags=54%, list=22%, signal=42%	GAD2/INS/IL12B/LTA/CD80/IFNG/FASLG/HLA-DOB/IL2/CD28/PTPRN/IL12A/TNF/IL1A/CD86/GAD1/PRF1/HLA-DQA2/HLA-DMB/GZMB/HLA-DQA1/HLA-DOA	PRAD
KEGG_AUTOIMMUNE_THYROID_DISEASE	KEGG_AUTOIMMUNE_THYROID_DISEASE	50	0.659293	1.27608	0.043956	0.79516	0.791521	4340	tags=60%, list=22%, signal=47%	IFNA4/IFNA10/CD80/TSHR/CGA/IFNA16/IFNA7/TG/CD40LG/CTLA4/IFNA14/FASLG/HLA-DOB/IL2/IFNA13/CD28/IFNA6/IFNA5/CD86/PRF1/IL4/HLA-DQA2/HLA-DMB/GZMB/IL10/IL5/HLA-DQA1/TSHB/HLA-DOA/IFNA1	PRAD
KEGG_OLFACTORY_TRANSDUCTION	KEGG_OLFACTORY_TRANSDUCTION	359	-0.576536	-1.57163	0.047619	1	1	565	tags=28%, list=3%, signal=28%	OR1L1/OR2B3/OR10C1/OR11H4/OR2AE1/OR10G9/OR52W1/OR13A1/OR2W1/OR6S1/OR2A25/OR5A1/OR13H1/OR6N1/OR1L6/OR7G1/OR6C65/OR6B1/OR52B6/OR4D9/OR4K1/OR2A4/OR5B21/OR10A2/OR2A5/OR51I1/OR2T2/OR13D1/OR6F1/OR1E1/OR1A1/OR8D1/OR11G2/OR6C3/OR6C70/OR1N2/OR2T33/OR13G1/OR52M1/OR10A4/OR52E2/OR51T1/OR2B2/OR2T3/OR52L1/OR1D5/OR52E8/OR5J2/OR2T4/OR4M2/OR4B1/OR2T29/OR8K5/OR4C12/OR8J1/OR2T27/OR4K2/OR5M8/OR1M1/OR4F5/OR13C3/OR2G6…	READ
KEGG_CHEMOKINE_SIGNALING_PATHWAY	KEGG_CHEMOKINE_SIGNALING_PATHWAY	187	0.637941	1.56866	0.0149254	1	1	4274	tags=41%, list=22%, signal=32%	CCL27/CCL7/CCL1/CCL8/CCL13/CCL17/PPBP/CCL3/CCL3L3/CCR3/CCR8/CCL18/CCR2/ADCY2/CXCL11/CCL4/GRK7/XCL2/PF4V1/NCF1/CCL4L2/CXCL10/CXCL9/PIK3R5/TIAM1/SHC4/CCL23/GNGT2/CCR1/ADCY8/CCR5/CCL2/FGR/HCK/CXCL13/DOCK2/XCR1/CX3CR1/SHC3/GNG13/CCR10/GNB4/CCL21/PRKACG/CXCR1/CX3CL1/GNG8/ITK/CCR4/PIK3CG/WAS/CCL25/CXCR6/CCL5/AKT3/ELMO1/CCL19/CXCL8/CXCR2/VAV1/CCL22/CXCR4/PLCB2/CXCL5/PRKCB/ADCY5/GNB5/CXCL12/ADCY1/GNG11/C…	READ
KEGG_CYTOKINE_CYTOKINE_RECEPTOR_INTERACTION	KEGG_CYTOKINE_CYTOKINE_RECEPTOR_INTERACTION	263	0.578287	1.49083	0.0131579	1	1	3806	tags=47%, list=19%, signal=38%	IFNA7/IFNA17/IFNA8/IFNA13/IFNA6/CCL27/LEP/IL13/IFNA1/PRL/IFNW1/CCL7/IL25/CCL1/CCL8/CCL13/GH1/CD70/CCL17/PPBP/TGFB3/IL10/CCL3/CCL3L3/CCR3/NGFR/CCR8/EDA2R/CSF2RA/IL9R/CCL18/TNFSF4/CCR2/IFNG/EGF/TNFRSF9/CXCL11/OSM/TNFSF18/LTA/CCL4/XCL2/IL6/IL5RA/PF4V1/IL21R/FASLG/CCL4L2/CXCL10/CSF2/PDGFC/CXCL9/TNFRSF19/TNFSF8/TNFSF13B/TNFRSF8/CCL23/CSF3R/VEGFC/TNFSF9/CCR1/TNF/CCR5/GHR/CCL2/TNFRSF4/TNFSF14/INHBA/CXCL…	READ
KEGG_RIG_I_LIKE_RECEPTOR_SIGNALING_PATHWAY	KEGG_RIG_I_LIKE_RECEPTOR_SIGNALING_PATHWAY	70	0.66703	1.43752	0.0441176	1	1	394	tags=10%, list=2%, signal=10%	IFNA7/IFNA17/IFNA8/IFNA13/IFNA6/IFNA1/IFNW1	READ
KEGG_T_CELL_RECEPTOR_SIGNALING_PATHWAY	KEGG_T_CELL_RECEPTOR_SIGNALING_PATHWAY	108	0.627763	1.43538	0.0119048	1	1	2214	tags=22%, list=11%, signal=20%	ICOS/CHP2/PPP3R2/CTLA4/IFNG/IL2/ITK/PDCD1/CD3G/CD8B/GRAP2/CD8A/CSF2/CD40LG/CD247/CD3E/CD3D/ZAP70/LCK/LAT/CARD11/TNF/PRKCQ/RASGRP1	SARC
KEGG_CYTOKINE_CYTOKINE_RECEPTOR_INTERACTION	KEGG_CYTOKINE_CYTOKINE_RECEPTOR_INTERACTION	263	0.564049	1.41162	0.0240964	1	1	3723	tags=41%, list=19%, signal=33%	IFNA4/CCL27/IFNA10/IFNA17/IFNL2/TNFRSF13B/CCR8/IL19/CCL22/CXCL14/XCR1/IL17A/IL12B/PRL/CCL1/IFNG/CXCL13/IFNL3/CCR4/IL20/IL2/CSF3/EDAR/IL9R/IL21/LTA/AMHR2/TNFSF18/TNFSF14/CCL17/FASLG/TNFRSF18/FLT3/CD27/CCR7/IL11/IFNB1/CXCR3/CCL19/TNFRSF9/CXCR6/IL21R/CCR3/TNFSF11/CD70/INHBC/TNFRSF17/IL22RA2/IL7R/CSF2/CCL24/TPO/CXCL11/CD40LG/IL17B/CXCL9/IL9/XCL1/GH2/IL13/TNFSF15/TNF/XCL2/CCR2/TNFRSF13C/TNFRSF25/IL1R2…	SARC
KEGG_OTHER_GLYCAN_DEGRADATION	KEGG_OTHER_GLYCAN_DEGRADATION	16	0.827688	1.47902	0.04	0.701149	0.701149	56	tags=6%, list=0%, signal=6%	NEU2	SKCM
KEGG_BASAL_CELL_CARCINOMA	KEGG_BASAL_CELL_CARCINOMA	55	0.721208	1.42357	0.0243902	0.701149	0.701149	3140	tags=38%, list=16%, signal=32%	WNT7B/WNT7A/WNT3A/FZD10/WNT16/SHH/WNT9B/WNT10A/WNT5A/WNT3/WNT11/BMP2/WNT4/WNT8B/WNT2B/BMP4/PTCH2/GLI2/WNT6/GLI1/WNT1	SKCM
KEGG_HEDGEHOG_SIGNALING_PATHWAY	KEGG_HEDGEHOG_SIGNALING_PATHWAY	56	0.718527	1.41706	0.0121951	0.701149	0.701149	2934	tags=45%, list=15%, signal=38%	WNT7B/WNT7A/WNT3A/WNT16/BMP5/SHH/WNT9B/WNT10A/WNT5A/WNT3/WNT11/BMP2/WNT4/WNT8B/BMP6/LRP2/WNT2B/DHH/BMP4/BMP7/PTCH2/GLI2/WNT6/PRKACG/GLI1	SKCM
KEGG_SPHINGOLIPID_METABOLISM	KEGG_SPHINGOLIPID_METABOLISM	39	0.735415	1.40575	0.0379747	0.701149	0.701149	1103	tags=13%, list=6%, signal=12%	NEU2/ACER1/DEGS2/SGPP2/SMPD3	SKCM
KEGG_VEGF_SIGNALING_PATHWAY	KEGG_VEGF_SIGNALING_PATHWAY	76	0.662985	1.35813	0.0224719	0.701149	0.701149	1119	tags=7%, list=6%, signal=6%	PLA2G3/CHP2/PLA2G2F/PLA2G4E/MAPK13	SKCM
KEGG_ARACHIDONIC_ACID_METABOLISM	KEGG_ARACHIDONIC_ACID_METABOLISM	58	0.670622	1.32558	0.0365854	0.701149	0.701149	1374	tags=24%, list=7%, signal=23%	PLA2G3/GGT6/PLA2G2F/CYP2C18/PLA2G4E/ALOX12B/GPX2/CYP4F2/CYP4F3/ALOX15/ALOX15B/CYP2C19/PTGS1/AKR1C3	SKCM
KEGG_TIGHT_JUNCTION	KEGG_TIGHT_JUNCTION	131	0.619644	1.29075	0.0322581	0.701149	0.701149	3862	tags=28%, list=20%, signal=23%	CLDN17/PPP2R2C/CRB3/CLDN4/CLDN19/CLDN8/TJP3/CLDN10/OCLN/CLDN1/CLDN16/MYL7/CLDN2/MYL2/MYH4/MAGI1/LLGL2/PATJ/MYH2/TJP2/MYH1/PRKCQ/MYH8/CLDN7/CLDN6/F11R/PPP2R2B/GNAI1/JAM2/CLDN20/CLDN3/MAP3K20/CGN/CLDN5/PRKCH/AFDN/MYH11	SKCM
KEGG_GLYCEROPHOSPHOLIPID_METABOLISM	KEGG_GLYCEROPHOSPHOLIPID_METABOLISM	76	0.629414	1.28936	0.0449438	0.701149	0.701149	3725	tags=21%, list=19%, signal=17%	PLA2G3/PLA2G2F/PLA2G4E/CHAT/CDS1/PLA2G10/GPD1/GPAT2/DGKA/PLPP2/PLD2/PLPP3/DGKE/MBOAT2/PLA2G5/PCYT1B	SKCM
KEGG_PHOSPHATIDYLINOSITOL_SIGNALING_SYSTEM	KEGG_PHOSPHATIDYLINOSITOL_SIGNALING_SYSTEM	76	0.622258	1.2747	0.0449438	0.701149	0.701149	761	tags=7%, list=4%, signal=6%	PIK3C2G/CALML3/CALML5/CDS1/PLCZ1	SKCM
KEGG_OLFACTORY_TRANSDUCTION	KEGG_OLFACTORY_TRANSDUCTION	359	0.876976	1.58996	0.00990099	0.2075	0.205263	1724	tags=77%, list=9%, signal=71%	OR51A2/OR10G9/OR5L2/OR4N4/OR10J1/OR8K5/OR6C1/OR5T1/OR4A5/OR5M1/OR5AS1/OR2T1/OR5T3/OR4S2/OR4A16/OR2T27/OR6C74/OR8B4/OR52E8/OR4C15/OR8I2/OR2T5/OR4A15/OR5AU1/OR4S1/OR9G1/OR8J3/OR13C4/OR6C76/OR5T2/OR13C9/OR5D16/OR9K2/OR4C13/OR5D14/OR56A1/OR5M9/OR5M3/OR5B17/OR5A2/OR4C3/OR2J3/OR4K1/OR4C11/OR1S2/OR4F4/OR4L1/OR52E4/OR2M2/OR51L1/OR4F17/OR52K1/OR8G1/OR2T29/OR4E2/OR51B6/OR6X1/OR4M1/OR5I1/OR8H3/OR10T2/OR6B3/…	STAD
KEGG_REGULATION_OF_AUTOPHAGY	KEGG_REGULATION_OF_AUTOPHAGY	35	0.859798	1.56139	0.01	0.2075	0.205263	1796	tags=40%, list=9%, signal=36%	IFNA10/IFNA17/IFNA16/IFNA7/IFNA14/IFNA6/IFNA2/IFNA13/IFNA4/IFNA8/IFNA21/IFNA5/INS/IFNG	STAD
KEGG_CYTOSOLIC_DNA_SENSING_PATHWAY	KEGG_CYTOSOLIC_DNA_SENSING_PATHWAY	54	0.791019	1.44941	0.00990099	0.2075	0.205263	1653	tags=24%, list=8%, signal=22%	IFNA10/IFNA17/IFNA16/IFNA7/IFNA14/IFNA6/IFNA2/IFNA13/IFNA4/IFNA8/IFNA21/IFNA5/IFNB1	STAD
KEGG_RIG_I_LIKE_RECEPTOR_SIGNALING_PATHWAY	KEGG_RIG_I_LIKE_RECEPTOR_SIGNALING_PATHWAY	70	0.780604	1.43801	0.00990099	0.2075	0.205263	1914	tags=20%, list=10%, signal=18%	IFNA10/IFNA17/IFNA16/IFNA7/IFNA14/IFNA6/IFNA2/IFNA13/IFNA4/IFNA8/IFNA21/IFNA5/IFNB1/IFNK	STAD
KEGG_AUTOIMMUNE_THYROID_DISEASE	KEGG_AUTOIMMUNE_THYROID_DISEASE	50	0.731651	1.34176	0.00990099	0.2075	0.205263	3916	tags=56%, list=20%, signal=45%	IFNA10/IFNA17/IFNA16/IFNA7/IFNA14/IFNA6/IFNA2/IFNA13/IFNA4/IFNA8/IFNA21/IFNA5/TSHR/CD80/GZMB/IFNA1/CD86/CTLA4/FASLG/IL10/IL2/HLA-DOA/HLA-G/FAS/TG/HLA-DQA1/IL4/PRF1	STAD
KEGG_ANTIGEN_PROCESSING_AND_PRESENTATION	KEGG_ANTIGEN_PROCESSING_AND_PRESENTATION	80	0.729898	1.33864	0.00990099	0.2075	0.205263	3614	tags=38%, list=18%, signal=31%	IFNA10/IFNA17/IFNA16/IFNA7/IFNA14/IFNA6/IFNA2/IFNA13/IFNA4/IFNA8/IFNA21/KIR3DL3/IFNA5/KLRD1/KLRC3/KLRC2/KIR2DL1/KLRC4/KIR2DL3/KIR3DL2/KLRC1/KIR3DL1/IFNA1/KIR2DL4/IFI30/CD8B/LTA/HLA-DOA/HLA-G/CD8A	STAD
KEGG_TOLL_LIKE_RECEPTOR_SIGNALING_PATHWAY	KEGG_TOLL_LIKE_RECEPTOR_SIGNALING_PATHWAY	102	0.701985	1.28411	0.00990099	0.2075	0.205263	3228	tags=25%, list=16%, signal=21%	IFNA10/IFNA17/IFNA16/IFNA7/IFNA14/IFNA6/IFNA2/IFNA13/IFNA4/IFNA8/IFNA21/IFNA5/IFNB1/CXCL11/TLR8/LBP/CD80/CXCL10/CCL3/IFNA1/CD86/CXCL9/SPP1/TLR7/CCL4	STAD
KEGG_NATURAL_KILLER_CELL_MEDIATED_CYTOTOXICITY	KEGG_NATURAL_KILLER_CELL_MEDIATED_CYTOTOXICITY	131	0.700446	1.28365	0.00990099	0.2075	0.205263	4393	tags=40%, list=22%, signal=32%	IFNA10/IFNA17/IFNA16/IFNA7/IFNA14/IFNA6/IFNA2/IFNA13/IFNA4/IFNA8/IFNA21/PPP3R2/IFNA5/IFNB1/IFNG/KLRD1/KLRC3/RAET1L/KLRC2/KIR2DL1/KLRK1/NCR1/CD244/KIR2DL3/PRKCG/KIR3DL2/KLRC1/KIR3DL1/GZMB/IFNA1/FCGR3A/FASLG/KIR2DL4/SH2D1A/HLA-G/MICB/FAS/ULBP2/CD247/ITGB2/LCK/FCER1G/HCST/PRF1/LAT/TNF/NCR2/PIK3R5/TYROBP/CD48/RAC3/ICAM1/RAET1G	STAD
KEGG_JAK_STAT_SIGNALING_PATHWAY	KEGG_JAK_STAT_SIGNALING_PATHWAY	155	0.672394	1.23231	0.019802	0.365237	0.361299	3489	tags=26%, list=18%, signal=22%	IFNA10/IFNA17/IFNA16/CSH1/IFNA7/IFNA14/IFNA6/IFNA2/IFNA13/IFNA4/IFNA8/IFNL2/IL3/IFNA21/GH2/IFNL3/IFNL1/IL9/LEP/IFNA5/EPO/IFNB1/IL21/IFNG/IL22RA2/IFNK/IL12RB2/IL5RA/IFNA1/IL13/IL21R/GH1/IL26/IL2RA/IFNW1/PRL/CSF2RA/IL9R/IL10/STAT4/IL2	STAD
KEGG_CYTOKINE_CYTOKINE_RECEPTOR_INTERACTION	KEGG_CYTOKINE_CYTOKINE_RECEPTOR_INTERACTION	263	0.624435	1.13557	0.029703	0.493069	0.487754	4561	tags=43%, list=23%, signal=33%	IFNA10/IFNA17/IFNA16/IFNA7/IFNA14/IFNA6/IFNA2/IFNA13/IFNA4/IFNA8/IL25/IFNL2/IL3/IFNA21/GH2/IFNL3/CCL1/IFNL1/IL9/LEP/AMHR2/IFNA5/EPO/CCL7/CCL16/IFNB1/IL21/IFNG/CCL27/IL22RA2/CCL25/IFNK/CD70/TNFSF9/CXCL11/CCL26/INHBC/CCR8/TNFSF4/CCL8/TNFSF18/GDF5/CCL13/PPBP/TNFRSF9/CXCL10/CCL23/CCL17/IL12RB2/EDA2R/CCL3/IL5RA/XCL2/IFNA1/IL13/CCL18/CXCL9/CCR2/IL21R/INHBE/GH1/FASLG/IL26/IL2RA/INHBA/IFNW1/CCL4/PRL/TNFS…	STAD
KEGG_GLYCOLYSIS_GLUCONEOGENESIS	KEGG_GLYCOLYSIS_GLUCONEOGENESIS	61	0.734444	1.53659	0.0125	0.497297	0.497297	1440	tags=20%, list=7%, signal=18%	ADH4/PGK2/PKLR/PDHA2/ALDH3B2/PCK1/ALDOB/ADH1C/ADH1B/LDHAL6B/FBP2/ADH6	TGCT
KEGG_ARACHIDONIC_ACID_METABOLISM	KEGG_ARACHIDONIC_ACID_METABOLISM	58	0.722173	1.49424	0.0126582	0.497297	0.497297	3545	tags=55%, list=18%, signal=45%	CYP2C19/GGT6/PLA2G2F/CYP2C9/PLA2G4E/CYP4F3/CYP2C18/CYP2J2/CYP4F2/PTGS2/CYP2B6/AKR1C3/PLA2G2E/PLA2G5/PTGS1/PLA2G2A/CYP4A22/CYP4A11/PLA2G2C/PLA2G4A/ALOX12B/CYP2C8/PTGIS/HPGDS/ALOX15B/PTGES/PTGDS/EPHX2/GGT5/LTC4S/GPX5/ALOX5	TGCT
KEGG_METABOLISM_OF_XENOBIOTICS_BY_CYTOCHROME_P450	KEGG_METABOLISM_OF_XENOBIOTICS_BY_CYTOCHROME_P450	68	0.73139	1.48801	0.0135135	0.497297	0.497297	1767	tags=44%, list=9%, signal=40%	UGT1A1/CYP2C19/ADH4/UGT2B7/UGT2A3/UGT2B17/ALDH3B2/CYP3A4/UGT1A8/GSTA5/CYP2C9/UGT1A6/UGT2B10/ADH1C/CYP2C18/CYP3A5/ADH1B/UGT2B15/UGT1A7/AKR1C4/CYP1A2/AKR1C1/CYP2B6/AKR1C3/UGT1A10/AKR1C2/ADH6/CYP3A43/UGT1A9/CYP1A1	TGCT
KEGG_STEROID_HORMONE_BIOSYNTHESIS	KEGG_STEROID_HORMONE_BIOSYNTHESIS	55	0.70769	1.46749	0.0125	0.497297	0.497297	1767	tags=47%, list=9%, signal=43%	UGT1A1/CYP11B2/UGT2B7/CYP11B1/UGT2A3/UGT2B17/CYP3A4/UGT1A8/UGT1A6/HSD17B2/UGT2B10/SULT2B1/HSD3B1/CYP3A5/UGT2B15/UGT1A7/AKR1C4/AKR1C1/AKR1C3/CYP7A1/UGT1A10/AKR1C2/CYP3A43/SULT1E1/UGT1A9/CYP1A1	TGCT
KEGG_DRUG_METABOLISM_CYTOCHROME_P450	KEGG_DRUG_METABOLISM_CYTOCHROME_P450	70	0.697271	1.4345	0.0133333	0.497297	0.497297	2491	tags=47%, list=13%, signal=41%	UGT1A1/CYP2C19/ADH4/UGT2B7/UGT2A3/UGT2B17/ALDH3B2/CYP3A4/UGT1A8/GSTA5/CYP2C9/UGT1A6/UGT2B10/ADH1C/CYP2C18/CYP3A5/ADH1B/UGT2B15/UGT1A7/CYP1A2/CYP2B6/UGT1A10/ADH6/FMO3/CYP3A43/UGT1A9/MAOA/ALDH3A1/FMO2/CYP3A7/CYP2A7/GSTA1/CYP2C8	TGCT
KEGG_LINOLEIC_ACID_METABOLISM	KEGG_LINOLEIC_ACID_METABOLISM	29	0.809268	1.56247	0.025641	0.786325	0.786325	2491	tags=62%, list=13%, signal=54%	CYP2C19/CYP3A4/PLA2G2F/CYP2C9/PLA2G4E/CYP2C18/CYP2J2/CYP3A5/AKR1B10/CYP1A2/PLA2G2E/PLA2G5/CYP3A43/PLA2G2A/PLA2G2C/CYP3A7/PLA2G4A/CYP2C8	TGCT
KEGG_GLYCOSAMINOGLYCAN_BIOSYNTHESIS_HEPARAN_SULFATE	KEGG_GLYCOSAMINOGLYCAN_BIOSYNTHESIS_HEPARAN_SULFATE	26	-0.725797	-1.63951	0.0384615	1	1	1397	tags=31%, list=7%, signal=29%	NDST3/HS3ST3A1/HS3ST3B1/HS3ST5/HS6ST2/B3GAT1/HS6ST3/NDST4	TGCT
KEGG_CHEMOKINE_SIGNALING_PATHWAY	KEGG_CHEMOKINE_SIGNALING_PATHWAY	187	0.64129	2.00536	0.016129	0.179337	0.160049	2917	tags=34%, list=15%, signal=29%	CCR9/GNGT1/CXCL5/CCL11/CXCL6/CCL24/PPBP/CCL17/CCL20/CCL1/CCL7/CCL22/CXCL1/ADCY8/CCR8/CCL13/GNG8/CCL23/CCR6/CCL19/CCR4/CXCL3/CXCL14/CXCR5/CXCL13/CXCR2/ADCY7/XCR1/CXCL8/CXCL2/JAK3/CCL18/CCR7/CCL15/ITK/HCK/CCL26/CCR2/VAV1/DOCK2/CXCL11/CCL21/RAC2/NCF1/PIK3R5/CCR1/CCR5/CCR3/CXCL10/CXCL9/WAS/CXCR6/CXCR3/CCL2/XCL1/PLCB2/TIAM1/PIK3CD/PF4V1/FGR/XCL2/CCL4/CXCR1/PIK3CG	THCA
KEGG_CYTOKINE_CYTOKINE_RECEPTOR_INTERACTION	KEGG_CYTOKINE_CYTOKINE_RECEPTOR_INTERACTION	263	0.591824	1.95394	0.0163934	0.179337	0.160049	2996	tags=51%, list=15%, signal=44%	CCR9/IL22RA2/TNFSF11/CXCL5/CCL11/CXCL6/CD70/IL9/IFNA4/CCL24/PPBP/TNFSF18/CCL17/CCL20/EDAR/CSF2/CCL1/CCL7/CCL22/CXCL1/TNFSF9/CCR8/CCL13/IL11/CRLF2/CCL23/CCR6/IL1R2/INHBA/CCL19/BMPR1B/CCR4/PDGFRA/TNFRSF9/CXCL3/LTA/CXCL14/IL12B/IFNL3/IL2RA/FLT3/TNFRSF18/TNFSF4/PRLR/CXCR5/IL18R1/LTB/IL6/TNF/CXCL13/CXCR2/XCR1/IL1A/TNFRSF13B/IL23R/TNFSF14/CXCL8/IL7R/CSF3/IL10/IL17A/CXCL2/IFNA8/IL26/OSM/CCL18/IL21/CSF2R…	THCA
KEGG_TYPE_I_DIABETES_MELLITUS	KEGG_TYPE_I_DIABETES_MELLITUS	41	0.742226	1.91534	0.0169492	0.179337	0.160049	3890	tags=73%, list=20%, signal=59%	PTPRN/INS/CD80/LTA/IL12B/TNF/IL1A/HLA-G/CD28/HLA-DOB/IL2/CD86/IFNG/HLA-DOA/HLA-DQA2/HLA-DQA1/IL1B/GZMB/FASLG/HLA-DPA1/HLA-DQB1/FAS/HLA-DRB5/HLA-DPB1/HLA-F/HLA-DMA/IL12A/HLA-DRA/HLA-DRB1/GAD2	THCA
KEGG_LEISHMANIA_INFECTION	KEGG_LEISHMANIA_INFECTION	69	0.692188	1.90437	0.0166667	0.179337	0.160049	4110	tags=54%, list=21%, signal=43%	CR1/IL12B/TNF/IL1A/PTGS2/IL10/HLA-DOB/NCF2/FCGR1A/IFNG/ITGAM/HLA-DOA/HLA-DQA2/NCF4/C3/ITGA4/FCGR2A/NCF1/ITGB2/HLA-DQA1/TGFB3/IL1B/HLA-DPA1/HLA-DQB1/FCGR3A/TGFB2/HLA-DRB5/HLA-DPB1/HLA-DMA/STAT1/FCGR3B/IL12A/HLA-DRA/HLA-DRB1/MYD88/NOS2/TLR2	THCA
KEGG_CELL_ADHESION_MOLECULES_CAMS	KEGG_CELL_ADHESION_MOLECULES_CAMS	131	0.633971	1.88451	0.0175439	0.179337	0.160049	3889	tags=58%, list=20%, signal=47%	CLDN10/CNTN1/VCAN/CD80/CLDN19/NRXN1/CDH15/CTLA4/ICOS/NCAM2/CLDN14/HLA-G/CD28/CLDN11/L1CAM/SPN/ICAM3/CLDN17/HLA-DOB/ITGB8/CD86/CD40LG/NLGN4X/ITGAM/HLA-DOA/PDCD1LG2/HLA-DQA2/CLDN6/CLDN2/ITGB7/ITGA4/CLDN16/VCAM1/CD2/PTPRC/ITGB2/HLA-DQA1/CD8B/CADM3/CDH3/SELL/ICOSLG/NECTIN1/ITGAL/CLDN9/SELPLG/ICAM1/SIGLEC1/CD22/CDH4/CD274/SELP/NLGN3/CD226/CD6/HLA-DPA1/PDCD1/MAG/NRXN3/HLA-DQB1/CLDN1/CD4/CNTNAP1/HLA-DRB…	THCA
KEGG_NOD_LIKE_RECEPTOR_SIGNALING_PATHWAY	KEGG_NOD_LIKE_RECEPTOR_SIGNALING_PATHWAY	62	0.699132	1.88284	0.0175439	0.179337	0.160049	3586	tags=42%, list=18%, signal=34%	CARD18/CCL11/CCL7/CXCL1/CCL13/NOD2/IL6/TNF/BIRC3/CXCL8/CARD9/CXCL2/CASP5/PSTPIP1/IL18/NLRP3/CCL2/NOD1/NLRC4/IL1B/MEFV/CASP1/PYCARD/CCL8/TNFAIP3/CCL5	THCA
KEGG_INTESTINAL_IMMUNE_NETWORK_FOR_IGA_PRODUCTION	KEGG_INTESTINAL_IMMUNE_NETWORK_FOR_IGA_PRODUCTION	46	0.701248	1.84375	0.0181818	0.179337	0.160049	4252	tags=76%, list=22%, signal=60%	CCR9/CD80/ICOS/IL6/TNFRSF13B/CD28/AICDA/IL10/HLA-DOB/IL2/CD86/TNFRSF17/CD40LG/HLA-DOA/HLA-DQA2/ITGB7/ITGA4/TNFRSF13C/TNFSF13B/HLA-DQA1/ICOSLG/HLA-DPA1/HLA-DQB1/MAP3K14/HLA-DRB5/PIGR/HLA-DPB1/HLA-DMA/CD40/HLA-DRA/IL15RA/HLA-DRB1/CXCL12/CCR10/CXCR4	THCA
KEGG_GRAFT_VERSUS_HOST_DISEASE	KEGG_GRAFT_VERSUS_HOST_DISEASE	37	0.729982	1.81346	0.0169492	0.179337	0.160049	4096	tags=76%, list=21%, signal=60%	CD80/IL6/TNF/IL1A/HLA-G/CD28/HLA-DOB/IL2/CD86/IFNG/HLA-DOA/HLA-DQA2/HLA-DQA1/KLRC1/KIR3DL2/IL1B/GZMB/FASLG/HLA-DPA1/HLA-DQB1/FAS/HLA-DRB5/HLA-DPB1/HLA-F/HLA-DMA/HLA-DRA/HLA-DRB1/KIR3DL1	THCA
KEGG_ALLOGRAFT_REJECTION	KEGG_ALLOGRAFT_REJECTION	35	0.756608	1.81285	0.0178571	0.179337	0.160049	3889	tags=77%, list=20%, signal=62%	CD80/IL12B/TNF/HLA-G/CD28/IL10/HLA-DOB/IL2/CD86/CD40LG/IFNG/HLA-DOA/HLA-DQA2/HLA-DQA1/GZMB/FASLG/HLA-DPA1/HLA-DQB1/FAS/HLA-DRB5/HLA-DPB1/HLA-F/HLA-DMA/CD40/IL12A/HLA-DRA/HLA-DRB1	THCA
KEGG_SYSTEMIC_LUPUS_ERYTHEMATOSUS	KEGG_SYSTEMIC_LUPUS_ERYTHEMATOSUS	54	0.6603	1.75231	0.0172414	0.179337	0.160049	4034	tags=74%, list=21%, signal=59%	ELANE/CD80/C6/C7/TNF/CD28/IL10/C2/FCGR2B/CTSG/C1S/HLA-DOB/CD86/FCGR1A/CD40LG/IFNG/GRIN2A/HLA-DOA/HLA-DQA2/C3/C1R/FCGR2A/HLA-DQA1/HLA-DPA1/C4A/HLA-DQB1/C4B/FCGR3A/HLA-DRB5/C1QB/HLA-DPB1/C1QA/C1QC/HLA-DMA/ACTN1/FCGR3B/CD40/HLA-DRA/HLA-DRB1/ACTN3	THCA
KEGG_ASTHMA	KEGG_ASTHMA	28	0.759281	1.73832	0.0185185	0.179337	0.160049	3889	tags=86%, list=20%, signal=69%	CCL11/IL9/MS4A2/FCER1A/TNF/RNASE3/IL10/HLA-DOB/IL3/CD40LG/HLA-DOA/HLA-DQA2/HLA-DQA1/IL13/FCER1G/HLA-DPA1/HLA-DQB1/HLA-DRB5/HLA-DPB1/PRG2/HLA-DMA/CD40/HLA-DRA/HLA-DRB1	THCA
KEGG_NON_HOMOLOGOUS_END_JOINING	KEGG_NON_HOMOLOGOUS_END_JOINING	13	-0.820762	-1.6996	0.0178571	0.179337	0.160049	120	tags=15%, list=1%, signal=15%	POLL/DNTT	THCA
KEGG_HEMATOPOIETIC_CELL_LINEAGE	KEGG_HEMATOPOIETIC_CELL_LINEAGE	85	0.615334	1.69669	0.0175439	0.179337	0.160049	2866	tags=52%, list=15%, signal=44%	CD1B/CD1A/CD1E/MME/CSF2/CD1C/IL11/IL1R2/CR1/IL2RA/FLT3/IL6/TNF/FCER2/IL1A/CD19/IL7R/CSF3/CSF2RA/CD5/IL3/CD33/CR2/ANPEP/FCGR1A/ITGA2/ITGAM/CD3G/ITGA4/CD3D/CD7/CD37/CD2/MS4A1/CD3E/THPO/CD8B/IL7/IL1B/CD55/CD22/CSF1R/IL6R/CSF1	THCA
KEGG_T_CELL_RECEPTOR_SIGNALING_PATHWAY	KEGG_T_CELL_RECEPTOR_SIGNALING_PATHWAY	108	0.544635	1.56566	0.0175439	0.179337	0.160049	3454	tags=28%, list=18%, signal=23%	CSF2/CARD11/CTLA4/ICOS/TNF/CD28/IL10/RASGRP1/IL2/ITK/CD40LG/IFNG/VAV1/CD3G/CD3D/PIK3R5/CD3E/PTPRC/CD8B/GRAP2/CD247/ZAP70/LCK/PIK3CD/PIK3CG/PDCD1/CD4/LCP2/MAP3K14/NFKBIE	THCA
KEGG_COMPLEMENT_AND_COAGULATION_CASCADES	KEGG_COMPLEMENT_AND_COAGULATION_CASCADES	69	0.566714	1.55916	0.0166667	0.179337	0.160049	3624	tags=54%, list=18%, signal=44%	F9/FGA/MBL2/F5/PLG/CR1/FGG/C6/FGB/C7/CFB/PLAUR/PROC/C2/SERPINF2/C1S/CR2/CFH/C3/C1R/PLAU/SERPINA1/CFI/C5AR1/C3AR1/CD55/F13A1/PROS1/C4A/C4B/SERPINA5/SERPINC1/C1QB/C1QA/SERPING1/SERPINE1/C1QC	THCA
KEGG_NATURAL_KILLER_CELL_MEDIATED_CYTOTOXICITY	KEGG_NATURAL_KILLER_CELL_MEDIATED_CYTOTOXICITY	131	0.464028	1.37935	0.0175439	0.179337	0.160049	3249	tags=38%, list=17%, signal=32%	IFNA4/CSF2/PRKCG/RAET1L/RAET1E/TNF/HLA-G/IFNA8/KLRC2/KLRC3/NCR3/SH2D1A/IFNA1/IFNA16/IFNG/VAV1/RAET1G/RAC2/PIK3R5/ITGB2/MICB/KLRC1/CD48/KIR3DL2/CD247/ZAP70/LCK/ITGAL/IFNA13/PIK3CD/NCR1/ICAM1/GZMB/HCST/IFNA5/FASLG/CD244/ULBP2/IFNAR2/FCER1G/SH3BP2/PIK3CG/TNFRSF10A/BID/SHC4/FAS/KLRK1/TYROBP/FCGR3A/LCP2	THCA
KEGG_LEUKOCYTE_TRANSENDOTHELIAL_MIGRATION	KEGG_LEUKOCYTE_TRANSENDOTHELIAL_MIGRATION	116	0.4631	1.36302	0.0178571	0.179337	0.160049	3231	tags=28%, list=16%, signal=24%	CLDN10/PRKCG/CLDN19/CLDN14/MYL10/CLDN11/RHOH/CLDN17/NCF2/ITK/VAV1/ITGAM/CLDN6/CLDN2/NCF4/ITGA4/CLDN16/MYLPF/VCAM1/RAC2/NCF1/PIK3R5/MMP9/ITGB2/CYBB/ITGAL/PIK3CD/CLDN9/ICAM1/TXK/PIK3CG/CLDN1/MMP2	THCA
KEGG_MELANOGENESIS	KEGG_MELANOGENESIS	101	0.470921	1.35181	0.0178571	0.179337	0.160049	1429	tags=15%, list=7%, signal=14%	CALML3/WNT7A/WNT2/CALML5/TYRP1/WNT10A/ADCY8/PRKCG/TYR/WNT9B/FZD10/ADCY7/WNT16/CREB3L3/WNT6	THCA
KEGG_FOCAL_ADHESION	KEGG_FOCAL_ADHESION	199	0.417077	1.31146	0.0169492	0.179337	0.160049	2763	tags=22%, list=14%, signal=19%	COL11A1/IBSP/COMP/PRKCG/TNR/RASGRF1/PDGFRA/THBS2/ITGA11/LAMA3/BIRC3/MYL10/COL5A1/ITGB8/LAMB3/COL1A1/ITGA2/TNC/VAV1/COL6A3/ITGB7/PARVG/ITGA4/IGF1/FN1/MYLPF/RELN/RAC2/LAMA2/PIK3R5/ITGB4/FLNC/COL3A1/HGF/ITGB6/SPP1/COL2A1/THBS1/PIK3CD/COL1A2/COL5A2/LAMA1/TNXB	THCA
KEGG_OLFACTORY_TRANSDUCTION	KEGG_OLFACTORY_TRANSDUCTION	359	-0.578094	-1.95974	0.0222222	0.204444	0.182456	1462	tags=39%, list=7%, signal=37%	OR2H1/OR14J1/OR52H1/OR1N1/OR2M5/OR56A5/OR2A1/OR5T2/OR1E1/OR52I2/OR10C1/OR1C1/PRKG1/OR5D14/OR2L2/OR3A3/OR2A42/OR1K1/OR6C2/OR2W3/OR11A1/OR6C75/OR2AT4/OR6N2/OR1J1/OR1L1/OR4K17/OR2Y1/OR10H2/OR6C4/OR13F1/OR8B12/OR1J2/OR2L13/OR1J4/OR2J2/OR9Q1/OR5AC2/OR4K1/OR51A7/OR2G6/OR2L3/OR52L1/OR4N2/OR6T1/OR2C3/OR1M1/OR2T3/OR9K2/OR5K1/OR7C2/OR10K2/OR2B3/OR1A2/OR4D2/OR4N5/OR2T8/OR4F6/OR6C6/OR8G1/OR2A4/OR2F2/OR2T12/O…	THCA
KEGG_VIRAL_MYOCARDITIS	KEGG_VIRAL_MYOCARDITIS	68	0.522617	1.44074	0.0327869	0.252747	0.225564	4488	tags=51%, list=23%, signal=40%	MYH4/MYH8/MYH13/CD80/HLA-G/CD28/HLA-DOB/CD86/CD40LG/HLA-DOA/HLA-DQA2/RAC2/LAMA2/ITGB2/HLA-DQA1/DMD/ITGAL/ICAM1/CD55/BID/HLA-DPA1/HLA-DQB1/HLA-DRB5/HLA-DPB1/HLA-F/HLA-DMA/CD40/HLA-DRA/HLA-DRB1/MYH10/CAV1/ABL2/FYN/PRF1/SGCA	THCA
KEGG_ECM_RECEPTOR_INTERACTION	KEGG_ECM_RECEPTOR_INTERACTION	84	0.492778	1.35959	0.0344828	0.252747	0.225564	2785	tags=36%, list=14%, signal=31%	COL11A1/IBSP/COMP/TNR/THBS2/ITGA11/LAMA3/COL5A1/ITGB8/LAMB3/COL1A1/ITGA2/TNC/COL6A3/ITGB7/ITGA4/FN1/RELN/LAMA2/ITGB4/COL3A1/ITGB6/SPP1/COL2A1/THBS1/COL1A2/COL5A2/LAMA1/TNXB/SV2B	THCA
KEGG_JAK_STAT_SIGNALING_PATHWAY	KEGG_JAK_STAT_SIGNALING_PATHWAY	155	0.448254	1.35526	0.0333333	0.252747	0.225564	4048	tags=44%, list=21%, signal=35%	IL22RA2/IL9/IFNA4/CSF2/IL11/CRLF2/IL12B/IFNL3/IL2RA/PRLR/IL6/IL23R/IL7R/CSF3/IL10/STAT4/JAK3/IFNA8/IL26/OSM/IL21/CSF2RA/IL21R/IL3/CSF2RB/IFNL1/IL2/IL23A/IFNA1/IFNE/IFNA16/IFNG/IL2RG/IL12RB1/PIK3R5/LIF/IL13/OSMR/IL2RB/LEP/IL7/IL24/IFNA13/PIK3CD/IFNA5/IFNL2/IFNAR2/IL6R/PIK3CG/IL22/IL13RA2/PIM1/IL10RA/IRF9/LEPR/CSF3R/CLCF1/MYC/IL4R/STAT1/IL12A/CBLC/IL15RA/CNTF/BCL2L1/IL5RA/CTF1/GH1	THCA
KEGG_WNT_SIGNALING_PATHWAY	KEGG_WNT_SIGNALING_PATHWAY	150	0.437539	1.32339	0.0338983	0.252747	0.225564	2507	tags=15%, list=13%, signal=13%	WNT7A/WNT2/WNT10A/MMP7/SFRP2/DKK4/NKD2/PRKCG/SFRP4/SFRP5/WNT9B/FZD10/NKD1/WNT16/FOSL1/WNT6/RAC2/WNT5B/PRICKLE1/CAMK2A/PLCB2/DKK2/TCF7	THCA
KEGG_FC_GAMMA_R_MEDIATED_PHAGOCYTOSIS	KEGG_FC_GAMMA_R_MEDIATED_PHAGOCYTOSIS	95	0.46415	1.31616	0.0357143	0.252747	0.225564	2917	tags=24%, list=15%, signal=21%	PRKCG/AMPH/FCGR2B/HCK/FCGR1A/VAV1/DOCK2/DNM1/PLA2G4A/FCGR2A/RAC2/NCF1/PIK3R5/PTPRC/PLA2G4D/WAS/INPP5D/PLPP2/PIK3CD/DNM3/SPHK1/WASF1/PIK3CG	THCA
KEGG_LYSOSOME	KEGG_LYSOSOME	121	0.437469	1.29109	0.0350877	0.252747	0.225564	6529	tags=40%, list=33%, signal=27%	PSAPL1/NAPSA/CTSE/CTSG/CD68/DNASE2B/ACP5/SLC11A1/CTSK/CTSC/ATP6V0D2/CTSW/LAPTM5/CTSH/CTSV/NPC1/CTSS/LAMP3/TCIRG1/MAN2B1/IDS/LIPA/CTSF/GGA3/SLC17A5/CTSA/ARSB/NPC2/FUCA1/IGF2R/NAGA/AP3S1/GM2A/CTSD/AP1S2/NAGPA/HGSNAT/MCOLN1/ATP6V0A2/AGA/ABCB9/PPT1/AP4M1/AP1S1/HEXB/ACP2/PLA2G15/SCARB2/ARSA	THCA
KEGG_TASTE_TRANSDUCTION	KEGG_TASTE_TRANSDUCTION	51	-0.5352	-1.41928	0.0444444	0.302881	0.270305	3513	tags=59%, list=18%, signal=48%	TAS2R5/GNAS/TAS2R13/TAS2R19/TAS2R1/TAS2R46/TAS2R4/CACNA1A/TAS2R14/TAS2R43/TAS2R16/TAS2R3/PRKACG/TAS2R50/TAS2R31/PRKACB/TAS2R10/TAS2R7/ASIC2/TAS2R42/TAS2R39/TAS2R9/CACNA1B/TRPM5/KCNB1/TAS2R8/TAS2R41/TAS1R1/TAS1R2/GNAT3	THCA
KEGG_CALCIUM_SIGNALING_PATHWAY	KEGG_CALCIUM_SIGNALING_PATHWAY	177	0.392183	1.22712	0.046875	0.308036	0.274906	2784	tags=27%, list=14%, signal=23%	CALML3/CALML5/DRD5/GRM5/ADRB3/CACNA1E/HTR4/ADCY8/CACNA1G/NTSR1/PRKCG/P2RX2/PDGFRA/PTGFR/SLC8A3/GNA15/HTR7/PTGER1/CCKAR/ADCY7/HTR2A/HRH1/P2RX5/TRHR/P2RX1/CYSLTR2/HTR6/GRIN2A/SLC8A2/RYR1/HTR2B/PTAFR/OXTR/ADORA2B/ERBB3/TNNC2/CAMK2A/PLCB2/ADRB2/P2RX6/PLCD3/SLC8A1/CCKBR/BST1/SPHK1/TACR1/CAMK4	THCA
KEGG_RETINOL_METABOLISM	KEGG_RETINOL_METABOLISM	64	0.722835	1.52006	0.0106383	0.209091	0.202153	3697	tags=61%, list=19%, signal=50%	UGT2A1/ADH1A/UGT1A6/CYP2A13/UGT1A3/CYP2A7/CYP2C19/ADH7/ADH1C/CYP26C1/UGT2B11/CYP2C18/UGT2A3/CYP2A6/CYP2B6/RDH8/CYP2C9/ADH4/UGT1A7/ADH6/UGT1A1/CYP26A1/CYP1A2/UGT1A10/RPE65/CYP3A43/AWAT2/CYP4A22/DHRS9/CYP4A11/UGT2B17/RDH5/LRAT/UGT1A8/CYP3A5/UGT2B15/ADH1B/RDH12/UGT1A5	THYM
KEGG_REGULATION_OF_AUTOPHAGY	KEGG_REGULATION_OF_AUTOPHAGY	35	0.763762	1.5163	0.0113636	0.209091	0.202153	1121	tags=20%, list=6%, signal=19%	IFNA13/IFNA7/IFNA16/IFNA10/IFNA6/IFNA2/IFNA14	THYM
KEGG_TASTE_TRANSDUCTION	KEGG_TASTE_TRANSDUCTION	51	0.732787	1.50593	0.010989	0.209091	0.202153	1815	tags=49%, list=9%, signal=45%	TAS1R2/TAS2R41/GNAT3/TAS2R13/TAS2R1/TAS2R7/TAS2R60/TAS2R9/TAS1R1/TAS2R42/TAS2R10/PRKACG/TAS2R8/TRPM5/TAS2R40/GNB3/TAS2R43/ASIC2/TAS1R3/TAS2R46/KCNB1/TAS2R38/TAS2R31/TAS2R3/SCNN1A	THYM
KEGG_METABOLISM_OF_XENOBIOTICS_BY_CYTOCHROME_P450	KEGG_METABOLISM_OF_XENOBIOTICS_BY_CYTOCHROME_P450	68	0.697668	1.47042	0.0105263	0.209091	0.202153	3438	tags=49%, list=18%, signal=40%	GSTA5/UGT2A1/ADH1A/UGT1A6/UGT1A3/CYP2C19/ADH7/ADH1C/UGT2B11/CYP2C18/GSTA1/UGT2A3/CYP2B6/CYP2C9/ADH4/UGT1A7/GSTA2/MGST1/ADH6/UGT1A1/CYP1A2/UGT1A10/AKR1C2/CYP3A43/CYP2F1/AKR1C1/UGT2B17/ALDH1A3/UGT1A8/CYP3A5/GSTO2/UGT2B15/ADH1B	THYM
KEGG_CYTOSOLIC_DNA_SENSING_PATHWAY	KEGG_CYTOSOLIC_DNA_SENSING_PATHWAY	54	0.716618	1.46991	0.010989	0.209091	0.202153	1121	tags=15%, list=6%, signal=14%	IFNA13/IFNA7/IFNA16/IFNA10/IFNA6/IFNA2/IL6/IFNA14	THYM
KEGG_DRUG_METABOLISM_CYTOCHROME_P450	KEGG_DRUG_METABOLISM_CYTOCHROME_P450	70	0.693311	1.46051	0.0105263	0.209091	0.202153	3697	tags=51%, list=19%, signal=42%	GSTA5/UGT2A1/ADH1A/UGT1A6/CYP2A13/UGT1A3/CYP2A7/CYP2C19/ADH7/ADH1C/UGT2B11/CYP2C18/GSTA1/UGT2A3/CYP2A6/CYP2B6/CYP2C9/ADH4/UGT1A7/GSTA2/MGST1/ADH6/UGT1A1/CYP1A2/UGT1A10/CYP3A43/UGT2B17/ALDH1A3/FMO2/UGT1A8/CYP3A5/GSTO2/UGT2B15/ADH1B/FMO5/UGT1A5	THYM
KEGG_AUTOIMMUNE_THYROID_DISEASE	KEGG_AUTOIMMUNE_THYROID_DISEASE	50	0.7043	1.44946	0.0111111	0.209091	0.202153	2133	tags=22%, list=11%, signal=20%	IFNA13/IFNA7/IFNA16/IFNA10/CGA/IFNA6/IFNA2/IFNA14/TPO/IL2/IL5	THYM
KEGG_ANTIGEN_PROCESSING_AND_PRESENTATION	KEGG_ANTIGEN_PROCESSING_AND_PRESENTATION	80	0.662074	1.43707	0.0104167	0.209091	0.202153	1121	tags=9%, list=6%, signal=8%	IFNA13/IFNA7/IFNA16/IFNA10/IFNA6/IFNA2/IFNA14	THYM
KEGG_RIG_I_LIKE_RECEPTOR_SIGNALING_PATHWAY	KEGG_RIG_I_LIKE_RECEPTOR_SIGNALING_PATHWAY	70	0.681264	1.43513	0.0105263	0.209091	0.202153	1428	tags=11%, list=7%, signal=11%	IFNA13/IFNA7/IFNA16/IFNA10/IFNA6/IFNA2/IFNA14/IL12A	THYM
KEGG_NEUROACTIVE_LIGAND_RECEPTOR_INTERACTION	KEGG_NEUROACTIVE_LIGAND_RECEPTOR_INTERACTION	271	0.573846	1.31496	0.01	0.209091	0.202153	4173	tags=48%, list=21%, signal=38%	RXFP2/TAAR9/MC3R/FSHR/GRIA4/GPR50/CGA/TACR3/FSHB/CCKBR/GRIA1/PTGFR/GABRG1/GALR1/GHRHR/NTSR2/TAAR1/CHRNB2/CHRM1/HTR1A/HTR1D/GABRQ/NPY4R/NPY2R/DRD5/SSTR5/GH2/HTR6/CHRM2/LEP/ADRA1A/CNR1/GABRP/KISS1R/GRM7/P2RY4/PRLR/NPY5R/GRIA2/GABRA3/SSTR1/GABRG2/HTR1B/ADRA1D/GLP1R/GRID1/DRD2/NPFFR1/CSH1/SSTR4/P2RY2/DRD3/GRIA3/HTR2C/SCTR/GRM1/GRM8/P2RX3/GABBR2/CHRNA6/CHRNA7/CHRNG/CRHR1/NPBWR2/NMBR/AGTR1/GABRE/GRIK1/…	THYM
KEGG_PORPHYRIN_AND_CHLOROPHYLL_METABOLISM	KEGG_PORPHYRIN_AND_CHLOROPHYLL_METABOLISM	40	0.718434	1.46073	0.0217391	0.333333	0.322273	1740	tags=28%, list=9%, signal=25%	FTMT/UGT2A1/UGT1A6/UGT1A3/UGT2B11/UGT2A3/ALAS2/UGT1A7/UGT1A1/UGT1A10/CP	THYM
KEGG_JAK_STAT_SIGNALING_PATHWAY	KEGG_JAK_STAT_SIGNALING_PATHWAY	155	0.572058	1.28625	0.0204082	0.333333	0.322273	2949	tags=24%, list=15%, signal=20%	IFNA13/IFNA7/IFNA16/IFNA10/IFNA6/IFNA2/IL9/IFNL3/CSF3/GH2/LEP/IFNL2/IL22RA1/IL6/PRLR/IFNA14/CLCF1/CSF2/CSH1/IL12A/TPO/IL21/IL20/LIF/IL2/IL12RB2/IL22RA2/IFNE/IL5/IFNLR1/CBLC/IL26/IL23R/IL22/IL5RA/SPRY4/GHR	THYM
KEGG_HYPERTROPHIC_CARDIOMYOPATHY_HCM	KEGG_HYPERTROPHIC_CARDIOMYOPATHY_HCM	83	0.609957	1.32434	0.0416667	0.553383	0.535022	5559	tags=59%, list=28%, signal=42%	CACNG6/ACTC1/CACNG7/IL6/CACNA1D/TNNT2/TNNI3/ITGA8/SGCD/ITGB3/ITGB8/MYL2/DES/TGFB2/CACNG3/CACNG4/SGCG/ITGB6/LAMA2/CACNA1S/MYH7/PRKAG3/CACNG2/CACNG8/ACE/ITGA2B/ITGA2/DMD/MYBPC3/RYR2/TNF/ITGA11/CACNB4/ITGA1/CACNA2D3/ITGB4/CACNG1/ITGA10/TPM1/PRKAA2/SLC8A1/MYH6/ITGA3/CACNA2D2/ITGB1/IGF1/TTN/ITGB7/TNNC1	THYM
KEGG_DILATED_CARDIOMYOPATHY	KEGG_DILATED_CARDIOMYOPATHY	90	0.596422	1.29352	0.0421053	0.553383	0.535022	5572	tags=59%, list=28%, signal=42%	CACNG6/ACTC1/PRKACG/CACNG7/CACNA1D/TNNT2/TNNI3/ITGA8/SGCD/ITGB3/ITGB8/MYL2/DES/TGFB2/CACNG3/CACNG4/SGCG/ITGB6/LAMA2/CACNA1S/MYH7/ADCY5/CACNG2/CACNG8/ITGA2B/ITGA2/DMD/MYBPC3/RYR2/TNF/ITGA11/PLN/CACNB4/ITGA1/ADCY6/CACNA2D3/ADCY4/ITGB4/CACNG1/ITGA10/ADCY9/ADCY1/TPM1/SLC8A1/MYH6/ITGA3/CACNA2D2/ITGB1/IGF1/TTN/ITGB7/TNNC1/ADCY2	THYM
KEGG_OLFACTORY_TRANSDUCTION	KEGG_OLFACTORY_TRANSDUCTION	359	0.515484	1.19676	0.049505	0.569659	0.550758	1489	tags=31%, list=8%, signal=30%	OR52E4/OR52K2/OR2M2/OR2T12/OR5AN1/OR2M5/OR5D18/OR13C8/OR10H5/OR6C74/OR51T1/OR52K1/OR5AK2/OR8D1/OR8B8/OR2G2/OR5K1/OR10H2/OR2F2/OR4C12/OR4K1/OR10A7/OR2Y1/OR8I2/OR4D5/OR2T34/OR7A10/OR8U1/OR7C2/OR51A4/OR6C65/OR6N1/OR4M1/OR10Z1/OR6M1/OR8K5/OR5M9/OR6C6/OR4F15/OR10S1/OR52A1/OR9Q2/OR5P2/OR9K2/OR56A4/OR2Z1/OR2A25/OR52N1/OR2M4/OR56A5/OR5C1/OR52N5/OR14A16/OR7C1/OR10H1/OR2T4/OR1L3/OR2AT4/OR6B2/OR1J4/OR1F1/OR…	THYM
KEGG_OLFACTORY_TRANSDUCTION	KEGG_OLFACTORY_TRANSDUCTION	359	0.81155	1.7275	0.00990099	0.387368	0.378947	1550	tags=60%, list=8%, signal=56%	OR10R2/OR8B4/OR11H1/OR2T27/OR4F5/OR4C11/OR8B8/OR51S1/OR8J3/OR8H1/OR52M1/OR52K1/OR10Z1/OR6Q1/OR5AK2/OR6Y1/OR51D1/OR5T1/OR4C3/OR9I1/OR4K15/OR2M7/OR4C12/OR14C36/OR13F1/OR4A15/OR7D4/OR51T1/OR14J1/OR52J3/OR2Z1/OR5B21/OR4C15/OR5V1/OR10J3/OR6K3/OR10G3/OR7G1/OR4Q3/OR10A5/OR6N2/OR9Q2/OR10V1/OR52A1/OR2G3/OR2M5/OR8H2/OR4C46/OR4K17/OR8U1/OR8J1/OR8K5/OR5B12/OR4L1/OR2G2/OR51V1/OR4D9/OR4D11/OR51L1/OR4D5/OR1D5/O…	UCEC
KEGG_ANTIGEN_PROCESSING_AND_PRESENTATION	KEGG_ANTIGEN_PROCESSING_AND_PRESENTATION	80	0.686681	1.41542	0.0105263	0.387368	0.378947	3287	tags=36%, list=17%, signal=30%	IFNA14/KIR3DL3/IFNA4/IFNA2/IFNA6/KIR3DL2/KLRC4/KLRC3/KLRD1/IFNA21/KIR3DL1/IFNA13/KIR2DL4/KLRC2/IFNA1/CD8A/LTA/IFNA10/KLRC1/CD8B/IFNA7/KIR2DL3/HLA-DQA1/IFNA16/HLA-DOA/HLA-DQA2/IFI30/CIITA/HLA-DOB	UCEC
KEGG_CYTOKINE_CYTOKINE_RECEPTOR_INTERACTION	KEGG_CYTOKINE_CYTOKINE_RECEPTOR_INTERACTION	263	0.654158	1.39604	0.00990099	0.387368	0.378947	3036	tags=42%, list=15%, signal=36%	IL21/IFNA14/IFNA4/IFNG/CCL27/IL17A/IFNA2/IFNA6/TNFRSF13B/CCL11/TNFRSF17/IFNL2/CXCL13/IFNL3/IL9R/CCR4/IL21R/CCR2/CCR8/IFNA21/CRLF2/CCL26/CSF2/IL26/FASLG/CCL1/LEP/IL12B/CXCL9/CCL19/IFNA13/CXCR5/XCR1/CXCR6/IL12RB1/IFNK/FLT3/TNFRSF9/CXCL11/INHBA/IFNL1/CXCR3/CCL7/IL22RA2/CCL24/TNFRSF8/IL18RAP/CCR7/IFNA1/AMHR2/CCL13/IL2RA/LTA/CD27/TNFSF18/TNFSF8/IFNA10/CCR3/CCL18/IL10/CCR5/TNFSF13B/CCL22/IL3/IL12RB2/CC…	UCEC
KEGG_NATURAL_KILLER_CELL_MEDIATED_CYTOTOXICITY	KEGG_NATURAL_KILLER_CELL_MEDIATED_CYTOTOXICITY	131	0.651794	1.38118	0.010101	0.387368	0.378947	2158	tags=29%, list=11%, signal=26%	IFNA14/IFNA4/IFNG/IFNA2/IFNA6/KIR3DL2/PPP3R2/KLRC3/KLRD1/SH2D1A/IFNA21/CSF2/FASLG/KIR3DL1/NCR1/KLRK1/IFNA13/CD244/KIR2DL4/PRKCB/KLRC2/IFNA1/GZMB/IFNA10/PIK3CG/RAET1L/PRF1/KLRC1/ZAP70/CD247/IFNA7/LCK/CD48/NCR3/PIK3R5/ITGAL/LCP2/KIR2DL3	UCEC
KEGG_JAK_STAT_SIGNALING_PATHWAY	KEGG_JAK_STAT_SIGNALING_PATHWAY	155	0.6378	1.36769	0.01	0.387368	0.378947	3399	tags=34%, list=17%, signal=28%	IL21/IFNA14/IFNA4/IFNG/IFNA2/IFNA6/CSH1/IFNL2/IFNL3/IL9R/IL21R/IFNA21/CRLF2/CSF2/IL26/LEP/IL12B/IFNA13/IL12RB1/IFNK/IFNL1/IL22RA2/IFNA1/IL2RA/IFNA10/IL10/PIK3CG/IL3/IL12RB2/IL7R/IL24/IFNA7/CSF2RB/PIK3R5/IL13/IL10RA/IL2RB/IL11/IL2RG/CSF2RA/STAT4/AKT3/IL5/IL23R/IFNA16/IL22RA1/IL20/JAK3/CCND2/IL15RA/OSM/GH2/IFNE	UCEC
KEGG_OTHER_GLYCAN_DEGRADATION	KEGG_OTHER_GLYCAN_DEGRADATION	16	0.892577	1.56651	0.0253165	0.512059	0.500928	85	tags=6%, list=0%, signal=6%	NEU2	UCEC
KEGG_REGULATION_OF_AUTOPHAGY	KEGG_REGULATION_OF_AUTOPHAGY	35	0.74476	1.45824	0.0224719	0.512059	0.500928	2117	tags=31%, list=11%, signal=28%	IFNA14/IFNA4/IFNG/IFNA2/IFNA6/IFNA21/IFNA13/IFNA1/IFNA10/IFNA7/INS	UCEC
KEGG_PROTEASOME	KEGG_PROTEASOME	44	0.741544	1.45016	0.021978	0.512059	0.500928	1079	tags=7%, list=5%, signal=6%	IFNG/PSMB11/PSMA8	UCEC
KEGG_TOLL_LIKE_RECEPTOR_SIGNALING_PATHWAY	KEGG_TOLL_LIKE_RECEPTOR_SIGNALING_PATHWAY	102	0.642196	1.33946	0.030303	0.512059	0.500928	3733	tags=32%, list=19%, signal=26%	IFNA14/IFNA4/IFNA2/IFNA6/TLR8/IFNA21/CD80/IL12B/CXCL9/IFNA13/CXCL11/IFNA1/IFNA10/PIK3CG/IFNA7/TLR7/PIK3R5/CCL4/CD86/TLR4/CXCL10/CCL3/CCL5/AKT3/IFNA16/CD40/LY96/CTSK/IL1B/MAPK12/PIK3CD/MAPK11/TICAM2	UCEC
KEGG_CHEMOKINE_SIGNALING_PATHWAY	KEGG_CHEMOKINE_SIGNALING_PATHWAY	187	0.619031	1.32118	0.02	0.512059	0.500928	3885	tags=37%, list=20%, signal=30%	CCL27/CCL11/CXCL13/CCR4/ITK/PRKACG/CCR2/CCR8/CCL26/CCL1/CXCL9/CCL19/CXCR5/XCR1/CXCR6/PRKCB/CXCL11/CXCR3/CCL7/CCL24/CCR7/CCL13/DOCK2/CCR3/CCL18/PIK3CG/CCR5/CCL22/CCR6/NCF1/CCL8/PIK3R5/CCL4/GNG2/PPBP/ADCY2/CCL25/GNG8/CXCL10/CCL4L2/RASGRP2/CCL17/CCL16/GNG4/GRK7/CCL3/CCL21/CCL5/XCL2/GNGT2/AKT3/CCL23/CCR1/JAK3/CCL3L3/CCR10/RAC2/HCK/FGR/WAS/GNB3/GNB4/VAV1/GNG13/CXCL12/PIK3CD/PF4/GRK5/ARRB1/PLCB2	UCEC
KEGG_T_CELL_RECEPTOR_SIGNALING_PATHWAY	KEGG_T_CELL_RECEPTOR_SIGNALING_PATHWAY	108	0.630745	1.32042	0.0306122	0.512059	0.500928	3624	tags=30%, list=18%, signal=24%	IFNG/PPP3R2/ICOS/ITK/PDCD1/CSF2/CTLA4/CD3G/GRAP2/CD8A/CD28/IL10/PIK3CG/PTPRC/ZAP70/CD8B/CD247/CD40LG/CD3E/CD3D/LCK/PIK3R5/LCP2/LAT/AKT3/IL5/RASGRP1/CARD11/VAV1/MAPK12/PIK3CD/MAPK11	UCEC
KEGG_LEUKOCYTE_TRANSENDOTHELIAL_MIGRATION	KEGG_LEUKOCYTE_TRANSENDOTHELIAL_MIGRATION	116	0.594632	1.24543	0.0408163	0.577708	0.565149	4572	tags=38%, list=23%, signal=29%	CLDN17/ITK/CLDN18/VCAM1/RHOH/PRKCB/NOX3/MYL7/PIK3CG/MYL10/NCF1/ITGA4/ACTN3/PIK3R5/MYL2/ITGAL/CLDN14/MMP9/CYBB/RASSF5/NCF2/RAC2/NCF4/ITGAM/ITGB2/VAV1/MAPK12/CXCL12/CLDN20/PIK3CD/MAPK11/ACTN2/PLCG2/PRKCA/JAM3/PECAM1/ICAM1/MMP2/PTK2B/NOX1/THY1/CLDN11/MYL9/CTNNA3	UCEC
KEGG_NEUROACTIVE_LIGAND_RECEPTOR_INTERACTION	KEGG_NEUROACTIVE_LIGAND_RECEPTOR_INTERACTION	271	0.567417	1.2101	0.039604	0.577708	0.565149	3580	tags=43%, list=18%, signal=35%	TAAR5/MC2R/SSTR4/GABRB1/NPY4R/GABRA4/TSHB/MAS1/CCKAR/HTR1A/CSH1/HTR5A/RXFP2/CNR2/TRHR/BRS3/HTR2A/GLRA1/P2RX1/GABRG1/MCHR2/P2RY10/FSHR/LEP/GABRA6/HTR4/CHRNA2/PTGFR/P2RY8/PRSS3/P2RX5/TAAR2/OPRM1/GRIA1/MCHR1/DRD1/GLRA3/GABRA1/GRM8/HTR1B/TAAR1/DRD3/F2/GLP2R/F2RL2/GPR50/PTGIR/S1PR4/HTR1D/HCRTR2/P2RX7/PRLHR/HRH2/CYSLTR2/HRH3/PTGER3/CHRNA3/GRIN3A/PTGDR/SSTR3/CCKBR/GHSR/OPRD1/GRM3/P2RY13/ADORA2A/UTS2R/HT…	UCEC
KEGG_RIBOSOME	KEGG_RIBOSOME	87	-0.644548	-1.67762	0.0434783	0.571429	0.555737	6455	tags=83%, list=33%, signal=56%	RPL31/RPL37A/RPL41/RSL24D1/RPS17/RPS24/RPS27L/RPL38/RPS7/RPS6/RPS19/RPS10/RPS27A/RPL5/RPL6/RPL27/RPL23/RPL29/RPL10L/RPL39/RPL35A/RPS18/RPL4/RPL19/RPL3/RPS9/RPLP0/RPL10/RPL10A/FAU/RPL8/RPS5/RPL15/RPL24/RPS8/RPL9/RPS3/RPL21/RPL23A/RPL11/RPL13/RPL7/RPS27/RPS15A/RPL36/RPL32/RPL37/RPLP1/RPS21/RPS2/RPS15/RPL22/RPL28/RPS12/RPS13/RPS25/RPL30/RPSA/RPS23/RPL36A/RPL14/RPL18A/RPS4X/RPS28/RPLP2/UBA52/RPS16/RP…	UCS
KEGG_GRAFT_VERSUS_HOST_DISEASE	KEGG_GRAFT_VERSUS_HOST_DISEASE	37	0.751606	1.59805	0.027027	0.571429	0.555737	4044	tags=76%, list=21%, signal=60%	IL2/IFNG/KIR3DL2/KIR3DL1/FASLG/KLRC1/HLA-DOB/KLRD1/KIR2DL1/CD80/IL1B/HLA-DQA1/GZMB/TNF/HLA-DQB1/PRF1/HLA-DOA/HLA-DQA2/HLA-DMB/IL1A/HLA-DPA1/CD28/CD86/HLA-DMA/HLA-G/HLA-DRB5/IL6/HLA-F	UCS
KEGG_TYPE_I_DIABETES_MELLITUS	KEGG_TYPE_I_DIABETES_MELLITUS	41	0.728742	1.58942	0.0263158	0.571429	0.555737	4044	tags=66%, list=21%, signal=52%	IL2/IFNG/FASLG/HLA-DOB/LTA/INS/IL12B/CD80/IL1B/HLA-DQA1/GZMB/TNF/GAD1/HLA-DQB1/PRF1/HLA-DOA/HLA-DQA2/HLA-DMB/IL1A/HLA-DPA1/CD28/CD86/ICA1/HLA-DMA/HLA-G/HLA-DRB5/HLA-F	UCS
KEGG_HEMATOPOIETIC_CELL_LINEAGE	KEGG_HEMATOPOIETIC_CELL_LINEAGE	85	0.689397	1.57565	0.0125	0.571429	0.555737	4390	tags=67%, list=22%, signal=52%	MS4A1/IL9R/CSF2/CD1B/CD3G/CD1E/FLT3/IL7R/CSF3R/CD5/CD1A/CD2/CD22/CD7/CD3D/DNTT/ITGB3/CR2/CD19/IL5RA/ITGA2/IL4/IL1B/CD1C/IL2RA/TNF/CSF2RA/ITGAM/IL1A/CD1D/ITGA3/CD3E/CD8A/CD38/CR1/KIT/EPOR/IL7/GP1BA/CD37/GYPA/CD33/CD4/GP9/ITGA1/KITLG/CSF3/HLA-DRB5/IL6/CSF1R/IL5/FCGR1A/IL11/THPO/CD55/IL6R/CD9	UCS
KEGG_ARACHIDONIC_ACID_METABOLISM	KEGG_ARACHIDONIC_ACID_METABOLISM	58	0.701861	1.54053	0.0263158	0.571429	0.555737	3512	tags=45%, list=18%, signal=37%	PLA2G2D/CYP2C9/PLA2G2E/ALOX15/CYP2C19/CYP2C18/CYP4F3/GPX2/ALOX12B/CYP2B6/PLA2G12B/CYP4A22/ALOX5/PLA2G4B/GPX5/GGT6/PTGS1/CYP4F2/ALOX15B/JMJD7-PLA2G4B/PLA2G2A/PLA2G2F/GGT5/TBXAS1/PLA2G10/PLA2G1B	UCS
KEGG_ALLOGRAFT_REJECTION	KEGG_ALLOGRAFT_REJECTION	35	0.736072	1.53351	0.0422535	0.571429	0.555737	4044	tags=71%, list=21%, signal=57%	IL2/IFNG/FASLG/CD40LG/HLA-DOB/IL12B/CD80/IL4/IL10/HLA-DQA1/GZMB/TNF/HLA-DQB1/PRF1/HLA-DOA/HLA-DQA2/HLA-DMB/HLA-DPA1/CD28/CD86/HLA-DMA/HLA-G/HLA-DRB5/IL5/HLA-F	UCS
KEGG_T_CELL_RECEPTOR_SIGNALING_PATHWAY	KEGG_T_CELL_RECEPTOR_SIGNALING_PATHWAY	108	0.648534	1.48403	0.0126582	0.571429	0.555737	4041	tags=37%, list=21%, signal=30%	IL2/IFNG/CSF2/CD40LG/ICOS/CD3G/ITK/GRAP2/PDCD1/CTLA4/CD3D/LAT/PIK3CG/IL4/PPP3R2/LCK/CD247/IL10/PTPRC/CARD11/TNF/ZAP70/LCP2/RASGRP1/VAV1/MAPK13/PIK3R5/PTPN6/PRKCQ/CD3E/CD8A/CBLC/MAP3K8/CD28/CHP2/CD4/AKT3/NFAT5/IL5/TEC	UCS
KEGG_COMPLEMENT_AND_COAGULATION_CASCADES	KEGG_COMPLEMENT_AND_COAGULATION_CASCADES	69	0.658653	1.47248	0.0375	0.571429	0.555737	4459	tags=59%, list=23%, signal=46%	FGG/FGA/F2/MBL2/KNG1/FGB/C4BPA/C4BPB/SERPIND1/F9/C4A/F13B/C6/C9/C4B/SERPINA5/CFB/C7/CR2/SERPINA1/SERPINF2/C3/F3/PROC/KLKB1/CFI/CR1/PLAT/C1S/C2/C3AR1/SERPINE1/PLAUR/C5AR1/C8G/CFH/TFPI/CD46/CD55/PLG/PLAU	UCS
KEGG_DRUG_METABOLISM_CYTOCHROME_P450	KEGG_DRUG_METABOLISM_CYTOCHROME_P450	70	0.655236	1.45652	0.037037	0.571429	0.555737	2398	tags=50%, list=12%, signal=44%	GSTA2/UGT1A6/ADH7/UGT2B28/UGT1A3/UGT1A7/CYP2C9/GSTA1/CYP2A7/ADH4/GSTA3/CYP2A6/CYP2C19/UGT1A8/CYP2A13/ADH1A/UGT1A4/UGT2B15/CYP2C18/UGT2B11/ADH1B/FMO3/UGT1A10/CYP2B6/UGT2A3/UGT1A1/UGT2B4/GSTA5/UGT1A9/UGT2B10/CYP3A43/ADH6/ADH1C/UGT2B7/CYP2D6	UCS
KEGG_PPAR_SIGNALING_PATHWAY	KEGG_PPAR_SIGNALING_PATHWAY	69	0.642557	1.4365	0.0375	0.571429	0.555737	2493	tags=23%, list=13%, signal=20%	ADIPOQ/APOC3/FABP1/APOA2/CYP8B1/APOA1/PLIN1/AQP7/OLR1/FABP2/CYP4A22/FABP7/ACADL/SLC27A2/PCK1/FABP6	UCS
KEGG_METABOLISM_OF_XENOBIOTICS_BY_CYTOCHROME_P450	KEGG_METABOLISM_OF_XENOBIOTICS_BY_CYTOCHROME_P450	68	0.639231	1.43106	0.037037	0.571429	0.555737	2387	tags=49%, list=12%, signal=43%	GSTA2/UGT1A6/ADH7/UGT2B28/UGT1A3/UGT1A7/CYP2C9/GSTA1/ADH4/GSTA3/CYP2C19/UGT1A8/ADH1A/UGT1A4/UGT2B15/CYP2C18/UGT2B11/ADH1B/UGT1A10/CYP2B6/AKR1C4/UGT2A3/UGT1A1/UGT2B4/CYP2F1/GSTA5/UGT1A9/UGT2B10/CYP3A43/ADH6/ADH1C/AKR1C2/UGT2B7	UCS
KEGG_CYTOKINE_CYTOKINE_RECEPTOR_INTERACTION	KEGG_CYTOKINE_CYTOKINE_RECEPTOR_INTERACTION	263	0.568633	1.42593	0.0344828	0.571429	0.555737	3296	tags=45%, list=17%, signal=38%	IFNA13/IFNA17/IL2/IFNA2/IFNA6/CCR3/IFNG/IFNA7/TNFSF14/CCR8/TNFRSF9/CCR6/IL9R/AMHR2/CXCR2/CSF2/FASLG/CXCR1/IL22RA2/CD40LG/IL18RAP/CCR4/IL21/LTA/TNFSF11/CCL15/CCL25/FLT3/IFNE/CXCR3/CXCL9/TNFRSF17/IL7R/CXCR5/IL19/CSF3R/PPBP/CXCL13/IL12B/CD27/CXCR6/XCR1/CCR2/CXCL3/CCR7/CXCL5/TNFSF15/CCL22/CCR9/CCR5/CCL17/IL21R/TNFRSF11A/IL23A/IL26/IL13/CXCL11/TNFRSF13B/IL12RB1/CSF2RB/IL5RA/CXCL1/EDAR/CXCL2/IL4/CCL4/I…	UCS
KEGG_CELL_ADHESION_MOLECULES_CAMS	KEGG_CELL_ADHESION_MOLECULES_CAMS	131	0.605574	1.41356	0.0352941	0.571429	0.555737	4143	tags=49%, list=21%, signal=39%	CD40LG/ICOS/HLA-DOB/CLDN2/PDCD1/ITGB7/SPN/CADM3/ICAM3/CLDN16/CD2/CD22/ITGAL/CTLA4/CD274/CD80/CD6/MAG/ICOSLG/PTPRC/PDCD1LG2/CNTN1/SELL/HLA-DQA1/CLDN8/CLDN9/ITGB8/HLA-DQB1/CD226/CLDN6/CLDN23/HLA-DOA/CLDN19/HLA-DQA2/ITGAM/CLDN11/CNTNAP2/CLDN7/HLA-DMB/NRCAM/ICAM1/SELPLG/CD8A/HLA-DPA1/CLDN4/OCLN/VCAM1/CD28/CD86/L1CAM/CLDN18/HLA-DMA/CD4/NRXN3/HLA-G/MPZ/CDH1/SIGLEC1/HLA-DRB5/F11R/CLDN1/HLA-F/CDH3/ITGB2	UCS
KEGG_LEISHMANIA_INFECTION	KEGG_LEISHMANIA_INFECTION	69	0.63145	1.41167	0.0375	0.571429	0.555737	5009	tags=52%, list=26%, signal=39%	IFNG/FCGR3B/HLA-DOB/IL12B/NCF1/IL4/IL1B/IL10/HLA-DQA1/C3/TNF/TLR4/HLA-DQB1/MAPK13/HLA-DOA/HLA-DQA2/ITGAM/PTPN6/HLA-DMB/IL1A/HLA-DPA1/CR1/NCF2/TLR2/HLA-DMA/HLA-DRB5/FCGR1A/NCF4/ITGB2/FCGR3A/PTGS2/HLA-DPB1/HLA-DRA/STAT1/ITGA4/HLA-DRB1	UCS
KEGG_REGULATION_OF_AUTOPHAGY	KEGG_REGULATION_OF_AUTOPHAGY	35	0.811494	1.69955	0.0121951	0.164286	0.150376	1307	tags=20%, list=7%, signal=19%	IFNA1/IFNA10/IFNA2/BECN2/IFNG/IFNA5/IFNA21	UVM
KEGG_ANTIGEN_PROCESSING_AND_PRESENTATION	KEGG_ANTIGEN_PROCESSING_AND_PRESENTATION	80	0.7364	1.68202	0.0114943	0.164286	0.150376	2294	tags=24%, list=12%, signal=21%	IFNA1/IFNA10/IFNA2/KLRC3/KIR3DL3/KLRC4/KLRC1/KLRC2/IFNA5/KIR3DL2/KLRD1/IFNA21/LTA/HLA-DOB/CD8B/KIR2DL4/CD8A/KIR2DL1/CIITA	UVM
KEGG_NEUROACTIVE_LIGAND_RECEPTOR_INTERACTION	KEGG_NEUROACTIVE_LIGAND_RECEPTOR_INTERACTION	271	0.657312	1.62911	0.0103093	0.164286	0.150376	3243	tags=46%, list=17%, signal=39%	GH2/TAAR1/GHSR/TAAR8/MCHR2/HTR1E/NPY4R/CHRM2/CHRNB3/GLRA1/SSTR5/GABRA6/GABRG1/AVPR1B/DRD5/GABRA2/HTR5A/GRM5/GLRA3/GABRG2/TACR3/GRID2/AGTR2/DRD1/PTH2R/GRIA4/GABRA1/MC4R/GRIA1/GLRA2/GRM7/GABRA4/CHRNA6/GRIA3/GRIA2/GABRR2/GRM6/NPY2R/SSTR3/HTR1F/GRIN1/CHRNA2/PRSS1/CNR2/NPFFR1/HCRTR2/ADRB1/GABRR1/NMBR/HTR2C/GABRA3/CHRNA4/THRB/GRIK1/P2RY10/GCGR/ADRA1A/NPFFR2/GRM1/GRM3/GRM4/DRD3/GABRB2/TSHR/GRIN3B/GABRB1…	UVM
KEGG_CYTOSOLIC_DNA_SENSING_PATHWAY	KEGG_CYTOSOLIC_DNA_SENSING_PATHWAY	54	0.705335	1.56236	0.0117647	0.164286	0.150376	2644	tags=20%, list=13%, signal=18%	IFNA1/IFNA10/IFNA2/IFNA5/AIM2/IFNA21/IL18/ZBP1/IL1B/CXCL10/CCL4L2	UVM
KEGG_RNA_POLYMERASE	KEGG_RNA_POLYMERASE	28	0.750728	1.55055	0.0119048	0.164286	0.150376	82	tags=4%, list=0%, signal=4%	POLR2J2	UVM
KEGG_NATURAL_KILLER_CELL_MEDIATED_CYTOTOXICITY	KEGG_NATURAL_KILLER_CELL_MEDIATED_CYTOTOXICITY	131	0.639897	1.53015	0.0111111	0.164286	0.150376	4330	tags=37%, list=22%, signal=29%	IFNA1/IFNA10/IFNA2/KLRC3/KLRC1/KLRK1/KLRC2/IFNG/SH2D1A/IFNA5/KIR3DL2/KLRD1/FASLG/PRKCG/CSF2/IFNA21/LAT/SHC3/PPP3R2/CD48/TNF/ZAP70/NCR1/NCR3/LCK/KIR2DL4/CD247/CD244/PIK3CG/KIR2DL1/VAV3/RAET1E/FCGR3A/TNFSF10/TNFRSF10A/SHC4/PRKCB/LCP2/NFATC2/FAS/KIR3DL1/VAV1/ITGAL/ULBP1/MICB/KIR2DL3/PRF1/GZMB/TNFRSF10C	UVM
KEGG_GLYCEROLIPID_METABOLISM	KEGG_GLYCEROLIPID_METABOLISM	48	0.699277	1.52678	0.0125	0.164286	0.150376	1810	tags=15%, list=9%, signal=13%	LIPF/GK2/AWAT2/DGKB/PNLIP/LIPC/DGKE	UVM
KEGG_AUTOIMMUNE_THYROID_DISEASE	KEGG_AUTOIMMUNE_THYROID_DISEASE	50	0.683287	1.5025	0.0120482	0.164286	0.150376	2228	tags=28%, list=11%, signal=25%	IFNA1/IFNA10/IFNA2/IFNA5/CTLA4/TSHR/FASLG/TPO/IFNA21/HLA-DOB/IL4/IL10/CD40LG/IL5	UVM
KEGG_CYTOKINE_CYTOKINE_RECEPTOR_INTERACTION	KEGG_CYTOKINE_CYTOKINE_RECEPTOR_INTERACTION	263	0.601446	1.49987	0.0103093	0.164286	0.150376	3510	tags=42%, list=18%, signal=35%	GH2/IFNA1/IL22/IFNA10/IFNA2/CCL11/CXCR5/IFNW1/IL22RA1/CCR6/CXCL6/IL12B/IL21/IFNG/IL13/IFNE/IL22RA2/EGF/CCR8/IL1A/TNFRSF9/IFNA5/EDAR/CXCL13/TNFSF14/TNFRSF13B/CCR4/FASLG/CSF2/TPO/CCL22/IFNA21/TNFRSF17/XCR1/IL21R/LTA/CXCR6/IL15/IL11/IL9R/TNF/TNFSF11/XCL1/XCL2/GDF5/IL20/CCR7/TNFSF13B/CXCL5/IL7R/IL4/IL20RA/TNFSF4/IL10/NGFR/HGF/FLT3/CXCL11/CCR5/EPO/CCR2/CX3CR1/CCL21/IFNLR1/CD40LG/TNFRSF25/BMPR1B/CCL25/…	UVM
KEGG_OTHER_GLYCAN_DEGRADATION	KEGG_OTHER_GLYCAN_DEGRADATION	16	0.835128	1.49728	0.0123457	0.164286	0.150376	1351	tags=12%, list=7%, signal=12%	NEU2/NEU4	UVM
KEGG_LONG_TERM_DEPRESSION	KEGG_LONG_TERM_DEPRESSION	68	0.659225	1.4769	0.0120482	0.164286	0.150376	3382	tags=29%, list=17%, signal=24%	PPP1R17/GRM5/GRID2/GRIA1/GRIA3/GRIA2/CRH/PLA2G12B/GRM1/PLA2G4E/PLCB1/PRKCG/PLA2G3/IGF1/JMJD7-PLA2G4B/ITPR2/PLA2G4B/PRKCB/PLA2G10/GUCY1A2	UVM
KEGG_JAK_STAT_SIGNALING_PATHWAY	KEGG_JAK_STAT_SIGNALING_PATHWAY	155	0.596218	1.4432	0.0108696	0.164286	0.150376	4249	tags=38%, list=22%, signal=30%	GH2/IFNA1/IL22/IFNA10/IFNA2/IFNW1/IL22RA1/IL12B/IL21/IFNG/IL13/IFNE/IL22RA2/IFNA5/CSF2/TPO/IFNA21/IL21R/IL15/IL11/IL9R/IL20/IL7R/STAT4/IL4/IL20RA/IL10/EPO/IFNLR1/PIK3CG/LIF/IL2RA/IL5/IL7/LEPR/IL5RA/IL19/IRF9/IL12RB1/IL12A/CSF2RB/IL2RB/LIFR/IFNK/CRLF2/CNTF/IL26/IL13RA2/PRL/IL15RA/IL2/JAK2/IL10RA/CSF3R/OSM/IL23R/JAK3/IFNL1/SPRY3	UVM
KEGG_CALCIUM_SIGNALING_PATHWAY	KEGG_CALCIUM_SIGNALING_PATHWAY	177	0.586654	1.44075	0.010989	0.164286	0.150376	3357	tags=31%, list=17%, signal=26%	CHRM2/SLC25A31/AVPR1B/DRD5/HTR5A/GRM5/TACR3/SLC8A3/DRD1/CACNA1G/PRKACG/CACNA1I/GRIN1/ATP2B2/ADRB1/HTR2C/RYR2/CACNA1E/ADRA1A/GRM1/ADCY8/CALML6/CACNA1S/CALML5/PLCB1/PRKCG/TACR1/CHRM5/PPP3R2/CYSLTR1/HTR2A/CD38/CAMK2B/PTGFR/MYLK2/ERBB4/ADORA2A/CYSLTR2/PHKG1/OXTR/ATP2A1/AGTR1/PLN/CCKBR/GRIN2C/ITPR2/P2RX5/LHCGR/ADCY1/PRKCB/PDGFRA/CCKAR/HTR2B/P2RX1/CACNA1F	UVM
KEGG_RIG_I_LIKE_RECEPTOR_SIGNALING_PATHWAY	KEGG_RIG_I_LIKE_RECEPTOR_SIGNALING_PATHWAY	70	0.641726	1.43496	0.0120482	0.164286	0.150376	3371	tags=23%, list=17%, signal=19%	IFNA1/IFNA10/IFNA2/IFNW1/IL12B/IFNE/IFNA5/IFNA21/TNF/MAPK10/CXCL10/IL12A/IFNK/CASP10/IFIH1/DDX3Y	UVM
KEGG_LONG_TERM_POTENTIATION	KEGG_LONG_TERM_POTENTIATION	70	0.614355	1.37375	0.0240964	0.295582	0.270556	3087	tags=26%, list=16%, signal=22%	GRM5/GRIA1/PRKACG/GRIA2/GRIN1/GRM1/ADCY8/CALML6/CALML5/PLCB1/PRKCG/PPP3R2/CAMK2B/PPP1R1A/GRIN2C/ITPR2/ADCY1/PRKCB	UVM
KEGG_GLYOXYLATE_AND_DICARBOXYLATE_METABOLISM	KEGG_GLYOXYLATE_AND_DICARBOXYLATE_METABOLISM	16	-0.851732	-1.95281	0.047619	0.329749	0.30183	41	tags=12%, list=0%, signal=12%	MTHFD1L/HAO1	UVM
KEGG_CITRATE_CYCLE_TCA_CYCLE	KEGG_CITRATE_CYCLE_TCA_CYCLE	30	0.679573	1.40562	0.037037	0.329749	0.30183	178	tags=3%, list=1%, signal=3%	PDHA2	UVM
KEGG_GLYCOSPHINGOLIPID_BIOSYNTHESIS_LACTO_AND_NEOLACTO_SERIES	KEGG_GLYCOSPHINGOLIPID_BIOSYNTHESIS_LACTO_AND_NEOLACTO_SERIES	26	0.683865	1.4	0.0352941	0.329749	0.30183	2872	tags=31%, list=15%, signal=26%	FUT9/FUT6/FUT7/B3GALT1/B3GALT2/FUT5/B3GNT5/ST8SIA1	UVM
KEGG_AMYOTROPHIC_LATERAL_SCLEROSIS_ALS	KEGG_AMYOTROPHIC_LATERAL_SCLEROSIS_ALS	53	0.612613	1.34629	0.0361446	0.329749	0.30183	2715	tags=21%, list=14%, signal=18%	SLC1A2/GRIA1/GRIA2/GRIN1/NEFL/PPP3R2/PRPH2/TNF/PRPH/NEFM/GRIN2C	UVM
KEGG_TYPE_I_DIABETES_MELLITUS	KEGG_TYPE_I_DIABETES_MELLITUS	41	0.629302	1.3416	0.0493827	0.329749	0.30183	4471	tags=51%, list=23%, signal=40%	IL12B/IFNG/GAD2/IL1A/PTPRN/GAD1/FASLG/LTA/TNF/HLA-DOB/IL1B/IL12A/FAS/IL2/CD80/CD28/PRF1/GZMB/CPE/HLA-F/HLA-DOA	UVM
KEGG_TOLL_LIKE_RECEPTOR_SIGNALING_PATHWAY	KEGG_TOLL_LIKE_RECEPTOR_SIGNALING_PATHWAY	102	0.565349	1.33033	0.0449438	0.329749	0.30183	3265	tags=20%, list=17%, signal=16%	IFNA1/IFNA10/IFNA2/IL12B/IFNA5/IFNA21/TNF/MAPK10/CXCL11/PIK3CG/TLR6/IL1B/CXCL10/CXCL9/TLR8/LBP/IL12A/TLR2/CCL4/TLR3	UVM
KEGG_INTESTINAL_IMMUNE_NETWORK_FOR_IGA_PRODUCTION	KEGG_INTESTINAL_IMMUNE_NETWORK_FOR_IGA_PRODUCTION	46	0.607243	1.30661	0.0379747	0.329749	0.30183	4471	tags=46%, list=23%, signal=35%	AICDA/PIGR/ICOS/TNFRSF13B/TNFRSF17/ITGA4/IL15/HLA-DOB/TNFSF13B/IL4/IL10/CD40LG/CCL25/IL5/CCR9/MADCAM1/IL15RA/IL2/CD80/CD28/HLA-DOA	UVM
KEGG_T_CELL_RECEPTOR_SIGNALING_PATHWAY	KEGG_T_CELL_RECEPTOR_SIGNALING_PATHWAY	108	0.549657	1.28689	0.045977	0.329749	0.30183	2420	tags=24%, list=12%, signal=21%	PAK5/IFNG/RASGRP1/ICOS/CTLA4/CD3G/ITK/CSF2/PDCD1/LAT/PPP3R2/TNF/ZAP70/CD8B/IL4/IL10/PTPRC/LCK/CD8A/CD247/CD40LG/PIK3CG/IL5/VAV3/GRAP2/CD3D	UVM
KEGG_OLFACTORY_TRANSDUCTION	KEGG_OLFACTORY_TRANSDUCTION	359	0.495971	1.243	0.040404	0.329749	0.30183	1202	tags=18%, list=6%, signal=18%	OR1L3/OR52J3/OR2B11/OR11L1/OR6C70/OR51I1/OR52K2/OR9A4/OR51I2/OR10A4/OR5P3/OR2J3/OR4D11/OR5AC2/OR1D2/OR13C8/OR13C2/OR4K5/OR5D18/OR56A5/OR14C36/OR4F6/OR7G2/OR5B21/OR5T2/OR8D4/OR6C1/OR4L1/OR51B6/OR4K2/OR1L1/OR10H5/OR10P1/OR4N2/OR10V1/OR4F4/OR6K6/OR4F17/OR6B3/OR1N1/CNGA3/OR13G1/GUCA1C/PDC/PRKACG/CNGB1/OR1J4/OR2AT4/OR11G2/OR10A2/OR2A2/OR1Q1/OR52H1/CLCA4/OR5K2/OR2A5/OR2K2/OR10Q1/OR2J2/CALML6/OR1J2/OR1J…	UVM

## Sheet: GSEA HALLMARK
ID	Description	setSize	enrichmentScore	NES	pvalue	p.adjust	qvalues	rank	leading_edge	core_enrichment	cancer
HALLMARK_COAGULATION	HALLMARK_COAGULATION	138	-0.480279	-1.31073	0.0232558	1	1	2672	tags=22%, list=14%, signal=20%	MST1/S100A13/F10/APOC1/HMGCS2/MMP9/MMP11/CFB/CPB2/HPN/C8B/HNF4A/KLKB1/MMP1/PF4/GP9/ITIH1/F13B/F2/MMP7/MBL2/GDA/MMP3/HRG/APOC3/CTSE/MMP8/COMP/LEFTY2/F11/C8A	ACC
HALLMARK_EPITHELIAL_MESENCHYMAL_TRANSITION	HALLMARK_EPITHELIAL_MESENCHYMAL_TRANSITION	198	0.717558	2.11235	0.0136986	0.0640205	0.047173	4486	tags=72%, list=23%, signal=56%	MFAP5/LRRC15/COL11A1/SGCD/SFRP4/GREM1/NTM/GAS1/COMP/FAP/PRRX1/SFRP1/CDH11/CDH2/ADAM12/INHBA/SLIT2/POSTN/COL8A2/RGS4/FBN1/MYLK/ECM2/TNC/MMP3/DCN/LAMA1/LOX/ABI3BP/VCAN/COL16A1/COL5A1/THBS2/FBLN2/CTHRC1/ELN/FBN2/NID2/ITGB3/COL6A3/FMOD/CXCL12/IL6/GEM/SPOCK1/NNMT/LAMA2/DPYSL3/FBLN5/MATN3/COL12A1/COL5A3/APLP1/FN1/SERPINE2/COL5A2/TGFBI/PMEPA1/TAGLN/FZD8/FSTL3/CALD1/PDGFRB/VCAM1/ECM1/SCG2/PCOLCE2/ANPEP/F…	BLCA
HALLMARK_ALLOGRAFT_REJECTION	HALLMARK_ALLOGRAFT_REJECTION	196	0.68822	2.02727	0.0136986	0.0640205	0.047173	4095	tags=57%, list=21%, signal=46%	IL9/PRKCG/CCL7/KRT1/IL12B/CCL19/INHBA/CCR2/CD79A/CCL11/CXCL13/TRAT1/MMP9/IL16/ITK/CRTAM/IL10/IFNG/TGFB2/CARTPT/TLR6/IRF4/CXCL9/CD80/CCR5/CXCR3/IL6/IRF8/CD28/FCGR2B/SIT1/HLA-DOB/CD3G/CD247/GZMB/FASLG/CCL13/IL12RB1/CD40LG/HDAC9/IL11/TLR1/NCR1/PTPRC/FYB1/CD86/CCL2/ITGB2/ZAP70/IL2RA/THY1/BCAT1/HLA-DQA1/LY86/NLRP3/CCL4/CD3E/APBB1/GPR65/CD2/ITGAL/PRF1/RPL3L/LTB/SPI1/CD8A/IL2RB/CDKN2A/STAT4/CD7/IL2/IGSF…	BLCA
HALLMARK_APICAL_JUNCTION	HALLMARK_APICAL_JUNCTION	199	0.593985	1.73908	0.0140845	0.0640205	0.047173	4027	tags=35%, list=21%, signal=28%	CDSN/DSC1/ACTC1/CNTN1/NRXN2/FLNC/CDH11/NEGR1/SPEG/CADM3/CALB2/PPP2R2C/CLDN6/SLIT2/FBN1/ACTG2/MMP9/VCAN/COL16A1/NEXN/CLDN14/CLDN9/KCNH2/ACTN3/ADAM23/TGFBI/VCAM1/PTPRC/FYB1/CD86/NFASC/SLC30A3/THY1/JAM3/LAYN/AKT3/NRTN/CD209/LAMA3/CERCAM/CD274/CLDN11/CDH15/KRT31/MYL9/SIRPA/MAP3K20/MMP2/BMP1/ACTA1/ALOX15B/ICAM1/TSPAN4/RHOF/LAMC2/ADAMTS5/ACTN1/AMH/DSC3/MYH10/ICAM5/EVL/MSN/TNFRSF11B/TRAF1/EPB41L2/SGCE/M…	BLCA
HALLMARK_INFLAMMATORY_RESPONSE	HALLMARK_INFLAMMATORY_RESPONSE	200	0.579292	1.69359	0.0140845	0.0640205	0.047173	4572	tags=50%, list=23%, signal=39%	CCL7/IL12B/INHBA/TNFAIP6/TNFRSF9/KCNA3/LTA/CLEC5A/CD70/IL10/IL7R/AQP9/CXCL9/MARCO/P2RX7/PTGIR/NOD2/SPHK1/ITGB3/SCN1B/PDPN/IL6/OLR1/CMKLR1/FPR1/MEFV/GPR132/ROS1/SLAMF1/MSR1/C3AR1/CXCL11/CYBB/SLC31A2/CCL24/PCDH7/OSM/TNFSF9/TLR1/PIK3R5/CD48/GPR183/IL10RA/CCL2/AXL/CCR7/SLC1A2/ADGRE1/PDE4B/C5AR1/NLRP3/GP1BA/SELE/CXCR6/EDN1/IL2RB/EMP3/RGS1/EBI3/APLNR/ITGA5/CXCL10/SELL/LCP2/RASGRP1/CCL5/OSMR/BEST1/IL18R…	BLCA
HALLMARK_KRAS_SIGNALING_UP	HALLMARK_KRAS_SIGNALING_UP	198	0.569756	1.67725	0.0136986	0.0640205	0.047173	4051	tags=43%, list=21%, signal=34%	PCP4/CFHR2/ITGBL1/PRRX1/GFPT2/INHBA/WNT7A/SPON1/MMP11/PDCD1LG2/NGF/MMP9/USH1C/HSD11B1/IL7R/TLR8/ADAMDEC1/TMEM158/CSF2/ETV1/SCN1B/ADGRA2/TMEM100/CMKLR1/IRF8/DOCK2/FGF9/HKDC1/IKZF1/C3AR1/CD37/HDAC9/RETN/IL10RA/ITGB2/GYPC/TMEM176A/CSF2RA/MAFB/F13A1/LAT2/PEG3/LY96/TMEM176B/CLEC4A/MMD/PRDM1/CXCL10/CCND2/MAP4K1/TNNT2/AKAP12/ANKH/FCER1G/IL2RG/EPB41L3/GPNMB/PLAUR/ANO1/RBP4/APOD/ST6GAL1/PPBP/SPP1/ARG1/EPH…	BLCA
HALLMARK_INTERFERON_GAMMA_RESPONSE	HALLMARK_INTERFERON_GAMMA_RESPONSE	198	0.558455	1.64398	0.0136986	0.0640205	0.047173	4996	tags=38%, list=25%, signal=29%	CCL7/TNFAIP6/ZBP1/IRF4/CXCL9/FCGR1A/IL6/CMKLR1/IRF8/FPR1/CD38/GBP6/CXCL11/P2RY14/C1S/VCAM1/CSF2RB/IL10RA/CD86/CCL2/FGL2/HLA-DQA1/PDE4B/SELP/IL2RB/STAT4/CD274/EPSTI1/CXCL10/IFI30/LCP2/C1R/IDO1/CCL5/GPR18/ICAM1/GZMA/SLAMF7/RSAD2/FAS/CD69/SECTM1/SSPN/MT2A/LATS2/SERPING1/BATF2/ISG20/SOCS1/CFB/IL15RA/IL18BP/TNFAIP3/IFIT1/ITGB7/NLRC5/CIITA/SOD2/GBP4/IFIT2/MTHFD2/IFIT3/HLA-DRB1/SAMD9L/PTGS2/SP110/IFITM2…	BLCA
HALLMARK_TNFA_SIGNALING_VIA_NFKB	HALLMARK_TNFA_SIGNALING_VIA_NFKB	199	0.56147	1.64388	0.0140845	0.0640205	0.047173	5646	tags=50%, list=29%, signal=36%	IL12B/GFPT2/INHBA/TNFAIP6/TNFRSF9/TNC/MSC/EGR2/IL7R/CD80/SPHK1/CSF2/IL6/GEM/OLR1/EGR3/CXCL11/PMEPA1/TNFSF9/BCL2A1/GPR183/CCL2/SLC2A3/PLEK/PDE4B/CCL4/EDN1/SERPINB2/TNF/CXCL10/NR4A3/CCL5/ICAM1/PLAUR/TUBB2A/CXCL2/F3/CD69/KLF9/IRS2/BIRC3/PTX3/SLC16A6/PLAU/FUT4/CSF1/RCAN1/IL1B/IL15RA/G0S2/LIF/CLCF1/TRAF1/SERPINE1/TNFAIP3/PLK2/CD44/GADD45B/SOD2/KLF2/IL1A/IFIT2/AREG/ACKR3/EGR1/DENND5A/PTPRE/CD83/SPSB1/N…	BLCA
HALLMARK_MYOGENESIS	HALLMARK_MYOGENESIS	199	0.561362	1.64356	0.0140845	0.0640205	0.047173	4308	tags=47%, list=22%, signal=37%	NOS1/MYL7/ACTC1/CASQ2/MYH4/MYH8/SGCD/MYL2/SGCA/MYH1/PTGIS/DES/GNAO1/ADAM12/SPEG/NCAM1/CHRNA1/HSPB2/CAV3/MYH11/MYLK/IGF1/MYL3/SORBS1/PYGM/CACNG1/CRYAB/FHL1/REEP1/AEBP1/SPHK1/COL6A3/COX6A2/LAMA2/FXYD1/KCNH2/MYH3/ACTN3/GJA5/TAGLN/DMD/SOD3/MYOM1/DTNA/RYR1/COL3A1/ITGA7/NAV2/COL1A1/COL15A1/COL6A2/COX7A1/LDB3/CACNA1H/FGF2/APLNR/TNNT1/MYH2/BIN1/EPHB3/TNNT2/MRAS/ACTA1/HSPB8/CKM/TPM2/MYBPC3/APOD/STC2/MAPK1…	BLCA
HALLMARK_COMPLEMENT	HALLMARK_COMPLEMENT	200	0.55622	1.62614	0.0140845	0.0640205	0.047173	4906	tags=46%, list=25%, signal=34%	CR2/APOA4/LTF/HNF4A/GZMK/ZFPM2/MMP8/CASP5/CTSV/ITIH1/CDA/IL6/DPP4/OLR1/TMPRSS6/HPCAL4/FN1/GZMB/PRSS3/ZEB1/CD40LG/F10/C1S/PIK3R5/TIMP2/KLK1/F5/S100A12/PLEK/ITGAM/MMP13/PIK3CG/SERPINA1/MT3/GP1BA/DOCK10/GNGT2/FCN1/CR1/MMP12/PLA2G7/SERPINB2/PCSK9/CDK5R1/GNB4/GNG2/LCP2/C1R/RASGRP1/CCL5/FCER1G/KCNIP3/WAS/PLAUR/GZMA/FYN/F3/C1QC/C3/CPM/C1QA/LCK/ME1/C2/SPOCK2/SERPING1/LRP1/PDGFB/CFB/C9/SERPINE1/TNFAIP3/PH…	BLCA
HALLMARK_IL2_STAT5_SIGNALING	HALLMARK_IL2_STAT5_SIGNALING	198	0.547672	1.61224	0.0136986	0.0640205	0.047173	5665	tags=46%, list=29%, signal=33%	PENK/TNFRSF9/ADAM19/TNFRSF8/RHOH/IL10/CCR4/F2RL2/IRF4/CSF2/ENPP1/PTH1R/ICOS/LRIG1/IRF8/CTLA4/CD79B/IL1R2/APLP1/EOMES/GATA1/ECM1/GLIPR2/CD48/IL10RA/CD86/SLC2A3/IL2RA/FGL2/CST7/SYT11/HOPX/SELP/GPR83/GPR65/TGM2/LTB/RORA/IL2RB/CXCL10/SELL/CCND2/COL6A1/BATF3/TNFRSF18/ITIH5/TNFRSF4/PTGER2/NT5E/SPP1/IL13/SHE/EMP1/SOCS1/CSF1/LIF/NCS1/TRAF1/CD44/TNFRSF1B/GADD45B/GBP4/MYO1E/DENND5A/CD83/CISH/ENO3/IL18R1/MA…	BLCA
HALLMARK_KRAS_SIGNALING_DN	HALLMARK_KRAS_SIGNALING_DN	198	0.47462	1.39719	0.0136986	0.0640205	0.047173	2773	tags=30%, list=14%, signal=26%	VPREB1/NOS1/FGF16/ACTC1/KLK7/KLK8/TCL1A/SSTR4/CPA2/SCN10A/SLC12A3/ARHGDIG/KCNMB1/KRT1/IL12B/NPHS1/TENM2/LGALS7/TSHB/UGT2B17/CDH16/PTGFR/CCR8/ALOX12B/NPY4R/RGS11/SLC6A3/CACNG1/IFNG/ITIH3/TGFB2/SHOX2/HTR1D/EPHA5/CD80/PDCD1/ABCG4/ATP4A/CALCB/EDAR/MEFV/GDNF/FGF22/CNTFR/COPZ2/CD40LG/OXT/ADRA2C/SLC30A3/TGM1/RYR1/NUDT11/GP1BA/EDN1/RYR2/EFHD1/ITGB1BP2/SERPINB2/TCF7L1/KCNN1	BLCA
HALLMARK_UV_RESPONSE_DN	HALLMARK_UV_RESPONSE_DN	141	0.498971	1.39961	0.0277778	0.106838	0.0787224	5329	tags=39%, list=27%, signal=29%	COL11A1/KCNMA1/RGS4/PTGFR/AMPH/EFEMP1/ITGB3/MAP1B/FBLN5/COL5A2/PDGFRB/CELF2/COL1A2/COL3A1/COL1A1/AKT3/PMP22/CDON/PIK3CD/IGFBP5/GCNT1/MMP16/CAV1/FYN/CAP2/GRK5/F3/DAB2/MGLL/KALRN/ATXN1/MT1E/LTBP1/SDC2/BDNF/SYNE1/SERPINE1/DLC1/FZD2/SMAD7/NR3C1/APBB2/SNAI2/HAS2/NOTCH2/PTPN21/SLC7A1/VAV2/ATP2B4/SCHIP1/RUNX1/PDLIM5/DUSP1/PRKAR2B/NRP1	BLCA
HALLMARK_MITOTIC_SPINDLE	HALLMARK_MITOTIC_SPINDLE	198	0.448658	1.32076	0.0273973	0.106838	0.0787224	7106	tags=52%, list=36%, signal=33%	DOCK2/PALLD/BIN1/ARHGAP29/RHOF/FLNA/FGD6/MYH10/RASAL2/CLIP2/SORBS2/EPB41L2/DOCK4/ANLN/GSN/PREX1/MYO1E/STK38L/NEDD9/SYNPO/KIF23/NOTCH2/AKAP13/KIF4A/OPHN1/KIF15/RAPGEF5/KIFAP3/TRIO/KIF20B/TPX2/BRCA2/CDC42EP1/VCL/PLEKHG2/DLGAP5/DST/CENPF/ARHGAP4/BUB1/NIN/ARHGAP10/PDLIM5/BIRC5/KIF3C/KIF2C/AURKA/SPTAN1/KIF11/PRC1/TUBA4A/CCNB2/SAC3D1/ARHGEF3/PLK1/CENPJ/ECT2/NDC80/CDK5RAP2/CLIP1/ESPL1/FGD4/CCDC88A/NEK2/…	BLCA
HALLMARK_IL6_JAK_STAT3_SIGNALING	HALLMARK_IL6_JAK_STAT3_SIGNALING	87	0.572665	1.47359	0.03125	0.111607	0.0822368	5029	tags=54%, list=26%, signal=40%	CCL7/REG1A/CXCL13/CXCL9/CSF2/ITGB3/IL6/CD38/PDGFC/IL1R2/CNTFR/CXCL11/IL12RB1/PIK3R5/CSF2RB/IL2RA/CSF2RA/LTB/ITGA4/EBI3/TNF/CXCL10/CCR1/OSMR/IL2RG/PLA2G2A/CD14/CRLF2/FAS/IL1R1/INHBE/HMOX1/SOCS1/CSF1/IL1B/IL15RA/CD44/TNFRSF1B/TNFRSF12A/IL18R1/A2M/CD36/ACVRL1/SOCS3/STAT1/IL3RA/CXCL3	BLCA
HALLMARK_APOPTOSIS	HALLMARK_APOPTOSIS	160	0.47359	1.34219	0.0434783	0.144928	0.106789	6066	tags=43%, list=31%, signal=30%	DCN/TGFB2/IL6/CD38/PLPPR4/NEFH/EGR3/LEF1/FASLG/PDGFRB/TIMP2/LUM/TIMP3/CD2/PRF1/AVPR1A/TNF/CCND2/MMP2/ANKH/BGN/CAV1/CD14/F2R/FAS/CD69/BIRC3/HGF/ISG20/HMOX1/EMP1/DPYD/IL1B/GPX3/IGFBP6/CD44/GADD45B/GUCY2D/TNFRSF12A/SOD2/SMAD7/ANXA1/GSN/NEDD9/IL1A/CDC25B/IFNB1/CCNA1/PLCB2/FEZ1/CYLD/IFITM3/CLU/TIMP1/BIK/JUN/SPTAN1/IL18/EREG/TAP1/IRF1/BRCA1/BMF/IER3/ROCK1/BCL2L11/PPP2R5B/PEA15/LGALS3	BLCA
HALLMARK_INTERFERON_GAMMA_RESPONSE	HALLMARK_INTERFERON_GAMMA_RESPONSE	198	0.691497	2.02797	0.0131579	0.0735294	0.0588235	4862	tags=68%, list=25%, signal=52%	GBP6/CCL7/BANK1/ZBP1/CXCL11/IDO1/IRF4/CD38/CD274/GPR18/STAT4/EPSTI1/XCL1/FCGR1A/RSAD2/CXCL9/TNFAIP6/SLAMF7/CFH/FPR1/SOCS1/GZMA/CD69/CIITA/IL7/KLRK1/ITGB7/CD86/IL2RB/IRF8/IFI30/IL15/VCAM1/MX2/BATF2/C1S/P2RY14/FAS/CXCL10/LCP2/ST8SIA4/SAMD9L/CSF2RB/GBP4/CCL2/SP110/IL10RA/OASL/IL18BP/HLA-DQA1/FGL2/NLRC5/IFI44L/SSPN/C1R/CCL5/PSMB9/RTP4/CD40/IFI27/CASP1/IL15RA/SERPING1/HLA-G/ST3GAL5/XAF1/IFIT3/OAS2/LAT…	BRCA
HALLMARK_ALLOGRAFT_REJECTION	HALLMARK_ALLOGRAFT_REJECTION	196	0.684429	2.00085	0.0133333	0.0735294	0.0588235	3938	tags=62%, list=20%, signal=50%	IFNG/CCL11/IL12B/NCR1/CCL7/CD80/IL2/IL11/CRTAM/KRT1/KLRD1/TRAT1/BCAT1/FASLG/ITK/CCL13/IL2RA/CD3G/GZMB/IL16/INHBA/CXCR3/IRF4/IL10/CD96/PRKCB/STAT4/CCL22/IL18RAP/CCR2/CD40LG/SIT1/CD28/IL12RB1/CD7/CD79A/ZAP70/CD247/CXCL13/CD8B/IL13/CXCL9/CCR5/CD3D/PRF1/LCK/SOCS1/CD3E/GZMA/CD2/IL7/GPR65/CD86/IL2RG/LTB/FCGR2B/IL2RB/CCND2/IRF8/C2/MMP9/HLA-DOB/PTPRC/CD8A/CCL4/IL15/THY1/TGFB2/MAP4K1/FYB1/IGSF6/FAS/LCP2/S…	BRCA
HALLMARK_EPITHELIAL_MESENCHYMAL_TRANSITION	HALLMARK_EPITHELIAL_MESENCHYMAL_TRANSITION	198	0.661259	1.93929	0.0131579	0.0735294	0.0588235	4328	tags=69%, list=22%, signal=54%	COL11A1/GREM1/MMP1/LRRC15/CDH2/COL7A1/NTM/MFAP5/ADAM12/FAP/SGCD/COL8A2/COMP/INHBA/MMP3/EDIL3/CDH11/RGS4/WNT5A/FBN1/GAS1/LOX/ECM2/SPOCK1/PRRX1/NT5E/MATN3/NID2/DCN/BMP1/COL5A3/THBS2/COL5A1/VCAN/COL12A1/SFRP4/TNFRSF11B/DPYSL3/TIMP3/COL5A2/LOXL2/MXRA5/SLIT3/EFEMP2/LOXL1/WIPF1/MMP2/PLAUR/CTHRC1/IL32/PCOLCE/IL15/THY1/VCAM1/COL6A3/LUM/TGFBI/FAS/FBLN2/GLIPR1/FN1/NNMT/FBLN1/LAMA1/POSTN/EMP3/ABI3BP/COL1A2/…	BRCA
HALLMARK_INTERFERON_ALPHA_RESPONSE	HALLMARK_INTERFERON_ALPHA_RESPONSE	95	0.680891	1.89049	0.0140845	0.0735294	0.0588235	5271	tags=69%, list=27%, signal=51%	CXCL11/EPSTI1/RSAD2/IL7/IFI30/IL15/LAMP3/BATF2/CCRL2/C1S/CXCL10/SAMD9L/SELL/GBP4/SP110/OASL/IFI44L/PSMB9/RTP4/IFI27/CASP1/IFIT3/CMPK2/IRF1/SAMD9/IFIT2/IL4R/IFI44/NMI/MX1/GBP2/OAS1/PARP14/HERC6/IFITM1/ISG20/TAP1/PARP9/ISG15/CD74/IFI35/TRIM21/IRF7/UBE2L6/IFITM2/BST2/IFIH1/DDX60/CSF1/TMEM140/UBA7/IFITM3/PSMB8/B2M/LPAR6/PSME2/STAT2/TRIM5/IRF9/PROCR/HLA-C/PLSCR1/LAP3/TRAFD1/LY6E/CASP8	BRCA
HALLMARK_INFLAMMATORY_RESPONSE	HALLMARK_INFLAMMATORY_RESPONSE	200	0.628745	1.85422	0.012987	0.0735294	0.0588235	4333	tags=61%, list=22%, signal=48%	TNFRSF9/LTA/IL12B/CCL7/CD70/ROS1/PCDH7/MEP1A/HAS2/AQP9/CXCL11/TNFSF9/SLAMF1/CXCR6/PDPN/INHBA/IL10/KCNA3/ADGRE1/NDP/CLEC5A/CCL22/IL18RAP/PTGIR/IL1A/CCL17/CCL24/OSM/CXCL9/TNFAIP6/LCK/FPR1/CCR7/CD69/IL7R/OLR1/HRH1/SGMS2/TNFSF15/ADM/IL2RB/IL18R1/GPR132/CD48/PLAUR/IL15/LAMP3/AXL/CCRL2/MARCO/KCNJ2/MSR1/CXCL10/PIK3R5/LCP2/P2RY2/GP1BA/EBI3/IL1R1/EMP3/SELL/CXCL8/C5AR1/CCL2/IL10RA/SPHK1/RGS16/TLR3/NLRP3/PT…	BRCA
HALLMARK_IL6_JAK_STAT3_SIGNALING	HALLMARK_IL6_JAK_STAT3_SIGNALING	87	0.628977	1.70568	0.0147059	0.0735294	0.0588235	4328	tags=54%, list=22%, signal=42%	CCL7/CSF2/IL9R/CXCL11/IL2RA/CD38/IL12RB1/CXCL13/CXCL9/IL1R2/SOCS1/CRLF2/IL7/IL2RG/LTB/IL18R1/FAS/DNTT/CXCL10/PIK3R5/ITGA4/CCR1/CSF2RB/EBI3/IL1R1/PDGFC/PF4/IL15RA/CSF2RA/IL1B/IRF1/OSMR/IL4R/TNFRSF12A/TGFB1/TNFRSF1B/ACVRL1/TLR2/PIM1/STAT1/TNF/PLA2G2A/HMOX1/SOCS3/CSF1/CXCL1/ITGB3	BRCA
HALLMARK_TNFA_SIGNALING_VIA_NFKB	HALLMARK_TNFA_SIGNALING_VIA_NFKB	199	0.578016	1.69865	0.0131579	0.0735294	0.0588235	5280	tags=55%, list=27%, signal=41%	TNFRSF9/IL12B/CD80/CSF2/KYNU/SERPINB2/CXCL11/TNFSF9/MSC/INHBA/GFPT2/IL1A/PLAU/TNFAIP6/CD69/IL7R/OLR1/BCL2A1/PLAUR/CCL4/CCRL2/SLC2A6/CXCL10/SLC2A3/PLEK/TNFAIP8/CCL2/SPHK1/SIK1/CCL5/TNC/IL18/GPR183/LIF/SERPINE1/IL15RA/F2RL1/BIRC3/SPSB1/PTGER4/IL1B/SERPINB8/ICAM1/TRAF1/IRF1/PMEPA1/ATF3/IFIT2/CCL20/ACKR3/TNFAIP3/CD83/TLR2/DRAM1/FOSL1/EGR2/FUT4/PTPRE/TAP1/RELB/TNF/GADD45B/HBEGF/NR4A3/SGK1/FOS/EDN1/ABC…	BRCA
HALLMARK_IL2_STAT5_SIGNALING	HALLMARK_IL2_STAT5_SIGNALING	198	0.563193	1.65169	0.0131579	0.0735294	0.0588235	4926	tags=47%, list=25%, signal=36%	TNFRSF9/ICOS/CTLA4/CSF2/PTH1R/DRC1/CCR4/EOMES/IL2RA/ADAM19/IRF4/IL10/TNFRSF8/CST7/IL1RL1/NT5E/HOPX/IL13/IL1R2/BATF3/SOCS1/GPR65/CD86/LTB/IL2RB/CCND2/TLR7/IL18R1/IRF8/CD48/TNFRSF4/TNFSF11/FLT3LG/CXCL10/SLC2A3/GATA1/SELL/GBP4/IL10RA/RGS16/SYT11/FGL2/CD79B/IKZF2/WLS/F2RL2/PTGER2/LIF/COL6A1/SPP1/GLIPR2/TRAF1/GALM/TGM2/IL4R/ECM1/TNFRSF1B/CD83/RORA/PIM1/TNFSF10/GADD45B/MYO1E/MAP6/NRP1/ITGAE/SERPINC1/PL…	BRCA
HALLMARK_COMPLEMENT	HALLMARK_COMPLEMENT	200	0.549494	1.6205	0.012987	0.0735294	0.0588235	4383	tags=46%, list=22%, signal=36%	MMP13/CR2/PCSK9/ZFPM2/KLK1/KYNU/SERPINB2/ITIH1/CASP5/GZMB/DPP4/S100A12/CR1/HPCAL4/CD40LG/GZMK/PIK3CG/MT3/PHEX/CFH/LCK/MMP12/GZMA/OLR1/F5/GNGT2/C2/APOBEC3G/PLAUR/ZEB1/C1S/PIK3R5/LCP2/S100A9/GP1BA/ITGAM/PLEK/FN1/GNG2/SPOCK2/LRP1/FCN1/PLA2G7/ERAP2/C1R/CCL5/PSMB9/WAS/CASP1/CASP10/DOCK10/SERPINE1/FYN/SERPING1/MMP14/TIMP2/APOA4/CD55/CDA/IRF1/CFB/FCER1G/CTSS/CASP4/CP/TNFAIP3/SERPINA1/C3/ACTN2/APOC1/C9/C…	BRCA
HALLMARK_KRAS_SIGNALING_UP	HALLMARK_KRAS_SIGNALING_UP	198	0.502721	1.47434	0.0131579	0.0735294	0.0588235	4477	tags=47%, list=23%, signal=37%	NR1H4/WNT7A/CFHR2/HOXD11/MMP10/CSF2/ANXA10/F13A1/SPON1/ITGBL1/TMEM158/TLR8/PRKG2/INHBA/PDCD1LG2/MMP11/GABRA3/GFPT2/HKDC1/ADAMDEC1/PRRX1/EPHB2/IKZF1/PLAU/PRDM1/CFH/ETV1/DOCK2/IL7R/HSD11B1/IL2RG/CCND2/IRF8/MMP9/PLAUR/MAP4K1/RETN/CD37/AKAP12/CXCL10/CLEC4A/ADAM8/IL10RA/LY96/RGS16/SCG5/ITGB2/C3AR1/LIF/F2RL1/CSF2RA/BIRC3/IL1B/SPP1/LAT2/GPNMB/TMEM176A/IGFBP3/TRAF1/MAFB/CFB/TMEM176B/CMKLR1/FCER1G/CTSS/IG…	BRCA
HALLMARK_APOPTOSIS	HALLMARK_APOPTOSIS	160	0.488921	1.40669	0.0266667	0.121212	0.0969697	5388	tags=44%, list=27%, signal=32%	FASLG/FEZ1/CD38/IFNB1/IL1A/DCN/PRF1/TIMP3/CD69/CD2/CCND2/MMP2/TGFB2/LUM/FAS/HGF/IL18/DPYD/CASP1/IGFBP6/BIRC3/TIMP2/IL1B/PLCB2/PDGFRB/IRF1/LEF1/ATF3/CASP4/TNFRSF12A/ANXA1/BGN/AVPR1A/ANKH/F2R/ISG20/TAP1/TNF/TNFSF10/GADD45B/LGALS3/HMOX1/NEDD9/RNASEL/EMP1/GCH1/CASP7/BMP2/CYLD/IFITM3/PLPPR4/SC5D/CAV1/CCNA1/NEFH/CDKN1A/SLC20A1/IL6/CD14/GADD45A/SAT1/PLAT/CASP8/SOD2/TIMP1/IFNGR1/GNA15/HSPB1/GSN/ERBB2/GPX3	BRCA
HALLMARK_E2F_TARGETS	HALLMARK_E2F_TARGETS	198	-0.423393	-1.35691	0.0384615	0.160256	0.128205	9048	tags=70%, list=46%, signal=38%	MELK/NOLC1/TRA2B/BRMS1L/CSE1L/NUP107/LMNB1/SMC1A/DDX39A/RFC2/SLBP/HNRNPD/RNASEH2A/CDC25B/DONSON/RAD1/STAG1/DEK/CNOT9/RAD21/RANBP1/MCM3/SUV39H1/NAA38/HMGA1/NUDT21/BARD1/ANP32E/MRE11/CDKN1B/KIF22/DCLRE1B/NASP/DCK/SSRP1/POLD2/RAD51C/POP7/DUT/IPO7/PNN/MCM4/RPA1/MTHFD2/RFC1/GINS1/CCNE1/PPM1D/RAD50/MCM2/TBRG4/SMC3/MKI67/PRKDC/MCM5/CBX5/ORC2/SPAG5/RACGAP1/DNMT1/POLA2/POLD1/BIRC5/TOP2A/AURKA/ASF1B/STMN1/…	BRCA
HALLMARK_EPITHELIAL_MESENCHYMAL_TRANSITION	HALLMARK_EPITHELIAL_MESENCHYMAL_TRANSITION	198	0.704064	1.97303	0.016129	0.163934	0.141501	3830	tags=65%, list=20%, signal=53%	LRRC15/COL11A1/MFAP5/TIMP3/NTM/GREM1/FAP/COMP/INHBA/POSTN/ADAM12/PTX3/FBN1/RGS4/CDH11/SPOCK1/VCAM1/FN1/VCAN/ABI3BP/MYLK/CXCL12/DPYSL3/NID2/VEGFC/ITGB3/EDIL3/SGCD/THBS2/SFRP4/CDH2/COL5A3/SLIT3/COL5A1/DCN/THBS1/SERPINE1/MATN3/COL12A1/GAS1/SERPINE2/PRRX1/FOXC2/PTHLH/GLIPR1/NT5E/ECM1/FGF2/FSTL3/COL6A3/TAGLN/THY1/COL5A2/TFPI2/CTHRC1/FERMT2/NNMT/COL8A2/FBLN2/MMP2/SCG2/IL6/DAB2/AREG/PCOLCE2/CALD1/ITGA5/…	CESC
HALLMARK_ALLOGRAFT_REJECTION	HALLMARK_ALLOGRAFT_REJECTION	196	0.619627	1.74145	0.016129	0.163934	0.141501	4805	tags=55%, list=24%, signal=42%	IL2/IL9/INHBA/EREG/KRT1/NLRP3/IL11/FCGR2B/CCL11/CD80/CD28/CCL22/BCAT1/IL10/IL12B/CCL19/CCL13/LY86/PRKCB/IL2RA/MMP9/TRAT1/THY1/CD40LG/CD86/PF4/ITK/CFP/TGFB2/IL6/FYB1/CD1D/IL16/CXCL13/CCR2/IL1B/IGSF6/CRTAM/GPR65/F2R/FGR/CD79A/IRF8/SPI1/ITGB2/CD4/CCL7/IFNG/IL18/SIT1/CXCL9/CCL4/STAB1/IL12RB1/CCL2/LTB/CCR5/CD40/LCP2/RPL3L/ITGAL/WAS/CD3G/IL13/C2/PTPRC/STAT4/CD2/CD3D/ICAM1/IRF4/CCR1/NCF4/CSF1/CXCR3/HLA-…	CESC
HALLMARK_MYOGENESIS	HALLMARK_MYOGENESIS	199	0.576829	1.62768	0.015873	0.163934	0.141501	3966	tags=42%, list=20%, signal=34%	MYH2/MYH1/MYL2/MYH4/MYL1/MYOG/MYH8/MYL7/ACTC1/PVALB/CACNG1/MYL3/CASQ2/SGCA/DES/ADAM12/PTGIS/CDH13/CD36/HSPB2/FHL1/MYLK/GJA5/SGCD/DMD/CASQ1/FXYD1/FST/MYH11/MYL4/KCNH1/FGF2/MYBPC3/COL6A3/TAGLN/PPP1R3C/ACTA1/COX7A1/ANKRD2/NCAM1/AEBP1/MYLPF/SORBS1/MEF2C/SGCG/COL6A2/LDB3/PKIA/LAMA2/CKM/COL3A1/CRYAB/SSPN/APOD/COL15A1/COL1A1/CLU/MYF6/EPHB3/FABP3/APLNR/SCHIP1/KIFC3/ITGB5/SPARC/SPEG/TNNT2/SPHK1/RYR1/MRAS/…	CESC
HALLMARK_TNFA_SIGNALING_VIA_NFKB	HALLMARK_TNFA_SIGNALING_VIA_NFKB	199	0.567038	1.60006	0.015873	0.163934	0.141501	5265	tags=51%, list=27%, signal=38%	INHBA/PTX3/GFPT2/CSF2/TNFAIP6/MSC/OLR1/CD80/TNFSF9/IL7R/TNFRSF9/NR4A3/EGR3/SERPINE1/IL12B/IL1A/SLC2A3/EGR2/GPR183/BCL2A1/IL6/AREG/IL1B/SERPINB2/GEM/TNC/IL18/G0S2/PMEPA1/CCL4/CCL2/PLAU/PLEK/EDN1/PLK2/CCND1/CD69/SPHK1/SLC2A6/CCRL2/FOSB/F3/DUSP2/IER5/ICAM1/GADD45A/FJX1/KLF2/PTGER4/FOSL1/CSF1/CXCL11/HBEGF/TUBB2A/GADD45B/PTPRE/CD83/SERPINB8/TNFAIP3/DUSP4/DUSP5/TRAF1/PDE4B/PHLDA1/MXD1/IL23A/SPSB1/CXCL1…	CESC
HALLMARK_IL6_JAK_STAT3_SIGNALING	HALLMARK_IL6_JAK_STAT3_SIGNALING	87	0.56079	1.38601	0.0163934	0.163934	0.141501	4585	tags=48%, list=23%, signal=37%	DNTT/CD36/CSF2/ITGB3/EBI3/IL9R/IL2RA/PLA2G2A/PF4/CSF2RB/CRLF2/ITGA4/IL1R2/IL6/CXCL13/PIK3R5/IL1B/CCL7/CXCL9/IL12RB1/LTB/ACVRL1/IL1R1/CCR1/CD14/CSF1/CXCL11/CSF2RA/A2M/HMOX1/TNFRSF1B/SOCS1/IL2RG/TNFRSF12A/PIM1/CXCL10/PDGFC/TGFB1/TNF/REG1A/SOCS3/CD38	CESC
HALLMARK_DNA_REPAIR	HALLMARK_DNA_REPAIR	148	-0.557282	-1.52648	0.0263158	0.201613	0.174024	3	tags=1%, list=0%, signal=1%	POLR2F/BOLA2	CESC
HALLMARK_IL2_STAT5_SIGNALING	HALLMARK_IL2_STAT5_SIGNALING	198	0.503763	1.41172	0.0322581	0.201613	0.174024	4563	tags=40%, list=23%, signal=31%	TNFRSF8/GATA1/CSF2/CCR4/ADAM19/SELP/HOPX/TNFRSF9/PTH1R/IL1RL1/IL10/ICOS/SLC2A3/NT5E/ECM1/IL2RA/TNFSF11/CD79B/TLR7/CD86/CTLA4/PENK/TNFRSF4/IL1R2/FGL2/EOMES/GPR65/CD48/RORA/IRF8/RGS16/PTGER2/BATF3/MAP6/LRRC8C/F2RL2/IL10RA/CST7/SPP1/COL6A1/APLP1/LTB/BATF/SELL/RHOH/IL13/IRF4/CSF1/ETV4/TGM2/SMPDL3A/SYT11/PLAGL1/GADD45B/CD83/SPRY4/EMP1/CDKN1C/SOCS2/TRAF1/GLIPR2/TNFRSF1B/ST3GAL4/SOCS1/PHLDA1/MXD1/SERPIN…	CESC
HALLMARK_INFLAMMATORY_RESPONSE	HALLMARK_INFLAMMATORY_RESPONSE	200	0.501882	1.4103	0.031746	0.201613	0.174024	4236	tags=46%, list=22%, signal=37%	NPFFR2/TACR3/CD70/INHBA/EREG/SELE/ROS1/NLRP3/MARCO/TNFAIP6/OLR1/PTGIR/TNFSF9/ITGB3/IL7R/CCL22/TNFRSF9/PDPN/CCL17/SERPINE1/CLEC5A/HAS2/CCR7/IL10/EBI3/IL12B/IL1A/GPR183/ADGRE1/LTA/AXL/CMKLR1/SCN1B/SLC31A2/NOD2/SLAMF1/C3AR1/FPR1/IL6/MSR1/ITGA5/PIK3R5/AQP9/IL1B/CSF3/GPR132/RGS1/CD48/RGS16/PTGER2/CYBB/OSM/MEFV/CCL24/IL10RA/CCL7/KCNA3/EMP3/IL18/CXCL9/STAB1/CCL2/P2RX7/EDN1/APLNR/CD40/LCP2/SELL/CD69/PTAF…	CESC
HALLMARK_PANCREAS_BETA_CELLS	HALLMARK_PANCREAS_BETA_CELLS	40	-0.817036	-1.98383	0.037037	0.205761	0.177605	1552	tags=45%, list=8%, signal=42%	PDX1/PAX6/CHGA/NKX6-1/NEUROG3/G6PC2/IAPP/DCX/FOXA2/SST/ABCC8/HNF1A/SLC2A2/INS/SCGN/NEUROD1/GCG/PAX4	CESC
HALLMARK_ALLOGRAFT_REJECTION	HALLMARK_ALLOGRAFT_REJECTION	196	0.621022	1.64451	0.0133333	0.0844595	0.0729018	3505	tags=51%, list=18%, signal=42%	KRT1/IL9/IFNG/CCL7/CCL13/TRAT1/CRTAM/CXCL13/FASLG/CD28/TNF/CD40LG/NCR1/ITK/IRF4/EREG/IL2RA/SIT1/IL12B/CCL11/BCAT1/PRKCB/CXCR3/CD96/IL16/IL12A/IL12RB1/CD79A/CD80/CCR2/IL2RB/FCGR2B/CCR5/NLRP3/CD8B/PTPRC/IL10/LCK/GPR65/CCL19/FYB1/IL2RG/KLRD1/CCL22/INHBA/GCNT1/IL2/TLR6/IL18RAP/JAK2/ZAP70/MAP4K1/CD3E/CD86/ST8SIA4/CCL4/CCR1/CD8A/CD247/CD2/IL7/HDAC9/PRF1/CXCL9/HLA-DQA1/IL6/ITGAL/ITGB2/HLA-DOB/LCP2/FGR/C…	CHOL
HALLMARK_EPITHELIAL_MESENCHYMAL_TRANSITION	HALLMARK_EPITHELIAL_MESENCHYMAL_TRANSITION	198	0.601406	1.59225	0.0133333	0.0844595	0.0729018	4971	tags=55%, list=25%, signal=42%	MFAP5/SFRP1/COL11A1/TIMP3/PRRX1/FBN2/SGCD/GREM1/FAP/ITGB3/CDH11/SPOCK1/VCAM1/LRRC15/GAS1/PRSS2/NTM/INHBA/GLIPR1/SFRP4/COL8A2/COMP/EDIL3/PTX3/ABI3BP/TFPI2/ADAM12/VCAN/PDLIM4/DPYSL3/LAMA2/SLIT2/IL6/LOX/WIPF1/MXRA5/VEGFC/FBLN2/FOXC2/CTHRC1/OXTR/FBN1/ELN/SNAI2/DCN/BASP1/LAMA3/LOXL1/SCG2/COL6A3/MYLK/ECM2/CD44/ITGA2/FGF2/COL12A1/THBS2/TNFAIP3/MATN3/POSTN/LUM/IL15/TGFB1/GEM/FSTL1/IGFBP3/FBLN5/PMP22/NID2…	CHOL
HALLMARK_INTERFERON_GAMMA_RESPONSE	HALLMARK_INTERFERON_GAMMA_RESPONSE	198	0.582874	1.54319	0.0133333	0.0844595	0.0729018	6277	tags=58%, list=32%, signal=40%	CCL7/GPR18/IDO1/KLRK1/IRF4/CSF2RB/IL2RB/VCAM1/IFI44L/ITGB7/CD69/BANK1/CXCL11/CD38/ZBP1/SAMD9L/CMKLR1/SLAMF7/JAK2/P2RY14/IL10RA/FCGR1A/CD86/ST8SIA4/SELP/GBP6/MX2/CIITA/GBP4/IL7/CD274/CXCL9/HLA-DQA1/IL6/AUTS2/XCL1/RSAD2/LCP2/SSPN/XAF1/FGL2/EPSTI1/CXCL10/DDX60/IRF8/OAS2/CASP1/FPR1/CCL5/TNFAIP3/ARID5B/IL15/ST3GAL5/IFI44/PLA2G4A/SP110/GZMA/CMPK2/RAPGEF6/IFNAR2/MX1/DDX58/OASL/IL18BP/SOCS1/ICAM1/SOCS3/O…	CHOL
HALLMARK_INFLAMMATORY_RESPONSE	HALLMARK_INFLAMMATORY_RESPONSE	200	0.563722	1.49362	0.0135135	0.0844595	0.0729018	4687	tags=56%, list=24%, signal=43%	TACR3/NPFFR2/NDP/TNFRSF9/CD70/CCL7/ADGRE1/PTGER2/CXCR6/EREG/IL12B/CCR7/SLAMF1/KCNA3/IL7R/MARCO/ITGB3/LTA/NOD2/IL2RB/TACR1/LPAR1/NLRP3/CD69/IL10/LCK/CXCL11/PIK3R5/PTGER4/CCL22/INHBA/CCL17/EBI3/CMKLR1/IL18RAP/CD48/IL10RA/PDPN/OLR1/PCDH7/GPR183/HAS2/SPHK1/IL18R1/IRAK2/RASGRP1/CXCL9/CYBB/GPR132/LAMP3/IL6/CCRL2/LCP2/SLC1A2/VIP/C3AR1/GNA15/MSR1/CHST2/GP1BA/SLC31A2/HRH1/CXCL10/CLEC5A/OSMR/KCNMB2/PTPRE/R…	CHOL
HALLMARK_KRAS_SIGNALING_UP	HALLMARK_KRAS_SIGNALING_UP	198	0.539638	1.42872	0.0133333	0.0844595	0.0729018	4248	tags=46%, list=22%, signal=36%	CIDEA/WNT7A/HOXD11/PDCD1LG2/RELN/TLR8/ADAMDEC1/TMEM100/KCNN4/PRRX1/EREG/GFPT2/IL7R/ITGBL1/DOCK2/CSF2/MALL/SATB1/ALDH1A3/IL2RG/INHBA/APOD/EPHB2/CMKLR1/MAP4K1/IL10RA/TMEM158/IKZF1/F13A1/HDAC9/ADAM8/ITGB2/EPB41L3/CD37/C3AR1/IL33/ABCB1/NAP1L2/PLAT/CLEC4A/CXCL10/CSF2RA/ANO1/PEG3/PLAU/GPNMB/PRDM1/LCP1/VWA5A/GABRA3/IRF8/ADGRA2/ITGA2/MAFB/NIN/ETS1/TNFAIP3/ANXA10/MYCN/BIRC3/RGS16/CBL/TRIB2/EMP1/HSD11B1/LY…	CHOL
HALLMARK_TNFA_SIGNALING_VIA_NFKB	HALLMARK_TNFA_SIGNALING_VIA_NFKB	199	0.538078	1.42738	0.0133333	0.0844595	0.0729018	6316	tags=55%, list=32%, signal=38%	TNFRSF9/TNF/GFPT2/IL12B/IL7R/CSF2/CD80/SERPINB2/CD69/CXCL11/EGR3/PTGER4/INHBA/MSC/PTX3/CCL4/OLR1/GPR183/SPHK1/PLEK/DUSP2/EGR2/BCL2A1/IL6/CCRL2/SLC16A6/REL/CXCL10/CD83/PLAU/PTPRE/CD44/FOSL1/MAP3K8/CCL5/TNFAIP3/TLR2/SIK1/SLC2A3/BIRC3/NFAT5/FOSB/ICOSLG/GEM/IL23A/STAT5A/TNFAIP8/EDN1/TRAF1/KLF2/PLAUR/EGR1/CSF1/DENND5A/KLF9/HBEGF/AREG/KLF4/DDX58/SERPINE1/PANX1/TNFSF9/TIPARP/IL6ST/ICAM1/SOCS3/PHLDA1/LDL…	CHOL
HALLMARK_KRAS_SIGNALING_DN	HALLMARK_KRAS_SIGNALING_DN	198	0.526077	1.39282	0.0133333	0.0844595	0.0729018	2952	tags=33%, list=15%, signal=29%	EPHA5/CALML5/PAX4/TFAP2B/CLPS/DCC/KRT1/KRT13/VPREB1/TENM2/CPB1/CPA2/ARPP21/COL2A1/SLC12A3/KRT4/TSHB/SLC5A5/IFNG/SMPX/TCL1A/PAX3/SIDT1/CCR8/CD40LG/PNMT/IL12B/LGALS7/SCN10A/NUDT11/ATP4A/CD80/NPHS1/IFI44L/NOS1/SERPINB2/CLDN8/RYR1/CACNG1/IRS4/SCGB1A1/SLC6A14/WNT16/EGF/PDCD1/NPY4R/HTR1B/TGM1/EDAR/GDNF/P2RY4/RSAD2/KRT15/KCNMB1/CHST2/AMBN/NTF3/GP1BA/PKP1/TEX15/UGT2B17/CD207/CAMK1D/IL5/SSTR4/CCNA1	CHOL
HALLMARK_IL2_STAT5_SIGNALING	HALLMARK_IL2_STAT5_SIGNALING	198	0.52073	1.37866	0.0133333	0.0844595	0.0729018	4674	tags=41%, list=24%, signal=32%	PENK/TNFRSF9/ICOS/EOMES/PTGER2/CCR4/IRF4/IL2RA/RHOH/CSF2/TIAM1/IL2RB/TLR7/IKZF2/HOPX/IL10/GPR65/CTLA4/LRRC8C/PLAGL1/CD79B/CD48/ADAM19/IL10RA/CD86/SELP/IL1RL1/GBP4/IL18R1/HK2/F2RL2/FGL2/IGF1R/CST7/GATA1/ABCB1/CXCL10/CD83/FLT3LG/TNFRSF4/TNFRSF18/GLIPR2/IRF8/PTCH1/CD44/PRKCH/MAP3K8/ITIH5/SLC2A3/SYT11/RGS16/RRAGD/BATF3/EMP1/LTB/DRC1/NRP1/CCND2/SHE/CDCP1/SWAP70/RABGAP1L/COCH/TRAF1/SELL/PHTF2/CSF1/DENN…	CHOL
HALLMARK_OXIDATIVE_PHOSPHORYLATION	HALLMARK_OXIDATIVE_PHOSPHORYLATION	185	-0.495337	-1.39241	0.0333333	0.185185	0.159844	6093	tags=61%, list=31%, signal=43%	NDUFB7/IMMT/HADHA/ATP6V0B/COX15/IDH3G/NDUFS1/NDUFA2/NDUFB4/TOMM22/COX7C/COX8A/HSD17B10/TIMM17A/COX5B/PDHX/UQCRH/LDHB/TIMM8B/NDUFAB1/MRPS22/POR/NDUFA8/ETFDH/NDUFB3/DLD/SDHC/COX4I1/PMPCA/DECR1/ACADM/MDH2/MGST3/SLC25A3/COX6C/NDUFB5/UQCRC1/NDUFS2/COX7A2/NDUFA1/HADHB/COX6B1/SUCLG1/SDHB/IDH2/GOT2/UQCR10/NDUFV1/MTRF1/UQCRFS1/NDUFS8/TIMM13/NDUFS3/CYC1/BAX/TIMM50/UQCR11/ISCU/NDUFA4/FDX1/PRDX3/ATP1B1/ACADS…	CHOL
HALLMARK_EPITHELIAL_MESENCHYMAL_TRANSITION	HALLMARK_EPITHELIAL_MESENCHYMAL_TRANSITION	198	0.632213	1.31272	0.00990099	0.334158	0.320479	5557	tags=65%, list=28%, signal=47%	SGCG/SFRP1/PCOLCE2/GAS1/DKK1/SLIT2/COMP/CDH2/MATN3/MFAP5/PTHLH/SPOCK1/NTM/ECM2/ADAM12/APLP1/FAP/COL11A1/SFRP4/PRRX1/FOXC2/SLIT3/COL8A2/CADM1/LAMA2/SCG2/SGCD/FGF2/FBLN2/PTX3/SPP1/RGS4/THBS2/GREM1/PRSS2/LRRC15/TIMP3/BDNF/CDH11/LOXL1/ABI3BP/VEGFC/FBN1/INHBA/LOX/CTHRC1/FERMT2/DCN/MGP/CRLF1/VCAM1/DPYSL3/ENO2/FAS/POSTN/FSTL3/MXRA5/VCAN/PDLIM4/MYLK/GLIPR1/NNMT/FBLN1/EFEMP2/FBLN5/BASP1/TNC/NID2/EMP3/TAGL…	COAD
HALLMARK_MYOGENESIS	HALLMARK_MYOGENESIS	199	0.600507	1.249	0.029703	0.334158	0.320479	5255	tags=45%, list=27%, signal=33%	MYL1/MYOG/MYF6/COX6A2/MYL7/IGF1/MYH2/SGCG/PVALB/ACTN3/NOS1/MYL2/CASQ2/TNNT3/SLN/ACTC1/TNNT1/CAV3/CAMK2B/MYH8/ANKRD2/PTGIS/FST/SGCA/CASQ1/MYH7/TNNI2/ADAM12/HSPB2/CACNG1/GNAO1/PYGM/LDB3/SPEG/MYBPH/ACTN2/MRAS/CD36/PPP1R3C/LAMA2/SCHIP1/SGCD/FGF2/APOD/HSPB8/EFS/FXYD1/MYOM1/SPHK1/DES/SSPN/MAPK12/MYL4/CFD/CRYAB/MYOZ1/MYH1/RYR1/FHL1/MYH11/LSP1/PPFIA4/MYLK/CSRP3/GPX3/COX7A1/AEBP1/GJA5/MYL3/CHRNB1/TAGLN/WW…	COAD
HALLMARK_INFLAMMATORY_RESPONSE	HALLMARK_INFLAMMATORY_RESPONSE	200	0.597282	1.24248	0.029703	0.334158	0.320479	5503	tags=54%, list=28%, signal=39%	MARCO/CD70/TACR1/CCL7/OLR1/CLEC5A/TNFSF9/MSR1/PCDH7/CCL17/P2RX7/OPRK1/AQP9/SLC7A2/NDP/KCNA3/SLC1A2/IL12B/TNFRSF9/TNFAIP6/FPR1/PIK3R5/PTAFR/SLC31A2/ADGRE1/IL10/RASGRP1/CMKLR1/NLRP3/SPHK1/LTA/PTGIR/IL10RA/IL1A/C3AR1/TLR1/CD48/CSF3R/OSM/C5AR1/MEFV/INHBA/VIP/PTGER2/SLC28A2/SCN1B/RNF144B/CCR7/SELL/CYBB/CD69/CCL22/IL2RB/EBI3/CCL2/SLAMF1/CXCL11/CXCR6/IL1R1/OSMR/CXCL9/LCP2/EMP3/CHST2/GPR183/AXL/LCK/GPR13…	COAD
HALLMARK_ALLOGRAFT_REJECTION	HALLMARK_ALLOGRAFT_REJECTION	196	0.596249	1.2383	0.029703	0.334158	0.320479	5700	tags=56%, list=29%, signal=40%	KRT1/FCGR2B/CCL7/MBL2/IL13/CRTAM/CARTPT/CCR2/KLRD1/ELANE/BCAT1/CCL13/IL12B/NCR1/CD86/CCL19/TLR6/CD80/IL10/LY86/IL2/TRAT1/NLRP3/CD28/CCR5/FGR/PRKCB/IL16/CXCL13/TLR1/ITGB2/FASLG/HDAC9/PRKCG/HLA-DQA1/ITK/IRF4/IL2RA/HLA-DOA/INHBA/ST8SIA4/CD8A/GPR65/CD96/CCL4/IGSF6/PTPRC/IL12RB1/ITGAL/FAS/HLA-DMB/CCR1/FYB1/WAS/SPI1/CD8B/MMP9/CD7/CD247/CCL22/IL2RB/CCL2/TGFB2/MAP4K1/CD79A/CXCL9/LCP2/IFNG/CD3D/HCLS1/LCK/…	COAD
HALLMARK_PANCREAS_BETA_CELLS	HALLMARK_PANCREAS_BETA_CELLS	40	-0.816202	-2.12268	0.025	0.260417	0.230263	1378	tags=50%, list=7%, signal=47%	PCSK2/G6PC2/ISL1/PAK3/NKX2-2/ABCC8/INS/SYT13/FOXA2/SLC2A2/NEUROG3/GCG/HNF1A/CHGA/PDX1/INSM1/PAX4/NEUROD1/SCGN/SST	ESCA
HALLMARK_XENOBIOTIC_METABOLISM	HALLMARK_XENOBIOTIC_METABOLISM	196	-0.505118	-1.65907	0.04	0.260417	0.230263	2511	tags=24%, list=13%, signal=21%	ALDH2/IGF1/LEAP2/PAPSS2/GNMT/GSTM4/GCNT2/CYP2J2/FBP1/AOX1/ASL/LPIN2/SLC6A12/SLC46A3/GAD1/ABCC3/ITIH4/FMO3/CYP2C18/CCL25/HES6/ATOH8/IRF8/UPB1/F10/CFB/PDK4/ABCC2/VTN/CYP2E1/HSD17B2/CYP4F2/VNN1/RBP4/REG1A/TTPA/CYP17A1/GCKR/DDC/HNF4A/ADH1C/SERPINA6/FABP1/CRP/F11/IGFBP1/ITIH1	ESCA
HALLMARK_COAGULATION	HALLMARK_COAGULATION	138	-0.483335	-1.56099	0.0322581	0.260417	0.230263	1342	tags=29%, list=7%, signal=27%	C8G/CTSH/CLU/PECAM1/SERPINC1/CFI/VWF/CPB2/C2/MMP15/ITGB3/PROZ/DPP4/CPN1/ANG/PROC/SERPINA1/F2/CAPN5/KLKB1/RGN/F10/CFB/TMPRSS6/GDA/FGG/HPN/GP9/FGA/APOA1/APOC3/PF4/C8B/CTSE/HMGCS2/HNF4A/MEP1A/F11/C8A/ITIH1	ESCA
HALLMARK_EPITHELIAL_MESENCHYMAL_TRANSITION	HALLMARK_EPITHELIAL_MESENCHYMAL_TRANSITION	198	0.494322	1.46534	0.0128205	0.260417	0.230263	5010	tags=52%, list=26%, signal=39%	COL11A1/PTHLH/LAMA1/LRRC15/CRLF1/FOXC2/SPOCK1/GAS1/CDH2/NTM/FAP/ADAM12/SNAI2/MAGEE1/SLIT2/MFAP5/INHBA/TFPI2/COL8A2/SFRP1/FBN2/SGCG/COL7A1/TNC/PRRX1/PDLIM4/GJA1/BASP1/VEGFC/COL5A3/GPC1/SFRP4/SPP1/LOX/BDNF/CDH11/TGFBI/SERPINE2/POSTN/FSTL3/TGFB1/TIMP3/GPX7/CTHRC1/THBS2/MATN3/GREM1/CAP2/ENO2/SERPINE1/VCAN/COL5A1/EMP3/FN1/ECM1/COMP/GLIPR1/FBLN1/COL16A1/PTX3/RGS4/CD44/DPYSL3/BMP1/EFEMP2/PCOLCE2/LGALS1/…	ESCA
HALLMARK_BILE_ACID_METABOLISM	HALLMARK_BILE_ACID_METABOLISM	112	-0.472229	-1.43657	0.03125	0.260417	0.230263	3585	tags=31%, list=18%, signal=26%	PHYH/ABCD3/EPHX2/ABCD2/SLC22A18/PEX1/MLYCD/LCK/NUDT12/PEX11A/EFHC1/CYP27A1/SLC27A5/PECR/PIPOX/ABCA6/CYP7A1/GNMT/HSD17B11/ABCA9/ALDH1A1/ACSL5/ABCA8/SLC27A2/NR3C2/APOA1/SULT1B1/AGXT/NR1H4/TTR/SERPINA6/ABCG8/NR0B2/NR1I2/GC	ESCA
HALLMARK_PEROXISOME	HALLMARK_PEROXISOME	104	-0.471997	-1.42315	0.030303	0.260417	0.230263	2088	tags=23%, list=11%, signal=21%	SCGB1A1/ABCD3/EPHX2/ABCD2/MLYCD/SLC25A19/PEX11A/FABP6/HSD17B11/HSD11B2/ABCB1/ABCB4/STS/ALDH1A1/CRABP1/ACSL5/SLC27A2/UGT2B17/HAO2/ABCC8/ALB/TTR/SERPINA6/NR1I2	ESCA
HALLMARK_FATTY_ACID_METABOLISM	HALLMARK_FATTY_ACID_METABOLISM	155	-0.417623	-1.37609	0.03125	0.260417	0.230263	3407	tags=17%, list=17%, signal=15%	ENO3/BCKDHB/MLYCD/ACADS/MGLL/CD1D/INMT/AADAT/ACSS1/ACAA2/HSD17B11/CYP4A22/ALDH1A1/HPGD/ACSL5/CYP4A11/ACSM3/GAD2/HAO2/VNN1/CA4/HMGCS2/AQP7/ADH1C/FABP2/GPD1/FABP1	ESCA
HALLMARK_COMPLEMENT	HALLMARK_COMPLEMENT	200	-0.408827	-1.34751	0.0416667	0.260417	0.230263	3372	tags=22%, list=17%, signal=18%	IL6/LCK/PIK3R5/CTSH/CD55/CLU/SERPINC1/SPOCK2/GCA/CTSS/KLK1/LYN/ADRA2B/NOTCH4/CXCL1/C2/CPM/MMP15/PIK3CG/CR1/DPP4/CASP10/FCN1/ANG/CD40LG/PRSS3/SERPINA1/LTF/F2/CR2/KLKB1/F10/CFB/TMPRSS6/CP/CASP5/SCG3/GP9/F7/F5/C4BPB/HNF4A/APOA4/ITIH1	ESCA
HALLMARK_TNFA_SIGNALING_VIA_NFKB	HALLMARK_TNFA_SIGNALING_VIA_NFKB	199	0.609028	1.71362	0.0238095	0.3125	0.302632	4932	tags=59%, list=25%, signal=44%	CXCL6/CSF2/IL1A/CCL20/TNF/KYNU/IL7R/TNFSF9/CLCF1/TNFRSF9/CD80/LIF/CXCL3/CXCL1/FOSL1/IL6/BIRC3/SERPINB2/BCL2A1/ZC3H12A/CCL4/CCRL2/SERPINE1/SLC16A6/PLAUR/IER3/CXCL2/MAP3K8/FOSB/ICAM1/PTGS2/BCL3/PTX3/PHLDA2/BHLHE40/IL18/EGR2/AREG/IL1B/CD69/EGR3/TLR2/GFPT2/LDLR/DUSP2/IL15RA/PLEK/SPHK1/SOCS3/TNFAIP2/SDC4/F3/GPR183/CEBPB/INHBA/PLAU/B4GALT1/NAMPT/CD44/RCAN1/MAFF/TNFAIP8/RELB/ICOSLG/OLR1/CCL2/ABCA1/LAMB3…	GBM
HALLMARK_INFLAMMATORY_RESPONSE	HALLMARK_INFLAMMATORY_RESPONSE	200	0.612614	1.71024	0.025	0.3125	0.302632	3635	tags=57%, list=19%, signal=47%	EREG/ROS1/CXCL6/P2RY2/CCL7/HPN/OPRK1/AQP9/BDKRB1/IL10/IL1A/CD70/MARCO/SGMS2/SLC31A2/CCL20/ITGB3/ADGRE1/IL18RAP/IL7R/TNFSF9/IL15/MET/IL18R1/TNFRSF9/PTGER2/OSM/CLEC5A/LIF/NPFFR2/IL6/FPR1/SCN1B/CCRL2/SERPINE1/PLAUR/HRH1/CSF3R/GPR132/GNA15/IL10RA/LAMP3/FFAR2/C5AR1/MSR1/ICAM1/PIK3R5/NOD2/CD55/MEFV/SELE/IRAK2/CCR7/IL18/ADORA2B/GP1BA/OSMR/DCBLD2/IL1B/RGS1/CD69/CXCL8/STAB1/TLR2/CD40/ADM/LDLR/PTAFR/TLR1/I…	GBM
HALLMARK_DNA_REPAIR	HALLMARK_DNA_REPAIR	148	0.586444	1.51442	0.0238095	0.3125	0.302632	6	tags=1%, list=0%, signal=1%	BOLA2	GBM
HALLMARK_COMPLEMENT	HALLMARK_COMPLEMENT	200	0.513111	1.43246	0.025	0.3125	0.302632	4486	tags=50%, list=23%, signal=39%	HNF4A/MMP12/ITIH1/CR1/MMP8/TFPI2/S100A12/KYNU/FCN1/CFB/LTF/CXCL1/PIK3CG/IL6/GP9/SERPINB2/DPP4/C2/ADRA2B/SERPINE1/MMP13/PLAUR/ANG/LGALS3/ITGAM/C4BPB/PRSS3/S100A9/CD36/CTSC/PIK3R5/CD55/CP/PCSK9/S100A13/GNGT2/GP1BA/GZMB/SPOCK2/CASP1/SERPINA1/CASP10/PLEK/C1R/F3/RASGRP1/PRSS36/CEBPB/WAS/C1S/APOBEC3F/PDP1/MAFF/OLR1/ERAP2/CASP4/KLK1/TIMP1/PIM1/CSRP1/APOBEC3G/C3/PRKCD/CASP7/CASP5/CTSS/IRF1/LCK/LCP2/LYN/C…	GBM
HALLMARK_PANCREAS_BETA_CELLS	HALLMARK_PANCREAS_BETA_CELLS	40	-0.672493	-1.52951	0.021978	0.989011	0.989011	1555	tags=32%, list=8%, signal=30%	PAX6/G6PC2/NEUROD1/DCX/ABCC8/ISL1/PCSK2/GCK/PAK3/HNF1A/SCGN/PAX4/INSM1	HNSC
HALLMARK_EPITHELIAL_MESENCHYMAL_TRANSITION	HALLMARK_EPITHELIAL_MESENCHYMAL_TRANSITION	198	0.588979	1.26568	0.00990099	0.435644	0.427306	6073	tags=55%, list=31%, signal=38%	COL11A1/LRRC15/MMP3/GREM1/COMP/ADAM12/IL6/COL7A1/MFAP5/SCG2/PTX3/FAP/FBN2/SPOCK1/PRRX1/PRSS2/CXCL8/APLP1/NTM/OXTR/DCN/LUM/MATN3/CTHRC1/FMOD/PTHLH/LOXL1/RGS4/CXCL1/TGFBI/INHBA/COL5A1/COL16A1/PLAUR/WNT5A/TFPI2/COL6A3/COL8A2/CXCL6/POSTN/BASP1/MMP1/THBS2/LAMC2/ECM1/SFRP4/SERPINE1/COL1A1/FBLN1/MXRA5/MEST/DPYSL3/LOX/CD44/PCOLCE/COL5A2/SGCG/CDH11/GLIPR1/ITGB3/SGCD/FBN1/IGFBP2/COL1A2/VCAN/TNC/LOXL2/AREG/…	KIRC
HALLMARK_ALLOGRAFT_REJECTION	HALLMARK_ALLOGRAFT_REJECTION	196	0.566548	1.22017	0.029703	0.572917	0.561952	5983	tags=54%, list=30%, signal=38%	PRKCG/IL11/CCL7/IL6/CARTPT/EREG/CCL11/CCL13/F2/IL2RA/CXCL13/MMP9/IL4/CD79A/IL2/LIF/IL10/CD80/PF4/CCL19/IRF4/INHBA/IFNG/IL13/CD28/BCAT1/TLR6/FCGR2B/C2/ACHE/IL12A/IL1B/CRTAM/TRAT1/ITK/CD40LG/STAT4/CD96/MAP4K1/CD7/CCR1/NCF4/GCNT1/ZAP70/IL12RB1/ELANE/CXCR3/CD86/CDKN2A/CD3G/CD8B/LY75/IL18RAP/FYB1/SIT1/RPL3L/IL2RB/TLR2/WAS/CCL22/LTB/NLRP3/CD8A/CD3E/CCR5/LCK/GPR65/NCR1/CD3D/BCL3/IL27RA/STAB1/SOCS1/CCL4/…	KIRC
HALLMARK_INFLAMMATORY_RESPONSE	HALLMARK_INFLAMMATORY_RESPONSE	200	0.551476	1.18253	0.049505	0.572917	0.561952	6313	tags=59%, list=32%, signal=40%	ROS1/CCL7/NDP/IL6/NPFFR2/EREG/HAS2/MEP1A/CSF3/AQP9/CXCL8/OSM/F3/PDPN/LIF/IL10/SPHK1/MEFV/IL1A/PROK2/SLAMF1/ADGRE1/BDKRB1/CCL24/INHBA/PLAUR/PCDH7/MARCO/CXCL6/CCR7/LTA/CCL20/BEST1/SERPINE1/CXCR6/IL1B/PTGER2/TNFRSF9/NOD2/P2RY2/DCBLD2/FPR1/KCNA3/GNA15/LAMP3/IL7R/ADORA2B/HRH1/CSF3R/GPR132/CD70/ITGB3/GPR183/CD82/CLEC5A/CD69/SELL/GABBR1/C5AR1/EBI3/TNFSF9/IL18RAP/IL2RB/RGS1/TLR2/CCL22/CMKLR1/PIK3R5/NLRP3…	KIRC
HALLMARK_KRAS_SIGNALING_DN	HALLMARK_KRAS_SIGNALING_DN	198	0.624551	1.17428	0.019802	0.831683	0.831683	4343	tags=44%, list=22%, signal=35%	PAX4/TFF2/SPRR3/KLK8/ABCB11/KRT13/CALML5/KLK7/KRT4/IFNG/NPY4R/DCC/TLX1/PROP1/CYP11B2/CCR8/SLC5A5/KRT5/ATP4A/CACNG1/SMPX/RYR2/VPREB1/CKM/FSHB/TCL1A/BRDT/SLC6A14/SLC6A3/PAX3/P2RX6/WNT16/KLHDC8A/KRT15/SHOX2/IL12B/SLC30A3/TEX15/PKP1/IRS4/CLPS/UGT2B17/ITIH3/GDNF/AMBN/LGALS7/SCN10A/PDCD1/CAPN9/PTGFR/FGF16/LYPD3/CHRNG/CD80/NUDT11/HTR1D/CPA2/TGFB2/GPR19/MYH7/NPHS1/ITGB1BP2/KRT1/PLAG1/MEFV/TENM2/NTF3/KCND…	KIRP
HALLMARK_INTERFERON_GAMMA_RESPONSE	HALLMARK_INTERFERON_GAMMA_RESPONSE	198	-0.619625	-1.56638	0.0147059	0.189394	0.167464	4412	tags=49%, list=22%, signal=38%	ICAM1/IFIT1/TNFAIP3/IRF7/FAS/XCL1/C1S/ISG15/IRF1/CD74/USP18/PLA2G4A/IRF4/RTP4/HLA-DRB1/IL7/DDX60/OAS3/CASP7/HLA-G/CCL5/NLRC5/IFI44/FCGR1A/SOCS1/SP110/HLA-DMA/PARP12/LCP2/MX1/ST8SIA4/APOL6/SOD2/C1R/CCL7/XAF1/SECTM1/OAS2/IRF5/CCL2/CASP1/GBP4/PTGS2/PARP14/CD274/IFIH1/CMPK2/NOD1/HERC6/CD40/PLSCR1/MYD88/SERPING1/IL15/IRF8/PTPN6/FGL2/NMI/ITGB7/UPP1/SAMD9L/VCAM1/RSAD2/GCH1/STAT4/CASP8/EPSTI1/CASP4/IFI44…	LGG
HALLMARK_ALLOGRAFT_REJECTION	HALLMARK_ALLOGRAFT_REJECTION	196	-0.608489	-1.52417	0.0151515	0.189394	0.167464	4526	tags=57%, list=23%, signal=44%	PRKCG/BCL3/BCL10/CCL4/ICAM1/BRCA1/IRF7/FAS/CD74/F2/IRF4/IL7/NCF4/HLA-DRA/INHBA/WAS/EREG/LYN/HLA-DOB/TGFB1/HLA-G/CCL5/LY86/SOCS1/DYRK3/HLA-DMA/LCP2/CTSS/IGSF6/ST8SIA4/ZAP70/IL2/CCL7/GBP2/PRF1/MAP4K1/SPI1/ITGB2/IL11/CCL2/CD40/TIMP1/IL15/CCR1/IRF8/PTPN6/FYB1/CD1D/HCLS1/CCL22/STAT4/CAPG/HLA-DMB/IL12RB1/IL18/IL2RG/CD3D/CD86/CD3E/TLR3/TLR2/TNF/CD247/NLRP3/PTPRC/LY75/C2/CCL13/ITGAL/GCNT1/GZMB/HLA-DOA/LC…	LGG
HALLMARK_INFLAMMATORY_RESPONSE	HALLMARK_INFLAMMATORY_RESPONSE	200	-0.592053	-1.51198	0.0144928	0.189394	0.167464	4434	tags=54%, list=23%, signal=42%	ATP2B1/ICAM1/LPAR1/CD14/IRF7/CHST2/IRF1/IL18R1/RTP4/GNAI3/TNFRSF1B/INHBA/EBI3/AXL/MEFV/EREG/IRAK2/ITGB8/ITGA5/LYN/FFAR2/CCL5/MMP14/TNFSF15/CXCL8/LCP2/DCBLD2/SPHK1/C3AR1/CCL7/BDKRB1/RGS1/CYBB/CCL2/TPBG/CD40/IL1R1/NMUR1/TIMP1/IL15/KCNA3/NMI/FZD5/OSMR/HRH1/F3/CCL22/GCH1/OPRK1/CCR7/GNA15/IL18/CSF3R/PTGER4/PIK3R5/OLR1/CCRL2/TLR3/FPR1/TLR2/NPFFR2/PTAFR/SERPINE1/NLRP3/MET/IL10RA/AHR/CD48/C5AR1/HAS2/PLAU…	LGG
HALLMARK_TNFA_SIGNALING_VIA_NFKB	HALLMARK_TNFA_SIGNALING_VIA_NFKB	199	-0.581422	-1.47482	0.0147059	0.189394	0.167464	5509	tags=54%, list=28%, signal=39%	IFNGR2/IER2/TNFAIP2/B4GALT1/CFLAR/VEGFA/BIRC3/NAMPT/FOSL2/GADD45A/KLF6/MAP2K3/NINJ1/PPP1R15A/CSF1/TRAF1/DDX58/DNAJB4/CEBPD/SLC2A3/NFAT5/RNF19B/BCL3/JUN/JUNB/ATP2B1/CCL4/ICAM1/TNFAIP3/PLPP3/ZFP36/IRF1/FOS/CEBPB/ACKR3/PLK2/INHBA/FOSB/TRIP10/JAG1/LITAF/CCL5/BHLHE40/MAP3K8/SERPINB8/MSC/CSF2/CD83/ATF3/ZC3H12A/TRIB1/CD44/EGR1/SOD2/SPHK1/CCL2/PTGS2/REL/DUSP2/STAT5A/IFIH1/AREG/TNC/SDC4/F3/PLEK/EGR3/GEM/G…	LGG
HALLMARK_IL6_JAK_STAT3_SIGNALING	HALLMARK_IL6_JAK_STAT3_SIGNALING	87	-0.644748	-1.4602	0.03125	0.195312	0.172697	4347	tags=52%, list=22%, signal=40%	CD14/FAS/IRF1/IL18R1/IL7/TNFRSF1B/EBI3/TGFB1/MAP3K8/CRLF2/TNFRSF1A/CSF2/SOCS1/CD44/ITGA4/HMOX1/CCL7/LTBR/IL13RA1/REG1A/IL1R1/MYD88/CCR1/CSF2RA/OSMR/IL12RB1/IL2RG/CSF3R/PIK3R5/SOCS3/TNFRSF12A/TLR2/TNF/CXCL10/CSF2RB/CXCL11/IL1B/IL6/IL1R2/INHBE/ITGB3/CXCL9/IL2RA/IL9R/PLA2G2A	LGG
HALLMARK_APOPTOSIS	HALLMARK_APOPTOSIS	160	-0.575774	-1.41858	0.03125	0.195312	0.172697	5637	tags=47%, list=29%, signal=34%	TSPO/PDGFRB/PSEN2/SAT1/MMP2/CYLD/CFLAR/PLPPR4/ERBB2/BIRC3/GADD45A/TNFSF10/GSN/BMF/GPX3/TIMP3/IFITM3/CCNA1/RNASEL/HSPB1/CDK2/TGFBR3/LEF1/JUN/BCL10/PAK1/BRCA1/CD14/FAS/BCL2L11/IRF1/F2/CASP7/LGALS3/EREG/CTH/TOP2A/ATF3/NEFH/AIFM3/CD44/LUM/ANXA1/HMOX1/SOD2/PRF1/MGMT/WEE1/PLCB2/CASP1/CASP6/TIMP1/EMP1/EGR3/GCH1/CASP8/CASP4/GNA15/IL18/BIK/PLAT/TNFRSF12A/IER3/TNF/DPYD/ISG20/CD2/IL1B/TGFB2/IL6/HGF/IL1A/FAS…	LGG
HALLMARK_IL2_STAT5_SIGNALING	HALLMARK_IL2_STAT5_SIGNALING	198	-0.558229	-1.41117	0.0294118	0.195312	0.172697	5267	tags=45%, list=27%, signal=34%	TWSG1/AHNAK/TNFRSF18/SPRED2/MUC1/KLF6/SYNGR2/TNFSF10/SERPINB6/PRKCH/CSF1/TRAF1/SNX9/IL4R/NDRG1/WLS/CYFIP1/TTC39B/CTSZ/PIM1/PLIN2/SERPINC1/IFITM3/SLC2A3/S100A1/IKZF2/SPP1/CDC6/IRF4/IL18R1/BCL2/EEF1AKMT1/TNFRSF1B/NFKBIZ/BHLHE40/MAP3K8/CSF2/IL1RL1/SOCS1/DHRS3/CD83/CD44/LRRC8C/GBP4/SPRY4/PLSCR1/SLC1A5/GPR83/IRF8/FGL2/GALM/SWAP70/EMP1/HOPX/CST7/FAH/SOCS2/CAPG/TNFSF11/CD79B/CD86/HK2/TLR7/F2RL2/IL10RA/A…	LGG
HALLMARK_EPITHELIAL_MESENCHYMAL_TRANSITION	HALLMARK_EPITHELIAL_MESENCHYMAL_TRANSITION	198	-0.555833	-1.40511	0.0294118	0.195312	0.172697	5620	tags=51%, list=29%, signal=37%	PMP22/FLNA/PDGFRB/SAT1/MMP2/FERMT2/SLIT2/GLIPR1/ANPEP/VEGFA/LAMA2/GADD45A/NOTCH2/PLOD1/LOX/FGF2/FUCA1/COL3A1/TIMP3/PCOLCE/CDH6/VIM/ECM2/TGFBR3/JUN/IGFBP3/COL6A2/COL4A2/FSTL1/LAMC1/FMOD/TNFAIP3/GPX7/FAS/SPP1/ITGA2/GREM1/INHBA/CDH11/SNTB1/ITGA5/TGFB1/GJA1/SGCG/MMP14/COL4A1/CXCL8/COL11A1/SLIT3/CD44/LUM/TFPI2/ITGB5/COL1A1/SERPINH1/THBS1/PTHLH/AREG/TIMP1/TNC/COL5A2/IL15/SDC4/RGS4/FBLN5/IGFBP2/VCAM1/CA…	LGG
HALLMARK_PANCREAS_BETA_CELLS	HALLMARK_PANCREAS_BETA_CELLS	40	0.697271	1.5382	0.0106383	0.163121	0.153042	1515	tags=22%, list=8%, signal=21%	NKX6-1/ISL1/NEUROD1/PAX4/SYT13/PCSK2/INSM1/SST/GCG	LIHC
HALLMARK_ALLOGRAFT_REJECTION	HALLMARK_ALLOGRAFT_REJECTION	196	0.614481	1.47622	0.00990099	0.163121	0.153042	4426	tags=51%, list=23%, signal=40%	CCL7/PRKCG/IFNG/IL11/IL9/CARTPT/IL2/CD79A/CRTAM/IRF4/IL4/TRAT1/CCL22/TNF/CD8B/CD3G/CD80/IL2RA/IL12B/CCL11/FASLG/LIF/ITK/GCNT1/CXCR3/CCR5/HDAC9/EREG/IL10/SIT1/CD8A/MMP9/IL12A/CXCL13/ELF4/IL12RB1/ZAP70/PRKCB/IL6/CCR2/IL18/FYB1/LCK/LY75/CD96/TGFB2/IL13/GPR65/IL1B/CCL19/MAP4K1/GZMB/BCAT1/PTPRC/CD3E/CD3D/HLA-DOB/NLRP3/CD2/IL2RB/IL2RG/CD86/KLRD1/CD40LG/IL18RAP/CD247/LTB/CCND2/ST8SIA4/FGR/HLA-DOA/IL15/L…	LIHC
HALLMARK_INFLAMMATORY_RESPONSE	HALLMARK_INFLAMMATORY_RESPONSE	200	0.588275	1.40659	0.00990099	0.163121	0.153042	4400	tags=46%, list=22%, signal=36%	CCL7/NDP/TACR3/TNFAIP6/ITGB8/CLEC5A/LTA/CCL22/CD70/KCNA3/OLR1/PDPN/RASGRP1/IL12B/ADGRE1/CSF3R/LIF/GPR132/TPBG/FPR1/IL1A/OSM/CXCL6/SLAMF1/HAS2/EREG/IL10/MARCO/CCR7/SEMA4D/TNFSF15/PLAUR/CXCR6/IL6/PCDH7/PTAFR/IL18/LCK/PTPRE/GABBR1/TNFRSF9/IL1B/ADORA2B/IL7R/LPAR1/PIK3R5/LAMP3/MEFV/CXCL8/RGS1/PTGER2/SPHK1/CD69/NLRP3/CD48/IL2RB/PTGER4/PROK2/IL18RAP/GNA15/FFAR2/GP1BA/IL15/CYBB/LCP2/GPR183/SLC7A1/HRH1/TN…	LIHC
HALLMARK_KRAS_SIGNALING_DN	HALLMARK_KRAS_SIGNALING_DN	198	0.541917	1.30039	0.029703	0.273267	0.256384	3160	tags=31%, list=16%, signal=27%	MYH7/NPY4R/TEX15/TFAP2B/VPREB1/KLK8/NGB/SLC6A14/EPHA5/PAX3/IFNG/TCL1A/KRT4/CCNA1/CCR8/ACTC1/PAX4/ARHGDIG/NUDT11/TSHB/GRID2/BMPR1B/KRT15/SLC12A3/CD207/FSHB/SHOX2/SERPINB2/ALOX12B/PDCD1/CD80/SLC6A3/IL12B/PROP1/RYR2/LGALS7/CKM/SLC5A5/TFF2/KCNQ2/TFCP2L1/KCNMB1/SNCB/KLK7/RYR1/KLHDC8A/TGFB2/CHRNG/SIDT1/CPA2/SPRR3/MEFV/SCN10A/BRDT/INSL5/CD40LG/GP1BA/RGS11/KCND1/MYOT/TGM1/PTGFR	LIHC
HALLMARK_EPITHELIAL_MESENCHYMAL_TRANSITION	HALLMARK_EPITHELIAL_MESENCHYMAL_TRANSITION	198	0.539098	1.29363	0.029703	0.273267	0.256384	6413	tags=53%, list=33%, signal=36%	COL11A1/COMP/MMP3/LAMC2/PTHLH/COL8A2/BDNF/LAMA1/FAP/FBN2/MMP1/POSTN/CXCL6/RGS4/AREG/SCG2/FOXC2/GREM1/CDH11/CDH6/NTM/PLAUR/OXTR/IL6/ENO2/MXRA5/VCAN/LRRC15/CXCL1/LOXL1/PDLIM4/CTHRC1/COL16A1/SFRP1/TFPI2/CXCL8/SFRP4/TNC/SLIT2/PMEPA1/SERPINE2/BASP1/ADAM12/APLP1/FMOD/GLIPR1/PRRX1/IL15/COL5A1/LUM/GEM/PTX3/THBS2/WIPF1/MFAP5/DPYSL3/ITGA2/COL12A1/COL6A3/CAPG/ABI3BP/EDIL3/GAS1/MAGEE1/MMP2/MATN3/VCAM1/DCN/CO…	LIHC
HALLMARK_EPITHELIAL_MESENCHYMAL_TRANSITION	HALLMARK_EPITHELIAL_MESENCHYMAL_TRANSITION	198	0.717554	2.07057	0.027027	0.21645	0.195944	4173	tags=69%, list=21%, signal=55%	MMP3/COL11A1/MFAP5/GREM1/PTHLH/SPOCK1/LRRC15/ADAM12/PRSS2/FAP/CXCL6/TNFRSF11B/ITGB3/GAS1/SGCD/NTM/COL12A1/MMP1/COMP/INHBA/FOXC2/RGS4/TIMP3/VCAM1/COL8A2/PRRX1/OXTR/COL7A1/PDLIM4/MATN3/THBS2/CTHRC1/VCAN/SFRP4/ECM1/APLP1/LOX/MXRA5/NID2/CXCL8/SNAI2/CDH11/TNC/LOXL2/FBN1/GLIPR1/LOXL1/POSTN/THY1/COL5A2/SPP1/MSX1/FBN2/COL5A3/MYLK/ITGA2/COL5A1/SERPINE2/GPX7/ECM2/SFRP1/WNT5A/IL15/TGFBI/COL16A1/FAS/DCN/FBLN…	LUAD
HALLMARK_INTERFERON_GAMMA_RESPONSE	HALLMARK_INTERFERON_GAMMA_RESPONSE	198	0.618226	1.78395	0.027027	0.21645	0.195944	5949	tags=66%, list=30%, signal=47%	CCL7/TNFAIP6/VCAM1/SSPN/CXCL11/ZBP1/GPR18/GBP6/ITGB7/FCGR1A/FPR1/PTGS2/IRF4/CD86/CXCL10/IDO1/ST8SIA4/SLAMF7/IL7/IL15/CD274/FAS/EPSTI1/IFI44L/CD69/CXCL9/CSF2RB/LCP2/IRF8/P2RY14/IL2RB/FGL2/HLA-G/CCL2/RTP4/SOCS1/IL10RA/KLRK1/CD40/RSAD2/OASL/STAT4/SAMD9L/GZMA/CMKLR1/IL6/BATF2/CASP1/TNFAIP3/DDX60/IFNAR2/IRF5/PSMB9/IL15RA/IL18BP/HLA-DQA1/IFI27/PIM1/C1R/XAF1/JAK2/C1S/TNFSF10/IFI44/UPP1/METTL7B/GBP4/PLSC…	LUAD
HALLMARK_ALLOGRAFT_REJECTION	HALLMARK_ALLOGRAFT_REJECTION	196	0.615438	1.74239	0.030303	0.21645	0.195944	3728	tags=56%, list=19%, signal=46%	CCL7/IL9/EREG/IL13/MBL2/CCL11/IL11/PRKCG/CD80/IL2/INHBA/IL2RA/TRAT1/CD28/FCGR2B/TNF/IFNG/CRTAM/IL1B/CCL13/CD3G/IL10/MMP9/CCR2/GPR65/NLRP3/ITK/SIT1/IL12RB1/THY1/IRF4/CCL22/HDAC9/CD96/BCAT1/CD86/IL18RAP/ST8SIA4/IL7/CXCR3/CCR5/GZMB/GCNT1/CD79A/IL15/CCL4/FAS/KLRD1/IL16/CD3D/CXCL9/IGSF6/LCK/CD8B/LCP2/CCR1/PTPRC/IRF8/FASLG/CD1D/LY75/CD247/IL2RB/HLA-G/CCL2/ACHE/CXCL13/SOCS1/ICOSLG/LTB/FYB1/CD7/CD2/CD40/…	LUAD
HALLMARK_INFLAMMATORY_RESPONSE	HALLMARK_INFLAMMATORY_RESPONSE	200	0.578206	1.67955	0.0263158	0.21645	0.195944	4261	tags=56%, list=22%, signal=45%	NDP/CCL7/EREG/CD70/TNFRSF9/CXCL6/PCDH7/TNFAIP6/CLEC5A/ITGB3/ITGB8/CCL24/SPHK1/INHBA/CCL17/IL1A/PDPN/CXCL11/LTA/IL1B/CCL20/OSM/KCNA3/IL10/SLC31A2/CXCL8/GPR132/FPR1/SLAMF1/NLRP3/CCL22/MSR1/EBI3/AQP9/SELL/TNFSF9/DCBLD2/IL18RAP/CXCL10/CCR7/CXCR6/IL15/HAS2/C3AR1/IL7R/ADM/CD69/CXCL9/RASGRP1/LCK/P2RX7/LCP2/SERPINE1/CHST2/GPR183/CD48/IL2RB/CCL2/PTAFR/PTGIR/RGS1/RTP4/RGS16/NOD2/ICOSLG/SELE/CYBB/IL10RA/HRH…	LUAD
HALLMARK_TNFA_SIGNALING_VIA_NFKB	HALLMARK_TNFA_SIGNALING_VIA_NFKB	199	0.549838	1.59637	0.0263158	0.21645	0.195944	4743	tags=46%, list=24%, signal=35%	TNFRSF9/CXCL6/TNFAIP6/CSF2/CD80/SPHK1/INHBA/TNF/IL1A/GFPT2/CXCL11/MSC/IL1B/CCL20/IL23A/TNC/PLAU/EGR3/PTGS2/SERPINB2/TNFSF9/CXCL10/TNFAIP8/FOSL1/EGR2/CCL4/IL7R/CD69/SLC2A3/BCL2A1/GADD45A/SERPINE1/GPR183/CCL2/SLC2A6/PTX3/AREG/DUSP2/ICOSLG/PLEK/CXCL1/CSF1/FJX1/PLAUR/SERPINB8/IL6/PHLDA1/OLR1/TRAF1/PMEPA1/G0S2/TNFAIP3/PTGER4/IL15RA/CCRL2/LIF/TIPARP/PHLDA2/MXD1/TUBB2A/JAG1/CD83/CD44/ACKR3/F2RL1/NFKBIE/…	LUAD
HALLMARK_IL6_JAK_STAT3_SIGNALING	HALLMARK_IL6_JAK_STAT3_SIGNALING	87	0.588666	1.57963	0.0263158	0.21645	0.195944	4323	tags=48%, list=22%, signal=38%	CCL7/CRLF2/DNTT/ITGB3/CSF2/IL2RA/TNF/IL9R/CXCL11/IL1B/IL12RB1/EBI3/CXCL10/IL7/ITGA4/FAS/CXCL9/CSF2RB/CSF2RA/PDGFC/CCR1/IL1R2/CXCL13/SOCS1/LTB/REG1A/CXCL1/CSF1/IL18R1/IL6/PIK3R5/IL15RA/PIM1/IL2RG/CD14/TGFB1/CD44/IL1R1/IL17RB/IL3RA/IRF1/TNFRSF12A	LUAD
HALLMARK_INTERFERON_ALPHA_RESPONSE	HALLMARK_INTERFERON_ALPHA_RESPONSE	95	0.577258	1.54504	0.025641	0.21645	0.195944	6550	tags=69%, list=33%, signal=47%	CXCL11/SELL/CXCL10/IL7/IL15/EPSTI1/IFI44L/RTP4/RSAD2/OASL/LPAR6/SAMD9L/CSF1/PROCR/BATF2/CASP1/DDX60/PSMB9/CCRL2/IFI27/GBP2/C1S/IFI44/GBP4/PLSCR1/UBE2L6/SAMD9/RIPK2/CMPK2/IFITM1/IFIH1/IRF1/TAP1/OAS1/BST2/IRF9/IFIT3/IFI30/ISG15/LAP3/MX1/HERC6/TRIM21/NMI/LY6E/PARP9/TMEM140/IFI35/NCOA7/TRAFD1/UBA7/B2M/PSMB8/PSME2/USP18/TXNIP/SP110/IL4R/HLA-C/CD74/NUB1/PARP12/IRF7/CD47/IFIT2/TDRD7	LUAD
HALLMARK_EPITHELIAL_MESENCHYMAL_TRANSITION	HALLMARK_EPITHELIAL_MESENCHYMAL_TRANSITION	198	0.710807	1.7942	0.0106383	0.117647	0.106502	4106	tags=70%, list=21%, signal=56%	MFAP5/COL11A1/CDH6/GREM1/LRRC15/MATN3/COMP/SGCD/FAP/TIMP3/MMP3/NTM/INHBA/RGS4/PRSS2/NID2/COL12A1/ECM2/SFRP4/COL5A3/FOXC2/GAS1/CDH11/LOXL2/FBN1/COL8A2/ADAM12/ITGB3/THBS2/PRRX1/POSTN/VCAN/SLIT3/FBLN2/COL5A1/PMEPA1/THY1/NT5E/MXRA5/EDIL3/EFEMP2/LAMA2/VCAM1/COL6A3/COL16A1/COL5A2/MMP1/TAGLN/ELN/CTHRC1/NNMT/FSTL3/ACTA2/CXCL6/ECM1/MYLK/PCOLCE/GEM/FMOD/LOX/MMP2/PDGFRB/SPOCK1/LOXL1/AREG/DCN/GLIPR1/ANPEP/CA…	LUSC
HALLMARK_TNFA_SIGNALING_VIA_NFKB	HALLMARK_TNFA_SIGNALING_VIA_NFKB	199	0.612071	1.54779	0.0106383	0.117647	0.106502	5996	tags=68%, list=31%, signal=48%	CSF2/INHBA/TNFAIP6/GFPT2/TNF/CD80/IL1A/PMEPA1/IL7R/SIK1/EGR3/NR4A3/CXCL11/CD69/TNFRSF9/CXCL6/GEM/IL1B/OLR1/LIF/BMP2/AREG/EGR2/GPR183/ICOSLG/TNC/CCRL2/SERPINE1/BCL2A1/PLAUR/SLC2A3/PTPRE/CCL2/CXCL10/SPHK1/G0S2/CXCL3/CXCL1/SERPINB2/CXCL2/PTGS2/IL6/SLC2A6/MSC/ICAM1/PTX3/CCL20/TLR2/PLAU/PLEK/ZC3H12A/CCL4/SERPINB8/DRAM1/PDE4B/KLF10/CSF1/TNFAIP3/KLF9/HBEGF/FOSL1/PHLDA1/TUBB2A/KLF2/BIRC3/PHLDA2/CCL5/EDN1…	LUSC
HALLMARK_INFLAMMATORY_RESPONSE	HALLMARK_INFLAMMATORY_RESPONSE	200	0.598535	1.50957	0.0106383	0.117647	0.106502	4542	tags=60%, list=23%, signal=46%	NDP/EREG/INHBA/TNFAIP6/CCL7/HAS2/CLEC5A/ITGB3/NLRP3/PTGER2/PROK2/IL10/IL1A/BDKRB1/OSM/PTGIR/IL7R/AQP9/MSR1/TACR3/SLC31A2/HRH1/FPR1/CXCL11/KCNA3/ROS1/CD69/FFAR2/TNFRSF9/PDPN/CXCL6/SCN1B/AXL/CCL22/IL1B/OLR1/C3AR1/SLC4A4/LIF/MEFV/CCL24/SLAMF1/GPR183/ICOSLG/CCRL2/GPR132/CMKLR1/NOD2/IL10RA/SERPINE1/PIK3R5/PLAUR/RGS16/APLNR/MARCO/ITGA5/CXCR6/LCP2/CSF3R/CCL17/CYBB/EMP3/PTPRE/C5AR1/CD48/IL1R1/CCL2/PTAFR/…	LUSC
HALLMARK_IL6_JAK_STAT3_SIGNALING	HALLMARK_IL6_JAK_STAT3_SIGNALING	87	0.628343	1.50721	0.0117647	0.117647	0.106502	4990	tags=59%, list=25%, signal=44%	CSF2/CCL7/TNF/ITGB3/REG1A/CXCL11/IL9R/ITGA4/PDGFC/IL1B/IL2RA/CCR1/PIK3R5/TNFRSF12A/CSF3R/IL12RB1/PLA2G2A/CSF2RB/CSF2RA/IL1R1/CXCL13/CXCL10/EBI3/CXCL3/CXCL1/TNFRSF1B/CD14/ACVRL1/IL6/CD38/IL2RG/IL7/LTB/TLR2/CXCL9/TGFB1/CSF1/IL1R2/FAS/CRLF2/IL4R/IL15RA/IL18R1/A2M/MAP3K8/OSMR/IL3RA/SOCS3/SOCS1/PIM1/IL6ST	LUSC
HALLMARK_ALLOGRAFT_REJECTION	HALLMARK_ALLOGRAFT_REJECTION	196	0.568268	1.4384	0.0105263	0.117647	0.106502	4891	tags=64%, list=25%, signal=49%	IL11/EREG/INHBA/CCL7/CCL11/TNF/ELANE/CCL13/FCGR2B/NLRP3/CCR2/KRT1/IRF4/CD80/IL10/THY1/IL16/TGFB2/GPR65/CD79A/CD28/FYB1/CCL22/IL1B/LIF/IL2RA/ICOSLG/STAT4/RPL3L/MMP9/LY86/IGSF6/CCR1/ITK/LCP2/CCR5/IL12RB1/IL2/CD86/IRF8/BCAT1/PTPRC/F2R/NCF4/SIT1/CD1D/CCL2/CXCL13/ITGB2/ETS1/CXCR3/CCND2/DYRK3/HLA-DMB/CD40LG/SPI1/CD4/HLA-DQA1/IL2RB/HLA-DOA/C2/CRTAM/WAS/CD2/STAB1/CD3G/FGR/TRAT1/IL6/ICAM1/CD3E/IL2RG/IL7/H…	LUSC
HALLMARK_INTERFERON_GAMMA_RESPONSE	HALLMARK_INTERFERON_GAMMA_RESPONSE	198	0.55388	1.39809	0.0212766	0.177305	0.160508	6090	tags=58%, list=31%, signal=40%	TNFAIP6/CCL7/SSPN/IRF4/ZBP1/FPR1/CXCL11/VCAM1/FCGR1A/CD69/SLAMF7/STAT4/EPSTI1/CMKLR1/IL10RA/CFH/LCP2/CFB/CD86/IRF8/CSF2RB/FGL2/ITGB7/P2RY14/CCL2/CXCL10/HLA-DQA1/RSAD2/IL2RB/LATS2/PTGS2/IL6/SELP/CD38/C1S/ICAM1/SERPING1/IL7/HLA-G/C1R/XAF1/EIF4E3/CXCL9/CIITA/IFITM2/PDE4B/TNFAIP3/OASL/FAS/VAMP5/ISG20/IFNAR2/ST3GAL5/MT2A/GZMA/UPP1/IFI44L/BPGM/HLA-DMA/IL4R/CCL5/IRF7/ST8SIA4/IL15RA/HLA-DRB1/CD40/SAMD9L/…	LUSC
HALLMARK_PANCREAS_BETA_CELLS	HALLMARK_PANCREAS_BETA_CELLS	40	-0.755332	-2.02532	0.0294118	0.210084	0.190181	1495	tags=40%, list=8%, signal=37%	ISL1/PCSK2/PAX6/NKX2-2/PDX1/NEUROG3/HNF1A/INSM1/CHGA/ABCC8/DCX/SLC2A2/PAX4/GCG/NEUROD1/SCGN	LUSC
HALLMARK_INTERFERON_GAMMA_RESPONSE	HALLMARK_INTERFERON_GAMMA_RESPONSE	198	-0.615773	-1.47233	0.0126582	0.632911	0.632911	5162	tags=56%, list=26%, signal=42%	PNPT1/IFI35/PSMA3/HLA-DMA/DHX58/NOD1/STAT1/SSPN/ZNFX1/CD69/SLC25A28/HLA-DRB1/TNFAIP3/TAP1/SOCS1/SECTM1/BST2/CCL2/SAMHD1/IRF7/NFKBIA/PARP12/CD40/ISOC1/CASP1/PSMB10/CCL5/IL15RA/RNF213/IL15/FCGR1A/TRIM21/PARP14/PSME2/AUTS2/MTHFD2/HLA-DQA1/FPR1/TRIM25/JAK2/LAP3/ST8SIA4/PLSCR1/SP110/NAMPT/ISG15/SELP/IFI44/CASP7/TRIM14/CIITA/IL10RA/IRF1/BANK1/IL6/OAS3/RAPGEF6/CMKLR1/LCP2/NLRC5/MX1/FGL2/DDX58/IRF9/HLA-G…	MESO
HALLMARK_IL6_JAK_STAT3_SIGNALING	HALLMARK_IL6_JAK_STAT3_SIGNALING	87	0.729989	2.18792	0.047619	0.21645	0.209615	2371	tags=48%, list=12%, signal=43%	CRLF2/CD36/IL9R/IL6/IL2RA/CSF2/CSF2RB/CXCL13/PLA2G2A/ITGA4/CXCL9/CCL7/PIK3R5/CSF2RA/ITGB3/IL12RB1/PF4/IL2RG/EBI3/CSF3R/TLR2/IL1B/CCR1/LTB/ACVRL1/TNF/IL4R/CXCL1/IL7/CXCL11/CXCL3/CD38/IL18R1/TGFB1/DNTT/OSMR/TNFRSF1B/FAS/HMOX1/CD44/CD14/CXCL10	OV
HALLMARK_INTERFERON_ALPHA_RESPONSE	HALLMARK_INTERFERON_ALPHA_RESPONSE	95	0.60111	1.8836	0.0454545	0.21645	0.209615	5511	tags=57%, list=28%, signal=41%	CCRL2/SELL/IL4R/IFI30/C1S/PROCR/IL7/EPSTI1/IL15/CXCL11/GBP2/LPAR6/CXCL10/CASP1/RSAD2/OASL/GBP4/CSF1/NCOA7/RIPK2/TAP1/IFI35/SAMD9L/CMPK2/IRF1/B2M/CD74/PLSCR1/PSMB9/LAMP3/PARP9/IFITM2/HLA-C/IFIT3/IFI27/ELF1/TMEM140/ISG20/IFITM1/TRIM14/STAT2/USP18/IFI44L/DHX58/BATF2/IFIT2/LAP3/CD47/HELZ2/TDRD7/OAS1/PARP14/UBE2L6/IFI44	OV
HALLMARK_ANGIOGENESIS	HALLMARK_ANGIOGENESIS	36	0.72473	1.79479	0.0333333	0.21645	0.209615	3164	tags=56%, list=16%, signal=47%	POSTN/VCAN/COL5A2/LUM/OLR1/THBD/PF4/COL3A1/LPL/PRG2/CXCL6/NRP1/VTN/KCNJ8/FSTL1/SPP1/PGLYRP1/SLCO2A1/ITGAV/STC1	OV
HALLMARK_TGF_BETA_SIGNALING	HALLMARK_TGF_BETA_SIGNALING	54	0.509109	1.38027	0.0454545	0.21645	0.209615	5152	tags=48%, list=26%, signal=36%	SERPINE1/THBS1/BMP2/RAB31/PMEPA1/TGFB1/LTBP2/ID3/KLF10/SMAD7/SKIL/ID1/SLC20A1/TGFBR1/NOG/SMAD1/PPP1R15A/ENG/SMURF2/APC/ACVR1/NCOR2/ID2/JUNB/WWTR1/SMAD6	OV
HALLMARK_PANCREAS_BETA_CELLS	HALLMARK_PANCREAS_BETA_CELLS	40	-0.729051	-1.47339	0.0340909	0.852273	0.852273	3799	tags=57%, list=19%, signal=46%	PDX1/FOXA2/STXBP1/HNF1A/CHGA/SCGN/G6PC2/IAPP/NKX6-1/ABCC8/ISL1/PCSK2/NEUROG3/NEUROD1/PAX6/NKX2-2/SLC2A2/PCSK1/GCK/PKLR/PAK3/INSM1/DCX	PAAD
HALLMARK_SPERMATOGENESIS	HALLMARK_SPERMATOGENESIS	133	-0.603419	-1.36524	0.03125	0.852273	0.852273	3441	tags=34%, list=18%, signal=28%	ACTL7B/HOXB1/ACRBP/AKAP4/GFI1/SHE/PCSK1N/GAPDHS/TNP2/CLVS1/POMC/NPY5R/ADCYAP1/HSPA4L/SCG3/CNIH2/TEKT2/GPR182/PAPOLB/PACRG/YBX2/CCNA1/CHRM4/NOS1/IL13RA2/CRISP2/ALOX15/ADAD1/TKTL1/CLGN/NAA11/SNAP91/ART3/GSG1/HBZ/DCC/ZPBP/DDX25/PDHA2/ZNRF4/MEP1B/TNP1/TUBA3C/ADAM2/HTR5A	PAAD
HALLMARK_PANCREAS_BETA_CELLS	HALLMARK_PANCREAS_BETA_CELLS	40	-0.787906	-1.69125	0.0178571	0.892857	0.892857	1091	tags=30%, list=6%, signal=28%	DPP4/SST/GCK/VDR/GCG/G6PC2/NKX2-2/NEUROD1/IAPP/HNF1A/FOXA2/PDX1	PCPG
HALLMARK_EPITHELIAL_MESENCHYMAL_TRANSITION	HALLMARK_EPITHELIAL_MESENCHYMAL_TRANSITION	198	0.685456	1.71921	0.0147059	0.147059	0.133127	4778	tags=66%, list=24%, signal=50%	SGCG/GAS1/PTHLH/PCOLCE2/COMP/NTM/MFAP5/SLIT2/CDH2/COL11A1/ECM2/SFRP1/ADAM12/RGS4/FAP/MATN3/SFRP4/SPOCK1/LRRC15/PRRX1/SPP1/COL8A2/DKK1/IL6/SLIT3/LOX/TIMP3/THBS2/SGCD/FBLN2/VEGFC/DCN/CTHRC1/GREM1/SNAI2/INHBA/VCAM1/POSTN/LOXL1/FBN1/VCAN/GPX7/MXRA5/CDH11/EFEMP2/FERMT2/DPYSL3/FBLN1/MGP/NNMT/LAMA2/PRSS2/PTX3/CADM1/FGF2/PCOLCE/APLP1/GPC1/EMP3/GLIPR1/BASP1/SERPINE1/EDIL3/CXCL8/CAP2/HTRA1/TGFB1/MYLK/LUM/F…	READ
HALLMARK_INFLAMMATORY_RESPONSE	HALLMARK_INFLAMMATORY_RESPONSE	200	0.612607	1.54042	0.0144928	0.147059	0.133127	4451	tags=48%, list=23%, signal=37%	CCL7/MARCO/CLEC5A/NDP/CD70/OLR1/MSR1/CCL17/ROS1/TNFAIP6/P2RX7/AQP9/IL10/PROK2/TNFRSF9/CXCL11/OSM/LTA/FPR1/IL6/CXCL10/CD69/SPHK1/TLR1/CXCL9/PIK3R5/C3AR1/NLRP3/PTGIR/CSF3R/TNFSF9/PCDH7/TLR2/CCL2/CMKLR1/INHBA/SLC31A2/PTAFR/CD48/MEFV/ADGRE1/SCN1B/C5AR1/CYBB/LCP2/IL10RA/SELE/GPC3/CX3CL1/AXL/ICOSLG/IL12B/EMP3/CXCR6/SERPINE1/CCL5/GPR183/CSF3/CALCRL/PDPN/SLAMF1/CD14/SELL/CXCL8/SLC7A2/BEST1/ICAM1/RGS1/CCL…	READ
HALLMARK_ALLOGRAFT_REJECTION	HALLMARK_ALLOGRAFT_REJECTION	196	0.607996	1.52011	0.0147059	0.147059	0.133127	4269	tags=50%, list=22%, signal=40%	IL13/CCL7/FCGR2B/CCL13/CARTPT/IL10/CRTAM/ELANE/KLRD1/CCR2/IFNG/CCL4/BCAT1/IL6/CD86/GPR65/FASLG/NCR1/CD80/TLR1/CXCL9/HLA-DOA/NLRP3/LY86/CCR1/HDAC9/IGSF6/CD8A/TLR2/TNF/CCR5/SIT1/CCL2/HLA-DQA1/FGR/MMP9/ITGB2/CD96/INHBA/CXCL13/TGFB2/IL2RA/HLA-DMB/SPI1/IL9/FYB1/LCP2/APBB1/GZMB/TLR6/CFP/IL12RB1/ST8SIA4/ITK/ICOSLG/IL12B/IL16/CD8B/CD7/WAS/PTPRC/CD4/CCL5/CD3G/CCL19/TGFB1/CDKN2A/ICAM1/CCL22/THY1/ITGAL/CD28…	READ
HALLMARK_MYOGENESIS	HALLMARK_MYOGENESIS	199	0.588935	1.48078	0.0144928	0.147059	0.133127	4644	tags=46%, list=24%, signal=36%	MYH1/TNNT3/SGCG/SLN/MYL3/ANKRD2/MYH8/MYOG/IGF1/MYL7/CASQ2/MYH4/ADAM12/RYR1/HSPB2/PPP1R3C/MYH7/CAMK2B/PTGIS/MYBPH/MRAS/TNNT1/MYL2/MYOZ1/TNNI2/ACTC1/EFS/SPHK1/NOS1/CD36/SGCD/FST/SGCA/FXYD1/APOD/HSPB8/PYGM/COX6A2/CAV3/CACNG1/SPEG/PVALB/CASQ1/SSPN/COX7A1/CLU/MAPK12/DES/LAMA2/REEP1/FGF2/GNAO1/LSP1/LDB3/AEBP1/CRYAB/DMD/FABP3/CFD/SCHIP1/GPX3/TGFB1/MYLK/MEF2C/MB/PKIA/TCAP/TAGLN/CTF1/WWTR1/FHL1/PPFIA4/MYH…	READ
HALLMARK_INTERFERON_GAMMA_RESPONSE	HALLMARK_INTERFERON_GAMMA_RESPONSE	198	0.58822	1.47533	0.0147059	0.147059	0.133127	5908	tags=52%, list=30%, signal=36%	GBP6/CCL7/FCGR1A/TNFAIP6/CXCL11/FPR1/IL6/CD86/IDO1/CXCL10/CD69/CXCL9/CFH/IFI44L/CCL2/HLA-DQA1/CMKLR1/VCAM1/IFI30/CD274/SSPN/LCP2/IL10RA/GBP4/SLAMF7/ST8SIA4/RSAD2/ITGB7/IFIT1/CIITA/CCL5/SERPING1/IL18BP/SELP/CSF2RB/ICAM1/USP18/ZBP1/FGL2/IFIT3/C1S/C1R/IL2RB/ST3GAL5/VAMP5/STAT4/GZMA/PLA2G4A/IL15/IFIT2/CD40/IRF5/HLA-DMA/SECTM1/BST2/IFI44/P2RY14/HLA-DRB1/IL7/CD38/CASP4/CMPK2/PDE4B/OAS2/SOCS3/MX2/TNFAIP…	READ
HALLMARK_KRAS_SIGNALING_DN	HALLMARK_KRAS_SIGNALING_DN	198	0.569716	1.42892	0.0441176	0.294118	0.266254	3092	tags=32%, list=16%, signal=27%	FSHB/SPRR3/PAX3/TSHB/KRT5/SERPINB2/TENM2/FGF16/PCDHB1/SNCB/CDH16/SLC30A3/TEX15/SCGB1A1/OXT/KCNQ2/CCNA1/LGALS7/PNMT/EPHA5/ZBTB16/RYR1/CPB1/CCR8/KRT4/KLK7/MYH7/NUDT11/IFNG/KCNN1/EGF/AMBN/ACTC1/KCNMB1/PDE6B/CD80/PDCD1/NOS1/EDN2/ATP4A/SSTR4/SLC6A3/ATP6V1B1/ITIH3/COPZ2/IFI44L/SHOX2/KLK8/TGFB2/DCC/CACNG1/MEFV/YPEL1/PRODH/MYOT/KCNE2/BRDT/SLC12A3/RSAD2/IL12B/GAMT/TFAP2B/CPA2	READ
HALLMARK_APICAL_JUNCTION	HALLMARK_APICAL_JUNCTION	199	0.55806	1.40315	0.0434783	0.294118	0.266254	5147	tags=40%, list=26%, signal=30%	KRT31/CNTN1/SLC30A3/CLDN11/DMP1/CALB2/SLIT2/DSC1/ALOX15B/LAYN/CLDN19/TRO/ACTC1/CD86/ADAM23/CLDN14/NRXN2/CADM3/CERCAM/MMP9/ICAM5/VCAM1/CD274/PARD6G/TSPAN4/FBN1/SPEG/VCAN/CDH11/FYB1/NEGR1/CX3CL1/CD209/GAMT/ADAMTS5/EVL/NEXN/PTPRC/AKT3/NLGN2/CLDN5/SGCE/ICAM1/THY1/MAPK11/MMP2/ARHGEF6/ACTG2/COL16A1/SIRPA/JAM3/CLDN6/ITGA10/MYL9/FSCN1/CDH6/BMP1/MYH10/AMIGO2/ACTN3/ACTA1/FLNC/ICAM2/RHOF/NLGN3/CLDN9/RAC2/CD…	READ
HALLMARK_ALLOGRAFT_REJECTION	HALLMARK_ALLOGRAFT_REJECTION	196	0.617501	1.47502	0.0116279	0.581395	0.581395	3761	tags=35%, list=19%, signal=29%	CARTPT/MBL2/CCL22/TRAT1/IL12B/KRT1/IFNG/CXCL13/IL2/ITK/CD3G/FASLG/CD8B/CD79A/IL11/CXCR3/CCL19/SIT1/F2/CD8A/CRTAM/LY75/CD7/HLA-DOB/CD40LG/CD247/CD3E/CD3D/CD96/ZAP70/CXCL9/IL9/CD2/PRKCB/MMP9/LCK/IL13/TNF/STAT4/CCR2/MAP4K1/GZMB/RPL3L/LTB/KLRD1/IL18RAP/CCR5/IRF4/HLA-DQA1/CFP/CD80/IL12RB1/HLA-DOA/IL2RG/ITGAL/CCL4/IL4/INHBA/TGFB2/IRF8/GZMA/CDKN2A/ACHE/CCL5/ICOSLG/PRF1/NOS2/IL2RB/IL16	SARC
HALLMARK_ESTROGEN_RESPONSE_LATE	HALLMARK_ESTROGEN_RESPONSE_LATE	197	0.688844	1.47924	0.0106383	0.177305	0.171706	3960	tags=40%, list=20%, signal=32%	KLK11/OVOL2/AGR2/KRT13/TRIM29/SCNN1A/GJB3/KLK10/SULT2B1/PKP3/LAMC2/AREG/CLIC3/TJP3/SFN/FGFR3/NMU/SLC24A3/NPY1R/CA2/ST14/MAPK13/PTGER3/KRT19/TPSAB1/S100A9/CYP4F11/RAPGEFL1/CXCL14/TPD52L1/TFF1/TH/CACNA2D2/HMGCS2/TPBG/LLGL2/PERP/SERPINA5/HOMER2/KLF4/CA12/RET/GAL/IMPA2/ASS1/HSPA4L/FRK/MYB/KCNK5/ANXA9/LTF/TFAP2C/LSR/CYP26B1/FABP5/PTGES/TIAM1/MYOF/PGR/TNNC1/FOXC1/IGSF1/FLNB/PLAC1/TFF3/PCP4/PRSS23/ACOX2…	SKCM
HALLMARK_ESTROGEN_RESPONSE_EARLY	HALLMARK_ESTROGEN_RESPONSE_EARLY	198	0.677373	1.45705	0.0106383	0.177305	0.171706	3960	tags=37%, list=20%, signal=30%	OVOL2/ESRP2/KRT13/SCNN1A/KLK10/MSMB/KRT15/SULT2B1/ELF3/P2RY2/AREG/CLIC3/TJP3/SFN/AQP3/CALB2/LAD1/SLC24A3/NPY1R/BCL11B/SYT12/ZNF185/KRT19/MAST4/GJA1/RAPGEFL1/THSD4/TPD52L1/TFF1/RHOD/SYBU/TPBG/KLF4/ABLIM1/CA12/GFRA1/RET/WWC1/FRK/MYB/SLC2A1/KCNK5/ANXA9/CLDN7/TFAP2C/CYP26B1/REEP1/PTGES/TIAM1/MYOF/PGR/SLC7A2/RASGRP1/FOXC1/SEC14L2/DHRS3/FLNB/TFF3/INHBB/AR/PRSS23/FHL2/KCNK15/HR/LRIG1/KRT18/NRIP1/KRT8/OP…	SKCM
HALLMARK_P53_PATHWAY	HALLMARK_P53_PATHWAY	195	0.635929	1.36984	0.0106383	0.177305	0.171706	2597	tags=16%, list=13%, signal=14%	KLK8/SERPINB5/CLCA2/TP63/NHLH2/GPX2/SFN/KRT17/ALOX15B/IL1A/TCHH/ST14/TGFA/TPD52L1/ITGB4/CDH13/BMP2/ZBTB16/TNNI1/PERP/CEBPA/KLF4/RRAD/SDC1/EPS8L2/CDKN2B/HSPA4L/GLS2/CCND2/MXD1/DGKA/VWA5A	SKCM
HALLMARK_APICAL_JUNCTION	HALLMARK_APICAL_JUNCTION	199	0.632734	1.36704	0.0210526	0.263158	0.254848	3662	tags=23%, list=19%, signal=19%	DSC1/CDSN/KRT31/PPP2R2C/DSC3/GRB7/CRB3/COL17A1/CLDN4/CLDN19/CLDN8/LAMC2/NECTIN4/EGFR/CALB2/MPZL2/LAMA3/ALOX15B/MAPK13/ITGB4/JUP/AMIGO2/CDH8/NECTIN1/CADM2/LAMB3/CNTN1/COL9A1/SLIT2/CLDN7/CLDN6/PDZD3/SPEG/NEGR1/CDH3/GNAI1/ITGA2/NRTN/KCNH2/MAP3K20/FBN1/PCDH1/CDH1/CLDN5/ADAMTS5/LAYN	SKCM
HALLMARK_SPERMATOGENESIS	HALLMARK_SPERMATOGENESIS	133	0.652474	1.19306	0.039604	1	1	3749	tags=34%, list=19%, signal=28%	PDHA2/HTR5A/SYCP1/GSG1/ZNRF4/ODF1/PAPOLB/NAA11/DDX4/CST8/DNAJB8/ZPBP/DPEP3/ADAD1/TUBA3C/TNP2/NEFH/ADAM2/DMRT1/AKAP4/TULP2/PRM2/ACTL7B/TNNI3/PGK2/ELOVL3/SLC2A5/TEKT2/POMC/TNP1/CCNA1/IL12RB2/DDX25/HOXB1/GAPDHS/TCP11/NPY5R/HBZ/GAD1/ACRV1/ART3/MLF1/LDHC/CHRM4/DMC1	STAD
HALLMARK_KRAS_SIGNALING_UP	HALLMARK_KRAS_SIGNALING_UP	198	0.583539	1.35466	0.0444444	0.732601	0.732601	4920	tags=43%, list=25%, signal=32%	EREG/PPBP/NR1H4/CIDEA/PIGR/ANXA10/TSPAN1/SLPI/MALL/ARG1/USH1C/PCP4/CCL20/BTC/NR0B2/PTGS2/MMP10/HOXD11/IL1RL2/CFB/FGF9/ABCB1/RETN/HKDC1/TNNT2/PLEK2/ITGBL1/TPH1/CAB39L/RELN/PLAT/ANO1/G0S2/IGF2/KCNN4/SOX9/IL33/CSF2/INHBA/CROT/CFH/HDAC9/ADAMDEC1/WNT7A/F13A1/IRF8/EMP1/TMEM100/LY96/SPON1/TMEM176A/MMP11/IL1B/IGFBP3/FBXO4/ITGA2/PRKG2/GALNT3/HSD11B1/GNG11/IL7R/PRRX1/SEMA3B/APOD/ADAM8/GPNMB/ANGPTL4/SNAP25/…	TGCT
HALLMARK_ALLOGRAFT_REJECTION	HALLMARK_ALLOGRAFT_REJECTION	196	0.697531	2.21428	0.0181818	0.0612745	0.0361197	3939	tags=60%, list=20%, signal=48%	EREG/CCL11/ELANE/IL9/CCL7/CCL22/CCL13/IL11/MBL2/KRT1/PRKCG/INHBA/CCL19/CD80/IL12B/BCAT1/IL2RA/LTB/IL6/TNF/CXCL13/HLA-G/CD28/IL10/C2/CDKN2A/FCGR2B/STAT4/CD79A/TRAT1/HLA-DOB/IL2/CD86/ITK/TLR6/IGSF6/CD40LG/CRTAM/IFNG/CCR2/SIT1/IL2RG/IL12RB1/HLA-DOA/CD3G/IRF8/NCF4/CD3D/CD7/IL18RAP/CCR1/MMP9/CCR5/LY86/MAP4K1/IL18/CD2/LIF/CD3E/PTPRC/ITGB2/HLA-DQA1/IL13/NLRP3/CXCL9/CD8B/WAS/CXCR3/CCL2/IL2RB/SPI1/CD247/Z…	THCA
HALLMARK_TNFA_SIGNALING_VIA_NFKB	HALLMARK_TNFA_SIGNALING_VIA_NFKB	199	0.673944	2.14599	0.0181818	0.0612745	0.0361197	4822	tags=60%, list=25%, signal=46%	SERPINB2/CXCL6/CCL20/CSF2/CXCL1/TNFSF9/INHBA/CD80/TNFRSF9/CXCL3/IL12B/TNFAIP6/IL6/TNF/BIRC3/MSC/IL1A/PLAUR/PTGS2/IL7R/AREG/LDLR/CXCL2/FOSL1/SIK1/LAMB3/BCL2A1/IL23A/PTPRE/TNC/OLR1/DUSP2/CD69/CXCL11/PLAU/GFPT2/KYNU/IL18/LIF/CXCL10/CCL2/PLEK/PTGER4/ICOSLG/DRAM1/IL1B/TUBB2A/G0S2/ICAM1/SLC2A3/DUSP5/ZC3H12A/SPHK1/NR4A3/MAFF/SLC2A6/CCL4/GEM/CSF1/REL/DUSP4/HBEGF/SERPINB8/EDN1/GPR183/PHLDA2/FOSL2/EGR3/IFI…	THCA
HALLMARK_EPITHELIAL_MESENCHYMAL_TRANSITION	HALLMARK_EPITHELIAL_MESENCHYMAL_TRANSITION	198	0.672567	2.12548	0.0192308	0.0612745	0.0361197	4045	tags=52%, list=21%, signal=42%	COL11A1/MMP3/LRRC15/CXCL6/FAP/RGS4/ADAM12/GREM1/TFPI2/CXCL1/MFAP5/COMP/CDH11/COL7A1/CTHRC1/VCAN/SCG2/SFRP4/INHBA/MATN3/PRSS2/LUM/DCN/IL6/THBS2/LOX/LAMA3/PLAUR/NNMT/CRLF1/CXCL8/PCOLCE2/BDNF/AREG/FBLN1/CDH6/COL5A1/COL12A1/SLIT2/ANPEP/POSTN/COL1A1/ITGA2/TNC/PDLIM4/DST/LOXL1/COL6A3/COL8A2/FBN2/FN1/VCAM1/PRRX1/LAMA2/OXTR/MMP1/COL3A1/SPP1/THBS1/FSTL3/FBLN2/FGF2/COL1A2/TGM2/PCOLCE/COL5A2/FOXC2/LAMA1/IL3…	THCA
HALLMARK_INTERFERON_GAMMA_RESPONSE	HALLMARK_INTERFERON_GAMMA_RESPONSE	198	0.661558	2.09069	0.0192308	0.0612745	0.0361197	5130	tags=66%, list=26%, signal=49%	CCL7/TNFAIP6/IL6/CFB/HLA-G/PTGS2/STAT4/ZBP1/C1S/CSF2RB/CD86/FPR1/FCGR1A/SECTM1/SLAMF7/CFH/GBP6/IRF8/ITGB7/CD69/CXCL11/C1R/PLA2G4A/PELI1/VCAM1/CIITA/GPR18/HLA-DQA1/MX2/CXCL10/CXCL9/CCL2/NOD1/XCL1/IL2RB/IL7/EPSTI1/CMKLR1/OASL/ICAM1/PNP/ARID5B/IDO1/FGL2/ST8SIA4/IFNAR2/CD274/SELP/IRF5/GZMA/UPP1/LY6E/RSAD2/NLRC5/CASP4/PSMB9/CASP1/FAS/SP110/KLRK1/PIM1/LCP2/RTP4/IL10RA/TRIM14/OAS3/IFIT2/IRF1/IRF9/TNFAIP…	THCA
HALLMARK_INFLAMMATORY_RESPONSE	HALLMARK_INFLAMMATORY_RESPONSE	200	0.641966	2.03819	0.0185185	0.0612745	0.0361197	4174	tags=62%, list=21%, signal=49%	ROS1/EREG/CXCL6/CD70/CCL24/CCL17/CCL20/CCL7/CCL22/TNFSF9/INHBA/TNFRSF9/LTA/AQP9/MARCO/IL12B/TNFAIP6/IL18R1/PTGER2/NOD2/IL6/GNA15/IL1A/PLAUR/CXCL8/SLAMF1/IL7R/EBI3/HRH1/PDPN/CSF3/LDLR/IL10/CLEC5A/RASGRP1/OSM/MEP1A/ITGB8/CCR7/HAS2/FPR1/PTPRE/OLR1/KCNJ2/ADGRE1/CD69/CXCL11/PIK3R5/IL18RAP/PTAFR/IL18/ADORA2B/LIF/MSR1/OSMR/CYBB/NLRP3/CXCL10/CXCL9/CD48/CXCR6/CCL2/IL2RB/PTGER4/SELL/ICOSLG/LCK/IL1B/TLR1/CM…	THCA
HALLMARK_KRAS_SIGNALING_UP	HALLMARK_KRAS_SIGNALING_UP	198	0.578656	1.82869	0.0192308	0.0612745	0.0361197	3738	tags=44%, list=19%, signal=36%	WNT7A/MMP10/EREG/CFHR2/RETN/PPBP/CCL20/CSF2/SERPINA3/NR1H4/SPON1/MMP11/TMEM158/ITGBL1/INHBA/KCNN4/HSD11B1/TMEM100/CFB/CIDEA/BIRC3/RBP4/PLAUR/PTGS2/IL7R/APOD/TLR8/CSF2RA/TNNT2/ADAMDEC1/FGF9/ITGA2/TMEM176A/CLEC4A/IL2RG/DOCK2/CFH/PDCD1LG2/ALDH1A3/IRF8/IGF2/IKZF1/ADAM8/RELN/PRRX1/PLAU/SLPI/MMP9/CD37/MAP4K1/GFPT2/LIF/GABRA3/GPNMB/ITGB2/CXCL10/LAT2/SNAP25/SEMA3B/TMEM176B/PCSK1N/LY96/IL1B/SPP1/PRKG2/CMK…	THCA
HALLMARK_INTERFERON_ALPHA_RESPONSE	HALLMARK_INTERFERON_ALPHA_RESPONSE	95	0.634897	1.78422	0.0188679	0.0612745	0.0361197	6152	tags=74%, list=31%, signal=51%	C1S/CXCL11/CXCL10/SELL/IL7/EPSTI1/GBP2/OASL/CSF1/LY6E/RSAD2/OAS1/PSMB9/CASP1/SP110/NCOA7/RTP4/TRIM14/IFIT2/IRF1/IRF9/HERC6/IFIT3/SAMD9/TAP1/IL4R/IFI30/DDX60/CCRL2/LAMP3/PROCR/RIPK2/IFI44L/PARP9/IFIH1/IRF7/PARP14/CD74/PSMB8/IFITM1/ISG15/PARP12/BATF2/ISG20/PLSCR1/SAMD9L/MX1/BST2/NMI/UBE2L6/CD47/TRIM21/CASP8/DHX58/HELZ2/IFI44/HLA-C/STAT2/B2M/MOV10/TMEM140/CMPK2/IFI27/LAP3/IFI35/CNP/PSME2/IFITM2/UBA7…	THCA
HALLMARK_IL2_STAT5_SIGNALING	HALLMARK_IL2_STAT5_SIGNALING	198	0.559052	1.76674	0.0192308	0.0612745	0.0361197	4665	tags=41%, list=24%, signal=32%	TNFSF11/CSF2/F2RL2/IL1RL1/IL1R2/CCR4/CTLA4/TNFRSF9/ICOS/IL2RA/TNFRSF18/IL18R1/PTGER2/LTB/BATF3/BATF/IL10/RHOH/TNFRSF8/CD86/MUC1/ADAM19/IRF8/SCN9A/LIF/CST7/IL13/CXCL10/CD48/EOMES/TNFRSF21/SYT11/IL2RB/SELL/SPP1/TIAM1/TGM2/PNP/SLC2A3/GPR65/SLC1A5/TLR7/MAFF/FGL2/NT5E/SELP/PENK/CSF1/TTC39B/AHR/PIM1/AGER/IL10RA/SERPINC1/TNFRSF1B/MYC/IL4R/ETV4/GLIPR2/FLT3LG/CD79B/CDCP1/ITIH5/NFKBIZ/BHLHE40/BCL2L1/PLIN2/…	THCA
HALLMARK_COMPLEMENT	HALLMARK_COMPLEMENT	200	0.549199	1.74366	0.0185185	0.0612745	0.0361197	3939	tags=42%, list=20%, signal=34%	MMP13/SERPINB2/PCSK9/MMP12/TFPI2/CXCL1/TMPRSS6/F5/ITIH1/PLG/CR1/FCN1/MMP8/IL6/CFB/PLAUR/C2/RASGRP1/C1S/CASP5/CR2/CD40LG/OLR1/HPCAL4/ITGAM/CFH/GZMK/PRSS3/C3/C1R/FN1/PLA2G4A/CP/PIK3R5/SPOCK2/KYNU/S100A9/SERPINA1/CDK5R1/WAS/PLEK/CTSC/LCK/DPP4/ANG/SCG3/DUSP5/GZMB/CD55/MAFF/GATA3/FCER1G/GZMA/PIK3CG/APOC1/LGALS3/CASP4/PSMB9/CASP1/S100A12/TIMP1/GNGT2/MMP14/PIM1/LCP2/CTSH/LRP1/SERPINC1/APOBEC3G/DGKH/IRF1…	THCA
HALLMARK_APOPTOSIS	HALLMARK_APOPTOSIS	160	0.553752	1.70078	0.0178571	0.0612745	0.0361197	5654	tags=51%, list=29%, signal=37%	EREG/CCNA1/LUM/DCN/IL6/GNA15/TNF/BIRC3/IL1A/PMAIP1/CD69/IL18/CD2/ERBB3/PLPPR4/IGFBP6/PLCB2/HGF/IL1B/FASLG/GUCY2D/BID/LGALS3/CASP4/CASP1/FAS/NEDD9/SLC20A1/TIMP1/NEFH/MMP2/FEZ1/TGFB2/TNFRSF12A/EGR3/CDC25B/IRF1/TOP2A/TAP1/HMOX1/IER3/ATF3/LEF1/CLU/F2/GSN/ANXA1/BCL2L1/CAV1/BGN/CD38/ANKH/EMP1/TIMP2/PRF1/ISG20/TNFSF10/GADD45A/BTG3/CFLAR/GCH1/SOD2/CASP8/LMNA/RARA/CASP6/TSPO/BAX/BCL10/PLAT/CASP7/CDKN1A/ER…	THCA
HALLMARK_P53_PATHWAY	HALLMARK_P53_PATHWAY	195	0.511333	1.61459	0.0181818	0.0612745	0.0361197	5995	tags=47%, list=31%, signal=33%	CLCA2/SERPINB5/NHLH2/TNFSF9/KRT17/KLK8/TP63/TCHH/SFN/IL1A/CDKN2A/PTPRE/ALOX15B/CDKN2B/ZNF365/LIF/ITGB4/CDK5R1/RRAD/DGKA/DRAM1/S100A10/SPHK1/TM4SF1/S100A4/UPP1/HBEGF/CASP1/FAS/TNNI1/INHBB/GLS2/PERP/TAP1/PLK3/RAP2B/HMOX1/DDB2/VWA5A/IER3/TGFA/VDR/IFI30/ATF3/TSC22D1/PROCR/ZMAT3/EPHA2/BAIAP2/PHLDA3/DEF6/IER5/TAX1BP3/TGFB1/PLK2/PDGFA/GADD45A/RNF19B/KLF4/ZFP36L1/TPD52L1/CTSF/ST14/PTPN14/CD82/BAX/RHBDF2/…	THCA
HALLMARK_COAGULATION	HALLMARK_COAGULATION	138	0.520191	1.55833	0.0172414	0.0612745	0.0361197	3997	tags=46%, list=20%, signal=37%	MMP3/SERPINB2/MMP10/F9/MMP7/TFPI2/F2RL2/TMPRSS6/COMP/FGA/MBL2/MMP11/ITIH1/KLK8/PLG/FGG/MMP8/CFB/CTSE/PROC/APOC3/C2/MEP1A/C1S/ITGA2/OLR1/TF/CFH/APOC2/C3/C1R/FN1/PLAU/MMP9/MMP1/SERPINA1/CTSK/PLEK/DPP4/ANG/THBS1/CFI/PRSS23/MAFF/PROS1/APOC1/TIMP1/CAPN5/MMP14/MMP2/CTSH/LRP1/SERPINC1/C1QA/SERPING1/SERPINE1/DUSP6/FBN1/CTSV/CLU/F2/GSN/ANXA1	THCA
HALLMARK_APICAL_JUNCTION	HALLMARK_APICAL_JUNCTION	199	0.484322	1.54219	0.0181818	0.0612745	0.0361197	4829	tags=40%, list=25%, signal=30%	DSC3/CNTN1/CDH11/VCAN/CDSN/DMP1/CLDN19/CALB2/CDH15/ADAM23/CLDN14/LAMA3/CLDN11/NECTIN4/CDH6/SLIT2/CD209/LAMB3/CD86/ITGA2/ALOX15B/ICAM5/CLDN6/VCAM1/RAC2/COL17A1/MMP9/ITGB4/DSC1/PTPRC/CADM2/FLNC/CADM3/CDH3/NECTIN1/FYB1/CLDN9/ICAM1/AMIGO2/GRB7/AMH/SLC30A3/MDK/CDH4/TGFBI/CD274/NLGN3/SIRPA/MMP2/ACTC1/KCNH2/CD276/NLGN2/SDC3/ADRA1B/ACTN1/COL16A1/FBN1/MPZL2/ITGA3/MYH10/LAMC2/SKAP2/ACTN3/BAIAP2/TRAF1/BMP1/…	THCA
HALLMARK_ANGIOGENESIS	HALLMARK_ANGIOGENESIS	36	0.62329	1.50817	0.02	0.0612745	0.0361197	4149	tags=44%, list=21%, signal=35%	CXCL6/VCAN/LUM/APOH/POSTN/OLR1/TNFRSF21/COL3A1/SPP1/COL5A2/S100A4/TIMP1/SERPINA5/PRG2/LPL/FSTL1	THCA
HALLMARK_OXIDATIVE_PHOSPHORYLATION	HALLMARK_OXIDATIVE_PHOSPHORYLATION	185	-0.473987	-1.48647	0.0208333	0.0612745	0.0361197	8009	tags=74%, list=41%, signal=44%	GRPEL1/DLST/ATP6V1D/NDUFV1/PMPCA/TIMM9/PDHB/ATP6AP1/SDHB/NDUFS6/NDUFB7/NDUFA4/LRPPRC/DECR1/UQCRQ/HADHA/MRPL15/MRPS30/NDUFB6/GPI/UQCRH/CS/NQO2/TOMM70/MRPS15/NDUFB3/SLC25A5/ECHS1/COX5A/TIMM50/MGST3/SDHA/COX17/RETSAT/UQCRB/NDUFC1/UQCR11/NDUFB8/NDUFS3/ETFA/PRDX3/HCCS/UQCRFS1/TIMM17A/UQCR10/HSD17B10/COX4I1/NDUFA2/NDUFA1/NDUFS2/ATP6V0B/SLC25A11/MTRR/DLAT/MRPL35/NDUFA6/IMMT/ATP6V1C1/OAT/TIMM13/IDH3B/NDU…	THCA
HALLMARK_E2F_TARGETS	HALLMARK_E2F_TARGETS	198	0.458619	1.44935	0.0192308	0.0612745	0.0361197	6169	tags=42%, list=31%, signal=29%	CDKN2A/DLGAP5/AURKB/MKI67/E2F8/RRM2/MELK/KIF4A/DIAPH3/MYBL2/TRIP13/KIF18B/ESPL1/CENPE/BIRC5/BRCA2/CDKN3/CDC25B/HMMR/TOP2A/CCNB2/JPT1/MYC/ORC6/HMGA1/PLK1/HELLS/LMNB1/CHEK2/ASF1B/MMS22L/CDCA8/MCM4/PLK4/EZH2/MCM5/GINS1/DONSON/DEPDC1/SPC25/SPC24/PRIM2/GINS3/STMN1/MCM6/CDCA3/RACGAP1/MTHFD2/UBE2T/POLD1/TK1/CENPM/DNMT1/KPNA2/ATAD2/TACC3/DCLRE1B/GINS4/MAD2L1/CDKN1A/TMPO/CKS1B/MCM2/BARD1/LBR/TCF19/PRDX4/W…	THCA
HALLMARK_KRAS_SIGNALING_DN	HALLMARK_KRAS_SIGNALING_DN	198	0.456068	1.44129	0.0192308	0.0612745	0.0361197	3492	tags=38%, list=18%, signal=32%	SPRR3/SERPINB2/CPB1/CALML5/KRT13/SLC6A14/EDAR/CD207/GP2/KRT5/KRT15/CCR8/CLPS/KRT1/KLK8/HTR1D/CCNA1/CD80/LGALS7/BMPR1B/PKP1/PTGFR/CACNG1/IL12B/SHOX2/KLK7/GDNF/NPHS1/UGT2B17/TCL1A/WNT16/SPTBN2/ABCB11/DCC/NTF3/SERPINA10/ARHGDIG/TGM1/AMBN/VPREB1/CD40LG/LYPD3/SMPX/IFNG/TNNI3/CLDN16/RYR1/NUDT11/PAX3/KCNMB1/PNMT/COL2A1/P2RX6/KCND1/P2RY4/SLC30A3/SLC12A3/FGF16/LFNG/STAG3/PRODH/MEFV/RSAD2/PDCD1/UPK3B/EDN1/…	THCA
HALLMARK_IL6_JAK_STAT3_SIGNALING	HALLMARK_IL6_JAK_STAT3_SIGNALING	87	0.557472	1.56929	0.0350877	0.0874126	0.0515274	4110	tags=53%, list=21%, signal=42%	REG1A/CSF2/CCL7/CXCL1/CRLF2/IL1R2/CXCL3/IL2RA/IL18R1/LTB/IL6/TNF/CXCL13/PLA2G2A/EBI3/CSF2RA/CSF2RB/IL2RG/IL12RB1/CXCL11/ITGA4/PIK3R5/CCR1/OSMR/CXCL10/CXCL9/TNFRSF21/IL7/IL1B/CSF1/FAS/PIM1/TNFRSF12A/IRF1/TNFRSF1B/IRF9/LEPR/CSF3R/IL4R/HMOX1/STAT1/IL15RA/MYD88/CD38/IL1R1/TLR2	THCA
HALLMARK_G2M_CHECKPOINT	HALLMARK_G2M_CHECKPOINT	194	0.453307	1.42937	0.037037	0.0874126	0.0515274	6341	tags=47%, list=32%, signal=32%	EFNA5/AURKB/KIF23/DMD/MKI67/BUB1/UBE2C/KIF4A/MYBL2/CENPA/POLQ/ESPL1/CENPE/BIRC5/CENPF/BRCA2/KNL1/NDC80/CDKN3/TROAP/CCNA2/NUSAP1/CDC25B/HMMR/CDC45/NEK2/KIF15/TOP2A/BCL3/CCNB2/TPX2/EXO1/JPT1/MYC/ORC6/HMGA1/PLK1/LMNB1/E2F2/NOTCH2/SLC7A5/PLK4/EZH2/MCM5/PBK/PRIM2/TGFB1/RASAL2/STMN1/MCM6/RACGAP1/KIF11/PRC1/FOXN3/CDC7/KPNA2/E2F1/HIF1A/TTK/TACC3/STIL/MAD2L1/GINS2/TMPO/CKS1B/MCM2/MEIS1/BARD1/LBR/RAD23B/RA…	THCA
HALLMARK_ESTROGEN_RESPONSE_LATE	HALLMARK_ESTROGEN_RESPONSE_LATE	197	0.444243	1.41101	0.037037	0.0874126	0.0515274	4257	tags=34%, list=22%, signal=27%	KRT13/TFPI2/SERPINA3/KLK11/TRIM29/CCNA1/RET/TPSAB1/CXCL14/TH/PRLR/SFN/KLK10/BATF/NMU/AREG/SULT2B1/GJB3/PTGES/DUSP2/MYB/DHRS2/NBL1/S100A9/TFAP2C/SERPINA1/KRT19/MICB/GAL/SEMA3B/ALDH3B1/SCNN1A/PGR/TIAM1/ASCL1/HR/CALCR/PRSS23/NRIP1/MDK/SNX10/PRKAR2B/IGSF1/NPY1R/EMP2/FABP5/SERPINA5/GALE/EGR3/FGFR3/CHST8/TOP2A/KIF20A/PERP/SLC27A2/RAB31/OPN3/TPBG/DNAJC12/CXCL12/LAMC2/SIAH2/CAV1/SLC7A5/PLK4/RAPGEFL1/SLC2…	THCA
HALLMARK_XENOBIOTIC_METABOLISM	HALLMARK_XENOBIOTIC_METABOLISM	196	0.439196	1.39421	0.0363636	0.0874126	0.0515274	4081	tags=27%, list=21%, signal=21%	REG1A/CYP26A1/XDH/MBL2/ADH7/ITIH1/PLG/HSD11B1/AQP9/CYP2S1/BCAT1/TYR/CFB/RBP4/CDO1/HGFAC/GCKR/FBLN1/SERPINA6/PTGES/CYP2C18/VNN1/IRF8/IGF1/FMO3/KYNU/ESR1/TMEM176B/CRP/ABCD2/PTGDS/SLC1A5/PROS1/SLC6A12/UPP1/SLC6A6/FAS/TGFB2/ABCC3/CYP2J2/SERPINE1/MAN1A1/HMOX1/DDC/TDO2/NPC1/ADH1C/PC/ANGPTL3/APOE/IL1R1/EPHA2	THCA
HALLMARK_MITOTIC_SPINDLE	HALLMARK_MITOTIC_SPINDLE	198	0.423864	1.33951	0.0384615	0.0874126	0.0515274	5914	tags=37%, list=30%, signal=26%	DST/DOCK2/DLGAP5/KIF23/ANLN/TIAM1/BUB1/KIF4A/ESPL1/WASF1/RAPGEF5/CENPE/BIRC5/CLIP2/CENPF/BRCA2/CDK5RAP2/NEDD9/NDC80/PIF1/LLGL1/ARHGAP4/KIF3C/NUSAP1/ARHGAP10/NEK2/KIF15/TOP2A/CCNB2/TPX2/PLK1/NET1/LMNB1/KNTC1/GSN/CDC42EP1/PLEKHG2/MYH10/TUBA4A/NOTCH2/FLNA/PALLD/SYNPO/TRIO/ABR/RASAL2/RHOF/RACGAP1/KIF11/RASA1/PRC1/MYO9B/CNTRL/ECT2/RASA2/MYO1E/TTK/ARF6/MAP1S/ARHGEF2/SAC3D1/ROCK1/NIN/ARHGAP27/ITSN1/AKAP…	THCA
HALLMARK_KRAS_SIGNALING_DN	HALLMARK_KRAS_SIGNALING_DN	198	0.561079	1.25198	0.039604	1	1	4578	tags=47%, list=23%, signal=36%	TFF2/BRDT/SNCB/GP2/CLPS/KRT4/FSHB/SPRR3/ABCB11/PTGFR/CPB1/TFAP2B/ACTC1/SERPINB2/HTR1D/NPY4R/ATP6V1B1/SERPINA10/SHOX2/SLC38A3/P2RY4/TNNI3/SCGB1A1/WNT16/PAX3/NOS1/HTR1B/ALOX12B/FGF16/SSTR4/GDNF/CLDN8/TGFB2/CHRNG/CKM/CLDN16/MYH7/IL5/SLC5A5/TFCP2L1/HSD11B2/YBX2/SMPX/PROP1/EGF/TAS2R4/NR4A2/ATP4A/UGT2B17/MYO15A/RGS11/PNMT/SPTBN2/MYOT/EDAR/KCNN1/NR6A1/CYP39A1/TGM1/IRS4/TENM2/FGF22/RYR2/CDH16/FGFR3/CPA2/…	THYM
HALLMARK_PANCREAS_BETA_CELLS	HALLMARK_PANCREAS_BETA_CELLS	40	0.722691	1.42218	0.0326087	0.326087	0.302059	2772	tags=40%, list=14%, signal=34%	GCG/SLC2A2/ISL1/INSM1/PKLR/PCSK1/G6PC2/DCX/NEUROD1/SCGN/PDX1/ABCC8/PAX4/INS/NEUROG3/AKT3	UCEC
HALLMARK_ALLOGRAFT_REJECTION	HALLMARK_ALLOGRAFT_REJECTION	196	0.683144	1.41662	0.01	0.326087	0.302059	4335	tags=55%, list=22%, signal=43%	IFNG/TRAT1/CCL11/CXCL13/MBL2/CRTAM/IRF4/KLRD1/ITK/EREG/CCR2/FASLG/CD80/NCR1/CD3G/IL12B/CXCL9/CCL19/NOS2/CD79A/IL12RB1/PRKCB/SIT1/INHBA/CXCR3/CCL7/IL18RAP/CD8A/GZMB/CCL13/IL2RA/F2/CD28/IL10/CCR5/CD96/IL16/CCL22/PRF1/KRT1/PTPRC/ZAP70/CD8B/CD247/GPR65/FYB1/CD40LG/CD3E/CD3D/LCK/CD2/CCL4/IL13/ITGAL/LCP2/IL2RB/CD7/ELANE/IRF8/CD86/IL11/IL2RG/STAT4/CCL5/HLA-DQA1/GZMA/MMP9/CD40/NLRP3/HLA-DOA/FCGR2B/CCR1/G…	UCEC
HALLMARK_INTERFERON_GAMMA_RESPONSE	HALLMARK_INTERFERON_GAMMA_RESPONSE	198	0.617199	1.27889	0.02	0.326087	0.302059	5421	tags=47%, list=28%, signal=34%	IRF4/ZBP1/GBP6/CXCL9/KLRK1/VCAM1/SLAMF7/CXCL11/CCL7/CD274/CD38/CMKLR1/CSF2RB/EPSTI1/FCGR1A/IL10RA/BATF2/FGL2/LCP2/IL2RB/GBP4/TNFAIP6/CD69/IRF8/CD86/CXCL10/ITGB7/STAT4/GPR18/PDE4B/SELP/IL18BP/FPR1/CCL5/HLA-DQA1/GZMA/CD40/OASL/CASP1/SAMD9L/IFI30/CIITA/NLRC5/IL15RA/RSAD2/ST8SIA4/LYSMD2/APOL6/PSMB9/ISG20/XAF1/CMPK2/VAMP5/IDO1/C1S/SOCS1/JAK2/GCH1/FAS/IL15/IRF1/ICAM1/OAS2/HLA-G/CCL2/IFIT3/TAP1/PLA2G4A/…	UCEC
HALLMARK_INFLAMMATORY_RESPONSE	HALLMARK_INFLAMMATORY_RESPONSE	200	0.604156	1.25157	0.03	0.326087	0.302059	4254	tags=42%, list=22%, signal=34%	MEP1A/EREG/SLAMF1/IL12B/CXCL9/KCNA3/CXCR6/TNFRSF9/CXCL11/INHBA/CCL7/CCL24/IL18RAP/CCR7/LTA/MEFV/IL10/PTGIR/CCL22/HAS2/P2RX7/IL7R/CCRL2/SELL/CMKLR1/SPHK1/CD70/LCK/CD48/PIK3R5/SELE/IL10RA/ADGRE1/MARCO/LCP2/IL2RB/TNFAIP6/CD69/TNFSF9/CXCL10/PTGER4/MSR1/CCL17/BDKRB1/OLR1/PDE4B/IL1A/EBI3/AQP9/GP1BA/FPR1/CCL5/CYBB/CD40/NLRP3/PTPRE/SERPINE1/C3AR1/PTAFR/RASGRP1/GPR183/RGS1/IL15RA/CLEC5A/OSM/NOD2/LAMP3/IL1…	UCEC
HALLMARK_EPITHELIAL_MESENCHYMAL_TRANSITION	HALLMARK_EPITHELIAL_MESENCHYMAL_TRANSITION	198	0.596656	1.23632	0.03	0.326087	0.302059	4822	tags=45%, list=25%, signal=34%	LRRC15/VCAM1/GREM1/FOXC2/MMP3/INHBA/DKK1/NTM/POSTN/FAP/SCG2/COMP/THBS2/PTHLH/RGS4/NID2/COL11A1/FGF2/GLIPR1/COL6A3/TIMP3/WIPF1/ABI3BP/GAS1/TNFRSF11B/AREG/SERPINE1/FBN1/MMP1/FN1/ECM2/GEM/BDNF/ADAM12/COL5A3/DPYSL3/CDH11/THBS1/TAGLN/COL5A2/MYLK/FBN2/DCN/ACTA2/LAMA2/NNMT/CXCL12/MGP/SNAI2/ITGA2/CTHRC1/COL5A1/LUM/SPOCK1/TGFBI/BGN/PDGFRB/EMP3/PRRX1/ITGA5/TGFB1/CD44/FAS/COL16A1/IL15/COL3A1/MMP2/COL1A1/TGM…	UCEC
HALLMARK_IL6_JAK_STAT3_SIGNALING	HALLMARK_IL6_JAK_STAT3_SIGNALING	87	0.621322	1.24724	0.0416667	0.347222	0.321637	4742	tags=40%, list=24%, signal=31%	CXCL13/IL9R/CRLF2/CSF2/CXCL9/IL12RB1/CXCL11/CCL7/IL2RA/CD38/ITGA4/CSF2RB/PLA2G2A/PIK3R5/CD36/CXCL10/IL2RG/CSF2RA/EBI3/INHBE/CCR1/IL15RA/IL1B/TNFRSF1B/PF4/SOCS1/TGFB1/CD44/FAS/IRF1/STAT1/ACVRL1/IL4R/CSF3R/HMOX1	UCEC
HALLMARK_ALLOGRAFT_REJECTION	HALLMARK_ALLOGRAFT_REJECTION	196	0.681648	1.65467	0.0119048	0.174825	0.13986	3403	tags=47%, list=17%, signal=39%	IL2/TRAT1/IFNG/F2/MBL2/FASLG/CD40LG/IL18RAP/CD3G/HLA-DOB/KRT1/CRTAM/NCR1/KLRD1/ITK/CXCR3/CXCL9/CXCL13/IL12B/CCR2/CCL22/CD96/CCR5/SIT1/CD2/ITGAL/PRKCG/IL13/CD7/CD3D/FYB1/CARTPT/IL12RB1/CD80/CD79A/IL4/TLR6/CCL4/CFP/LCK/PF4/CD247/ICOSLG/TLR1/IL1B/IL10/IL2RG/GPR65/PTPRC/IL18/GZMA/IL2RB/HLA-DQA1/LY75/IL2RA/GZMB/TNF/IRF8/ZAP70/GCNT1/LCP2/CCL19/TLR3/IGSF6/IL16/PRF1/CCR1/HLA-DOA/CCL5/PTPN6/HLA-DMB/LTB/GB…	UCS
HALLMARK_INFLAMMATORY_RESPONSE	HALLMARK_INFLAMMATORY_RESPONSE	200	0.62541	1.52117	0.0119048	0.174825	0.13986	5304	tags=63%, list=27%, signal=46%	ROS1/MEP1A/TNFRSF9/IL18RAP/LTA/SLAMF1/CXCL9/TACR1/IL7R/CSF3R/IL12B/CXCR6/CCR7/TNFSF15/CCL22/OLR1/CCL17/KCNA3/CXCL11/HPN/ADGRE1/GPR132/CD69/SLC4A4/ITGB3/LCK/ICOSLG/TLR1/CXCL6/IL1B/IL10/CCL20/CCL24/FFAR2/IL18/SELL/CXCL8/IL2RB/SLC31A2/PTAFR/SLC7A2/F3/LCP2/TLR3/CCRL2/EBI3/RASGRP1/ITGB8/NOD2/LAMP3/RTP4/CXCL10/PTPRE/CLEC5A/EDN1/PIK3R5/CD48/CCL5/IL18R1/IL1A/LIF/MEFV/MARCO/TNFSF10/ICAM1/OSM/IL10RA/SGMS2/…	UCS
HALLMARK_COAGULATION	HALLMARK_COAGULATION	138	0.615791	1.47497	0.0240964	0.174825	0.13986	4684	tags=46%, list=24%, signal=35%	FGG/APOC3/MEP1A/FGA/F2/MBL2/CTSE/F9/HNF4A/HRG/TMPRSS6/MMP8/APOA1/F13B/C9/ITIH1/OLR1/TF/CFB/HPN/ITGB3/ITGA2/PF4/SERPINB2/SERPINA1/C3/F3/PROC/KLK8/TFPI2/KLKB1/MMP3/APOC2/COMP/CFI/S100A1/PLAT/C1S/GP1BA/PLEK/C2/GDA/GP9/SERPINE1/HMGCS2/ANXA1/MMP11/C8G/CTSO/MMP10/TIMP3/CFH/CTSV/KLF7/CD9/MMP7/PLG/MMP9/CTSK/PLAU/RAPGEF3/MASP2/MST1	UCS
HALLMARK_COMPLEMENT	HALLMARK_COMPLEMENT	200	0.59412	1.44506	0.0119048	0.174825	0.13986	5381	tags=46%, list=27%, signal=33%	APOA4/F2/C4BPB/CD40LG/HNF4A/TMPRSS6/MMP8/GZMK/C9/MMP13/ITIH1/MMP12/OLR1/CASP5/DGKG/CFB/CP/CR2/CXCL1/PIK3CG/LCK/SERPINB2/SERPINA1/GZMA/C3/F3/GZMB/TFPI2/LCP2/KLKB1/PLA2G7/RASGRP1/CASP10/KYNU/PIK3R5/APOBEC3G/LTF/CCL5/ITGAM/FCN1/CASP1/CPM/GATA3/CR1/PLAT/DOCK4/C1S/TNFAIP3/GP1BA/PLEK/HPCAL4/CDH13/DOCK10/C2/S100A9/CASP4/LYN/CTSS/CA2/S100A12/GCA/GP9/WAS/SERPINE1/IRF1/SCG3/IL6/PLAUR/PRSS3/CTSO/CFH/CTSV/CD…	UCS
HALLMARK_INTERFERON_GAMMA_RESPONSE	HALLMARK_INTERFERON_GAMMA_RESPONSE	198	0.585288	1.42284	0.0238095	0.174825	0.13986	5329	tags=54%, list=27%, signal=40%	KLRK1/SLAMF7/CXCL9/GPR18/ITGB7/XAF1/ZBP1/CFB/CXCL11/CIITA/GBP6/BANK1/CD69/CD274/EPSTI1/CSF2RB/GZMA/IL2RB/HLA-DQA1/ISG20/SAMD9L/IRF8/LCP2/RTP4/CXCL10/IRF9/APOL6/CCL5/PTPN6/HERC6/CASP1/IRF4/TRIM14/TNFSF10/ICAM1/IL10RA/CD38/ST8SIA4/DDX60/IL15/IFI44L/C1S/IL7/TNFAIP3/VCAM1/GBP4/CD86/STAT4/IL15RA/CASP4/BATF2/IFIH1/OAS2/GCH1/HLA-DMA/IRF5/FPR1/CASP8/IRF1/HLA-G/RNF213/FGL2/VAMP8/OASL/PARP14/IL6/DHX58/IFI3…	UCS
HALLMARK_IL6_JAK_STAT3_SIGNALING	HALLMARK_IL6_JAK_STAT3_SIGNALING	87	0.63868	1.40407	0.0384615	0.174825	0.13986	5039	tags=54%, list=26%, signal=40%	IL9R/CSF2/CXCL9/CSF3R/CXCL13/CXCL3/CXCL11/DNTT/REG1A/IL12RB1/CSF2RB/ITGB3/CXCL1/PF4/IL1B/IL2RG/IL2RA/TNF/EBI3/CRLF2/LEPR/CXCL10/CSF2RA/IRF9/PIK3R5/CCR1/IL18R1/LTB/PLA2G2A/CD38/IL7/TLR2/MAP3K8/IL15RA/IRF1/IL6/CD9/FAS/IL4R/SOCS3/OSMR/IL1R1/CSF1/STAT1/ITGA4/ACVR1B/STAT2	UCS
HALLMARK_BILE_ACID_METABOLISM	HALLMARK_BILE_ACID_METABOLISM	112	0.607097	1.40319	0.0375	0.174825	0.13986	2729	tags=21%, list=14%, signal=18%	HAO1/HSD3B1/NR0B2/GC/SOAT2/AKR1D1/CYP8B1/SLC23A1/TTR/APOA1/SERPINA6/NR1H4/ABCA6/LCK/PIPOX/SULT2B1/SLC27A2/ABCA9/ALDH8A1/DIO1/ABCD2/ABCA4/ABCA8	UCS
HALLMARK_TNFA_SIGNALING_VIA_NFKB	HALLMARK_TNFA_SIGNALING_VIA_NFKB	199	0.57398	1.39972	0.0357143	0.174825	0.13986	6079	tags=53%, list=31%, signal=37%	TNFRSF9/CSF2/IL7R/IL12B/SIK1/CXCL3/BIRC3/OLR1/IL23A/CXCL11/CD69/CD80/CXCL1/CXCL2/CCL4/SERPINB2/ICOSLG/CXCL6/IL1B/CCL20/IL18/F3/TNF/BCL2A1/CCRL2/AREG/CXCL10/PTPRE/KYNU/TRAF1/EDN1/CCL5/SERPINB8/LAMB3/ZC3H12A/IL1A/LIF/F2RL1/ICAM1/NR4A2/EGR2/SLC2A3/TNFAIP3/EGR3/DRAM1/DUSP4/TLR2/PLEK/MAP3K8/IL15RA/IFIH1/TNFSF9/GCH1/REL/SERPINE1/IRF1/FOSB/PHLDA1/IL6/PLAUR/NFAT5/CFLAR/LDLR/CLCF1/ATF3/IRS2/GPR183/PTGS2/P…	UCS
HALLMARK_XENOBIOTIC_METABOLISM	HALLMARK_XENOBIOTIC_METABOLISM	196	0.574381	1.39429	0.0357143	0.174825	0.13986	4829	tags=34%, list=25%, signal=26%	CRP/ADH7/FABP1/MBL2/GSTA3/VTN/FETUB/HNF4A/HRG/CYP2C18/SERPINA6/CCL25/FMO3/ITIH1/ACSM1/CYP17A1/CES1/CFB/XDH/IGFBP1/ABCC2/REG1A/DDC/ARG1/HSD11B1/ESR1/ABCC3/GCKR/IRF8/GAD1/ADH1C/CYP4F2/ABCD2/VNN1/AKR1C2/KYNU/FBP1/TAT/CYP1A1/GCNT2/ANGPTL3/MAOA/UPB1/AQP9/TMEM176B/SLC6A12/CA2/GCH1/SLC46A3/LEAP2/CYP2S1/SERPINE1/RBP4/CYP2J2/CYP26A1/ITIH4/MAN1A1/PLG/HSD17B2/CNDP2/FAS/PSMB10/SLC6A6/F10/PAPSS2/IL1R1	UCS
HALLMARK_KRAS_SIGNALING_UP	HALLMARK_KRAS_SIGNALING_UP	198	0.567244	1.37898	0.0357143	0.174825	0.13986	4916	tags=44%, list=25%, signal=34%	NR0B2/CSF2/SERPINA3/IL7R/ANXA10/PPBP/ADAMDEC1/BIRC3/NR1H4/TLR8/PIGR/CFB/CIDEA/ITGA2/ARG1/HSD11B1/MALL/IL1B/GALNT3/IL2RG/CCL20/PDCD1LG2/CLEC4A/IKZF1/HKDC1/GABRA3/IRF8/BTC/ADAM8/RELN/TPH1/CXCL10/TRAF1/CSF2RA/SATB1/PRDM1/DOCK2/MAP7/ABCB1/LIF/ALDH1A2/F2RL1/IL10RA/TMEM176A/PLEK2/PLAT/KCNN4/PRKG2/FGF9/TNFAIP3/IL33/LAT2/CD37/LCP1/TMEM176B/CTSS/CA2/C3AR1/EPB41L3/TSPAN1/IL1RL2/SCG3/NAP1L2/SNAP91/SLPI/RBP4…	UCS
HALLMARK_KRAS_SIGNALING_DN	HALLMARK_KRAS_SIGNALING_DN	198	0.566542	1.37727	0.0357143	0.174825	0.13986	3339	tags=31%, list=17%, signal=26%	CYP11B2/SLC6A14/IFNG/GP2/CCR8/SLC12A3/SERPINA10/NPHS1/CLPS/CD40LG/DCC/SCGB1A1/KRT1/KRT15/PROP1/KRT13/TCL1A/SCN10A/MYO15A/AMBN/IL12B/PDCD1/CACNA1F/TGM1/PRODH/UPK3B/HNF1A/KRT4/ALOX12B/CLDN16/OXT/CD80/EDAR/TFF2/SERPINB2/SPRR3/SLC16A7/CLDN8/CAPN9/SIDT1/FSHB/TSHB/KLK8/PKP1/EDN2/FGFR3/KLHDC8A/CPA2/KLK7/EDN1/TAS2R4/NR6A1/MEFV/MFSD6/PLAG1/NR4A2/CCNA1/IFI44L/SLC38A3/GP1BA/CDH16/UGT2B17	UCS
HALLMARK_ESTROGEN_RESPONSE_LATE	HALLMARK_ESTROGEN_RESPONSE_LATE	197	0.533005	1.29266	0.047619	0.198413	0.15873	4916	tags=34%, list=25%, signal=26%	KLK11/KRT13/SERPINA3/SOX3/TFF1/KLK10/SERPINA5/PGR/TH/GJB3/ST6GALNAC2/TMPRSS3/SCNN1A/SERPINA1/AGR2/FRK/TFF3/ISG20/SULT2B1/TJP3/PLAC1/SLC27A2/TFPI2/PDZK1/LAMC2/FGFR3/AREG/OVOL2/TRIM29/CLIC3/MAPK13/PKP3/LTF/PTPN6/ASCL1/BATF/CCNA1/LLGL2/EGR3/KRT19/NRIP1/PERP/S100A9/CA2/CDH1/HMGCS2/CELSR2/ANXA9/ALDH3B1/PCP4/SLC9A3R1/NPY1R/HSPB8/CA12/PLXNB1/IGSF1/CD9/KCNK5/FAM102A/TFAP2C/ST14/RAB31/SLC22A5/SLC24A3/PAPS…	UCS
HALLMARK_ALLOGRAFT_REJECTION	HALLMARK_ALLOGRAFT_REJECTION	196	0.552208	1.31498	0.0210526	1	1	3479	tags=36%, list=18%, signal=30%	CARTPT/CCL11/TRAT1/IL12B/IFNG/IL13/CRTAM/CXCL13/CD3G/ITK/KLRD1/FASLG/PRKCG/CCL22/CD96/IL15/GPR65/IL11/TNF/HLA-DOB/ZAP70/ST8SIA4/CD8B/STAT4/IL4/IL10/HDAC9/PTPRC/SIT1/NCR1/CCR5/LCK/CCR2/CD8A/CD247/CD40LG/GBP2/KRT1/LIF/IL2RA/IL18/GCNT1/CCL13/IL7/FYB1/TLR6/IL1B/CD3D/CXCR3/TGFB2/CXCL9/INHBA/IL12RB1/CD2/CD7/IL12A/TLR2/LTB/IL2RB/PRKCB/IL18RAP/CCL4/CD3E/IRF8/TLR3/GZMA/LCP2/CD1D/BCAT1/FAS/CCL19	UVM
